# Supplementary material
Source: Research Square preprint supplement (doi:10.21203/rs.3.rs-9178344/v1)
Supplement: Supplementary file 1 [file 688d1dc97a58dd0abf08885c.xlsx]

## Sheet: Legend
STable 1	Top level PPMI cohort participants. Provides descriptive statistics regarding top-level PPMI study cohorts (PD, Prodromal, Controls)
STable 2	PPMI analysis subgroup participants. Provides descriptive statistics regarding PPMI analysis subgroups (iPD, LRRK2 PD, GBA PD, LRRK2 Control, GBA Control, Hyposmia, RBD)
STable 3	Splice junction differential expression summary statistics. Comparison of backspliced junction (BSJ) and forward-spliced junction (FSJ) expression in PPMI top-line cohorts and analysis subgroups compared to controls.
STable 4	Global patterns of back- and forward-spliced junction expression. For each splice junction locus, we provide the mean (±95% confidence interval) moderated t-statistic for each subgroup comparison versus controls. P-values were calculated using 10,000 bootstraps to generate a null distribution centered on a mean moderated t-statistic of 0.
STable 5	Differences in global patterns of back- and forward-spliced junction expression. Differences in moderated t-statistics between backspliced junctions (BSJ) and forward-spliced junctions (FSJ) for each subgroup versus controls were assessed against a null distribution generated by 10,000 permutations.
STable 6	Transposable element subfamily differential expression summary statistics. Comparison of transposable element subfamily expression between PPMI top-line cohorts and analysis subgroups compared to controls.
STable 7	Global patterns of transposable element subfamily expression. For each transposable element subfamily, we provide the mean (±95% confidence interval) moderated t-statistic for each subgroup comparison versus controls. P-values were calculated using 10,000 bootstraps to generate a null distribution centered on a mean moderated t-statistic of 0.
STable 8	Gene differential expression summary statistics. Differential expression was calculated for PPMI analysis subgroups compared to controls.
STable 9	Transcription factor activity. Inferred from decoupleR using moderated t-statistics calculated by comparing gene expression between PPMI analysis subgroups and controls.
STable 10	Gene set enrichment analysis of Reactome terms. Ranked moderated t-statistics calculated by comparing gene expression between PPMI analysis subgroups and controls were used as input for gene set enrichment analysis.

## Sheet: STable1
	PD	Prodromal	Control
	(N=490)	(N=264)	(N=162)
Age at consent (years)
Mean (SD)	63.4 (± 10.1)	59.9 (± 12.8)	60.5 (± 11.7)
Sex
Male	291 (59 %)	119 (45 %)	103 (64 %)
Female	199 (41 %)	145 (55 %)	59 (36 %)
Disease duration (months)
Mean (SD)	13.8 (± 18.8)	NA (± NA)	NA (± NA)
Missing	50 (10.2%)	264 (100%)	162 (100%)
LEDD (mg/day)
Mean (SD)	131 (± 316)	2.64 (± 14.1)	0 (± 0)
Missing	50 (10.2%)	85 (32.2%)	0 (0%)
MDS-UPDRS III
Mean (SD)	21.5 (± 9.35)	3.13 (± 3.91)	1.28 (± 2.24)
Missing	81 (16.5%)	85 (32.2%)	2 (1.2%)
MoCA
Mean (SD)	27.1 (± 2.44)	26.8 (± 2.66)	28.3 (± 1.09)
Missing	52 (10.6%)	85 (32.2%)	0 (0%)

## Sheet: STable2
	iPD	LRRK2 PD	GBA PD	LRRK2 Control	GBA Control	Hyposmia	RBD
	(N=324)	(N=125)	(N=36)	(N=136)	(N=76)	(N=18)	(N=24)
Age at consent (years)
Mean (SD)	62.6 (± 9.56)	65.7 (± 10.6)	63.4 (± 11.3)	58.7 (± 12.6)	56.5 (± 13.9)	67.6 (± 6.55)	70.2 (± 6.35)
Sex
Male	209 (65 %)	61 (49 %)	21 (58 %)	59 (43 %)	25 (33 %)	12 (67 %)	20 (83 %)
Female	115 (35 %)	64 (51 %)	15 (42 %)	77 (57 %)	51 (67 %)	6 (33 %)	4 (17 %)
Disease duration (months)
Mean (SD)	6.62 (± 6.55)	35.1 (± 25.0)	28.2 (± 29.4)	NA (± NA)	NA (± NA)	NA (± NA)	NA (± NA)
Missing	0 (0%)	38 (30.4%)	12 (33.3%)	136 (100%)	76 (100%)	18 (100%)	24 (100%)
LEDD (mg/day)
Mean (SD)	0 (± 0)	549 (± 454)	339 (± 400)	3.43 (± 18.0)	4.44 (± 12.7)	0 (± 0)	0 (± 0)
Missing	0 (0%)	38 (30.4%)	12 (33.3%)	45 (33.1%)	40 (52.6%)	0 (0%)	0 (0%)
MDS-UPDRS III
Mean (SD)	20.9 (± 8.87)	23.2 (± 10.4)	25.4 (± 12.6)	3.18 (± 4.08)	2.86 (± 4.09)	3.00 (± 3.66)	3.96 (± 3.61)
Missing	0 (0%)	63 (50.4%)	16 (44.4%)	45 (33.1%)	40 (52.6%)	0 (0%)	0 (0%)
MoCA
Mean (SD)	27.2 (± 2.37)	26.7 (± 2.77)	27.3 (± 2.24)	26.6 (± 2.77)	27.4 (± 2.06)	27.1 (± 1.64)	26.1 (± 3.69)
Missing	0 (0%)	40 (32.0%)	12 (33.3%)	45 (33.1%)	40 (52.6%)	0 (0%)	0 (0%)
	324	125	36	136	76	18	24

## Sheet: STable 3
coord_id	logFC_BSJ	AveExpr_BSJ	t_BSJ	P.Value_BSJ	adj.P.Val_BSJ	B_BSJ	gene_id	gene_name	contrast	logFC_FSJ	AveExpr_FSJ	t_FSJ	P.Value_FSJ	adj.P.Val_FSJ	B_FSJ
17:59731420-59738947:+	-1.11517	-1.68249	-5.08371	4.5073494963271457e-7	7.567839804333278e-4	5.98153	ENSG00000062716	VMP1	GBA_Control_v_Control	1.692764221712549	3.532795800546199	2.3454860504377804	0.0192248	0.5181226712443692	-3.21825
10:5785141-5800705:-	-1.0671	-2.77215	-4.69351	3.105457230963884e-6	0.00260703	4.204788333300058	ENSG00000057608	GDI2	GBA_Control_v_Control	-0.655543	2.140854390214994	-0.95109	0.3418212913861265	0.8605768339808534	-5.14519
12:9680922-9694969:+	-1.13083	-2.59422	-4.36135	1.443080670074919e-5	0.00807644	2.835263895411961	ENSG00000069493	CLEC2D	GBA_Control_v_Control	-2.04273	3.2330052064037043	-3.10462	0.00196654	0.3283825104480537	-1.46672
9:85618982-85633374:-	-1.04891	-1.71503	-4.29332	1.9526967510549913e-5	0.00819644	2.5776699753312453	ENSG00000135049	AGTPBP1	GBA_Control_v_Control	0.0397516	0.20016834791915536	0.0638429	0.9491098812707314	0.9951955291565148	-5.50685
1:7777159-7778169:+	-1.15046	-2.95779	-4.19641	2.983229094085437e-5	0.010017683297938899	2.187555480631806	ENSG00000049245	VAMP3	GBA_Control_v_Control	-1.27824	2.239115171055957	-1.97291	0.0488208	0.64312	-3.88895
9:112250928-112252788:-	-0.810239	-1.968	-4.04032	5.7960083946217335e-5	0.0117315	1.605556204234027	ENSG00000119314	PTBP3	GBA_Control_v_Control	-0.162562	0.0440477	-0.292946	0.7696332168645539	0.9821086447545352	-5.46081
11:86022366-86031611:-	-1.03515	-2.03113	-4.01264	6.508145021547624e-5	0.0117315	1.5029040114404202	ENSG00000073921	PICALM	GBA_Control_v_Control	0.8081278718757218	2.1050127145960835	1.1276308559469852	0.2597849953684366	0.842534	-5.00485
7:158759485-158764853:-	-1.06213	-0.0508751	-4.01533	6.443654712528082e-5	0.0117315	1.4871437441492663	ENSG00000117868	ESYT2	GBA_Control_v_Control	0.029073422130375892	3.0394610435129787	0.10015561699159768	0.920244	0.9885407591470613	-5.56192
15:62007307-62013992:-	-1.05608	-2.18023	-3.96554	7.90977721741865e-5	0.0117315	1.3299288743007232	ENSG00000129003	VPS13C	GBA_Control_v_Control	-0.0815623	3.17763	-0.14772	0.8825975299225174	0.9826798758222193	-5.54972
6:17665238-17669546:-	-1.00061	-2.73342	-3.9643	7.947973415192778e-5	0.0117315	1.324660822825149	ENSG00000124789	NUP153	GBA_Control_v_Control	-0.392471	-0.147151	-0.595822	0.5514483204321694	0.9240336626802519	-5.35155
15:55348331-55348725:-	-0.887124	-2.86404	-3.92521	9.33005451437325e-5	0.0117315	1.1828446135926258	ENSG00000260916	CCPG1	GBA_Control_v_Control	-0.255502	0.32309135368126085	-0.492002	0.6228411282058857	0.937919	-5.39904
14:99257470-99257839:-	-0.588637	0.2601837978316181	-3.92092	9.494699604403598e-5	0.0117315	1.1264560007387132	ENSG00000127152	BCL11B	GBA_Control_v_Control	-0.183428	1.802032558602816	-0.373381	0.708956	0.9633841297999743	-5.47808
15:80120327-80122800:+	-0.621523	1.6024521525148092	-3.93269	9.049061569048923e-5	0.0117315	1.1155169294940297	ENSG00000086666	ZFAND6	GBA_Control_v_Control	-0.592935	2.8651269697368646	-0.962937	0.3358449671631515	0.8605768339808534	-5.16713
12:46239678-46243314:-	-1.05878	-2.37122	-3.89702	1.0467540231279489e-4	0.0117315	1.0822008423548706	ENSG00000111371	SLC38A1	GBA_Control_v_Control	-0.395677	-3.00728	-0.544551	0.5862027502781687	0.937919	-5.43307
1:155676547-155679512:-	-0.796237	-1.23177	-3.88861	1.082740729333145e-4	0.0117315	1.043147364336722	ENSG00000163374	YY1AP1	GBA_Control_v_Control	0.6700782411428823	-4.51281	1.470512564233613	0.1417948413436716	0.7727919682936442	-4.68739
21:36338778-36344707:+	-0.751492	1.0934917620490874	-3.88077	1.1179493496918966e-4	0.0117315	0.938574	ENSG00000159256	MORC3	GBA_Control_v_Control	0.19793542125201935	3.1843800984639117	0.5389615492461987	0.5900504970021339	0.937919	-5.44462
8:70159504-70162854:-	-0.807004	-1.58171	-3.7878	1.6213748343611736e-4	0.014654924199155074	0.6882018793336799	ENSG00000140396	NCOA2	GBA_Control_v_Control	-0.142797	3.2448100632685724	-0.425969	0.6702351021026718	0.9579118935070294	-5.49684
7:129014978-129018157:-	-0.741082	-2.03371	-3.77329	1.7170679288536496e-4	0.014654924199155074	0.6450613718947649	ENSG00000064419	TNPO3	GBA_Control_v_Control	0.0644295	2.9032505516318525	0.17748010852411167	0.8591723686868562	0.9821086447545352	-5.53956
14:21503172-21503881:-	-0.739782	-0.592453	-3.7757	1.7008204894642675e-4	0.014654924199155074	0.6190698758205073	ENSG00000165819	METTL3	GBA_Control_v_Control	-0.296391	3.0661135157700112	-1.23839	0.21590383747604106	0.8059861096765057	-4.90506
5:123545416-123557564:+	-0.877782	-0.0260454	-3.76928	1.7456729242590915e-4	0.014654924199155074	0.5806935477448629	ENSG00000151292	CSNK1G3	GBA_Control_v_Control	0.416194	0.12176035516048578	0.9089398386746798	0.36363219394589963	0.878138	-5.15274
5:65988634-66014725:+	-0.887134	-2.42204	-3.73606	1.987664771925836e-4	0.015529615425013427	0.5177110431708103	ENSG00000112851	ERBIN	GBA_Control_v_Control	0.3109233725726983	-3.59579	0.5310423683670206	0.5955241987351299	0.937919	-5.44839
2:233388256-233390483:+	-1.04957	-2.96946	-3.72669	2.0623241698493198e-4	0.015529615425013427	0.4873357857839169	ENSG00000077044	DGKD	GBA_Control_v_Control	-0.23225	-0.61938	-0.368432	0.7126403151945016	0.9633841297999743	-5.44408
1:112653597-112659779:+	-1.18523	-2.4964	-3.70775	2.2220740287500677e-4	0.015529615425013427	0.4202775986772904	ENSG00000116489	CAPZA1	GBA_Control_v_Control	-1.38659	2.5680346075679674	-1.68711	0.0919394	0.6963735360482091	-4.33159
2:45546731-45562756:-	-0.890594	-2.876	-3.70535	2.2405112865980136e-4	0.015529615425013427	0.4147117203099686	ENSG00000068784	SRBD1	GBA_Control_v_Control	-0.409909	1.0592821775221095	-0.717969	0.47296777449240257	0.8996202637244488	-5.29498
2:238182064-238185287:-	-0.979858	-2.7687	-3.69726	2.3123310638793073e-4	0.015529615425013427	0.38645180829982273	ENSG00000132323	ILKAP	GBA_Control_v_Control	-0.569715	0.5022373640234719	-1.10004	0.2716158453761072	0.84418	-4.99487
19:18342858-18343415:+	-0.80862	-2.44045	-3.67789	2.491902773284656e-4	0.015561245401589882	0.3202326634378787	ENSG00000130517	PGPEP1	GBA_Control_v_Control	-0.105753	0.5256623248689654	-0.265413	0.7907540484440059	0.9821086447545352	-5.47131
12:120154969-120155719:-	-0.62816	-0.81895	-3.67321	2.5373786001325546e-4	0.015561245401589882	0.27640447204526986	ENSG00000266704,ENSG00000089154	MIR4498,GCN1	GBA_Control_v_Control	-0.202369	1.2982262097989616	-1.21296	0.2254709372583829	0.8106331984086187	-4.89819
12:66203710-66228370:+	-0.917004	-2.84813	-3.66272	2.641981835017725e-4	0.015561245401589882	0.2704815039834578	ENSG00000090376	IRAK3	GBA_Control_v_Control	-0.679488	2.215770868042295	-1.04255	0.2974431738485067	0.8545498894132294	-5.07422
7:66127703-66134374:+	-0.856773	-2.27547	-3.64623	2.814641868607965e-4	0.015561245401589882	0.2121647773469757	ENSG00000241258,ENSG00000249319	CRCP,AC068533.4	GBA_Control_v_Control	-0.231032	0.5786758790625504	-0.41299	0.6797149678784757	0.9579118935070294	-5.43137
10:26500818-26503274:+	-0.792604	-2.0848	-3.64184	2.8623318924087644e-4	0.015561245401589882	0.19625870046594152	ENSG00000077420	APBB1IP	GBA_Control_v_Control	0.2845944722962044	2.2094	0.5363208902047227	0.5918731276731509	0.937919	-5.42999
4:3086938-3107423:+	-0.794468	-2.18867	-3.63999	2.882701696492422e-4	0.015561245401589882	0.19004818493694753	ENSG00000197386	HTT	GBA_Control_v_Control	-0.521479	0.700933	-1.12047	0.2628189558397219	0.84418	-4.9822
X:1285777-1290509:+	-0.962342	-2.18031	-3.62756	3.0235557093124307e-4	0.015561245401589882	0.1484748688503128	ENSG00000198223	CSF2RA	GBA_Control_v_Control	-1.13217	2.278231086704326	-1.80103	0.0720422	0.6538315432996799	-4.16203
2:171925536-171953001:+	-0.938124	-2.10786	-3.62326	3.0735271567819915e-4	0.015561245401589882	0.13339421139086038	ENSG00000128708	HAT1	GBA_Control_v_Control	-0.647481	0.50794292683954545	-1.37127	0.17064178665528412	0.7871086807533572	-4.7135
7:92213194-92226682:-	-0.831297	-2.97203	-3.61666	3.151175364229041e-4	0.015561245401589882	0.1171800444210307	ENSG00000001631,ENSG00000285953	KRIT1,AC000120.4	GBA_Control_v_Control	-0.496414	-0.23809	-0.828809	0.4074385224803766	0.8827087649054147	-5.21236
13:24475471-24478276:-	-0.852121	-2.89222	-3.56174	3.8782339703444805e-4	0.018087652322801063	-0.063227	ENSG00000102699	PARP4	GBA_Control_v_Control	-0.828389	2.0122575879318756	-1.36388	0.17295684595946448	0.7934519372994149	-4.74075
12:69800208-69801721:+	-0.410457	1.4449016720569816	-3.596	3.4082634583529884e-4	0.0163499	-0.079456	ENSG00000258052,ENSG00000127328	AC025263.2,RAB3IP	GBA_Control_v_Control	0.052431917143885634	0.9830690737086663	0.322932	0.7468239232657652	0.9765711582268066	-5.46219
14:73147794-73148094:+	-0.850234	-2.91741	-3.54559	4.12042057787392e-4	0.018205753026974504	-0.116755	ENSG00000080815	PSEN1	GBA_Control_v_Control	-1.91356	1.9813035576208544	-2.95362	0.00322483	0.3283825104480537	-1.85888
10:110964124-110985765:+	-0.671906	-1.28677	-3.55029	4.048440608940832e-4	0.018205753026974504	-0.130834	ENSG00000108061	SHOC2	GBA_Control_v_Control	-0.626687	3.5642939775668285	-1.52335	0.12803294557255868	0.749015	-4.57685
8:132727797-132757294:-	-0.599465	-1.42164	-3.52175	4.503555962149919e-4	0.018903676151124288	-0.217709	ENSG00000165071	TMEM71	GBA_Control_v_Control	-0.343634	3.6305611890727763	-0.740239	0.45935345360323776	0.8992031284658809	-5.33631
1:29035825-29039426:+	-0.719496	-0.0829533	-3.53245	4.327841064734073e-4	0.0186319	-0.231672	ENSG00000159023	EPB41	GBA_Control_v_Control	2.2067110816946993	1.2123793959751135	2.3812446551785196	0.017467293706608395	0.5181226712443692	-3.14421
3:149846010-149872154:+	-0.710791	-2.10073	-3.50559	4.782068109460762e-4	0.0191169	-0.254746	ENSG00000082996	RNF13	GBA_Control_v_Control	-0.19561	4.496506670135341	-0.33805	0.7354062602496584	0.9681161654065235	-5.53775
4:143543508-143543972:+	-0.776704	-0.753042	-3.50967	4.7107091581979167e-4	0.0191169	-0.278564	ENSG00000153147	SMARCA5	GBA_Control_v_Control	-0.167968	2.8810521975181227	-0.955238	0.33972106004495206	0.8605768339808534	-5.16897
3:31576395-31600459:+	-0.696918	-2.11454	-3.48255	5.207076802312273e-4	0.0203318	-0.328219	ENSG00000163527	STT3B	GBA_Control_v_Control	-0.744731	3.814829498911161	-1.85012	0.0646333	0.648659	-4.10122
2:197078702-197090032:-	-0.781367	-3.07815	-3.44688	5.934907871681263e-4	0.022567634065474282	-0.431662	ENSG00000065413	ANKRD44	GBA_Control_v_Control	1.2880000802768405	0.6507986472877493	1.3847118027645802	0.1664936235319686	0.7871086807533572	-4.70835
1:90937484-90982370:-	-0.723541	-3.1026	-3.42982	6.315820993511383e-4	0.022567634065474282	-0.485201	ENSG00000122482	ZNF644	GBA_Control_v_Control	-0.807151	0.8049050513842638	-1.47678	0.14009575700602503	0.7708265928614896	-4.59304
2:189719571-189720787:+	-0.684937	-1.78928	-3.42879	6.339406584967833e-4	0.022567634065474282	-0.503713	ENSG00000151687	ANKAR	GBA_Control_v_Control	0.1116	0.140016	0.412563	0.6800275101943951	0.9579118935070294	-5.42427
19:57455652-57456182:-	-0.884001	-1.91939	-3.41832	6.58614692798237e-4	0.022567634065474282	-0.537359	ENSG00000178201,ENSG00000268163	VN1R1,AC004076.1	GBA_Control_v_Control	-0.11199	-1.92906	-0.504708	0.6138908025372725	0.937919	-5.40185
7:48502125-48502552:+	-0.923633	-1.44836	-3.42137	6.515615627851438e-4	0.022567634065474282	-0.540209	ENSG00000179869	ABCA13	GBA_Control_v_Control	-0.589913	-3.39133	-2.52604	0.011711020581634589	0.46816198944201126	-2.8426
3:155829687-155834041:-	-0.69691	-2.5672	-3.4112	6.757277791634727e-4	0.0226706	-0.546905	ENSG00000284952,ENSG00000169359	AC104472.3,SLC33A1	GBA_Control_v_Control	-1.03372	1.6180702271984786	-2.7396	0.00627666	0.3941686450609576	-2.37002
11:755878-760253:+	-0.634767	-2.04154	-3.4006	7.021260820869232e-4	0.0226706	-0.590735	ENSG00000177156	TALDO1	GBA_Control_v_Control	-0.975032	7.049555765677885	-2.10192	0.035845956874298826	0.6278743191681722	-3.6842
11:130260855-130261929:-	-0.518205	0.40320089027573225	-3.42921	6.32966539331099e-4	0.022567634065474282	-0.599098	ENSG00000196323	ZBTB44	GBA_Control_v_Control	-0.00887619	2.239855455559667	-0.0590345	0.952938	0.9951955291565148	-5.54416
20:58438944-58441083:+	-0.771433	-1.20958	-3.40494	6.912290402702814e-4	0.0226706	-0.602429	ENSG00000124164	VAPB	GBA_Control_v_Control	-0.0124384	1.3122765854062126	-0.0487794	0.9611062198012765	0.9951955291565148	-5.51538
7:32620403-32639365:-	-0.942306	-2.7973	-3.39122	7.263979833114879e-4	0.022758970332558384	-0.608712	ENSG00000229358	DPY19L1P1	GBA_Control_v_Control	-0.105231	-4.23101	-0.357716	0.7206424347452383	0.9670804091739919	-5.57712
20:21365420-21368590:+	-0.752482	-1.97068	-3.38529	7.419460922400458e-4	0.022758970332558384	-0.636726	ENSG00000088930	XRN2	GBA_Control_v_Control	-0.661819	2.7773885058452734	-1.31029	0.19044244061858454	0.8007786065832116	-4.81371
7:92294888-92327900:+	-0.587207	-1.39156	-3.37089	7.813108864129073e-4	0.022758970332558384	-0.703604	ENSG00000001629	ANKIB1	GBA_Control_v_Control	0.2261036667134344	-0.494491	0.5064997404345062	0.6126334836916372	0.937919	-5.38645
1:100424221-100442996:+	-0.747651	-2.82506	-3.35752	8.195888385391303e-4	0.022758970332558384	-0.711841	ENSG00000079335	CDC14A	GBA_Control_v_Control	-1.36632	1.775821548954573	-2.67715	0.00756409	0.39687857940957605	-2.51044
4:102304316-102315830:-	-0.534171	-1.10014	-3.36616	7.946717205041093e-4	0.022758970332558384	-0.732054	ENSG00000138821	SLC39A8	GBA_Control_v_Control	-0.0882813	1.5806899198342226	-0.529572	0.5965429331362597	0.937919	-5.40536
9:83679774-83686155:-	-0.658408	-1.51086	-3.35963	8.134431766615789e-4	0.022758970332558384	-0.739586	ENSG00000135018	UBQLN1	GBA_Control_v_Control	0.4436827826657378	-2.76807	0.6619375110481827	0.5081855747203751	0.9184537997368243	-5.34245
13:21400372-21425678:-	-0.918178	-1.45388	-3.35684	8.219750559497345e-4	0.022758970332558384	-0.744844	ENSG00000180776	ZDHHC20	GBA_Control_v_Control	0.24028509424168432	-2.19046	0.3758297084246298	0.7071346065952515	0.9633841297999743	-5.46026
14:32090501-32094386:+	-0.666781	-1.51323	-3.35505	8.26859553475915e-4	0.022758970332558384	-0.745994	ENSG00000100852	ARHGAP5	GBA_Control_v_Control	-0.743724	1.7822174614285922	-2.92755	0.00350491	0.3283825104480537	-1.92356
12:56603358-56605327:-	-0.454132	-0.765293	-3.36482	7.984752186736032e-4	0.022758970332558384	-0.747436	ENSG00000076108	BAZ2A	GBA_Control_v_Control	0.00636331	2.6113397256981186	0.0408118	0.9674552656259363	0.9964404752602921	-5.55561
13:49451552-49451909:+	-0.885052	-2.69968	-3.33789	8.790409312051532e-4	0.0233287	-0.774496	ENSG00000136169	SETDB2	GBA_Control_v_Control	-0.78623	0.19346773215735744	-1.72373	0.0851092	0.6837243181037749	-4.25948
4:39737419-39755739:+	-0.826601	-2.86375	-3.33286	8.948310300331244e-4	0.0233287	-0.788312	ENSG00000078140	UBE2K	GBA_Control_v_Control	-0.871227	-4.27789	-1.72773	0.0843977	0.6837243181037749	-4.33521
13:27581296-27581803:-	-0.829792	-2.20054	-3.33205	8.974530483124102e-4	0.0233287	-0.802977	ENSG00000139517	LNX2	GBA_Control_v_Control	-0.644954	-0.217871	-1.81217	0.0703026	0.648659	-4.12775
7:27629370-27632445:-	-0.76446	-3.16404	-3.30952	9.718776554993868e-4	0.0233287	-0.857078	ENSG00000106049	HIBADH	GBA_Control_v_Control	-0.307577	-1.12709	-0.634531	0.5259005025517474	0.9210556552849787	-5.34671
14:45118027-45130790:-	-0.930743	-2.10729	-3.31084	9.676956315849533e-4	0.0233287	-0.868189	ENSG00000100442	FKBP3	GBA_Control_v_Control	-1.00114	1.589300556877302	-2.57882	0.010076253740117717	0.4640552493031974	-2.72701
4:38089931-38103157:+	-0.736525	-1.74488	-3.30731	9.794724204266218e-4	0.0233287	-0.888551	ENSG00000065882	TBC1D1	GBA_Control_v_Control	0.27944159348789643	2.418150648895892	0.6639258760716804	0.5069126713937919	0.9184537997368243	-5.3566
6:57124733-57142095:+	-0.690094	-2.01949	-3.29427	0.00102549	0.0233287	-0.922593	ENSG00000112200	ZNF451	GBA_Control_v_Control	-0.0957792	1.009713326590277	-0.225287	0.8218089686951343	0.9821086447545352	-5.48504
2:175970763-175995646:-	-0.719759	-1.79862	-3.29523	0.00102203	0.0233287	-0.924666	ENSG00000144320	LNPK	GBA_Control_v_Control	0.84346	-1.39412	1.5800458359637473	0.11445781038092534	0.7345628302307478	-4.45975
12:28225794-28259442:+	-0.915313	-1.57617	-3.29493	0.00102358	0.0233287	-0.932435	ENSG00000123106,ENSG00000273989	CCDC91,AC022079.1	GBA_Control_v_Control	0.5438249801071544	-0.614838	1.0156346258138804	0.3100841862978856	0.8559777364617792	-5.06393
2:32114637-32116212:+	-0.737417	-2.81212	-3.28176	0.00107151	0.0233287	-0.944373	ENSG00000021574	SPAST	GBA_Control_v_Control	0.34224298059394975	-0.721297	0.5114328931989011	0.6091770123166416	0.937919	-5.39893
1:180824752-180825344:+	-0.717503	-3.1528	-3.27865	0.00108326	0.0233287	-0.949187	ENSG00000143324	XPR1	GBA_Control_v_Control	-1.21141	0.0729247	-2.40832	0.016232	0.5181226712443692	-3.08122
2:196139619-196146055:-	-0.836618	-2.85378	-3.278	0.00108574	0.0233287	-0.955652	ENSG00000081320	STK17B	GBA_Control_v_Control	-1.03144	2.5553310661574646	-1.17016	0.24225369845801573	0.8317872386728188	-4.95169
9:109050282-109073438:-	-0.697416	-2.98866	-3.27724	0.00108862	0.0233287	-0.955976	ENSG00000106771	TMEM245	GBA_Control_v_Control	0.36643043537266173	-1.48372	0.7492241476780971	0.4539235061034125	0.8984832800622368	-5.28309
9:37126311-37126942:+	-0.98665	-3.12854	-3.27499	0.00109766	0.0233287	-0.9632	ENSG00000147905	ZCCHC7	GBA_Control_v_Control	-1.01095	-0.0370244	-1.45769	0.14528416480161846	0.7771342433481119	-4.61514
10:97436416-97437750:-	-0.731347	-1.63922	-3.28333	0.00106565	0.0233287	-0.965571	ENSG00000171311	EXOSC1	GBA_Control_v_Control	0.00508207	1.0858495939461914	0.0173656	0.9861489160251722	0.9972131172193971	-5.50777
10:27142386-27145590:-	-0.769181	-1.75968	-3.27932	0.0010807	0.0233287	-0.972915	ENSG00000136758	YME1L1	GBA_Control_v_Control	0.11698735587109876	1.757990116082935	0.25068943411106925	0.8021130893552737	0.9821086447545352	-5.51018
6:160046497-160048543:+	-0.802225	-1.16551	-3.28031	0.00107723	0.0233287	-0.99807	ENSG00000197081	IGF2R	GBA_Control_v_Control	-0.402383	5.572672111137266	-1.01002	0.3127654056997503	0.8559777364617792	-5.14741
1:59321535-59346398:+	-0.697255	-2.99856	-3.26127	0.00115105	0.023399678850082796	-1.00343	ENSG00000172456	FGGY	GBA_Control_v_Control	-0.517558	0.17253456495640787	-1.09497	0.2738320699570278	0.84418	-5.00252
17:47169916-47172064:-	-0.816086	-3.14474	-3.25874	0.00116126	0.023399678850082796	-1.01135	ENSG00000004897	CDC27	GBA_Control_v_Control	-0.766441	0.7127575601268852	-1.12904	0.2591925091183548	0.842534	-4.97327
8:47396375-47407961:+	-0.847696	-2.89692	-3.25718	0.00116761	0.023399678850082796	-1.01745	ENSG00000164808	SPIDR	GBA_Control_v_Control	0.0984916	0.16997155149888002	0.15028523757179427	0.8805742186287011	0.9826798758222193	-5.48748
5:79619611-79623489:+	-0.603053	-2.30918	-3.25875	0.00116119	0.023399678850082796	-1.02386	ENSG00000164329	TENT2	GBA_Control_v_Control	-0.539365	3.128667288947671	-1.38349	0.1668664199021112	0.7871086807533572	-4.74588
8:37765525-37766355:+	-0.666562	-0.368074	-3.27645	0.00109163	0.0233287	-1.03821	ENSG00000147471	PLPBP	GBA_Control_v_Control	-0.0453813	3.2493307743994935	-0.289137	0.7725448081740228	0.9821086447545352	-5.53082
12:120557281-120557682:+	-0.876332	-1.98225	-3.25495	0.00117695	0.023399678850082796	-1.04156	ENSG00000022840	RNF10	GBA_Control_v_Control	-0.475075	2.544917779239915	-0.604715	0.5455251949216178	0.9210556552849787	-5.39121
X:65051461-65075912:+	-0.596922	-0.579024	-3.25301	0.00118462	0.023399678850082796	-1.10377	NA	NA	GBA_Control_v_Control	0.0789454	0.0773408	0.26585299350746927	0.7904150375541223	0.9821086447545352	-5.46539
8:70213902-70216764:-	-0.806908	-2.61506	-3.22744	0.00129442	0.025270979486512742	-1.10987	ENSG00000140396	NCOA2	GBA_Control_v_Control	-1.21747	1.6359103891341054	-1.85155	0.0644267	0.648659	-4.07815
3:101671129-101672213:-	-0.845282	-2.66154	-3.22141	0.00132176	0.025270979486512742	-1.12887	ENSG00000066422	ZBTB11	GBA_Control_v_Control	-0.247131	1.2170465604189107	-0.458969	0.6463703496406683	0.9528145891542424	-5.42577
2:86127160-86127991:+	-0.598866	-1.77527	-3.22078	0.00132451	0.025270979486512742	-1.14714	ENSG00000132300	PTCD3	GBA_Control_v_Control	0.1581866912580132	1.8573935022522208	0.4563922633879362	0.6482212009730263	0.9529980119380987	-5.4407
6:131160058-131169273:+	-0.733273	-3.06124	-3.20857	0.0013814	0.026060396348541775	-1.16007	ENSG00000118507	AKAP7	GBA_Control_v_Control	-0.258299	-0.169608	-0.511711	0.6089822788923938	0.937919	-5.38374
4:150798080-150817257:-	-0.733009	-2.51561	-3.20144	0.00141566	0.026298258778205786	-1.18807	ENSG00000198589	LRBA	GBA_Control_v_Control	0.12374931421009805	1.700094199343858	0.20178041681053252	0.8401352974220182	0.9821086447545352	-5.50777
17:19958013-19958571:-	-0.707128	-2.37106	-3.19626	0.001441	0.026298258778205786	-1.20848	ENSG00000108599	AKAP10	GBA_Control_v_Control	-0.437724	1.211240512886015	-0.786748	0.4316423140839246	0.8914236720134187	-5.25191
16:53155925-53157541:+	-0.7916	-2.97022	-3.18942	0.00147513	0.0263484	-1.2164	ENSG00000177200	CHD9	GBA_Control_v_Control	-1.47422	0.4780996325265057	-2.80249	0.0051831	0.378366	-2.22702
7:23611170-23611553:+	-0.95923	-1.95013	-3.19003	0.00147283	0.0263484	-1.23339	ENSG00000169193	CCDC126	GBA_Control_v_Control	-0.0724143	0.6476508246490875	-0.174411	0.8615829007045811	0.9821086447545352	-5.49058
6:167022408-167033971:+	-0.7332	-3.04176	-3.17953	0.00152582	0.026685976073121367	-1.24481	ENSG00000272980,ENSG00000213066	Z94721.2,CEP43	GBA_Control_v_Control	-0.145551	-0.878477	-0.240242	0.8101986317249756	0.9821086447545352	-5.47549
12:28255580-28259442:+	-1.02496	-0.972434	-3.199	0.0014287	0.026298258778205786	-1.2484	ENSG00000123106	CCDC91	GBA_Control_v_Control	0.084489	-5.25661	0.2859007607820046	0.7750839887096921	0.9821086447545352	-5.67129
10:5794884-5800705:-	-0.816544	-2.40417	-3.1802	0.00152242	0.026685976073121367	-1.25209	ENSG00000057608	GDI2	GBA_Control_v_Control	-0.876705	2.873193021982277	-1.59818	0.1103632667790227	0.730176	-4.46438
2:58084088-58089723:+	-0.847802	-2.96448	-3.17603	0.00154429	0.0267306	-1.25958	ENSG00000028116	VRK2	GBA_Control_v_Control	-0.529064	0.861825	-0.903	0.36677422050887687	0.8801117196442911	-5.16658
6:170388286-170395579:+	-0.718076	-3.21848	-3.16986	0.00157692	0.027016889981398385	-1.27091	ENSG00000112584	FAM120B	GBA_Control_v_Control	-1.11977	0.999498	-1.93835	0.052901504754360444	0.648659	-3.93694
18:196636-204692:+	-0.704937	-3.17098	-3.16117	0.00162421	0.0275026	-1.29908	ENSG00000101557	USP14	GBA_Control_v_Control	-0.959072	-0.0972906	-2.02766	0.0428975	0.641135	-3.78434
12:813641-830160:+	-0.737124	-3.01526	-3.15867	0.00163804	0.0275026	-1.3074	ENSG00000060237	WNK1	GBA_Control_v_Control	-0.0579046	-1.66978	-0.0789869	0.9370611143716894	0.9915398309595024	-5.50533
2:101257790-101262691:+	-0.747072	-3.22747	-3.14349	0.00172446	0.0282333	-1.34672	ENSG00000158435	CNOT11	GBA_Control_v_Control	-1.23437	-0.404143	-2.41831	0.015795872445268273	0.5181226712443692	-3.06131
1:236806143-236816543:+	-0.636369	-2.86803	-3.13394	0.00178093	0.028477889494177244	-1.37782	ENSG00000116984	MTR	GBA_Control_v_Control	-0.0844608	0.762394	-0.135299	0.8924062974057807	0.9839569195536666	-5.50159
12:46229152-46254936:-	-0.76422	-2.09871	-3.13844	0.0017541	0.0283186	-1.38125	ENSG00000274591,ENSG00000111371	AC025031.3,SLC38A1	GBA_Control_v_Control	0.33059880904947647	0.9378073889132678	0.4509035865951581	0.6521707657634755	0.9529980119380987	-5.42795
17:35478074-35480195:-	-0.653456	-1.68705	-3.1422	0.001732	0.0282333	-1.38304	ENSG00000286065,ENSG00000205045	AC015911.11,SLFN12L	GBA_Control_v_Control	-0.209582	3.0468778154855394	-0.660009	0.5094216553809445	0.9192732117699425	-5.36491
2:24564294-24593721:+	-0.731598	-3.03528	-3.12746	0.00182024	0.028831899631142924	-1.3959	ENSG00000084676	NCOA1	GBA_Control_v_Control	0.20912507988210471	-1.20879	0.3036422606764243	0.7614726445089137	0.9821086447545352	-5.47286
1:92333390-92380873:+	-0.693649	-2.23449	-3.1031	0.00197519	0.030706876160801803	-1.47906	ENSG00000122484	RPAP2	GBA_Control_v_Control	-0.360216	0.8809404736494432	-1.15216	0.24956826955583059	0.842534	-4.94958
10:15816834-15847943:-	-0.673685	-2.48986	-3.09257	0.0020458	0.0313403	-1.50497	ENSG00000148481	MINDY3	GBA_Control_v_Control	1.4600693653389616	-0.0136454	2.994127798894413	0.00282979	0.3283825104480537	-1.76986
14:75109684-75110371:-	-0.721225	-3.07853	-3.08525	0.0020963	0.0313403	-1.51577	ENSG00000119638	NEK9	GBA_Control_v_Control	-0.135903	0.7729630842462392	-0.242961	0.8080924656021659	0.9821086447545352	-5.48127
4:48684672-48710698:-	-0.619152	-2.43317	-3.08503	0.00209782	0.0313403	-1.52506	ENSG00000075539	FRYL	GBA_Control_v_Control	0.065418	2.919297048184908	0.13956826409175804	0.8890332379238561	0.9837948889599599	-5.53854
18:9583116-9595153:-	-0.661283	-2.8231	-3.0822	0.00211764	0.0313403	-1.5279	ENSG00000154845	PPP4R1	GBA_Control_v_Control	-0.34962	2.8230676149565412	-0.593211	0.5531934719649834	0.9250172658990637	-5.394
12:116230532-116237705:-	-0.519911	0.3614703498506157	-3.11994	0.00186679	0.029292890275891242	-1.54956	ENSG00000123066	MED13L	GBA_Control_v_Control	1.1674508546756874	-1.59715	1.7204792622268912	0.0856989	0.6851834827376199	-4.27064
5:176943334-176958154:-	-0.790213	-1.28051	-3.08989	0.00206467	0.0313403	-1.55648	ENSG00000087206	UIMC1	GBA_Control_v_Control	-0.451302	2.9915549515004045	-1.38709	0.16576701655114368	0.7871086807533572	-4.73473
2:8943186-8958642:-	-0.56584	2.1126790969321707	-3.14568	0.00171193	0.0282333	-1.56152	ENSG00000143797	MBOAT2	GBA_Control_v_Control	0.22197191971517527	-5.36855	0.7285942224006516	0.46686564152035714	0.8996202637244488	-5.47648
21:37420298-37472880:+	-0.481369	-1.15152	-3.08075	0.00212793	0.0313403	-1.59051	ENSG00000157540	DYRK1A	GBA_Control_v_Control	1.1319140193277022	2.0914693772519835	1.9787444979438933	0.048158	0.641725	-3.88467
6:30650993-30651466:+	-0.377644	-0.921635	-3.07573	0.0021637	0.031589977119313835	-1.60612	ENSG00000204564	C6orf136	GBA_Control_v_Control	-0.0759074	-0.0139757	-0.710596	0.477524	0.8996202637244488	-5.28231
3:182884752-182887713:+	-0.708819	-1.20557	-3.07266	0.00218596	0.0316399	-1.61518	ENSG00000058063	ATP11B	GBA_Control_v_Control	-0.00470938	3.4342653772892175	-0.0102026	0.9918619817120775	0.9990718280437094	-5.5719
10:119515508-119527424:-	-0.67781	-2.25127	-3.05553	0.00231325	0.0329148	-1.61799	ENSG00000148908	RGS10	GBA_Control_v_Control	-1.30814	3.9580423028525726	-2.35169	0.018909347152175106	0.5181226712443692	-3.20486
2:207724799-207742342:+	-0.824563	-2.91773	-3.0469	0.00238021	0.033297334097879334	-1.62694	ENSG00000163249	CCNYL1	GBA_Control_v_Control	-0.356659	-1.46932	-0.782248	0.4342805874363076	0.8928243844429979	-5.25222
15:68141945-68164804:+	-0.681942	-3.18477	-3.04607	0.00238648	0.033297334097879334	-1.62719	ENSG00000033800	PIAS1	GBA_Control_v_Control	-0.100404	0.027027623439860635	-0.165875	0.8682938367969925	0.9821086447545352	-5.48828
15:25405460-25411971:-	-0.805421	-1.00569	-3.06901	0.00221321	0.0317605	-1.63211	ENSG00000114062	UBE3A	GBA_Control_v_Control	1.259535448319772	-2.5986	1.983952393566868	0.047573281776495696	0.641135	-3.86765
2:101294013-101295181:-	-0.584736	-2.08027	-3.0302	0.00251417	0.034249	-1.69207	ENSG00000163162	RNF149	GBA_Control_v_Control	-0.430004	5.430803227170774	-1.00669	0.31436075144674575	0.8559777364617792	-5.14765
8:51860860-51861246:-	-0.595431	-2.17588	-3.02762	0.00253555	0.034249	-1.69752	ENSG00000168300	PCMTD1	GBA_Control_v_Control	-0.832204	0.621826	-1.09684	0.2730122657906489	0.84418	-5.00622
2:106145189-106166083:-	-0.679719	-2.82967	-3.01394	0.0026515	0.0352599	-1.71926	ENSG00000115652	UXS1	GBA_Control_v_Control	-0.860828	1.2129231750893466	-1.88923	0.059191033388304566	0.648659	-4.01402
5:109713519-109729513:+	-0.525617	-0.490409	-3.0419	0.00241946	0.033297334097879334	-1.73993	ENSG00000112893	MAN2A1	GBA_Control_v_Control	0.8322699546256427	-1.35549	1.2829569520075725	0.19984691377556968	0.802695	-4.82505
13:77719531-77753358:+	-0.473575	-1.1193	-3.0259	0.0025498	0.034249	-1.75505	ENSG00000139737	SLAIN1	GBA_Control_v_Control	0.7151876261746475	0.6505999669907089	2.1684246285212687	0.0303952	0.6075423480878022	-3.53812
6:13579450-13584225:+	-0.494762	0.046937101189525675	-3.04378	0.00240456	0.033297334097879334	-1.76	ENSG00000124523	SIRT5	GBA_Control_v_Control	0.1436624294990366	0.6526327594358888	0.6627200962207302	0.5076842957105772	0.9184537997368243	-5.317
1:230954332-230961303:-	-0.593999	-1.74396	-2.99981	0.00277628	0.035856708371348155	-1.79092	ENSG00000143643	TTC13	GBA_Control_v_Control	-0.307518	2.499182060265929	-1.27521	0.2025719955598008	0.8027947461613064	-4.85773
15:64974601-64983593:-	-0.516591	-0.933301	-3.00973	0.00268807	0.0352599	-1.80342	ENSG00000090487	SPG21	GBA_Control_v_Control	0.6463422122315414	3.417612090182857	1.484006499656094	0.13816735421440957	0.7663736145306105	-4.63188
1:111147641-111161296:+	-0.444881	-1.03972	-3.00239	0.00275313	0.0358334	-1.8143	ENSG00000134255	CEPT1	GBA_Control_v_Control	0.047688	2.1765407113733666	0.1302494440628754	0.8963990172119187	0.9839569195536666	-5.52882
12:66145840-66153448:-	-0.653494	-3.11278	-2.9766	0.00299304	0.0373105	-1.81715	ENSG00000155957,ENSG00000228144	TMBIM4,AC078927.1	GBA_Control_v_Control	-0.797424	3.2900275885860646	-1.10343	0.27014430742998025	0.84418	-5.02354
14:39276933-39279537:+	-0.717194	-2.3604	-2.98094	0.00295146	0.0373105	-1.82254	ENSG00000150527	MIA2	GBA_Control_v_Control	-0.466156	3.0108952195096212	-1.00721	0.3141116308517474	0.8559777364617792	-5.12522
6:149771161-149773169:+	-0.442722	-0.389179	-3.01032	0.00268296	0.0352599	-1.82729	ENSG00000120265	PCMT1	GBA_Control_v_Control	1.0113998154123127	-1.39109	1.3302828618846774	0.18377173708857678	0.8007786065832116	-4.77098
17:61984170-61985090:-	-0.561094	-0.970658	-2.99416	0.00282772	0.0362423	-1.84796	ENSG00000108510	MED13	GBA_Control_v_Control	0.0750267	0.6880129476099275	0.1392624310629541	0.8892748257011889	0.9837948889599599	-5.50666
5:143037195-143057747:+	-0.638168	-2.3918	-2.96958	0.00306162	0.0373105	-1.84904	ENSG00000145819	ARHGAP26	GBA_Control_v_Control	-0.943703	2.9374910060318946	-1.56017	0.11908120749957467	0.7357016639037067	-4.51317
X:65075473-65113813:+	-0.751777	-2.50005	-2.96872	0.00307018	0.0373105	-1.85033	NA	NA	GBA_Control_v_Control	-0.616251	-0.74098	-1.43068	0.1528784568152364	0.786634	-4.64267
2:190659157-190673152:+	-0.548742	-1.2388	-2.97235	0.00303439	0.0373105	-1.89205	ENSG00000138386	NAB1	GBA_Control_v_Control	0.00616438	2.5143962410326592	0.026483653737342128	0.9788776077719785	0.9971506702600866	-5.54989
3:56627036-56628614:-	-0.731938	-1.46077	-2.96687	0.00308884	0.0373105	-1.89591	ENSG00000163946	TASOR	GBA_Control_v_Control	0.0876977	1.967698655713468	0.25424350246299376	0.7993671850784159	0.9821086447545352	-5.50468
12:28305648-28307749:+	-0.799128	-2.54651	-2.95091	0.00325135	0.0384438	-1.90085	ENSG00000123106	CCDC91	GBA_Control_v_Control	-0.576014	1.5379507577514238	-1.09059	0.2757519214895212	0.84418	-5.01695
7:44645326-44647759:+	-0.594821	-2.71423	-2.94531	0.00330986	0.0388265	-1.90755	ENSG00000105953	OGDH	GBA_Control_v_Control	0.5738609936311452	-0.113715	0.903331	0.36659877002366015	0.8801117196442911	-5.15763
8:123337624-123339446:-	-0.724349	-2.11119	-2.94342	0.00332997	0.0388265	-1.93199	ENSG00000156802	ATAD2	GBA_Control_v_Control	-0.148591	-0.299002	-0.438571	0.6610807039186045	0.9579118935070294	-5.41469
3:51541497-51590559:+	-0.522522	-1.28625	-2.9557	0.00320143	0.038375195480390194	-1.93343	ENSG00000164080	RAD54L2	GBA_Control_v_Control	0.3745392640244338	1.0137501917517069	1.4364517698333326	0.15123112394525576	0.786634	-4.64256
21:36362182-36364259:+	-0.71863	-2.63182	-2.93673	0.00340191	0.039391722868594534	-1.93681	ENSG00000159256	MORC3	GBA_Control_v_Control	-0.101207	-2.43668	-0.151778	0.8793968718581591	0.9826798758222193	-5.52738
1:147275353-147285487:+	-0.662352	-2.85915	-2.93042	0.00347105	0.039917088624544884	-1.95041	ENSG00000131778,ENSG00000237188	CHD1L,AC242426.2	GBA_Control_v_Control	-0.66788	1.202189851798071	-1.40477	0.16044336258300143	0.7871086807533572	-4.68393
2:97813970-97818721:-	-0.663953	-2.75437	-2.92614	0.00351868	0.040024948929944446	-1.96315	ENSG00000075568	TMEM131	GBA_Control_v_Control	-0.192809	-0.306004	-0.318367	0.7502823848836446	0.9780466802947511	-5.45171
1:51402434-51408332:-	-0.72074	-2.90633	-2.9253	0.00352811	0.040024948929944446	-1.96479	ENSG00000085832	EPS15	GBA_Control_v_Control	-0.716272	0.6650255655116633	-1.03044	0.30308884702296335	0.8553046509813077	-5.06132
9:83682950-83686155:-	-0.597664	-0.565376	-2.95364	0.00322269	0.038375195480390194	-1.97032	ENSG00000135018	UBQLN1	GBA_Control_v_Control	-0.248263	2.1507496867499993	-0.580293	0.5618663228687357	0.9294320749720268	-5.39594
7:35667433-35673278:-	-0.771754	-2.93303	-2.91826	0.00360807	0.0406574	-1.97905	ENSG00000122557	HERPUD2	GBA_Control_v_Control	-0.484799	1.6750966630767452	-0.768497	0.44239937996406464	0.8938490480862389	-5.27567
13:32517856-32527532:-	-0.641045	0.6745501770729733	-2.96725	0.00308553	0.0373105	-2.01295	ENSG00000244754	N4BP2L2	GBA_Control_v_Control	0.0687559	3.5789486793492222	0.16483338668872416	0.8691132000210959	0.9821086447545352	-5.56605
7:100023418-100024307:+	-0.472323	1.2155847622747282	-2.96743	0.00308294	0.0373105	-2.04497	ENSG00000106261	ZKSCAN1	GBA_Control_v_Control	-0.0292668	1.0977615263885294	-0.0912465	0.9273176440307245	0.9910670428565159	-5.51242
14:95140658-95141748:-	-0.61035	-2.94322	-2.8913	0.0039293	0.0427614	-2.05029	ENSG00000100697	DICER1	GBA_Control_v_Control	-0.862193	1.8456860825570058	-1.67959	0.0933938	0.6963735360482091	-4.33375
8:94885066-94885558:-	-0.719386	-3.08868	-2.88576	0.00399854	0.0427614	-2.0626	ENSG00000175305	CCNE2	GBA_Control_v_Control	-1.05314	-1.67696	-3.23327	0.00126965	0.269094	-1.1309
13:21161789-21172681:-	-0.681585	-2.63202	-2.88956	0.00395094	0.0427614	-2.06301	ENSG00000165480	SKA3	GBA_Control_v_Control	0.27197190946131844	-4.15059	0.8584633438604309	0.39087178412552703	0.8825577718216362	-5.31766
15:50586391-50592626:-	-0.587311	-2.32876	-2.89433	0.00389193	0.0427614	-2.06396	ENSG00000092439	TRPM7	GBA_Control_v_Control	-0.747194	1.857478226863599	-1.90744	0.0567914	0.648659	-3.99221
9:93471140-93498886:+	-0.546581	-0.940239	-2.91367	0.00366095	0.0409782	-2.07508	ENSG00000048828	FAM120A	GBA_Control_v_Control	0.3191333634688801	-3.00836	0.5079262344882018	0.6116331016584042	0.937919	-5.43077
2:135675331-135680324:+	-0.666574	-1.90325	-2.89393	0.00389687	0.0427614	-2.07593	ENSG00000048991	R3HDM1	GBA_Control_v_Control	0.00936464	-0.912932	0.0350889	0.9720168468778583	0.9964404752602921	-5.49347
14:73147794-73173707:+	-0.520063	-1.9816	-2.88941	0.00395275	0.0427614	-2.08305	ENSG00000080815	PSEN1	GBA_Control_v_Control	0.0962554	1.4689355518008036	0.15024727012719466	0.8806041632356971	0.9826798758222193	-5.5186
2:233449981-233452060:+	-0.528482	-2.00428	-2.88209	0.00404493	0.0429838	-2.10028	ENSG00000077044	DGKD	GBA_Control_v_Control	-0.122365	1.2718515645315325	-0.451694	0.6516011035399858	0.9529980119380987	-5.42962
18:56756582-56758953:+	-0.529302	-2.24071	-2.87227	0.00417165	0.0437762	-2.11779	ENSG00000091157	WDR7	GBA_Control_v_Control	-0.256001	2.4077680666300925	-0.762226	0.44613076028731335	0.8946831700325871	-5.29278
1:31915894-31919658:-	-0.731147	-1.23011	-2.88699	0.00398374	0.0427614	-2.12289	ENSG00000269967,ENSG00000184007	AL136115.2,PTP4A2	GBA_Control_v_Control	0.0561686	3.176349135759099	0.1156062669481798	0.907991	0.9869370526719986	-5.55952
5:139363758-139364743:+	-0.778207	-2.91473	-2.85288	0.00443269	0.045645744115518694	-2.15658	ENSG00000120727	PAIP2	GBA_Control_v_Control	-1.26093	3.3754512350488772	-1.71555	0.0865987	0.6861287250513269	-4.29758
15:100564691-100565265:-	-0.866938	-2.98845	-2.83044	0.00475369	0.0469497	-2.21207	ENSG00000140471	LINS1	GBA_Control_v_Control	-0.273176	-0.160513	-0.50873	0.6110697829731391	0.937919	-5.39826
21:36247516-36248568:+	-0.911137	-0.560127	-2.8659	0.00425809	0.0441317	-2.21474	ENSG00000142197	DOP1B	GBA_Control_v_Control	-0.509437	-0.19165	-2.04795	0.0408631	0.641135	-3.74674
12:45926141-45928859:-	-0.379608	-0.518654	-2.87342	0.0041566	0.0437762	-2.21509	ENSG00000139218	SCAF11	GBA_Control_v_Control	0.12084998613584103	3.5174136070671778	0.6545391271634554	0.5129364671381671	0.9210556552849787	-5.39068
14:74669648-74671483:-	-0.665694	-2.51136	-2.83252	0.00472189	0.0469115	-2.21753	ENSG00000119682	AREL1	GBA_Control_v_Control	0.11526027006379191	0.737149	0.19540084035160998	0.845125	0.9821086447545352	-5.48961
22:29978441-29998857:+	-0.577684	-2.21357	-2.83625	0.00466764	0.0469115	-2.21954	ENSG00000100330	MTMR3	GBA_Control_v_Control	0.0676308	2.1910847945609038	0.1033550420308552	0.9177048778046282	0.9883428414586085	-5.54298
5:94643272-94654752:+	-0.820649	-3.14117	-2.82479	0.00483709	0.047494	-2.22798	ENSG00000133302	SLF1	GBA_Control_v_Control	-0.59192	-1.15555	-1.17784	0.23917935082063968	0.8307451706813072	-4.93741
7:156826604-156836885:-	-0.496539	-1.49315	-2.83985	0.00461579	0.0469115	-2.23399	ENSG00000105983	LMBR1	GBA_Control_v_Control	0.0382679	2.2761045444997112	0.1002862502352497	0.9201400484376866	0.9885407591470613	-5.53813
21:29321220-29329693:+	-0.391735	-0.427561	-2.86646	0.00424823	0.0441317	-2.23577	ENSG00000156273	BACH1	GBA_Control_v_Control	0.29946046709052354	5.048573840386179	0.865502	0.38700034945601225	0.8823077098619806	-5.26457
12:56670274-56673065:-	-0.70186	-3.13177	-2.81201	0.00503093	0.0487944	-2.2575	ENSG00000241217,ENSG00000110958	RN7SL809P,PTGES3	GBA_Control_v_Control	-0.745254	0.8399898373027794	-1.21807	0.223525	0.8070933572530429	-4.8839
16:69695135-69695379:+	-0.552565	-0.547199	-2.85099	0.00445855	0.045645744115518694	-2.25995	ENSG00000102908	NFAT5	GBA_Control_v_Control	0.04633	2.247275141017664	0.2109527291819276	0.8329732566592906	0.9821086447545352	-5.52717
8:99575657-99585517:+	-0.519779	-2.08002	-2.81958	0.00491473	0.047975765210941435	-2.27077	ENSG00000132549	VPS13B	GBA_Control_v_Control	-0.578302	1.3641512907744278	-1.18121	0.23783849563068923	0.8307451706813072	-4.93124
3:119500694-119513719:+	-0.592522	-2.60511	-2.8024	0.00518193	0.0487944	-2.29189	ENSG00000113845	TIMMDC1	GBA_Control_v_Control	0.14274862582491465	1.9378771115762885	0.2823805701592614	0.7777184987875057	0.9821086447545352	-5.49827
3:16286341-16303592:+	-0.583709	-2.8919	-2.79651	0.00527646	0.0487944	-2.30109	ENSG00000154814	OXNAD1	GBA_Control_v_Control	-0.917337	0.42721156839743324	-1.87608	0.0609772	0.648659	-4.03004
2:175979809-175995646:-	-0.63719	-2.04289	-2.80176	0.00519208	0.0487944	-2.31343	ENSG00000144320	LNPK	GBA_Control_v_Control	-0.945245	-2.08743	-1.68008	0.093298	0.6963735360482091	-4.34576
X:78014661-78020398:+	-0.736951	-1.84293	-2.80337	0.00516703	0.0487944	-2.31993	ENSG00000165240,ENSG00000102144	ATP7A,PGK1	GBA_Control_v_Control	0.10437854173268524	1.3269152012549315	0.23200027678025353	0.8165920518168279	0.9821086447545352	-5.49356
1:20775723-20776005:-	-0.563769	-0.252173	-2.83373	0.00470423	0.0469115	-2.32076	ENSG00000127483	HP1BP3	GBA_Control_v_Control	-0.0953571	2.3303667563783588	-0.334701	0.7379307803227446	0.969472	-5.50335
1:233198938-233208689:-	-0.563872	-2.89264	-2.78696	0.00543307	0.0487944	-2.32129	ENSG00000135749	PCNX2	GBA_Control_v_Control	-0.186786	-3.97141	-0.422853	0.6725071464273404	0.9579118935070294	-5.53038
1:70292387-70315566:-	-0.67198	-2.69202	-2.78891	0.0054008	0.0487944	-2.32674	ENSG00000118454	ANKRD13C	GBA_Control_v_Control	0.9910919078641705	-1.02756	1.8362270172863941	0.0666633	0.648659	-4.09793
3:197814907-197820430:+	-0.732425	-2.13766	-2.79271	0.00533863	0.0487944	-2.33249	ENSG00000186001	LRCH3	GBA_Control_v_Control	0.9786198802073898	0.7431677027060636	1.6461205595926551	0.10009808419597485	0.7121384888349228	-4.37337
3:11358417-11380052:+	-0.436066	-1.74633	-2.79538	0.00529469	0.0487944	-2.34046	ENSG00000197548	ATG7	GBA_Control_v_Control	1.1653652432324217	-0.938461	1.6954416146762399	0.0903475	0.6963735360482091	-4.2988
X:118584734-118590302:+	-0.76697	-2.55408	-2.78058	0.00554057	0.0492202	-2.34948	ENSG00000147251	DOCK11	GBA_Control_v_Control	-1.09999	2.789619669838543	-1.72398	0.0850648	0.6837243181037749	-4.27804
17:61744431-61780401:-	-0.599868	-2.78882	-2.77668	0.00560635	0.0495424	-2.35338	ENSG00000136492	BRIP1	GBA_Control_v_Control	-0.303289	-0.914197	-0.858086	0.39107979882983757	0.8825577718216362	-5.18907
17:59353214-59353526:+	-0.358625	0.24971362506920416	-2.83361	0.00470593	0.0469115	-2.35505	ENSG00000175155	YPEL2	GBA_Control_v_Control	-0.203043	2.477707732518611	-1.6062	0.10859021211695358	0.730176	-4.45344
1:155675009-155679512:-	-0.604156	-1.594	-2.78687	0.00543451	0.0487944	-2.37637	ENSG00000163374	YY1AP1	GBA_Control_v_Control	1.2844983366242575	-0.993291	1.876612604694072	0.060903851811026206	0.648659	-4.03816
1:171568246-171575128:+	-0.618239	-1.13105	-2.79805	0.00525171	0.0487944	-2.38292	ENSG00000117523	PRRC2C	GBA_Control_v_Control	-0.700721	1.9207981385162058	-2.53863	0.011300877701943697	0.4640552493031974	-2.81296
6:97267871-97273062:-	-0.57793	-2.43631	-2.76915	0.00573653	0.0501063	-2.38408	ENSG00000146263	MMS22L	GBA_Control_v_Control	-0.0870201	-3.0843	-0.180939	0.8564574912853297	0.9821086447545352	-5.55131
13:41466822-41468838:+	-0.668045	-2.70397	-2.76459	0.0058166	0.0503405	-2.38827	ENSG00000102760	RGCC	GBA_Control_v_Control	-1.03335	2.6109096438133035	-1.86479	0.0625461	0.648659	-4.06317
8:100287500-100288267:-	-0.461033	-0.956892	-2.7948	0.00530423	0.0487944	-2.39123	ENSG00000034677	RNF19A	GBA_Control_v_Control	-0.0455967	1.4733272739602137	-0.137474	0.8906877482228077	0.9837948889599599	-5.51322
10:45975453-45988847:+	-0.844452	-3.07954	-2.75786	0.00593795	0.0511272	-2.39841	ENSG00000265733,ENSG00000265354	SNORA74C-1,TIMM23	GBA_Control_v_Control	-1.27845	-0.0762707	-1.9221	0.0549175	0.648659	-3.9631
9:93471140-93476338:+	-0.624094	-2.04993	-2.76782	0.00575969	0.0501063	-2.40286	ENSG00000048828	FAM120A	GBA_Control_v_Control	0.36246253313459986	1.5402965086075922	0.836898	0.40287865927587363	0.8827087649054147	-5.23052
12:46229152-46243314:-	-0.682435	-0.524073	-2.79219	0.00534785	0.0487944	-2.41445	ENSG00000274591,ENSG00000111371	AC025031.3,SLC38A1	GBA_Control_v_Control	-0.0782254	3.3377304490179966	-0.138976	0.8895010974232949	0.9837948889599599	-5.5622
11:14771936-14789242:+	-0.494407	-0.926539	-2.78426	0.00547808	0.0489239	-2.41757	ENSG00000152270	PDE3B	GBA_Control_v_Control	0.0899219	3.9019288843274316	0.6336112945041155	0.5265000457100122	0.9210556552849787	-5.40768
2:144208602-144211579:-	-0.650814	-2.26553	-2.75503	0.00598781	0.0512935	-2.42651	ENSG00000121964	GTDC1	GBA_Control_v_Control	0.4907756366860694	1.8708843844858827	1.0035128564683866	0.31589093545584584	0.8559777364617792	-5.10325
19:47264602-47264946:+	-0.384556	0.0512695	-2.80096	0.00520488	0.0487944	-2.43215	ENSG00000105321	CCDC9	GBA_Control_v_Control	0.0825367	1.274075578317938	0.4263996808127473	0.6699214717425347	0.9579118935070294	-5.43982
6:158312050-158314268:+	-0.428951	-0.987362	-2.77106	0.00570327	0.0501063	-2.44943	ENSG00000130338,ENSG00000274023	TULP4,AL360169.2	GBA_Control_v_Control	-0.0979357	2.190413437315235	-0.494119	0.6213463764246134	0.937919	-5.43692
12:29293299-29297200:+	-0.581722	-2.34447	-2.73149	0.00642886	0.053970261591845134	-2.47728	ENSG00000064763	FAR2	GBA_Control_v_Control	-0.505829	0.9909630695790992	-0.980274	0.32722206760700456	0.8605768339808534	-5.10427
3:51541497-51552063:+	-1.02674	1.2889546943338157	-2.80348	0.00516773	0.0487944	-2.48787	ENSG00000164080	RAD54L2	GBA_Control_v_Control	-0.43937	0.041693	-1.29391	0.19603680786905348	0.8007786065832116	-4.797
3:16301625-16302748:+	-0.652248	-1.20235	-2.74501	0.00617252	0.0523417	-2.49983	ENSG00000154814	OXNAD1	GBA_Control_v_Control	0.26679156870001774	4.531756868274569	0.677088	0.4985289349022305	0.9102302281357044	-5.38603
5:10415487-10417404:+	-0.429869	-1.38134	-2.73799	0.00630426	0.0531902	-2.50172	ENSG00000145495	MARCHF6	GBA_Control_v_Control	0.678817	1.1650500044099288	1.0003760263401937	0.31740516039538247	0.8559777364617792	-5.10502
1:179043714-179054638:+	-0.612344	-3.18852	-2.7124	0.00680783	0.0561299	-2.50922	ENSG00000116199	FAM20B	GBA_Control_v_Control	-0.499602	-0.325331	-0.957422	0.33861890767392544	0.8605768339808534	-5.11648
3:8935870-8941804:-	-0.417635	-0.871076	-2.74755	0.00612491	0.0522017	-2.52347	ENSG00000070950	RAD18	GBA_Control_v_Control	0.24745769767721804	0.5863934593359003	0.8824466637578662	0.37777758577038933	0.8823077098619806	-5.17707
7:32874706-32875157:-	-0.586956	-2.89067	-2.70496	0.00696089	0.0566294	-2.53128	ENSG00000170852	KBTBD2	GBA_Control_v_Control	-0.265031	2.0385462738059617	-0.50596	0.6130123518323991	0.937919	-5.42774
9:128508875-128515639:+	-0.571931	-2.54784	-2.70891	0.00687943	0.0563442	-2.53239	ENSG00000119392	GLE1	GBA_Control_v_Control	-0.184079	0.8604800996541574	-0.391866	0.6952527169516581	0.9631176654860899	-5.44144
7:152309965-152315338:-	-0.678316	-3.13313	-2.69889	0.00708818	0.0570478	-2.54638	ENSG00000055609	KMT2C	GBA_Control_v_Control	-1.25482	-1.36322	-1.52516	0.1275817108221244	0.7489849387075066	-4.53899
7:27629370-27649633:-	-0.612078	-3.15973	-2.69618	0.00714562	0.057130906551488704	-2.5505	ENSG00000106049	HIBADH	GBA_Control_v_Control	-0.233719	-0.539979	-0.434926	0.6637233487244454	0.9579118935070294	-5.42501
2:201407402-201420706:-	-0.589429	-3.09479	-2.69439	0.00718375	0.0571636	-2.55736	ENSG00000115993,ENSG00000213090	TRAK2,SCYL2P1	GBA_Control_v_Control	-0.620995	0.0685482	-1.01036	0.3126033105184225	0.8559777364617792	-5.07025
3:5174016-5174414:+	-0.75439	-1.98838	-2.70402	0.00698171	0.0566294	-2.56179	ENSG00000134108	ARL8B	GBA_Control_v_Control	-0.379399	1.8917360985125626	-0.878523	0.3799013698531061	0.8823077098619806	-5.20039
16:31722625-31723353:+	-0.453989	-1.13082	-2.71182	0.00681983	0.0561299	-2.58969	ENSG00000197302	ZNF720	GBA_Control_v_Control	-0.151425	1.8663252229397633	-0.971134	0.3317497859556414	0.8605768339808534	-5.13122
20:3945176-3974400:-	-0.632237	-1.73185	-2.69827	0.00710124	0.0570478	-2.59002	ENSG00000101236	RNF24	GBA_Control_v_Control	-0.610694	2.3692118525437587	-1.17563	0.2400632220462348	0.8307451706813072	-4.95831
9:19070218-19096769:-	-0.594429	-2.4895	-2.67807	0.00754052	0.0594391	-2.61054	ENSG00000147874	HAUS6	GBA_Control_v_Control	0.114295	-0.70054	0.22797190576937373	0.8197213479777914	0.9821086447545352	-5.47328
8:47953619-47957431:-	-0.597532	-2.24311	-2.67467	0.00761678	0.0597597	-2.62724	ENSG00000253729	PRKDC	GBA_Control_v_Control	-0.335234	2.2624776853068798	-0.752385	0.45202175234214337	0.8979383035689463	-5.29433
1:155853275-155853806:-	-0.691681	-2.42987	-2.66732	0.00778413	0.0602791	-2.64035	ENSG00000116580	GON4L	GBA_Control_v_Control	-0.733284	2.1530392669830136	-1.50464	0.13277848413362198	0.7579362983130947	-4.57387
4:104518576-104519454:-	-0.509623	-0.115012	-2.71636	0.00672758	0.0559188	-2.64737	ENSG00000245384	CXXC4-AS1	GBA_Control_v_Control	-0.206893	-2.58143	-1.02433	0.30596308180956894	0.8559777364617792	-5.08689
7:6037423-6039035:-	-0.603889	-3.11923	-2.65669	0.00803174	0.0604709	-2.64751	ENSG00000086232	EIF2AK1	GBA_Control_v_Control	0.13334643391767464	-3.16941	0.2681455629336044	0.7886504825571958	0.9821086447545352	-5.54431
5:50399106-50411383:-	-0.55992	0.4995378344601839	-2.72402	0.00657532	0.0549252	-2.65763	ENSG00000170571	EMB	GBA_Control_v_Control	1.3889615191670242	-3.70284	2.161703862343449	0.0309116	0.610344	-3.56501
5:43675510-43704400:+	-0.558013	-2.3912	-2.65969	0.00796095	0.0602791	-2.65767	ENSG00000112992	NNT	GBA_Control_v_Control	0.00882359	0.854644	0.020183443708122834	0.9839016371435955	0.9971506702600866	-5.50665
16:30499073-30499489:+	-0.678463	-2.32278	-2.65931	0.00797019	0.0602791	-2.66144	ENSG00000005844	ITGAL	GBA_Control_v_Control	-1.12472	1.368663605694218	-1.99226	0.046653	0.641135	-3.85106
12:57946994-57953689:+	-0.673121	-2.77985	-2.65193	0.00814492	0.0604709	-2.66543	ENSG00000166896	ATP23	GBA_Control_v_Control	-0.726605	-0.992753	-2.03925	0.0417248	0.641135	-3.76866
6:136694139-136698682:-	-0.59769	-2.40169	-2.65433	0.00808763	0.0604709	-2.67364	ENSG00000197442	MAP3K5	GBA_Control_v_Control	0.17589394871723418	-1.8132	0.2225226511327966	0.8239589779093932	0.9821086447545352	-5.48806
14:53156242-53189936:+	-0.555882	-2.74524	-2.64839	0.00822987	0.0606051	-2.67592	ENSG00000237356,ENSG00000258731	AL365295.1,AL356020.1	GBA_Control_v_Control	-0.0751797	-2.48852	-0.259497	0.7953125304516367	0.9821086447545352	-5.52039
6:42659655-42666245:+	-0.547088	-2.10084	-2.6527	0.00812638	0.0604709	-2.69641	ENSG00000024048,ENSG00000206848	UBR2,RNU6-890P	GBA_Control_v_Control	-0.900121	-0.144295	-1.13706	0.25582515334413997	0.842534	-4.95613
12:32598496-32611283:+	-0.50987	-1.07213	-2.66989	0.00772501	0.0602791	-2.69763	ENSG00000139132	FGD4	GBA_Control_v_Control	1.6930034558786853	-2.07014	2.618181183533831	0.00899278	0.4313966323112436	-2.64148
22:43039779-43046573:-	-0.601328	-2.5792	-2.63697	0.00851007	0.0613731	-2.70478	ENSG00000100271	TTLL1	GBA_Control_v_Control	-0.417138	-1.42906	-1.20131	0.22995704698233874	0.8213143423735432	-4.90322
1:172555868-172557794:+	-0.573252	-1.71202	-2.65065	0.00817563	0.0604709	-2.70939	ENSG00000094975	SUCO	GBA_Control_v_Control	0.5961859047251505	-4.24238	1.2291400804477304	0.2193590796756663	0.8059861096765057	-4.95416
9:109050282-109050692:-	-0.459595	-1.10932	-2.66145	0.0079199	0.0602791	-2.71706	ENSG00000106771	TMEM245	GBA_Control_v_Control	0.7879508780394804	-1.40841	1.5547604295127453	0.12036477554619805	0.7357016639037067	-4.48743
1:110891391-110892533:+	-0.546248	-2.10017	-2.63806	0.00848277	0.0613731	-2.72182	ENSG00000143119	CD53	GBA_Control_v_Control	-0.605113	6.549294999119959	-1.29303	0.19634250871874187	0.8007786065832116	-4.86492
5:131677702-131709272:-	-0.414003	-1.13198	-2.66487	0.00784034	0.0602791	-2.72229	ENSG00000273217,ENSG00000217128	AC008695.1,FNIP1	GBA_Control_v_Control	0.26245648538716093	1.477986823349706	0.4107812741150187	0.6813335108448441	0.9579118935070294	-5.46385
2:147896300-147899898:+	-0.64784	-1.83692	-2.6367	0.00851693	0.0613731	-2.7339	ENSG00000121989	ACVR2A	GBA_Control_v_Control	-0.200413	0.19250290564226105	-0.720388	0.47147817265718606	0.8996202637244488	-5.28191
10:31373017-31387266:+	-0.687956	-2.57023	-2.62585	0.00879099	0.0620171	-2.73753	ENSG00000148516	ZEB1	GBA_Control_v_Control	-0.946953	1.26553	-1.61983	0.10562871169466104	0.730176	-4.41113
11:121045673-121060085:+	-0.421312	0.0229692	-2.68054	0.00748535	0.0592826	-2.7521	ENSG00000285509,ENSG00000154114	TBCEL-TECTA,TBCEL	GBA_Control_v_Control	0.7338495481077176	0.0194971	1.258319056415675	0.20861208326310568	0.8059861096765057	-4.8419
17:62033786-62035608:-	-0.602983	-1.81322	-2.62898	0.00871102	0.0619738	-2.75708	ENSG00000108510	MED13	GBA_Control_v_Control	0.42251241364281533	1.4137903200333755	0.956703	0.33898166583206957	0.8605768339808534	-5.13491
1:13730999-13749487:+	-0.512643	-2.1156	-2.61833	0.0089853	0.0628597	-2.76991	ENSG00000116731	PRDM2	GBA_Control_v_Control	0.17526377893095624	-2.90497	0.31866142609118775	0.750059	0.9780466802947511	-5.48824
18:12999420-13030608:+	-0.366626	-0.252727	-2.66	0.00795375	0.0602791	-2.78331	ENSG00000101639	CEP192	GBA_Control_v_Control	0.3988412124993417	-1.25647	0.7215930738973048	0.4707374912035931	0.8996202637244488	-5.28039
13:41811224-41819386:-	-0.600751	-2.79126	-2.60306	0.00939246	0.0646309	-2.78405	ENSG00000102763	VWA8	GBA_Control_v_Control	-0.168191	1.0699403821226863	-0.342231	0.732259	0.9673821440412214	-5.4624
10:87894024-87895777:+	-0.481441	-1.06807	-2.63325	0.00860301	0.061728408026358136	-2.79318	ENSG00000171862	PTEN	GBA_Control_v_Control	-0.240548	4.852507625181928	-0.833963	0.4045292111426989	0.8827087649054147	-5.28643
5:177041125-177050936:+	-0.561258	-3.1369	-2.59609	0.00958374	0.065411	-2.79478	ENSG00000113761	ZNF346	GBA_Control_v_Control	0.1374086083180428	-0.454072	0.2357470787617746	0.8136841082067624	0.9821086447545352	-5.4738
11:3731390-3731578:-	-0.55214	-2.8557	-2.59451	0.00962757	0.0654441	-2.8012	ENSG00000110713	NUP98	GBA_Control_v_Control	-1.52487	1.311586549483067	-2.47587	0.013479420194379643	0.5143624205991686	-2.94445
22:31447425-31450360:-	-0.462855	-1.97128	-2.61068	0.00918723	0.0640057	-2.8027	ENSG00000184708	EIF4ENIF1	GBA_Control_v_Control	-0.191117	0.7956860191504644	-0.895892	0.37055699670294673	0.880588	-5.16731
13:49451552-49467960:+	-0.603327	-2.90283	-2.5854	0.00988364	0.0663096	-2.82749	ENSG00000136169	SETDB2	GBA_Control_v_Control	-0.55781	0.7106863103954854	-1.14065	0.25432923282564074	0.842534	-4.96613
5:56864733-56865977:+	-0.538256	-0.107314	-2.64507	0.00831067	0.0609329	-2.83073	ENSG00000095015	MAP3K1	GBA_Control_v_Control	1.004676048691429	3.3121684003253002	2.2671410588566707	0.023624880955656857	0.5748721032543168	-3.37253
20:37066723-37068186:-	-0.626928	-2.21546	-2.59117	0.00972079	0.0658113	-2.8332	ENSG00000080839	RBL1	GBA_Control_v_Control	0.3062339545551893	-2.06103	0.8751846008114277	0.38171366412578656	0.8823077098619806	-5.20045
12:124419956-124430787:-	-0.476066	-2.24079	-2.58667	0.00984767	0.0663096	-2.84064	ENSG00000196498	NCOR2	GBA_Control_v_Control	0.18635880795711834	0.7674956170609871	0.4001690452558243	0.68913	0.9618027945296177	-5.44363
4:102714437-102726683:-	-0.44923	0.17841520305321268	-2.63791	0.00848672	0.0613731	-2.85393	ENSG00000109323	MANBA	GBA_Control_v_Control	-0.703289	-4.52696	-1.46811	0.1424841720724035	0.7727919682936442	-4.70236
6:154773988-154795139:+	-0.506873	-2.06468	-2.58437	0.00991287	0.0663096	-2.85953	ENSG00000213079	SCAF8	GBA_Control_v_Control	-0.233648	0.22905549194850316	-0.34247	0.7320792056379466	0.9673821440412214	-5.45221
17:4282797-4296814:-	-0.516202	-1.22695	-2.59707	0.0095565	0.065411	-2.87548	ENSG00000132388	UBE2G1	GBA_Control_v_Control	0.3406876677477273	2.6214345626182713	1.1476548036446066	0.2514247390254565	0.842534	-4.99375
5:132883339-132885119:-	-0.515252	-2.93823	-2.55946	0.010646755068935964	0.0692864	-2.88089	ENSG00000072364	AFF4	GBA_Control_v_Control	-0.934275	1.6411044935977874	-2.03165	0.042490576394124055	0.641135	-3.78498
6:131145284-131169273:+	-0.48061	-0.810266	-2.60529	0.00933202	0.0644792	-2.88484	ENSG00000118507	AKAP7	GBA_Control_v_Control	0.0848014	-2.67008	0.21492673485828132	0.8298745277493009	0.9821086447545352	-5.51561
18:76849525-76851939:+	-0.792107	-2.10518	-2.56714	0.010418310076988107	0.0683295	-2.8986	ENSG00000130856	ZNF236	GBA_Control_v_Control	-1.41593	-0.711471	-2.88153	0.00405425	0.3283825104480537	-2.04171
10:124942456-124943307:+	-0.409389	0.17905068900404164	-2.62034	0.00893303	0.0627555	-2.91392	ENSG00000249456,ENSG00000019995	AL731577.2,ZRANB1	GBA_Control_v_Control	0.8053266128096901	0.23435762324714834	1.2205079454338648	0.22260122489022488	0.8059861096765057	-4.88333
3:155833467-155842619:-	-0.467712	-1.81668	-2.56533	0.010469482271059642	0.0683979	-2.91417	ENSG00000284952,ENSG00000169359	AC104472.3,SLC33A1	GBA_Control_v_Control	0.7598949040543062	-3.075	1.2938011592740242	0.19607555447194652	0.8007786065832116	-4.82307
10:68468122-68470163:-	-0.606612	-2.60999	-2.54978	0.010944857324790192	0.0704077	-2.91992	ENSG00000138346	DNA2	GBA_Control_v_Control	-0.494184	-2.81503	-1.30158	0.19340319110161958	0.8007786065832116	-4.81776
2:239990073-240007370:-	-0.521597	-2.43675	-2.55015	0.010933186178174716	0.0704077	-2.92412	ENSG00000130414	NDUFA10	GBA_Control_v_Control	-0.510111	2.3029422751675255	-1.12009	0.2629815071588575	0.84418	-5.01062
21:29326058-29329693:+	-0.635696	-3.08993	-2.54302	0.011157238793165228	0.0706906	-2.92489	ENSG00000156273	BACH1	GBA_Control_v_Control	-0.971271	0.00854081	-1.3039	0.19261013860478027	0.8007786065832116	-4.79342
1:29035825-29053312:+	-0.612621	-2.65159	-2.53848	0.011302052187761038	0.0710717	-2.9475	ENSG00000277958,ENSG00000159023	Metazoa_SRP,EPB41	GBA_Control_v_Control	-1.13953	0.6922399287868323	-1.22648	0.2203491123375696	0.8059861096765057	-4.88268
1:65364634-65366196:+	-0.41085	2.50428	-2.66015	0.00795032	0.0602791	-2.94833	ENSG00000116675	DNAJC6	GBA_Control_v_Control	-0.38564	0.14617253849209608	-1.10034	0.27148670324396307	0.84418	-4.98927
1:185214506-185231708:+	-0.455365	1.245816534503049	-2.62718	0.00875674	0.0620171	-2.95846	ENSG00000116668	SWT1	GBA_Control_v_Control	-0.261797	-0.425399	-0.66245	0.5078571060281512	0.9184537997368243	-5.30769
13:21400372-21421164:-	-0.536658	-2.6091	-2.53051	0.011559943252637544	0.0715498	-2.96166	ENSG00000180776	ZDHHC20	GBA_Control_v_Control	0.18812113937033725	-2.71584	0.3164876226690667	0.751708	0.97851	-5.50802
20:62139074-62140944:-	-0.487578	-1.76206	-2.54352	0.0111413	0.0706906	-2.9636	ENSG00000101182	PSMA7	GBA_Control_v_Control	-0.711909	4.648459024990981	-2.08466	0.037389750748052605	0.6278743191681722	-3.71218
14:99458278-99465813:-	-0.564229	0.6998478573186573	-2.60734	0.00927827	0.0643728	-2.96503	ENSG00000183576	SETD3	GBA_Control_v_Control	0.25985584808341056	2.674464439208561	0.8216696364354787	0.4114887667105266	0.8827087649054147	-5.26523
5:43161248-43161931:+	-0.623842	-3.12633	-2.52697	0.011676374534946214	0.0715498	-2.96511	ENSG00000172262	ZNF131	GBA_Control_v_Control	-0.467292	0.12885727744358705	-0.889584	0.3739339705748559	0.8823077098619806	-5.17645
7:131375423-131399433:+	-0.513847	-0.675551	-2.57507	0.010181583385612968	0.0673027	-2.96579	ENSG00000128585	MKLN1	GBA_Control_v_Control	0.3975264559520735	-3.0508	0.5881260240119046	0.556599	0.9283558963272281	-5.39715
12:96323947-96334865:-	-0.609587	-2.52018	-2.52887	0.011613773510053845	0.0715498	-2.96714	ENSG00000059758	CDK17	GBA_Control_v_Control	-0.292791	2.25355	-0.573114	0.5667149215854834	0.9328572091588496	-5.39042
1:113834909-113855049:-	-0.654789	-2.32462	-2.53073	0.011553033211125894	0.0715498	-2.96939	ENSG00000134242	PTPN22	GBA_Control_v_Control	-0.714016	-1.3736	-1.88008	0.0604298	0.648659	-4.02548
15:65752378-65756472:-	-0.48703	-1.34645	-2.55608	0.010749968805090025	0.069688	-2.97121	ENSG00000174485	DENND4A	GBA_Control_v_Control	-0.912786	-0.89541	-1.8537	0.0641185	0.648659	-4.06133
8:130236921-130358143:-	-0.468824	-2.2544	-2.52752	0.011658074965916823	0.0715498	-2.98176	ENSG00000153317	ASAP1	GBA_Control_v_Control	-0.40787	1.3554560460617144	-0.959401	0.3376216953942712	0.8605768339808534	-5.12937
7:100355142-100355804:+	-0.514979	-1.26488	-2.54463	0.011106393567558437	0.0706906	-2.98762	ENSG00000121716,ENSG00000272752	PILRB,STAG3L5P-PVRIG2P-PILRB	GBA_Control_v_Control	-0.297855	1.8775191505101319	-1.12347	0.2615461956660859	0.84418	-4.99716
6:57152220-57161152:+	-0.439239	-0.234738	-2.57624	0.010147468374273291	0.0673027	-2.99329	ENSG00000112200	ZNF451	GBA_Control_v_Control	-0.461504	-0.264299	-0.997674	0.3187134019612565	0.8559777364617792	-5.08192
2:233388256-233398449:+	-0.593035	-2.87816	-2.51206	0.012177682415030703	0.0731376	-2.99482	ENSG00000077044	DGKD	GBA_Control_v_Control	-0.218063	-1.90223	-0.529203	0.5967990330549998	0.937919	-5.40642
4:37631384-37638504:-	-0.326443	2.140404595310898	-2.62951	0.00869752	0.0619738	-3.00393	ENSG00000181826	RELL1	GBA_Control_v_Control	0.637102	0.5060224640540828	1.1221207817584133	0.2621189473946315	0.84418	-4.98427
4:128992166-129003876:-	-0.530788	-0.232563	-2.57077	0.010307983214100739	0.067871	-3.00575	ENSG00000151466	SCLT1	GBA_Control_v_Control	0.530377	2.918546488581389	1.671978711208983	0.094886	0.6963735360482091	-4.36656
10:84371013-84373815:+	-0.60383	-3.16419	-2.50555	0.012402706724430812	0.0731376	-3.00788	ENSG00000107771	CCSER2	GBA_Control_v_Control	-0.632098	1.032075542046435	-1.03227	0.30223272844903254	0.8553046509813077	-5.06615
5:176350612-176355749:-	-0.527631	-3.02572	-2.50474	0.0124309	0.0731376	-3.01257	ENSG00000122203	KIAA1191	GBA_Control_v_Control	-0.917717	0.426118	-1.95028	0.0514615	0.648659	-3.91413
3:196391812-196403019:-	-0.72524	-1.34001	-2.53081	0.011552866160018733	0.0715498	-3.01872	ENSG00000206644,ENSG00000163960,ENSG00000241868	RNU6-1279P,UBXN7,RN7SL434P	GBA_Control_v_Control	0.0676386	2.6173739713313977	0.1662611267002764	0.8679898703366934	0.9821086447545352	-5.53447
2:147972738-147982081:-	-0.537834	-1.39088	-2.53111	0.0115404	0.0715498	-3.02045	ENSG00000115947	ORC4	GBA_Control_v_Control	0.5028058570809328	-0.113527	1.2367293988012986	0.21651943119590533	0.8059861096765057	-4.85665
1:93894613-93897898:-	-0.556525	-1.83434	-2.51665	0.0120214	0.07313	-3.02564	ENSG00000023909	GCLM	GBA_Control_v_Control	-0.266295	0.7986945270951937	-0.925025	0.35520762357596936	0.8699886924736928	-5.14538
7:100812746-100813208:-	-0.490096	-2.14694	-2.50461	0.012435243067464958	0.0731376	-3.03835	ENSG00000196411	EPHB4	GBA_Control_v_Control	-0.148561	-0.131721	-0.613868	0.5394621432553524	0.9210556552849787	-5.33638
17:42727634-42730918:-	-0.582763	-2.89646	-2.49231	0.012871370191438756	0.0747787	-3.04487	ENSG00000108799	EZH1	GBA_Control_v_Control	1.2631104966054352e-4	0.2871118968232968	2.0931423809422407e-4	0.9998330391174137	0.9998330391174137	-5.50214
1:41070594-41075451:-	-0.264455	0.6429879667672628	-2.57518	0.010178215381021915	0.0673027	-3.05241	ENSG00000010803	SCMH1	GBA_Control_v_Control	0.14466057161023382	-0.250479	1.0001857746124752	0.31749701560244487	0.8559777364617792	-5.07478
12:108652271-108654410:-	-0.529807	-0.371326	-2.54163	0.011201478539291232	0.0707041	-3.05897	ENSG00000110880	CORO1C	GBA_Control_v_Control	0.2477164931482312	3.2393036889481226	1.1079814782997486	0.26817416416626993	0.84418	-5.04174
9:37424844-37426654:+	-0.368368	-0.312216	-2.54319	0.011151669575485698	0.0706906	-3.06195	ENSG00000137106	GRHPR	GBA_Control_v_Control	-0.034422	2.7445777755659653	-0.159307	0.8734636215440796	0.9826798758222193	-5.55125
16:66608308-66610003:+	-0.361671	-1.33585	-2.51163	0.012192346737443419	0.0731376	-3.06738	ENSG00000140931	CMTM3	GBA_Control_v_Control	-0.286371	2.3523517425326728	-1.83999	0.0661076	0.648659	-4.10802
4:77773080-77776392:-	-0.548204	-1.52767	-2.50588	0.012391062157171572	0.0731376	-3.06936	ENSG00000138767	CNOT6L	GBA_Control_v_Control	-0.211899	2.8768762052558494	-0.505461	0.6133623029331834	0.937919	-5.44151
5:65988634-65994864:+	-0.649031	-1.67076	-2.50212	0.012523387347108755	0.073264	-3.06953	ENSG00000112851	ERBIN	GBA_Control_v_Control	-0.961001	2.910907345491232	-1.52876	0.12668489544188247	0.7473876706656397	-4.56256
3:71690009-71710484:-	-0.476644	-1.37215	-2.50671	0.012362343481096301	0.0731376	-3.07006	ENSG00000285708,ENSG00000163412	AC097634.4,EIF4E3	GBA_Control_v_Control	0.0835434	-5.16093	0.2498608623084482	0.8027820833099012	0.9821086447545352	-5.67166
6:89083752-89084643:+	-0.579924	-1.76731	-2.49744	0.012688	0.073969	-3.07086	ENSG00000146278	PNRC1	GBA_Control_v_Control	-0.37843	4.145391497229199	-0.806756	0.4200261408692807	0.8870740761251853	-5.28914
7:17868406-17897446:-	-0.500422	-2.34254	-2.48831	0.013016068747723342	0.0752666	-3.07218	ENSG00000071189	SNX13	GBA_Control_v_Control	0.31202731735843003	-2.25695	0.5205053535829424	0.6028430883873602	0.937919	-5.40598
16:89418283-89431326:-	-0.511716	-2.83047	-2.4768	0.013440184327448125	0.0770199	-3.07914	ENSG00000261692,ENSG00000167522	AC092120.1,ANKRD11	GBA_Control_v_Control	-0.818578	0.012170098847716668	-2.01871	0.0438217	0.641135	-3.79842
12:116096668-116111512:-	-0.588047	-2.80493	-2.47296	0.013584584897177515	0.0770199	-3.08795	ENSG00000123066	MED13L	GBA_Control_v_Control	-0.249218	2.167193079776559	-0.376207	0.7068543358604229	0.9633841297999743	-5.4728
3:152414940-152432920:+	-0.442035	-1.21837	-2.50396	0.012458223836741649	0.0731376	-3.09525	ENSG00000152601	MBNL1	GBA_Control_v_Control	0.12355921134006476	1.0942284962932294	0.17603661199451778	0.8603059158500866	0.9821086447545352	-5.50452
2:161179613-161204793:+	-0.610818	-3.01691	-2.46579	0.013857598692049318	0.0779778	-3.10501	ENSG00000136560	TANK	GBA_Control_v_Control	0.6336645072896783	0.6016167415449161	0.7446733811938596	0.4566691678790269	0.8992031284658809	-5.27907
4:89822245-89835692:-	0.5138673213745104	-2.12346	2.4749689783081785	0.013508968624745689	0.0770199	-3.11539	ENSG00000145335	SNCA	GBA_Control_v_Control	0.7470533472965997	5.565568776141665	0.7542941228074432	0.4508755970309344	0.8979383035689463	-5.33963
11:108172198-108177090:-	-0.500974	-3.25121	-2.45681	0.014206653525812683	0.0779778	-3.1155	ENSG00000149308	NPAT	GBA_Control_v_Control	0.9011245509641101	-2.82584	1.67632	0.0940334	0.6963735360482091	-4.35798
2:24135118-24147086:+	-0.607698	-2.95054	-2.46001	0.014081330074870732	0.0779778	-3.11602	ENSG00000276087,ENSG00000219626	AC008073.3,FAM228B	GBA_Control_v_Control	0.21541817865967028	-1.68313	0.6810786762953254	0.49600189741979284	0.9093255174783328	-5.33741
4:152411302-152469988:-	-0.533799	-2.93427	-2.4563	0.0142266	0.0779778	-3.12517	ENSG00000109670	FBXW7	GBA_Control_v_Control	-0.550087	1.2025553993510945	-1.01905	0.30846274573284094	0.8559777364617792	-5.07541
1:42265114-42278672:-	-0.581628	-2.83813	-2.45543	0.0142606	0.0779778	-3.13114	ENSG00000198815	FOXJ3	GBA_Control_v_Control	0.36241394512886504	-0.618407	0.504819	0.6138132473366824	0.937919	-5.39183
15:85113872-85115487:+	-0.740763	-1.83571	-2.47199	0.013624131958594693	0.0770199	-3.13289	ENSG00000073417	PDE8A	GBA_Control_v_Control	-0.861237	0.6538268313647292	-2.0805	0.037770535434213055	0.6278743191681722	-3.69415
8:141253988-141254629:-	-0.517862	0.12281824065431027	-2.52218	0.011835977543312221	0.072264	-3.13894	ENSG00000022567	SLC45A4	GBA_Control_v_Control	0.11492457487188856	2.1887372590427385	0.5561444615901434	0.5782542325473526	0.937919	-5.4149
17:47156912-47158303:-	-0.614414	-3.18939	-2.44605	0.014634758430210117	0.0788016	-3.14497	ENSG00000004897	CDC27	GBA_Control_v_Control	-0.535057	-1.1822	-0.841639	0.40022028253929065	0.8827087649054147	-5.20849
14:71413947-71418196:+	-0.557861	-3.19805	-2.44402	0.014716866309170351	0.0789038	-3.14564	ENSG00000197555	SIPA1L1	GBA_Control_v_Control	-0.0256772	-0.681907	-0.038828	0.9690363483348501	0.9964404752602921	-5.53017
9:109050282-109064567:-	-0.485226	-2.25234	-2.45656	0.014216278208603245	0.0779778	-3.14841	ENSG00000106771	TMEM245	GBA_Control_v_Control	0.0300266	1.6816140306166152	0.0800592	0.9362084746407804	0.9915398309595024	-5.51928
1:246591511-246591941:+	-0.59232	-3.05485	-2.44583	0.0146433	0.0788016	-3.14922	ENSG00000162852	CNST	GBA_Control_v_Control	0.12154362772409977	1.4067244485013595	0.2081422984287101	0.8351663035057282	0.9821086447545352	-5.50723
5:103096540-103097781:-	-0.580078	-2.19711	-2.45822	0.014151066591810898	0.0779778	-3.1503	ENSG00000145723	GIN1	GBA_Control_v_Control	-0.45688	-0.0326012	-1.5093	0.13158295689957916	0.7566020021725802	-4.54401
6:57124733-57134870:+	-0.666107	-3.09105	-2.44306	0.0147563	0.0789038	-3.15633	ENSG00000112200	ZNF451	GBA_Control_v_Control	-1.2192	0.5138907862057419	-1.97109	0.0490288	0.64312	-3.88047
1:247156405-247159813:-	-0.597696	-1.84918	-2.46257	0.0139819	0.0779778	-3.15763	ENSG00000196418	ZNF124	GBA_Control_v_Control	0.8658596675367358	0.5464052879427531	2.563540441147513	0.010527122252841428	0.4640552493031974	-2.76086
2:229858771-229880128:-	-0.396141	-2.01501	-2.45904	0.014118946129278944	0.0779778	-3.16219	ENSG00000153827	TRIP12	GBA_Control_v_Control	-0.402718	-1.56227	-0.496111	0.6199409538487413	0.937919	-5.42401
4:87195323-87195690:-	-0.627756	-1.90887	-2.45218	0.014390106791892518	0.0779778	-3.17057	ENSG00000145332	KLHL8	GBA_Control_v_Control	1.0186032396754507	1.4887497627505668	3.1447276083406135	0.00171853	0.3206015900558897	-1.3778
1:167951799-167975015:+	-0.602205	-2.829	-2.43395	0.015129595900365998	0.0798824	-3.17935	ENSG00000143164	DCAF6	GBA_Control_v_Control	0.4046695491325376	-1.40124	0.829563	0.40701212048217195	0.8827087649054147	-5.20506
4:139116648-139139497:-	-0.522958	-2.65471	-2.43411	0.015123204628143828	0.0798824	-3.18473	ENSG00000109381	ELF2	GBA_Control_v_Control	-0.201764	-4.11656	-0.393172	0.6942879510488832	0.9631176654860899	-5.55456
1:9931890-9934860:-	-0.645753	-2.85742	-2.43044	0.015276348645841332	0.0804044	-3.18599	ENSG00000162441	LZIC	GBA_Control_v_Control	-0.491438	0.5032978149911074	-0.881166	0.37846978028461664	0.8823077098619806	-5.18069
11:120473049-120477526:+	-0.538998	-1.75115	-2.45412	0.014312431059722684	0.0779778	-3.18993	ENSG00000196914	ARHGEF12	GBA_Control_v_Control	-0.0324195	1.1845653581048934	-0.0704966	0.9438145233707518	0.99352	-5.524
13:32535768-32537027:-	-0.531934	-3.08409	-2.42472	0.015516987901392682	0.080937	-3.19566	ENSG00000244754	N4BP2L2	GBA_Control_v_Control	-0.589704	3.417223530368774	-0.833571	0.40475002541086114	0.8827087649054147	-5.26075
5:72861807-72865729:+	-0.625513	-2.34512	-2.42836	0.015363408900526098	0.0806099	-3.20251	ENSG00000083312	TNPO1	GBA_Control_v_Control	-0.432793	1.3767156711428359	-0.632246	0.5273914942791184	0.9210556552849787	-5.35208
1:32279670-32280210:+	-0.501494	-1.64396	-2.43919	0.014913467766515049	0.0794912	-3.20969	ENSG00000182866	LCK	GBA_Control_v_Control	-0.0683258	4.876783923845797	-0.207349	0.835786	0.9821086447545352	-5.56602
15:65752378-65761438:-	-0.378813	0.9347372277423327	-2.51472	0.012086940044231085	0.0731376	-3.21293	ENSG00000174485	DENND4A	GBA_Control_v_Control	0.19264768702051782	-5.19778	0.6985944653890744	0.4851008048415061	0.904983	-5.48408
17:67928354-67929487:+	-0.554793	-2.53656	-2.4246	0.0155222	0.080937	-3.21298	ENSG00000171634	BPTF	GBA_Control_v_Control	0.10503607698674067	0.0621513	0.17871143161201475	0.8582056664709679	0.9821086447545352	-5.49022
2:214767481-214797117:-	-0.525201	-3.08916	-2.41392	0.015981816007488835	0.0823113	-3.21747	ENSG00000138376	BARD1	GBA_Control_v_Control	-0.193221	-3.73047	-0.423593	0.6719670003932467	0.9579118935070294	-5.54406
5:57246299-57251141:+	-0.398556	-0.00374833	-2.48751	0.013045019123121806	0.0752666	-3.22441	ENSG00000062194	GPBP1	GBA_Control_v_Control	0.34758227734714353	1.900808677053729	0.6892634714833008	0.4908402340730409	0.9086226604284848	-5.32781
2:175979809-175994280:-	-0.592383	-3.18768	-2.40976	0.016163949305874947	0.0829947	-3.22666	ENSG00000144320	LNPK	GBA_Control_v_Control	0.5598280770552959	-1.54662	0.9245461394299197	0.35545696428645224	0.8699886924736928	-5.15179
14:96833466-96860735:+	-0.408807	1.0601326241949989	-2.51033	0.012237337842234833	0.0731376	-3.23605	ENSG00000100749	VRK1	GBA_Control_v_Control	0.5145212527740726	-3.3957	0.9623353137618277	0.33614708654952197	0.8605768339808534	-5.1653
2:121605700-121606180:-	-0.467821	-2.30222	-2.40592	0.0163338	0.0833571	-3.25589	ENSG00000074054	CLASP1	GBA_Control_v_Control	0.0968993	3.5558348541492286	0.22717101771259676	0.820344	0.9821086447545352	-5.52851
14:32090501-32117287:+	-0.500963	-2.76498	-2.39941	0.0166251	0.0839607	-3.25598	ENSG00000100852	ARHGAP5	GBA_Control_v_Control	0.0885303	-0.173765	0.19465834552324057	0.8457056145619137	0.9821086447545352	-5.49026
6:35312301-35312772:+	-0.370819	0.15920334358780094	-2.4727	0.0135944	0.0770199	-3.25706	ENSG00000023892	DEF6	GBA_Control_v_Control	0.018179468398153098	4.3502335938070225	0.13116167893844985	0.8956775481999679	0.9839569195536666	-5.57885
9:14639895-14680162:-	-0.397981	-1.65532	-2.42033	0.0157046	0.0816346	-3.26012	ENSG00000175893	ZDHHC21	GBA_Control_v_Control	-0.313453	1.7673050946188325	-1.08522	0.2781239768115986	0.84418	-5.02367
2:37316236-37317179:-	-0.44903	-1.11695	-2.4358	0.015053132174377155	0.0798824	-3.2669	ENSG00000115825	PRKD3	GBA_Control_v_Control	-0.0821567	1.8536465718374309	-0.379647	0.7042998945132412	0.9633841297999743	-5.47343
2:40428472-40430301:-	-0.501722	-2.39615	-2.39963	0.016615291405325874	0.0839607	-3.26707	ENSG00000183023	SLC8A1	GBA_Control_v_Control	-0.665246	2.6957080297414007	-1.25684	0.2091452420501273	0.8059861096765057	-4.8724
19:1271328-1272051:+	-0.529116	-1.96631	-2.40772	0.0162539	0.0832019	-3.26894	ENSG00000099622	CIRBP	GBA_Control_v_Control	-0.0514527	5.3416243510713555	-0.0937579	0.9253229137062471	0.9901957757251683	-5.58063
10:35516522-35530243:+	-0.520564	-2.99021	-2.38757	0.017166526524977275	0.0860376	-3.2746	ENSG00000108100	CCNY	GBA_Control_v_Control	0.5983216116045558	2.7036583547483946	0.9442311099212791	0.3453122356714101	0.8638512846383748	-5.16102
3:170136418-170145521:-	-0.571112	-2.80004	-2.38765	0.017162844646575807	0.0860376	-3.28391	ENSG00000173889	PHC3	GBA_Control_v_Control	-0.909936	0.5833724930978708	-1.24729	0.21262565820884588	0.8059861096765057	-4.85254
7:64543706-64544432:-	-0.657866	-3.06601	-2.37922	0.0175589	0.0870671	-3.29365	ENSG00000173041	ZNF680	GBA_Control_v_Control	-0.410582	-0.844699	-0.884705	0.37655904417110886	0.8823077098619806	-5.19022
2:173954872-173956232:-	-0.412018	-1.36399	-2.41598	0.015892284659101263	0.082102	-3.29763	ENSG00000172845	SP3	GBA_Control_v_Control	-0.19171	5.104248123264927	-0.618301	0.5365381728182342	0.9210556552849787	-5.42118
18:47865058-47870564:-	-0.488036	-2.58001	-2.38424	0.017321926069307377	0.0865581	-3.29864	ENSG00000175387	SMAD2	GBA_Control_v_Control	-0.0769054	2.1927160121314273	-0.115329	0.9082107028534997	0.9869370526719986	-5.52588
16:53141178-53157541:+	-0.321632	0.023214975946687824	-2.45924	0.0141112	0.0779778	-3.30085	ENSG00000177200	CHD9	GBA_Control_v_Control	-0.269915	-1.97008	-0.848792	0.396229	0.8827087649054147	-5.20928
12:120557281-120560886:+	-0.542165	-2.49083	-2.37877	0.0175794	0.0870671	-3.31457	ENSG00000022840	RNF10	GBA_Control_v_Control	0.26068629362455553	0.7361525440707107	0.3188551594683484	0.7499124544852265	0.9780466802947511	-5.46894
6:158282262-158314268:+	-0.376537	-1.4011	-2.39881	0.016652114829051684	0.0839607	-3.32199	ENSG00000130338,ENSG00000274023	TULP4,AL360169.2	GBA_Control_v_Control	0.0873533	0.27587395804623477	0.438148	0.6613873454797756	0.9579118935070294	-5.41595
6:145888019-145894977:-	-0.598502	-2.95758	-2.36674	0.0181577	0.08868	-3.32573	ENSG00000146414	SHPRH	GBA_Control_v_Control	-0.232541	-0.678403	-0.427643	0.6690166390266294	0.9579118935070294	-5.4169
3:196062581-196077122:-	-0.512331	-3.14285	-2.36274	0.0183532	0.0887679	-3.33069	ENSG00000072274	TFRC	GBA_Control_v_Control	-0.093443	-2.04501	-0.157774	0.8746715165692706	0.9826798758222193	-5.53091
10:7797046-7802854:+	-0.451247	0.4329876824933531	-2.45198	0.014397331609928607	0.0779778	-3.33131	ENSG00000165629	ATP5F1C	GBA_Control_v_Control	-0.0048593	2.458057044690485	-0.0103316	0.9917590516518477	0.9990718280437094	-5.54973
7:151484736-151498180:-	-0.697601	-2.8822	-2.36345	0.018320597422148553	0.0887679	-3.33195	ENSG00000106615	RHEB	GBA_Control_v_Control	-0.140603	-0.566944	-0.219935	0.825973	0.9821086447545352	-5.47463
11:85996825-86031611:-	-0.352695	1.189968939762585	-2.47259	0.0135986	0.0770199	-3.33813	ENSG00000073921	PICALM	GBA_Control_v_Control	0.015459063929271877	-4.77229	0.030967885286476416	0.9753042930558529	0.996674	-5.67143
2:227491546-227524915:+	-0.50859	-3.13045	-2.35636	0.0186694	0.0887679	-3.33978	ENSG00000173744	AGFG1	GBA_Control_v_Control	-1.05934	1.7423741851580168	-1.67979	0.093355	0.6963735360482091	-4.33629
2:214767481-214781509:-	-0.496452	-2.02889	-2.37475	0.0177708	0.0877565	-3.34431	ENSG00000138376	BARD1	GBA_Control_v_Control	0.7869665189050954	-0.540369	1.8312836083458275	0.0673981	0.648659	-4.09656
10:124408541-124412200:-	-0.510464	-1.08199	-2.40244	0.016488805893353324	0.083893	-3.34511	ENSG00000065154	OAT	GBA_Control_v_Control	-0.305946	1.9370792926216265	-0.652055	0.5145370188339679	0.9210556552849787	-5.35264
1:20765376-20773610:-	-0.498643	-2.45405	-2.36396	0.0182936	0.0887679	-3.34605	ENSG00000127483	HP1BP3	GBA_Control_v_Control	-1.14605	-0.347539	-1.45042	0.1473007957586173	0.7801830791126765	-4.63522
8:99502835-99511512:+	-0.483152	-2.34094	-2.36666	0.018161426424749747	0.08868	-3.34959	ENSG00000132549	VPS13B	GBA_Control_v_Control	-0.062048	2.5950829225577188	-0.126625	0.8992665902202512	0.9845051366625526	-5.54935
3:179413411-179419505:-	-0.503179	-2.58375	-2.36022	0.0184779	0.0887679	-3.34964	ENSG00000114450	GNB4	GBA_Control_v_Control	-0.0412207	1.7314721975790934	-0.0833244	0.9336126397323392	0.9915398309595024	-5.51991
22:41135812-41140257:+	-0.521547	-2.12596	-2.36828	0.0180825	0.08868	-3.35069	ENSG00000100393	EP300	GBA_Control_v_Control	-0.257211	2.1403182294832304	-0.624238	0.5326338567891389	0.9210556552849787	-5.37429
7:80662989-80674147:+	-0.457462	-1.74546	-2.38197	0.017428489127006702	0.0868321	-3.35148	ENSG00000135218	CD36	GBA_Control_v_Control	1.2315043095824536	-1.17326	1.558917039024371	0.11937764943700076	0.7357016639037067	-4.48885
5:65567512-65572286:+	-0.762793	-2.72177	-2.35803	0.0185901	0.0887679	-3.35234	ENSG00000113593	PPWD1	GBA_Control_v_Control	-0.862273	1.410498247111459	-1.34711	0.17829297595235102	0.7994054950997603	-4.75257
5:139600371-139623461:+	-0.508895	-2.7772	-2.35671	0.018651944993743456	0.0887679	-3.35424	ENSG00000131508	UBE2D2	GBA_Control_v_Control	0.13275517680614612	-1.62978	0.19134034672885974	0.8483033472565922	0.9821086447545352	-5.47843
6:82214226-82214829:-	-0.591182	-2.92791	-2.35493	0.018741254328278955	0.0887679	-3.35448	ENSG00000005700	IBTK	GBA_Control_v_Control	0.8360380707656435	-0.943788	1.3949310832198965	0.16339064267680353	0.7871086807533572	-4.68212
1:20757165-20780540:-	-0.49084	-3.07062	-2.35264	0.018856375051798716	0.0889322	-3.35596	ENSG00000127483	HP1BP3	GBA_Control_v_Control	1.4101426911357686	-3.45711	2.3052572396538906	0.0213878	0.5440925100743605	-3.29481
22:21799011-21807846:-	-0.456456	-2.04759	-2.3665	0.018169106649537664	0.08868	-3.36318	ENSG00000100030	MAPK1	GBA_Control_v_Control	-0.0996035	0.24869563323273283	-0.132408	0.894692	0.9839569195536666	-5.49571
13:32732100-32735330:+	-0.51056	-2.94374	-2.34682	0.019151414980325705	0.0890726	-3.36535	ENSG00000083642	PDS5B	GBA_Control_v_Control	-0.838301	0.9933878020180597	-1.70063	0.0893679	0.6963735360482091	-4.29785
19:47362475-47362693:+	-0.55706	-2.65493	-2.34838	0.019072163932871696	0.0889505	-3.36929	ENSG00000134815	DHX34	GBA_Control_v_Control	-0.414077	1.5210442147615937	-0.826256	0.4088840441770699	0.8827087649054147	-5.23027
3:167695595-167725473:-	-0.575687	-3.1252	-2.34416	0.019287702137924304	0.0892123	-3.37448	ENSG00000114209	PDCD10	GBA_Control_v_Control	-0.0851269	0.8034908949355066	-0.122992	0.902142	0.984848	-5.50401
6:111262256-111263946:+	-0.559426	-2.40693	-2.34929	0.019025878784134396	0.0889505	-3.37734	ENSG00000173214	MFSD4B	GBA_Control_v_Control	-0.231875	1.9243034816821565	-0.520455	0.6028782224704636	0.937919	-5.40956
19:19640084-19640571:-	-0.539374	-1.79917	-2.35614	0.0186805	0.0887679	-3.3868	ENSG00000089639	GMIP	GBA_Control_v_Control	-0.296946	3.302319379909106	-0.781963	0.4344476010065095	0.8928243844429979	-5.30317
1:805798-810170:-	-0.927713	-2.2518	-2.35005	0.0189929	0.0889505	-3.38721	ENSG00000230092,ENSG00000230021	AL669831.4,AL669831.3	GBA_Control_v_Control	-0.0939673	-0.474828	-0.172496	0.8630876385915692	0.9821086447545352	-5.48831
12:88148287-88176319:+	-0.464927	-2.6643	-2.33732	0.019641866705752353	0.0899072	-3.39299	ENSG00000139324	TMTC3	GBA_Control_v_Control	-0.753871	0.47120407074814247	-1.85474	0.0639693	0.648659	-4.06275
13:37040404-37051583:-	-0.547846	-2.71971	-2.33713	0.019652135301794247	0.0899072	-3.39777	ENSG00000102710	SUPT20H	GBA_Control_v_Control	-0.191809	2.5344869681954796	-0.323805	0.7461628460106131	0.9764672006639279	-5.49755
10:45939360-45962994:-	-0.702112	-3.20044	-2.32829	0.0201209	0.0910375	-3.40626	ENSG00000239883	PARGP1	GBA_Control_v_Control	-0.114094	-1.07358	-0.188738	0.8503420182223587	0.9821086447545352	-5.50879
15:50300788-50301368:-	-0.522115	-2.44441	-2.32977	0.020039718552880205	0.090937	-3.41853	ENSG00000104064	GABPB1	GBA_Control_v_Control	-0.0858677	0.28533903478460615	-0.178363	0.858479	0.9821086447545352	-5.48476
12:71657525-71660427:-	-0.533339	-2.30959	-2.33069	0.0199911	0.090937	-3.42423	ENSG00000133858	ZFC3H1	GBA_Control_v_Control	-0.519709	-1.44951	-1.38773	0.16557400326026808	0.7871086807533572	-4.69888
9:83678440-83683066:-	-0.513749	-2.616	-2.32631	0.0202245	0.0910375	-3.4265	ENSG00000135018	UBQLN1	GBA_Control_v_Control	-0.229269	1.2365903020808378	-0.384829	0.7004572987911306	0.9631176654860899	-5.44986
10:17704430-17705741:+	-0.666436	-1.53267	-2.34884	0.019051474898840074	0.0889505	-3.42736	ENSG00000136738	STAM	GBA_Control_v_Control	-0.260248	1.4168858660701849	-0.75168	0.45244538702759296	0.8979383035689463	-5.27743
2:134253094-134254644:+	-0.542599	-3.04384	-2.31706	0.020725096260201466	0.0920723	-3.43061	ENSG00000152127	MGAT5	GBA_Control_v_Control	-0.483957	1.3978554194767132	-0.851983	0.39445663662390207	0.8827087649054147	-5.2098
16:47497398-47515601:+	-0.410382	-1.52906	-2.34577	0.019204950397457652	0.0890749	-3.43694	ENSG00000102893,ENSG00000222268	PHKB,RNA5SP425	GBA_Control_v_Control	-0.0695263	0.26422983412345125	-0.107311	0.9145669729831513	0.9869370526719986	-5.50162
5:137952627-137954376:-	-0.548667	-2.94952	-2.31538	0.0208171	0.0920723	-3.438	ENSG00000031003	FAM13B	GBA_Control_v_Control	-0.155745	0.9592021930891325	-0.275291	0.7831574246961328	0.9821086447545352	-5.47726
11:86000642-86031611:-	-0.483361	-2.57285	-2.31965	0.020584200664146513	0.0920723	-3.44503	ENSG00000073921	PICALM	GBA_Control_v_Control	0.12936935517168502	2.0484331852770232	0.14858390772228816	0.8819162105634791	0.9826798758222193	-5.52811
17:47137151-47143982:-	-0.491851	-2.53664	-2.3156	0.020805344356835193	0.0920723	-3.45186	ENSG00000004897	CDC27	GBA_Control_v_Control	-0.846518	-2.16874	-1.45253	0.1467132930640907	0.7795304400462288	-4.63653
1:28993329-29018442:+	-0.505716	-3.13029	-2.30596	0.021340720700781954	0.0929453	-3.45351	ENSG00000159023	EPB41	GBA_Control_v_Control	-0.275511	-1.14779	-0.294365	0.7685490625254776	0.9821086447545352	-5.48294
2:8908620-8958642:-	-0.437983	1.375885723161614	-2.41902	0.015760969644835008	0.0816749	-3.45403	ENSG00000143797	MBOAT2	GBA_Control_v_Control	0.5226807920713707	-4.63932	1.3910194002811485	0.1645870440063045	0.7871086807533572	-4.79553
7:6814763-6822364:-	-0.777477	-3.14793	-2.2974	0.021830295058085022	0.0937419	-3.46908	ENSG00000146574	CCZ1B	GBA_Control_v_Control	-1.02368	-1.82006	-2.04879	0.0407801	0.641135	-3.7596
4:38790069-38791231:-	-0.488711	-2.19313	-2.315	0.020838291083391962	0.0920723	-3.47035	ENSG00000174125	TLR1	GBA_Control_v_Control	-0.47911	2.87602	-1.18915	0.23470405786176632	0.8301708111794218	-4.95378
16:72088986-72090786:-	-0.551244	-2.65037	-2.29916	0.0217253	0.0935304	-3.47887	ENSG00000140830	TXNL4B	GBA_Control_v_Control	-0.227876	1.6778079432273718	-0.510925	0.6095328193112763	0.937919	-5.40742
20:37065423-37068186:-	-0.509221	-1.91018	-2.31756	0.020697681516393906	0.0920723	-3.48022	ENSG00000080839	RBL1	GBA_Control_v_Control	0.8779340099296878	-0.753968	1.76619	0.0777126	0.6675788786005744	-4.19386
16:71676446-71679535:-	-0.452284	-1.18104	-2.33972	0.0195173	0.0897794	-3.48083	ENSG00000040199	PHLPP2	GBA_Control_v_Control	0.41676119926901967	-4.04014	0.8877649847544449	0.37491116631824173	0.8823077098619806	-5.26356
21:39206107-39212707:-	-0.599404	-2.25653	-2.29997	0.021680067194681282	0.0935304	-3.49534	ENSG00000185658	BRWD1	GBA_Control_v_Control	0.0893088	1.8235235380269883	0.2107204762838856	0.8331544624328697	0.9821086447545352	-5.50392
16:30483826-30484263:+	-0.536119	-1.79233	-2.30489	0.021400580316250323	0.0929453	-3.49676	ENSG00000005844	ITGAL	GBA_Control_v_Control	-0.176096	-0.0793822	-0.245148	0.8063994857033783	0.9821086447545352	-5.48404
3:195688532-195689438:+	-0.753778	-1.55582	-2.31163	0.0210292	0.0926718	-3.50333	ENSG00000242086	MUC20-OT1	GBA_Control_v_Control	-0.486637	1.201309064762608	-0.94897	0.34289809525502735	0.8605768339808534	-5.13735
11:108267170-108268609:+	-0.485624	-3.01608	-2.2792	0.022889618410816145	0.0958396	-3.50661	ENSG00000149311	ATM	GBA_Control_v_Control	-0.852916	3.338749419845894	-1.25544	0.20965567388077172	0.8059861096765057	-4.87908
14:101901718-101906529:+	-0.531005	-2.47916	-2.28793	0.022374222851395002	0.094904	-3.50879	ENSG00000078304	PPP2R5C	GBA_Control_v_Control	-0.0204761	3.317493942772388	-0.040066	0.9680496229604042	0.9964404752602921	-5.55705
1:203707008-203708104:+	-0.45782	-1.87859	-2.30029	0.021661207558013033	0.0935304	-3.51179	ENSG00000058668	ATP2B4	GBA_Control_v_Control	-0.0830107	2.2721227368403762	-0.226278	0.8210383269077194	0.9821086447545352	-5.52059
16:14627105-14627336:-	-0.529475	-2.56076	-2.2849	0.0225521	0.0953777	-3.51341	ENSG00000140694	PARN	GBA_Control_v_Control	-0.746728	0.5432364680686785	-1.39347	0.16383085658267763	0.7871086807533572	-4.68977
11:77683709-77693611:-	-0.590299	-2.82353	-2.28131	0.022764185539422544	0.0955565	-3.51361	ENSG00000048649	RSF1	GBA_Control_v_Control	0.019523249550438493	0.821276	0.0380634	0.9696457797602918	0.9964404752602921	-5.5034
4:39913610-39925933:-	-0.503527	-0.0641676	-2.3544	0.0187687	0.0887679	-3.51922	ENSG00000121892	PDS5A	GBA_Control_v_Control	0.9897507392660607	-1.43521	1.5293784156580752	0.1265321140783624	0.7473876706656397	-4.52854
13:113520615-113539507:+	-0.459146	-3.0052	-2.27098	0.0233847	0.0974266	-3.52549	ENSG00000276248,ENSG00000150403	AL442125.1,TMCO3	GBA_Control_v_Control	-0.12756	0.64583	-0.255823	0.7981477268537991	0.9821086447545352	-5.48268
8:94537102-94538346:-	-0.602816	-1.48297	-2.30555	0.021365772180232667	0.0929453	-3.52814	ENSG00000164944	VIRMA	GBA_Control_v_Control	-0.220688	1.4007340587957235	-0.67936	0.4970896224408041	0.9101564624624974	-5.32058
15:41375711-41377304:+	-0.511964	-0.317768	-2.34111	0.019445750532227104	0.0896962	-3.52972	ENSG00000285920,ENSG00000137804	AC087721.2,NUSAP1	GBA_Control_v_Control	-0.119479	1.4844884219393244	-0.518518	0.6042276925459227	0.937919	-5.40793
16:48347506-48348290:+	-0.366692	-1.9039	-2.28777	0.022383561607498655	0.094904	-3.53654	ENSG00000102910	LONP2	GBA_Control_v_Control	-0.242961	3.0760017992282953	-0.863983	0.38783382144868284	0.8823077098619806	-5.23805
10:87508335-87521169:+	-0.500925	-0.813082	-2.32122	0.020498957823152714	0.0920261	-3.54558	ENSG00000107789	MINPP1	GBA_Control_v_Control	-0.290676	-1.64569	-0.606118	0.5445939010808132	0.9210556552849787	-5.34528
4:53399729-53428183:+	-0.367624	-2.00772	-2.28316	0.022654528769315663	0.0955565	-3.54785	ENSG00000282278,ENSG00000145216	AC058822.1,FIP1L1	GBA_Control_v_Control	0.3150884599288437	0.7942888257558629	0.5620011990490689	0.5742591466531308	0.937919	-5.37416
13:21167987-21168399:-	-0.467855	-0.993181	-2.30449	0.0214234	0.0929453	-3.56926	ENSG00000165480	SKA3	GBA_Control_v_Control	0.8121565570155257	-3.64387	1.81093	0.0704941	0.648659	-4.16458
4:36228581-36229645:-	-0.442003	-0.811363	-2.30519	0.021383628523458313	0.0929453	-3.57278	ENSG00000047365	ARAP2	GBA_Control_v_Control	0.17474841640337146	3.1818699602016896	0.8679672655199357	0.38565014357434646	0.8823077098619806	-5.24703
7:106097689-106099282:-	-0.458696	-2.41066	-2.25717	0.0242377	0.10015176067780043	-3.57311	ENSG00000008282	SYPL1	GBA_Control_v_Control	-0.324245	1.7080991219452573	-0.883288	0.37732311932978857	0.8823077098619806	-5.19047
2:61522610-61533903:-	-0.464932	-0.0297091	-2.33074	0.019988179480817027	0.090937	-3.57336	ENSG00000082898	XPO1	GBA_Control_v_Control	-1.35006	-1.76816	-1.98404	0.0475634	0.641135	-3.87989
15:65722847-65741784:-	-0.458453	-3.17519	-2.24761	0.024843531923656688	0.1015291600160681	-3.5758	ENSG00000174485	DENND4A	GBA_Control_v_Control	-0.140112	-4.42922	-0.308939	0.757443	0.9805295737340175	-5.58284
21:39206107-39229436:-	-0.483831	-3.15128	-2.24576	0.024962732906320655	0.1015291600160681	-3.57859	ENSG00000237373,ENSG00000185658	BRWD1-IT1,BRWD1	GBA_Control_v_Control	0.0176844	-4.07957	0.0342303	0.9727015717400945	0.9964404752602921	-5.59822
10:48401611-48410168:+	-0.512975	-1.60955	-2.27742	0.022996255482082912	0.0960465	-3.5849	ENSG00000107643	MAPK8	GBA_Control_v_Control	0.7870649679930168	1.2636091902781248	1.7710047620987113	0.076908	0.6675788786005744	-4.19831
16:50287911-50288350:+	-0.611358	-2.11042	-2.25655	0.024277407144648468	0.10015176067780043	-3.58735	ENSG00000121281	ADCY7	GBA_Control_v_Control	-1.23269	3.376842031465436	-2.0146	0.0442523	0.641135	-3.82255
1:15717892-15721388:+	-0.268409	-0.604604	-2.30568	0.021356347633571145	0.0929453	-3.59055	ENSG00000116786	PLEKHM2	GBA_Control_v_Control	0.2003933493791461	-0.0896266	0.6115124433938808	0.5410192128905907	0.9210556552849787	-5.34137
10:11481769-11485911:-	-0.537947	-2.44874	-2.24967	0.024712	0.1015291600160681	-3.59612	ENSG00000148429	USP6NL	GBA_Control_v_Control	-0.230371	-0.526146	-0.629769	0.5290098478624641	0.9210556552849787	-5.32594
2:61522610-61526521:-	-0.486712	-2.3951	-2.24624	0.0249317	0.1015291600160681	-3.59676	ENSG00000082898	XPO1	GBA_Control_v_Control	1.4242582726773385	1.2290513914949845	2.1857458831229284	0.029098650545958345	0.6058918142876922	-3.51223
7:32632542-32639365:-	-0.43505	-1.08484	-2.28129	0.022765087844635462	0.0955565	-3.59733	ENSG00000229358	DPY19L1P1	GBA_Control_v_Control	-0.268488	1.3688265754347635	-1.24254	0.21437073751204094	0.8059861096765057	-4.86471
1:26942659-26943065:+	-0.488704	-2.43002	-2.24513	0.0250032	0.1015291600160681	-3.59994	ENSG00000090273	NUDC	GBA_Control_v_Control	-0.122109	2.1944057886220887	-0.307376	0.7586303884733294	0.9809642824510516	-5.49722
4:78826036-78851056:+	-0.389329	-1.11429	-2.28814	0.022361547170606514	0.094904	-3.60164	ENSG00000138756	BMP2K	GBA_Control_v_Control	0.8394754298989988	-3.48642	1.4940418472296921	0.13552523330008898	0.7635800896337228	-4.61005
X:135545422-135549805:+	-0.449192	-2.71975	-2.23839	0.0254407	0.10223815615714653	-3.60301	ENSG00000165359	INTS6L	GBA_Control_v_Control	-0.696778	1.1809360298383065	-1.5485	0.1218637649541932	0.7360045372593179	-4.50447
15:65702304-65703008:-	-0.542469	-2.6553	-2.23874	0.025417672856276403	0.10223815615714653	-3.60611	ENSG00000174485	DENND4A	GBA_Control_v_Control	0.8706411209809504	-0.784076	1.2534359530562083	0.21038194193555354	0.8059861096765057	-4.84217
17:78004169-78031842:+	-0.442504	-2.55471	-2.24003	0.025333479576721732	0.10223815615714653	-3.60783	ENSG00000279600,ENSG00000078687	AC015804.1,TNRC6C	GBA_Control_v_Control	-0.357158	0.0943601	-1.23287	0.21795490677224968	0.8059861096765057	-4.86169
1:235780864-235782087:-	-0.542773	-2.77263	-2.2307	0.025947738997399272	0.10323756819107437	-3.6165	ENSG00000143669	LYST	GBA_Control_v_Control	-0.993964	1.6716886831650786	-1.16502	0.2443268436891934	0.8347597743132787	-4.9494
2:32098795-32116212:+	-0.477257	-3.0212	-2.22816	0.026117421279732673	0.1032978199934945	-3.6177	ENSG00000021574	SPAST	GBA_Control_v_Control	0.8863215131359481	-1.61872	1.532883594239672	0.12566604130529163	0.7473876706656397	-4.51866
11:85996825-86003451:-	-0.313888	1.5248439098770732	-2.35599	0.018688336037656978	0.0887679	-3.62763	ENSG00000073921	PICALM	GBA_Control_v_Control	-0.172531	-3.6449	-0.291672	0.7706083312426433	0.9821086447545352	-5.53923
4:177353307-177353728:+	-0.450451	0.7136102750986703	-2.32721	0.020176766929362402	0.0910375	-3.63471	ENSG00000109674	NEIL3	GBA_Control_v_Control	-0.407017	2.0385667662054923	-1.27382	0.20306593264140826	0.8027947461613064	-4.84834
2:23819746-23823569:-	-0.369108	-1.17389	-2.26689	0.023634746806620296	0.0982246	-3.63921	ENSG00000119778	ATAD2B	GBA_Control_v_Control	-1.72382	-1.24406	-2.54877	0.0109801	0.4640552493031974	-2.79237
9:4823547-4827033:+	-0.564726	-1.92155	-2.23412	0.0257221	0.10282712382555755	-3.64407	ENSG00000120158	RCL1	GBA_Control_v_Control	0.4124184698103543	-4.04314	1.0085736409807835	0.31345800293928655	0.8559777364617792	-5.16475
7:26169739-26171541:-	-0.468858	-2.93343	-2.20735	0.0275426	0.10729455346925747	-3.65803	ENSG00000050344	NFE2L3	GBA_Control_v_Control	-0.464348	-0.0640227	-1.17388	0.24076162718354266	0.8307451706813072	-4.92596
11:120474559-120477526:+	-0.561778	-2.50903	-2.22173	0.026551203497908533	0.10440157066273636	-3.65992	ENSG00000196914	ARHGEF12	GBA_Control_v_Control	0.31969533990558907	-1.28617	0.6485224331290274	0.5168172802988269	0.9210556552849787	-5.31557
1:145974824-145975436:+	-0.36762	-2.35343	-2.215	0.027010854674874955	0.10571381118674837	-3.6666	ENSG00000280778,ENSG00000121851	AC243547.3,POLR3GL	GBA_Control_v_Control	-0.148339	2.6638564223145353	-0.483546	0.6288289765588992	0.9405053413475982	-5.44521
13:50068096-50075653:-	-0.543071	-3.105	-2.1985	0.0281687	0.10922689313421724	-3.67363	ENSG00000231607	DLEU2	GBA_Control_v_Control	0.056536188619404903	0.816174	0.077566	0.9381910031761832	0.9915398309595024	-5.50218
18:9524593-9525851:+	-0.603277	-1.4815	-2.23768	0.025489671473301705	0.10223815615714653	-3.67533	ENSG00000017797	RALBP1	GBA_Control_v_Control	-0.279425	3.734181287410785	-0.73118	0.4648649883909378	0.8992031284658809	-5.34741
2:147972738-147975975:-	-0.600435	-2.67083	-2.20336	0.027824209396872288	0.10814085087349205	-3.677	ENSG00000115947	ORC4	GBA_Control_v_Control	0.7457521635885094	0.1444187902729326	1.0840980017590356	0.2786200000943265	0.84418	-5.01018
3:196058283-196060247:-	-0.504138	-1.48341	-2.23165	0.0258848	0.10323188432921641	-3.68321	ENSG00000072274	TFRC	GBA_Control_v_Control	-0.906873	1.5500947458302203	-1.66958	0.0953597	0.6963735360482091	-4.34981
3:142397328-142405076:-	-0.541568	-2.95579	-2.19681	0.0282898	0.10944356484328835	-3.68484	ENSG00000114127	XRN1	GBA_Control_v_Control	-1.43386	1.5718980880692703	-2.35662	0.0186618	0.5181226712443692	-3.18573
10:124706635-124706887:-	-0.40922	-2.80053	-2.19392	0.028497519609449216	0.10999387453854076	-3.68657	ENSG00000258539,ENSG00000189319	AC068896.1,FAM53B	GBA_Control_v_Control	-0.305873	1.8474489738787976	-0.616291	0.5378628800750929	0.9210556552849787	-5.36314
1:27789561-27793632:+	-0.467127	-3.16278	-2.18997	0.028783757929036743	0.11009794915663303	-3.68835	ENSG00000117758	STX12	GBA_Control_v_Control	-0.373886	1.595387352510836	-0.64597	0.5184680659975925	0.9210556552849787	-5.34482
14:30902535-30911162:-	-0.409948	-1.12828	-2.24464	0.0250346	0.1015291600160681	-3.6906	ENSG00000196792	STRN3	GBA_Control_v_Control	0.00658006	1.2453893429784149	0.0315393	0.9748466073317973	0.996674	-5.51156
1:169477154-169477757:-	-0.444113	-2.61457	-2.18993	0.028786777653223287	0.11009794915663303	-3.7044	ENSG00000117479	SLC19A2	GBA_Control_v_Control	-0.124722	-0.632096	-0.451066	0.6520535077200708	0.9529980119380987	-5.41602
9:33953284-33963791:-	-0.396277	-1.35685	-2.22343	0.026436038151439776	0.10419274191612063	-3.70933	ENSG00000137073	UBAP2	GBA_Control_v_Control	0.0160189	-5.09579	0.052722	0.9579690741238067	0.9951955291565148	-5.69162
1:20749722-20773610:-	-0.330594	-0.544005	-2.25832	0.0241654	0.10015176067780043	-3.71275	ENSG00000127483	HP1BP3	GBA_Control_v_Control	1.8685514026136802	1.411910298530478	2.8774	0.00410723	0.3283825104480537	-2.03706
7:155672866-155680908:+	-0.502855	-0.803485	-2.24694	0.0248876	0.1015291600160681	-3.71304	ENSG00000184863	RBM33	GBA_Control_v_Control	0.6293002351923374	0.31812268987322717	1.0724400236374176	0.2838181588748477	0.8441858999972556	-5.02327
9:135881632-135883078:-	-0.247534	0.8420062110856302	-2.28948	0.0222837	0.094904	-3.72193	ENSG00000130559	CAMSAP1	GBA_Control_v_Control	0.2441974974445542	-2.12451	0.5189633140771295	0.6039175646352772	0.937919	-5.39536
7:131387119-131399433:+	-0.447437	-1.0896	-2.2283	0.0261084	0.1032978199934945	-3.72508	ENSG00000128585	MKLN1	GBA_Control_v_Control	0.3456154869040704	2.243784860660361	0.6572310833790896	0.5112051957035989	0.9199501860518141	-5.36494
14:89161700-89180806:-	-0.380098	-2.26592	-2.19093	0.028713954139044706	0.11009794915663303	-3.727	ENSG00000053254	FOXN3	GBA_Control_v_Control	-0.437016	0.8184150419428358	-1.37996	0.1679527342159503	0.7871086807533572	-4.71112
4:39737419-39774933:+	-0.529912	-3.04274	-2.17394	0.029971358736183017	0.1125769828144324	-3.72838	ENSG00000078140,ENSG00000243260	UBE2K,RN7SL558P	GBA_Control_v_Control	-0.53814	-2.6915	-0.882502	0.3777477837171801	0.8823077098619806	-5.207
18:79728906-79736521:+	-0.3858	-1.06596	-2.22771	0.026147452946536722	0.1032978199934945	-3.72865	ENSG00000060069	CTDP1	GBA_Control_v_Control	-0.246343	0.8453292663775595	-0.763928	0.44511624634632174	0.8946831700325871	-5.26739
8:116655855-116658980:-	-0.459373	-2.02051	-2.19258	0.0285946	0.11009794915663303	-3.73631	ENSG00000147677	EIF3H	GBA_Control_v_Control	-0.144731	4.613672861018928	-0.332366	0.7396924956208887	0.9710271306860612	-5.53315
15:65178933-65180204:-	-0.559592	-2.92526	-2.17135	0.030166668179912492	0.11284905820695967	-3.7364	ENSG00000166855	CLPX	GBA_Control_v_Control	-0.330933	1.9918784530517595	-0.605374	0.5450874413442102	0.9210556552849787	-5.36923
12:95988192-95990532:-	-0.486413	-2.78915	-2.16971	0.030291251268287828	0.11302002417656726	-3.73879	ENSG00000084110	HAL	GBA_Control_v_Control	-0.25532	2.036536678191103	-0.502553	0.6154048324543258	0.937919	-5.42455
8:73673106-73688813:-	-0.527967	-2.43589	-2.17479	0.029907	0.1125769828144324	-3.74322	ENSG00000040341,ENSG00000258677	STAU2,AC022826.2	GBA_Control_v_Control	1.4551264744090302	-0.0569534	2.3299902910071006	0.0200333	0.5202819386389643	-3.23563
2:39336919-39337581:-	-0.455718	-1.9635	-2.18661	0.0290292	0.11061564082406293	-3.74456	ENSG00000011566	MAP4K3	GBA_Control_v_Control	0.29687095252031614	0.24835459483259256	1.0771078491404624	0.2817288438233434	0.8441858999972556	-5.01144
15:94298200-94298730:+	-0.53635	-1.95894	-2.1852	0.0291328	0.11066494605517858	-3.74503	ENSG00000140563	MCTP2	GBA_Control_v_Control	0.5137334058823511	2.6062222008203966	0.7165104113699291	0.4738674532731916	0.8996202637244488	-5.33205
12:28255580-28307749:+	-0.485356	-2.0525	-2.18156	0.029401417061441937	0.1114333617294831	-3.74702	ENSG00000123106	CCDC91	GBA_Control_v_Control	0.6941798443935947	-3.5021	1.31893	0.1875360767953056	0.8007786065832116	-4.82608
16:27213584-27215008:+	-0.557406	-2.64618	-2.15494	0.031433	0.11646500831204709	-3.77135	ENSG00000155666	KDM8	GBA_Control_v_Control	-0.115581	-1.22019	-0.342168	0.7323065545422229	0.9673821440412214	-5.44673
15:65667448-65670188:-	-0.424764	-1.76764	-2.17808	0.029660454207696856	0.11216194282595275	-3.77927	ENSG00000174485	DENND4A	GBA_Control_v_Control	0.40742313786893014	-0.716267	0.7036522564616235	0.48183657686933856	0.9023692098170306	-5.29821
5:57246299-57249576:+	-0.545149	-2.26626	-2.15419	0.031492	0.11646500831204709	-3.79686	ENSG00000062194	GPBP1	GBA_Control_v_Control	0.10312111657145806	-0.562308	0.13680523965246208	0.8912162156689095	0.9837948889599599	-5.49364
6:111405469-111472140:-	-0.465949	-2.99075	-2.13828	0.032764	0.11984915805179511	-3.79836	ENSG00000009413	REV3L	GBA_Control_v_Control	0.5688868814921388	-0.894806	0.9855246487126131	0.3246388892977452	0.8587242186068984	-5.09597
10:101667885-101676436:-	-0.385782	-0.319266	-2.21297	0.027151069648996443	0.10601545567596518	-3.80205	ENSG00000107829	FBXW4	GBA_Control_v_Control	0.10297759025884634	0.8916404902643786	0.20495073818959278	0.8376582840746583	0.9821086447545352	-5.4948
12:6548424-6548825:-	-0.441215	-2.70925	-2.13723	0.032850069611684254	0.11990275408264753	-3.80507	ENSG00000010295	IFFO1	GBA_Control_v_Control	-0.135765	0.9787519053229036	-0.373328	0.7089951269149019	0.9633841297999743	-5.4478
13:95161188-95170628:-	-0.421694	-1.47418	-2.17594	0.0298204	0.11251323727966782	-3.80902	ENSG00000125257	ABCC4	GBA_Control_v_Control	0.1413952661296607	-2.75243	0.30162771262373506	0.7630075575324489	0.9821086447545352	-5.50197
11:68567013-68576043:+	-0.539601	-2.50128	-2.14146	0.032506366083684346	0.11968901020725004	-3.81005	ENSG00000110075	PPP6R3	GBA_Control_v_Control	0.8848126756003909	-1.98589	1.3265160773080154	0.18501495569313153	0.8007786065832116	-4.78343
4:143437998-143440382:+	0.46797140866834297	-3.02694	2.130805865788013	0.033377077530878006	0.1209499145681924	-3.8177	ENSG00000109458	GAB1	GBA_Control_v_Control	0.6743976458623915	-0.10894	1.550532315796823	0.12137543829739533	0.7357016639037067	-4.4956
1:113829591-113834439:-	-0.574219	-2.07167	-2.14283	0.0323967	0.11954734318748711	-3.82311	ENSG00000134242	PTPN22	GBA_Control_v_Control	-0.650047	0.30997948732334624	-1.22015	0.2227382697378789	0.8059861096765057	-4.87622
11:119273867-119274953:+	-0.567099	-2.63128	-2.12848	0.0335705	0.12121488230397466	-3.82317	ENSG00000110395	CBL	GBA_Control_v_Control	-0.890079	0.9128287309234908	-1.44353	0.1492280462729308	0.786634	-4.63719
9:107300140-107311737:+	-0.366858	-0.881495	-2.18627	0.0290539	0.11061564082406293	-3.82971	ENSG00000119318	RAD23B	GBA_Control_v_Control	-0.162675	4.1195907563152065	-0.575496	0.5651037864842481	0.9311180152179122	-5.4354
10:103438014-103438808:+	-0.476294	-2.02472	-2.13961	0.032655857372885413	0.11982157826081669	-3.83125	ENSG00000148843	PDCD11	GBA_Control_v_Control	-0.162831	0.46398769797184725	-0.585109	0.5586253148491129	0.9283558963272281	-5.35574
20:2964271-2965202:+	-0.277935	2.5273219666950584	-2.29548	0.0219358	0.0939546	-3.83242	ENSG00000132670	PTPRA	GBA_Control_v_Control	-0.518115	2.2441241728987267	-1.89625	0.0582555	0.648659	-4.01618
5:95906522-95932713:-	-0.501801	-2.93171	-2.12008	0.0342742	0.12280644284494588	-3.83956	ENSG00000118985	ELL2	GBA_Control_v_Control	-0.0691789	-0.768716	-0.146975	0.8831855780914344	0.9826829593210858	-5.4864
5:180261683-180280608:-	-0.366639	-2.35437	-2.13023	0.0334251	0.1209499145681924	-3.83964	ENSG00000050748	MAPK9	GBA_Control_v_Control	0.0699219	0.1764365845088519	0.15172917290616122	0.8794355262098921	0.9826798758222193	-5.48648
3:3777724-3789074:-	-0.430232	-2.45662	-2.11979	0.0342983	0.12280644284494588	-3.85407	ENSG00000144455	SUMF1	GBA_Control_v_Control	-0.689717	-1.09735	-2.88046	0.00406783	0.3283825104480537	-2.04717
12:116230432-116237705:-	-0.387352	-1.00897	-2.16189	0.030890845061762852	0.11474718774048634	-3.8561	ENSG00000123066	MED13L	GBA_Control_v_Control	-0.0541599	-0.677845	-0.0796664	0.9365208316179781	0.9915398309595024	-5.49577
16:11020192-11051641:+	-0.377269	-1.79376	-2.13925	0.0326851	0.11982157826081669	-3.85706	ENSG00000229917,ENSG00000038532	RPL7P46,CLEC16A	GBA_Control_v_Control	-0.525226	0.9085193101646951	-1.29536	0.19553731684958553	0.8007786065832116	-4.80341
3:49335019-49335596:-	-0.553759	-2.56508	-2.11719	0.0345198	0.12305456287330489	-3.85708	ENSG00000114316	USP4	GBA_Control_v_Control	-0.818335	3.2991806629180087	-1.3581	0.1747812849038539	0.7949283772014706	-4.7693
4:37631384-37635123:-	-0.441995	-2.41918	-2.11628	0.0345963	0.12306609420125457	-3.86009	ENSG00000181826	RELL1	GBA_Control_v_Control	0.12758065003692476	3.3750124037526983	0.27291325464591104	0.7849843000941032	0.9821086447545352	-5.51982
4:82970326-82979006:-	-0.479634	-2.19617	-2.12108	0.0341897	0.12280644284494588	-3.86308	ENSG00000189308	LIN54	GBA_Control_v_Control	-0.188364	1.1434557937369043	-0.411821	0.680572	0.9579118935070294	-5.44048
1:21221746-21228041:-	-0.394602	-2.9442	-2.10294	0.0357495	0.12530995704763548	-3.86649	ENSG00000117298	ECE1	GBA_Control_v_Control	-0.687996	1.6420443874150314	-1.55633	0.11999227770743004	0.7357016639037067	-4.50197
18:31832083-31839457:-	-0.468925	-2.7699	-2.10447	0.0356158	0.12510221533371138	-3.86754	ENSG00000153339	TRAPPC8	GBA_Control_v_Control	-0.731793	1.9350391275438712	-1.43706	0.15105977200584225	0.786634	-4.65398
1:42265114-42278784:-	-0.470167	-2.62608	-2.10873	0.035244815275019915	0.1243194219469715	-3.86953	ENSG00000198815	FOXJ3	GBA_Control_v_Control	-0.539569	0.550264	-1.18382	0.2368051343170108	0.8307451706813072	-4.92118
2:8943186-8982144:-	-0.464659	-2.86216	-2.10198	0.0358341	0.12534465702541484	-3.87217	ENSG00000143797	MBOAT2	GBA_Control_v_Control	-0.00174372	-0.912572	-0.00379687	0.9969714060523099	0.9992617121262675	-5.49522
5:154950820-154967237:+	-0.440005	-2.33556	-2.11221	0.034945	0.12378186247672872	-3.87858	ENSG00000082515	MRPL22	GBA_Control_v_Control	-0.614111	0.662484	-1.62923	0.10362504160116075	0.730176	-4.39098
16:15879803-15884205:-	-0.466967	-2.612	-2.09829	0.0361589	0.12621786471370508	-3.88632	ENSG00000133393	CEP20	GBA_Control_v_Control	-0.360605	0.9898794913492828	-0.922223	0.35666632795305075	0.8708112777136138	-5.14873
1:95140672-95151419:+	-0.419117	-1.52043	-2.13119	0.0333452	0.1209499145681924	-3.89231	ENSG00000271092,ENSG00000152078	TLCD4-RWDD3,TLCD4	GBA_Control_v_Control	-0.545078	-2.26472	-2.11902	0.034369809582142176	0.6278743191681722	-3.63323
14:50329832-50332432:-	-0.496373	-2.92048	-2.08956	0.036939	0.12867338207382545	-3.89658	ENSG00000100490	CDKL1	GBA_Control_v_Control	-0.00256839	-0.316716	-0.0063303	0.9949506271685471	0.9990718280437094	-5.49706
3:179378340-179392104:+	-0.527178	-3.36033	-2.07407	0.0383582	0.13171514035701046	-3.91827	ENSG00000171109	MFN1	GBA_Control_v_Control	-0.348752	-0.643289	-0.524796	0.5998582503180314	0.937919	-5.38411
16:24032135-24035547:+	-0.358594	-1.49983	-2.10716	0.035381611498993666	0.12454030546501126	-3.92285	ENSG00000166501	PRKCB	GBA_Control_v_Control	0.595761	1.3239483669012588	0.9429539019575859	0.3459647864620822	0.8638512846383748	-5.15
3:170136418-170149244:-	-0.211585	2.0292268821025647	-2.23727	0.0255139	0.10223815615714653	-3.92424	ENSG00000173889	PHC3	GBA_Control_v_Control	1.3901210719356012	0.1294702091325282	2.8998941989487506	0.00382632	0.3283825104480537	-1.99595
9:83677726-83678599:-	-0.44829	-2.93433	-2.07285	0.038472	0.13171514035701046	-3.92883	ENSG00000135018	UBQLN1	GBA_Control_v_Control	-0.824179	-2.74513	-1.43129	0.15270371410400357	0.786634	-4.65907
14:52536718-52544371:-	-0.376962	0.079299	-2.1712	0.030178217471664617	0.11284905820695967	-3.92924	ENSG00000087301	TXNDC16	GBA_Control_v_Control	0.18786508590561368	-0.224953	0.41536773241420333	0.6779745695615833	0.9579118935070294	-5.42272
6:42592150-42594304:+	-0.357084	-1.40463	-2.11745	0.0344968	0.12305456287330489	-3.93502	ENSG00000024048	UBR2	GBA_Control_v_Control	-0.0129771	4.8196958627471655	-0.0404753	0.9677234065150133	0.9964404752602921	-5.58538
X:53614533-53615835:-	-0.524884	-2.79125	-2.06547	0.0391658	0.13311609232743152	-3.94468	ENSG00000086758	HUWE1	GBA_Control_v_Control	0.3443439863459101	0.5327294447469545	0.7388727232718064	0.4601824550345637	0.8992031284658809	-5.27561
16:56385918-56389375:-	-0.43113	-2.13796	-2.07858	0.037940338944140055	0.13080457718113173	-3.94875	ENSG00000159461	AMFR	GBA_Control_v_Control	-0.383603	2.1966859250280155	-0.816986	0.4141585942956896	0.8827374546744412	-5.25797
8:123333877-123337821:-	-0.408528	-2.08769	-2.0845	0.037397976106160864	0.12946639563349296	-3.94899	ENSG00000156802	ATAD2	GBA_Control_v_Control	-0.356374	0.4456207858236192	-0.921909	0.35683035084393466	0.8708112777136138	-5.1427
10:96544075-96576829:-	-0.393391	-2.42143	-2.07154	0.0385944	0.13171514035701046	-3.95169	ENSG00000077147	TM9SF3	GBA_Control_v_Control	0.39530786308983856	0.1648084791132747	0.5033601816583279	0.6148377630274151	0.937919	-5.40247
5:1057470-1065478:-	-0.508655	-3.01868	-2.05969	0.0397165	0.1344622495478881	-3.95335	ENSG00000113504,ENSG00000263834	SLC12A7,MIR4635	GBA_Control_v_Control	-0.441782	-0.410236	-0.999381	0.317886	0.8559777364617792	-5.0818
7:105073618-105077433:+	-0.483147	-3.0088	-2.05915	0.039768207665037504	0.1344622495478881	-3.95411	ENSG00000005483	KMT2E	GBA_Control_v_Control	-1.36192	1.43047	-2.12622	0.0337647	0.6278743191681722	-3.61775
20:36911217-36912552:-	-0.342251	-0.896473	-2.11519	0.0346897	0.12313735814437825	-3.9556	ENSG00000101347	SAMHD1	GBA_Control_v_Control	1.1964972746940326	3.8065515975634017	2.704604320103736	0.00697143	0.3941686450609576	-2.44406
13:41252644-41260915:-	-0.486375	-2.27414	-2.07081	0.0386631	0.13171514035701046	-3.95934	ENSG00000120662	MTRF1	GBA_Control_v_Control	1.024059596463582	-1.32136	1.9890240399627812	0.0470096	0.641135	-3.84999
17:67928354-67932019:+	-0.427976	-2.83413	-2.05291	0.040371041438074774	0.13583763241388286	-3.97034	ENSG00000171634	BPTF	GBA_Control_v_Control	-0.326383	1.0438073392799894	-0.60596	0.544699	0.9210556552849787	-5.35367
13:40933469-40934028:-	-0.521322	-3.14822	-2.04528	0.041118762312774684	0.1372532841414487	-3.97191	ENSG00000120690	ELF1	GBA_Control_v_Control	-1.52551	2.9315617655695148	-1.98253	0.0477319	0.641135	-3.87992
6:18212487-18213781:+	-0.500359	-3.17007	-2.04278	0.0413671	0.1377681906265004	-3.97481	ENSG00000165097	KDM1B	GBA_Control_v_Control	-0.702493	0.9246559483147434	-1.252	0.21090275014714163	0.8059861096765057	-4.85275
5:134157706-134174022:-	-0.741573	-2.86635	-2.05569	0.0401087	0.13522576560388302	-3.97605	ENSG00000272772,ENSG00000113558	AC104109.3,SKP1	GBA_Control_v_Control	0.7934091201079063	-0.328668	0.9363569105549355	0.3493478393504803	0.8638512846383748	-5.13674
2:8943186-8987761:-	-0.413599	-2.81653	-2.04207	0.0414371	0.1377681906265004	-3.98665	ENSG00000143797	MBOAT2	GBA_Control_v_Control	0.21471387497503613	-1.148	0.38852197132509864	0.6977243219736351	0.9631176654860899	-5.46062
9:6420911-6434173:+	-0.40785	-1.64941	-2.0719	0.0385602	0.13171514035701046	-3.99328	ENSG00000147854	UHRF2	GBA_Control_v_Control	0.5950366721622005	2.6010612285466994	1.9126060488623384	0.056124702717211664	0.648659	-3.99413
15:84680712-84691644:-	-0.475225	-3.12856	-2.03499	0.0421456	0.13929624056390957	-3.99458	ENSG00000140612	SEC11A	GBA_Control_v_Control	0.2200616998408158	1.0989008837255025	0.415034	0.6782186384963436	0.9579118935070294	-5.44646
11:3731390-3753408:-	-0.312272	-0.831297	-2.10943	0.0351841	0.1243194219469715	-3.99907	ENSG00000110713	NUP98	GBA_Control_v_Control	1.3585016395949019	2.5342298356952613	2.629554457464182	0.00869978	0.42961550484758376	-2.61473
14:49669523-49674427:-	-0.577892	-2.1574	-2.05159	0.0405026	0.1360078196327414	-3.9997	ENSG00000100479	POLE2	GBA_Control_v_Control	-0.206705	-1.6363	-0.507041	0.6122540888925144	0.937919	-5.39911
8:51860844-51861246:-	-0.327994	2.66204	-2.21678	0.026888615253992117	0.10548127339124477	-4.00147	ENSG00000168300	PCMTD1	GBA_Control_v_Control	0.3111138692268991	-3.4146	0.7367735024668262	0.4614576144587538	0.8992031284658809	-5.34418
10:113876520-113884380:+	-0.446598	-2.6315	-2.03947	0.0416966	0.13808388714724346	-4.00198	ENSG00000196865	NHLRC2	GBA_Control_v_Control	0.0423228	1.2181192442262907	0.0976814	0.9222076245199771	0.9893844099482694	-5.50805
10:49915916-49935142:-	-0.445774	-2.33201	-2.04814	0.040837	0.1365844162913665	-4.00495	ENSG00000227345	PARG	GBA_Control_v_Control	-0.361348	1.5384170585622643	-0.950652	0.3420436979509255	0.8605768339808534	-5.14268
21:37420298-37421866:+	-0.389852	-2.04946	-2.05027	0.040628546349562165	0.13615834195791393	-4.00517	ENSG00000157540	DYRK1A	GBA_Control_v_Control	-0.0613197	1.1196835996140448	-0.123841	0.9014694420231364	0.9847541920343826	-5.50467
10:45533109-45553204:-	-0.481281	-3.20007	-2.02508	0.0431553	0.14096843522530456	-4.0118	ENSG00000165406	MARCHF8	GBA_Control_v_Control	-1.45854	1.8831301452196445	-1.74513	0.0813127	0.6801303462911467	-4.24022
11:85990249-86031611:-	-0.370394	-1.27081	-2.08701	0.0371698	0.12920918450463578	-4.01488	ENSG00000073921	PICALM	GBA_Control_v_Control	0.6470045316268305	-1.49638	0.8290937859662709	0.4072774740324857	0.8827087649054147	-5.21972
16:346147-347106:-	-0.384161	-1.61706	-2.0588	0.0398021	0.1344622495478881	-4.01587	ENSG00000103126	AXIN1	GBA_Control_v_Control	-0.152467	1.4221086849698403	-0.639324	0.522779	0.9210556552849787	-5.34515
15:41707727-41713496:+	-0.421736	-2.96381	-2.02577	0.0430845	0.14096843522530456	-4.01658	ENSG00000174197	MGA	GBA_Control_v_Control	0.5836525929520655	-1.15712	1.0718307110804115	0.2840916414438778	0.8441858999972556	-5.0151
3:56592969-56594028:+	-0.594657	-2.43989	-2.03987	0.0416598	0.13808388714724346	-4.0167	ENSG00000180376	CCDC66	GBA_Control_v_Control	0.7917742354779662	-0.939325	1.5147190450632093	0.1302047400538024	0.7540158989024156	-4.53889
10:11601344-11601980:-	-0.52088	-2.13305	-2.03397	0.0422497	0.13936602913855453	-4.03708	ENSG00000148429	USP6NL	GBA_Control_v_Control	-0.478298	-0.884372	-1.28269	0.19993997275236008	0.802695	-4.8087
16:80684537-80685129:-	-0.394307	-2.31337	-2.02555	0.0431072	0.14096843522530456	-4.039	ENSG00000166446	CDYL2	GBA_Control_v_Control	0.13029364753993633	-0.110389	0.611349	0.5411273071043976	0.9210556552849787	-5.34111
5:73058432-73077493:+	-0.363214	-0.0686414	-2.11972	0.034303884272947956	0.12280644284494588	-4.03944	ENSG00000157107	FCHO2	GBA_Control_v_Control	-0.317196	-4.10357	-0.798803	0.4246237454910905	0.8898052120306004	-5.3441
19:4354948-4355173:+	-0.411779	-3.18672	-2.00724	0.0450244	0.14399226611809962	-4.03993	ENSG00000008382	MPND	GBA_Control_v_Control	0.034222091360342155	-0.0628033	0.0818974	0.9347469988202776	0.9915398309595024	-5.49446
2:201330469-201364173:-	-0.439075	-2.65618	-2.0209	0.0435878	0.1421045866432641	-4.04526	ENSG00000155749	FLACC1	GBA_Control_v_Control	-0.360287	-3.15187	-0.739756	0.4596465535661398	0.8992031284658809	-5.32428
5:95755395-95763620:+	-0.34481	1.5808347745292521	-2.16402	0.030726729600070876	0.11439064079494235	-4.04653	ENSG00000164292	RHOBTB3	GBA_Control_v_Control	0.30668685920624184	0.00428893	0.9949205373495135	0.3200499076341032	0.8559777364617792	-5.07907
1:40189054-40202614:+	-0.420901	-2.43699	-2.01673	0.044022267396343885	0.14312076971455592	-4.0561	ENSG00000117000	RLF	GBA_Control_v_Control	-0.0592227	1.9535835079730577	-0.120071	0.9044544650460569	0.9864345615157127	-5.51814
1:111147641-111174963:+	-0.357327	-2.57202	-2.01219	0.0444993	0.14340550076611838	-4.05621	ENSG00000134255	CEPT1	GBA_Control_v_Control	0.41511196648841375	1.8357017807957172	0.7749134944036858	0.43860015474248437	0.8938490480862389	-5.28077
1:20757165-20773610:-	-0.307774	0.6718769669631375	-2.13074	0.0333826	0.1209499145681924	-4.05958	ENSG00000127483	HP1BP3	GBA_Control_v_Control	-0.269655	-3.76135	-0.492442	0.622531	0.937919	-5.5312
6:34606554-34646798:-	-0.474988	-2.84571	-2.00514	0.0452481	0.14441877350655133	-4.06143	ENSG00000196821	ILRUN	GBA_Control_v_Control	-0.352251	-0.453846	-0.547573	0.5841245823001961	0.937919	-5.375
13:114040999-114073837:-	-0.43806	-2.47937	-2.0083	0.0449109	0.14390336418700042	-4.06258	ENSG00000185989	RASA3	GBA_Control_v_Control	0.21318138882258386	0.6587208697181224	0.2836652291145894	0.7767340553205463	0.9821086447545352	-5.47548
4:139137629-139139497:-	-0.438633	-1.73722	-2.02677	0.0429822	0.14096843522530456	-4.06731	ENSG00000109381	ELF2	GBA_Control_v_Control	-0.694178	-0.861953	-0.855391	0.3925689246625288	0.8827087649054147	-5.19537
18:9583116-9595102:-	-0.411536	-2.25176	-2.01014	0.0447159	0.14382760669936773	-4.07522	ENSG00000154845	PPP4R1	GBA_Control_v_Control	0.028683006506264874	-1.38227	0.0378672	0.9698021717711414	0.9964404752602921	-5.50937
9:123452275-123454779:-	-0.441537	-2.84463	-1.9929	0.046576	0.1475492291594936	-4.08069	ENSG00000119522	DENND1A	GBA_Control_v_Control	-0.259133	0.5824665729341445	-0.609985	0.5420303157435875	0.9210556552849787	-5.34624
14:89161700-89162969:-	-0.273174	-0.448435	-2.07068	0.0386751	0.13171514035701046	-4.09651	ENSG00000053254	FOXN3	GBA_Control_v_Control	-0.311988	2.358376259444365	-1.32234	0.18640027686633848	0.8007786065832116	-4.80301
7:24623665-24650712:+	-0.432129	-2.03309	-2.00438	0.0453298	0.14441877350655133	-4.09819	ENSG00000105926	MPP6	GBA_Control_v_Control	0.8334415494632039	-4.07002	1.8253471796732033	0.0682895	0.648659	-4.16423
11:118581245-118584644:+	-0.450113	-2.94857	-1.98161	0.047828620910198835	0.1501014102957455	-4.10035	ENSG00000095139	ARCN1	GBA_Control_v_Control	-0.509636	0.9918080253285243	-0.735999	0.4619285042358139	0.8992031284658809	-5.28667
5:137985256-137988315:-	-0.407087	0.384498	-2.0852	0.0373337	0.12946639563349296	-4.1137	ENSG00000031003	FAM13B	GBA_Control_v_Control	0.5726826345031204	0.5339583099424094	1.3805274742439684	0.1677768822079004	0.7871086807533572	-4.71154
19:52728729-52730005:-	-0.449052	-2.12003	-1.98952	0.0469479	0.14816840482044544	-4.11753	ENSG00000213020	ZNF611	GBA_Control_v_Control	-0.160501	1.4675517014146369	-0.429444	0.667706	0.9579118935070294	-5.43747
17:68444492-68452992:-	-0.45569	-2.67723	-1.97652	0.0484022	0.1513357365788768	-4.1215	ENSG00000070540	WIPI1	GBA_Control_v_Control	0.21158731574070255	-0.13871	0.36859549734721136	0.712518	0.9633841297999743	-5.43703
14:24266429-24268619:-	-0.39416	-2.57099	-1.96955	0.0491976	0.15353676600590632	-4.13227	ENSG00000100949	RABGGTA	GBA_Control_v_Control	0.00189422	-1.72027	0.00771855	0.993843	0.9990718280437094	-5.50812
11:3731390-3735324:-	-0.436786	-2.98294	-1.95895	0.050428715712696436	0.15652856938658435	-4.13848	ENSG00000110713	NUP98	GBA_Control_v_Control	-0.474777	0.6356917676660527	-0.737523	0.46100189539433656	0.8992031284658809	-5.27522
7:140355667-140358785:-	-0.367245	-1.07269	-2.01492	0.044211426991331536	0.14312076971455592	-4.13974	ENSG00000157800	SLC37A3	GBA_Control_v_Control	0.28495161488945486	1.2888698020373752	0.9184502268090431	0.35863627315116564	0.8725475282181483	-5.163
11:16095995-16101330:-	-0.447885	-3.07785	-1.95706	0.0506514	0.15690726307957592	-4.14033	ENSG00000110693	SOX6	GBA_Control_v_Control	-0.00737501	-5.32637	-0.0493618	0.9606446504811454	0.9951955291565148	-5.71308
2:99186176-99195756:+	-0.446948	-2.71073	-1.96044	0.0502543	0.15652856938658435	-4.14507	ENSG00000185414,ENSG00000241962,ENSG00000273155	MRPL30,AC079447.1,AC092587.1	GBA_Control_v_Control	0.22388237981820325	0.4679509176746158	0.37245026725887476	0.7096478348767099	0.9633841297999743	-5.44753
2:207976650-207977586:-	-0.329297	-1.41943	-2.00351	0.045423185544453376	0.14444228888094168	-4.14685	ENSG00000178385	PLEKHM3	GBA_Control_v_Control	0.0581849	2.3835870826720646	0.2913453374414482	0.7708562397417008	0.9821086447545352	-5.51059
6:43055544-43056445:-	-0.355479	-1.52759	-1.99132	0.046748774118021835	0.1478176869004871	-4.14717	ENSG00000288564,ENSG00000112651	AL355385.2,MRPL2	GBA_Control_v_Control	-0.0658238	-0.211799	-0.37259	0.7095437887804676	0.9633841297999743	-5.43668
16:18841564-18845651:-	-0.420199	-2.05719	-1.97739	0.0483036	0.15130933758410484	-4.149	ENSG00000157106	SMG1	GBA_Control_v_Control	0.019925390857419956	2.1391918096597933	0.0354656	0.9717165514761639	0.9964404752602921	-5.53724
12:112229697-112233085:-	-0.455953	-3.1069	-1.9529	0.051143	0.15784763163488985	-4.14918	ENSG00000173064	HECTD4	GBA_Control_v_Control	-0.39773	-1.28214	-0.838628	0.4019069478289998	0.8827087649054147	-5.21377
1:30992389-30995220:-	-0.449811	-2.86313	-1.94747	0.0517903	0.15867880105981538	-4.16546	ENSG00000134644	PUM1	GBA_Control_v_Control	0.7518859666834585	-0.0262012	1.082	0.2795498378147421	0.84418	-5.00886
15:44615362-44620403:-	-0.361437	-1.70627	-1.98229	0.0477522	0.1501014102957455	-4.16594	ENSG00000104133	SPG11	GBA_Control_v_Control	0.3772913228244854	2.5142047401449963	0.7673879678216787	0.44305791867065825	0.8941036603942731	-5.30097
6:98899267-98934879:-	-0.362782	-2.66851	-1.94636	0.0519242	0.15879915465786246	-4.17379	ENSG00000112234	FBXL4	GBA_Control_v_Control	0.7229150118608526	-3.70871	1.323998457089251	0.18584935877395026	0.8007786065832116	-4.83088
19:14458030-14458375:+	-0.396814	-3.02312	-1.93583	0.0532026	0.16182465528692122	-4.17416	ENSG00000123143	PKN1	GBA_Control_v_Control	-0.400008	0.8546164015016461	-0.912605	0.3617017648523845	0.87511	-5.15896
12:116096668-116119779:-	-0.354329	-2.06144	-1.95889	0.050435947610567085	0.15652856938658435	-4.17981	ENSG00000123066	MED13L	GBA_Control_v_Control	0.24384225706077967	-0.627847	0.47471992978405286	0.6351050809049901	0.9438913193471123	-5.40522
11:33286412-33287511:+	-0.33865	1.134602613923639	-2.08111	0.037707588501746554	0.13026963188154828	-4.18109	ENSG00000110422	HIPK3	GBA_Control_v_Control	0.14323866767324844	4.573426250358869	0.8862788264948467	0.375711	0.8823077098619806	-5.24791
18:47865058-47896809:-	-0.259385	-0.346704	-2.0331	0.042336677886641465	0.13937898465033532	-4.18182	ENSG00000175387	SMAD2	GBA_Control_v_Control	0.4330227184878357	-3.31802	0.6459850931362493	0.5184584038309118	0.9210556552849787	-5.36461
9:36369718-36376127:-	-0.408537	-2.84893	-1.93721	0.0530335	0.16160285235157765	-4.18189	ENSG00000137075	RNF38	GBA_Control_v_Control	0.5232570163100907	-4.16387	1.1348699168340066	0.2567406436510806	0.842534	-5.04877
5:50778068-50797233:+	-0.31504	-1.18926	-1.98808	0.0471067	0.1483905068428676	-4.18303	ENSG00000151883	PARP8	GBA_Control_v_Control	0.14186518854879537	5.150592484236887	0.5214910237019598	0.6021566895229916	0.937919	-5.4655
1:172551511-172579267:+	-0.420546	-2.40203	-1.94339	0.0522818	0.15960218052387623	-4.19059	ENSG00000094975	SUCO	GBA_Control_v_Control	-0.256847	-1.88398	-0.410093	0.6818379310574555	0.9579118935070294	-5.44606
20:47262287-47276795:-	-0.288361	-0.768892	-2.01383	0.0443257	0.14312076971455592	-4.19616	ENSG00000101040	ZMYND8	GBA_Control_v_Control	1.254007827414675	-3.13118	2.179441831787777	0.029564920531559943	0.6058918142876922	-3.53468
21:37420298-37430400:+	-0.399475	-3.0695	-1.91817	0.055406810597924204	0.16638094060758177	-4.20503	ENSG00000157540	DYRK1A	GBA_Control_v_Control	0.32306398030074135	-0.837492	0.5146300793605845	0.606942	0.937919	-5.40996
12:116236820-116237705:-	-0.34319	-0.3406	-2.01387	0.0443222	0.14312076971455592	-4.20731	ENSG00000123066	MED13L	GBA_Control_v_Control	0.725427	1.643104119138993	1.2474709518494609	0.21255866611700608	0.8059861096765057	-4.87433
9:85669484-85712566:-	-0.433221	-1.98894	-1.95002	0.051486	0.15850179044155813	-4.20865	ENSG00000135049	AGTPBP1	GBA_Control_v_Control	1.7877946734013257	-1.24246	2.375068320756044	0.017760382405412216	0.5181226712443692	-3.14963
15:51869216-51902036:+	-0.397422	-3.14184	-1.91785	0.0554476	0.16638094060758177	-4.20868	ENSG00000207484,ENSG00000138594	AC090971.1,TMOD3	GBA_Control_v_Control	-0.0835493	1.3364981119300992	-0.117449	0.9065312034629993	0.9864345615157127	-5.51951
15:92996956-92998621:+	-0.491002	-0.84629	-1.9938	0.0464801	0.14752381798860448	-4.20919	ENSG00000173575	CHD2	GBA_Control_v_Control	-0.968635	0.1852736607336024	-2.34934	0.019028283225374254	0.5181226712443692	-3.1975
15:80098415-80122800:+	-0.380894	-1.88548	-1.94953	0.0515438	0.15850179044155813	-4.21016	ENSG00000086666	ZFAND6	GBA_Control_v_Control	-0.074985	1.3605441118338393	-0.168561	0.8661808158102224	0.9821086447545352	-5.50458
2:208285725-208288818:+	-0.370918	-2.68058	-1.92168	0.0549634	0.1659774560696965	-4.21169	ENSG00000115020	PIKFYVE	GBA_Control_v_Control	0.5243153166462893	1.3041407149009074	1.0665826316103606	0.28645457534706725	0.8441858999972556	-5.03696
16:24750725-24777358:+	0.3402846522004399	-1.76321	1.9477916432924474	0.0517521	0.15867880105981538	-4.23548	ENSG00000090905	TNRC6A	GBA_Control_v_Control	0.8493400391899657	1.9505818731803493	2.7042254104429984	0.00697929	0.3941686450609576	-2.44868
5:31421271-31424471:-	-0.438627	-2.56084	-1.91095	0.0563304	0.16769266841274824	-4.23987	ENSG00000113360	DROSHA	GBA_Control_v_Control	-0.249114	0.6269665850944377	-0.644295	0.5195527502144797	0.9210556552849787	-5.32879
11:120406117-120407823:+	-0.545254	-2.48008	-1.91542	0.0557606	0.1667873286844698	-4.24699	ENSG00000196914	ARHGEF12	GBA_Control_v_Control	0.38477142620372795	-1.46783	1.0305859790180636	0.3030198235619152	0.8553046509813077	-5.04936
8:127890588-127890998:+	-0.425427	-2.77419	-1.89898	0.0578878	0.17018782375238733	-4.24867	ENSG00000249859,ENSG00000278324	PVT1,AC084123.1	GBA_Control_v_Control	0.0725137	0.9502244794961643	0.16375930261774352	0.869958	0.9821086447545352	-5.49917
11:86007541-86031611:-	-0.401247	-0.0300557	-2.00882	0.0448568	0.14390336418700042	-4.24971	ENSG00000073921	PICALM	GBA_Control_v_Control	0.0887464	4.345829556316953	0.1546070345811915	0.8771667816412835	0.9826798758222193	-5.56865
3:71690009-71699708:-	-0.429496	-1.46691	-1.93214	0.053657	0.16261736909301305	-4.25889	ENSG00000285708,ENSG00000163412	AC097634.4,EIF4E3	GBA_Control_v_Control	-0.140043	2.0973865999685333	-0.277374	0.7815588333522652	0.9821086447545352	-5.50969
18:76849525-76855201:+	-0.449443	-3.22706	-1.88883	0.0592371	0.17267213020486386	-4.26	ENSG00000130856	ZNF236	GBA_Control_v_Control	0.20811869903122648	-1.65137	0.4413348253479191	0.6590796628841191	0.9579118935070294	-5.43798
22:40270121-40273600:+	-0.405659	-3.08806	-1.88528	0.0597163	0.1734508914538733	-4.26481	ENSG00000100354	TNRC6B	GBA_Control_v_Control	-0.547935	0.5551075825838163	-0.899029	0.36888444253461883	0.8801117196442911	-5.16662
4:102722870-102726683:-	-0.37074	-2.19025	-1.90266	0.0574052	0.16968909845325036	-4.26951	ENSG00000109323	MANBA	GBA_Control_v_Control	0.18712805323318893	3.0872730114170803	0.41464512348383853	0.6785033566916474	0.9579118935070294	-5.48529
8:119788337-119797846:-	-0.371378	-2.12759	-1.90296	0.0573661	0.16968909845325036	-4.27958	ENSG00000064313	TAF2	GBA_Control_v_Control	0.8604038344714335	1.3562620975897948	2.3279498125815126	0.0201419	0.5202819386389643	-3.24174
1:155921374-155921918:-	-0.327314	-1.85656	-1.91454	0.0558703	0.1667873286844698	-4.27994	ENSG00000132680	KHDC4	GBA_Control_v_Control	-0.44571	1.1831633859101123	-2.0142	0.0442942	0.641135	-3.80964
X:155545095-155548224:-	-0.356241	-2.09652	-1.88974	0.059115955598840336	0.17266515246081407	-4.29949	ENSG00000185973	TMLHE	GBA_Control_v_Control	-0.293851	1.5579535871784638	-0.877308	0.38056037463920944	0.8823077098619806	-5.19689
4:10097710-10103986:-	-0.33531	-1.26601	-1.91762	0.055477498919159124	0.16638094060758177	-4.30691	ENSG00000071127	WDR1	GBA_Control_v_Control	-0.143524	5.335156254985847	-0.531623	0.5951217924891865	0.937919	-5.46217
12:57945627-57953689:+	-0.448002	-3.10671	-1.85926	0.0633182	0.17958089492614376	-4.31035	ENSG00000166896	ATP23	GBA_Control_v_Control	-0.291321	-2.3744	-0.936621	0.3492117101329282	0.8638512846383748	-5.1764
19:49781756-49782724:+	-0.431796	-3.23558	-1.8585	0.0634255	0.17958089492614376	-4.31051	ENSG00000196961	AP2A1	GBA_Control_v_Control	-0.633213	1.345990880753758	-0.95534	0.33966980419339465	0.8605768339808534	-5.13484
3:17009673-17014911:+	-0.377143	-1.7457	-1.89835	0.0579713	0.17018782375238733	-4.31852	ENSG00000154822	PLCL2	GBA_Control_v_Control	-0.670363	-2.39768	-0.932219	0.3514804576020716	0.8653015957681498	-5.16829
1:233198938-233236980:-	-0.338946	-2.91118	-1.85646	0.0637162	0.18005934481656977	-4.31966	ENSG00000135749	PCNX2	GBA_Control_v_Control	0.639872	-1.87453	1.0235796570821951	0.30631678596325174	0.8559777364617792	-5.07959
16:89098590-89102759:+	-0.379308	-2.95703	-1.85581	0.063809	0.18005934481656977	-4.32116	ENSG00000176715	ACSF3	GBA_Control_v_Control	-0.473455	0.8228108511159368	-1.08275	0.27921801550415204	0.84418	-5.01561
17:81604547-81608822:-	-0.319364	-1.61784	-1.8969	0.0581631	0.170429	-4.32296	ENSG00000182446	NPLOC4	GBA_Control_v_Control	-0.325589	-0.460824	-0.517478	0.6049534692965963	0.937919	-5.39008
19:40582350-40583717:+	-0.387513	-3.2926	-1.84332	0.0656133	0.1816101713442712	-4.32944	ENSG00000160410	SHKBP1	GBA_Control_v_Control	-0.919587	1.913273947252936	-1.45565	0.14584889025495393	0.7773977356764051	-4.63034
19:18539370-18539720:-	-0.585784	-1.32789	-1.90325	0.0573348	0.16968909845325036	-4.33375	ENSG00000105701	FKBP8	GBA_Control_v_Control	-0.419408	7.400614757939367	-0.775654	0.43816264758151724	0.8938490480862389	-5.32392
X:101041316-101042312:-	-0.510383	-1.94025	-1.88457	0.0598142	0.1734508914538733	-4.33444	ENSG00000188917	TRMT2B	GBA_Control_v_Control	-1.00945	1.8843641364182306	-2.81969	0.00491569	0.3751564545874589	-2.18107
9:112268048-112297916:-	-0.380381	-2.57028	-1.85885	0.0633759	0.17958089492614376	-4.33502	ENSG00000243911,ENSG00000119314,ENSG00000230081	RN7SL430P,PTBP3,HSPE1P28	GBA_Control_v_Control	-0.172648	3.0918288933533216	-0.354703	0.7228979570437534	0.9670804091739919	-5.50615
10:21713771-21727928:+	-0.375522	-2.23693	-1.86505	0.0625012	0.17877267507155417	-4.33747	ENSG00000078403	MLLT10	GBA_Control_v_Control	0.0912915	-0.175207	0.1762463364646801	0.8601412057173852	0.9821086447545352	-5.48477
6:147205970-147239270:+	-0.413519	-2.73635	-1.84558	0.0652832	0.18147438115733694	-4.3398	ENSG00000164506	STXBP5	GBA_Control_v_Control	-0.802848	2.884275479894182	-1.43396	0.15194222494831575	0.786634	-4.66489
18:9182381-9221999:+	-0.414205	-1.32808	-1.89873	0.0579218	0.17018782375238733	-4.33986	ENSG00000101745,ENSG00000265257	ANKRD12,AP005263.1	GBA_Control_v_Control	0.9219599908884604	1.32748	1.5331226650464578	0.12560713975211293	0.7473876706656397	-4.53818
2:202755537-202759353:+	-0.379626	-2.85315	-1.84282	0.0656852	0.1816101713442712	-4.34501	ENSG00000138439	FAM117B	GBA_Control_v_Control	-0.0997541	0.549091	-0.243926	0.8073454320502707	0.9821086447545352	-5.47907
10:72340788-72341170:-	-0.371247	-2.60743	-1.84655	0.0651428	0.18138435811490544	-4.34589	ENSG00000148719	DNAJB12	GBA_Control_v_Control	-0.0549098	2.089299360061486	-0.133264	0.8940155909694701	0.9839569195536666	-5.52342
11:16183885-16186955:-	-0.361631	0.00188567	-1.95494	0.050900865334398054	0.1573896001776323	-4.34625	ENSG00000110693	SOX6	GBA_Control_v_Control	0.25993842583183113	-0.607775	0.6290016871960827	0.5295121411822084	0.9210556552849787	-5.32474
16:19616113-19616808:+	-0.351494	-2.90817	-1.83889	0.0662622	0.18164795108276083	-4.35035	ENSG00000103544	VPS35L	GBA_Control_v_Control	-0.100531	-0.667608	-0.265852	0.7904155856982464	0.9821086447545352	-5.47395
18:62072672-62095950:-	-0.358293	-1.35682	-1.89829	0.0579794	0.17018782375238733	-4.35256	ENSG00000197563	PIGN	GBA_Control_v_Control	0.9061414378910664	-0.440234	1.8761801861558307	0.0609633	0.648659	-4.02923
4:76124648-76144473:-	-0.389641	-3.06218	-1.837	0.0665417	0.18166418182756186	-4.35268	ENSG00000138750	NUP54	GBA_Control_v_Control	-0.974631	0.9153559652982991	-1.87783	0.060736980728511816	0.648659	-4.03103
3:71684571-71699708:-	-0.425934	-2.31834	-1.85409	0.0640551	0.1801481730021361	-4.35269	ENSG00000285708,ENSG00000163412	AC097634.4,EIF4E3	GBA_Control_v_Control	0.6687384364424487	-5.00863	1.8537137626041555	0.064168	0.648659	-4.16426
4:177353307-177360677:+	-0.260797	1.7254540315812137	-2.01623	0.0440746	0.14312076971455592	-4.35437	ENSG00000109674	NEIL3	GBA_Control_v_Control	0.3702138592330611	-3.49566	1.4108396813703428	0.15864720253338235	0.7871086807533572	-4.72698
14:92126121-92143294:+	-0.370281	-2.45273	-1.85188	0.0643726	0.18073850461233468	-4.35475	ENSG00000165934	CPSF2	GBA_Control_v_Control	-0.146513	1.389653049752066	-0.259799	0.7950796060909353	0.9821086447545352	-5.48642
12:42210354-42210680:-	-0.422614	-3.16789	-1.82935	0.0676798	0.1838743024527939	-4.35676	ENSG00000015153	YAF2	GBA_Control_v_Control	-0.53904	-0.572279	-1.14124	0.25408316024810856	0.842534	-4.96449
9:77337254-77371149:+	-0.377627	-2.46233	-1.84904	0.0647808	0.1809767133601669	-4.35742	ENSG00000197969	VPS13A	GBA_Control_v_Control	-0.439875	0.2978025197442779	-0.820888	0.4119337381335678	0.8827087649054147	-5.2176
10:22591628-22609717:-	-0.323419	-0.678664	-1.92427	0.054637014954784506	0.16528927587222197	-4.35934	ENSG00000150867	PIP4K2A	GBA_Control_v_Control	1.0466635382558351	0.9898536358604203	1.4085754188261017	0.15931601783503282	0.7871086807533572	-4.69396
9:123757702-123769563:-	-0.415915	-3.0867	-1.83169	0.0673301	0.1835182011559345	-4.36192	ENSG00000119522	DENND1A	GBA_Control_v_Control	0.073559	1.1531732515063065	0.1264887759721909	0.8993740953190515	0.9845051366625526	-5.50634
19:21033455-21034184:+	-0.464198	-2.4531	-1.84234	0.0657556	0.1816101713442712	-4.3625	ENSG00000118620	ZNF430	GBA_Control_v_Control	-0.152839	1.9807484583158033	-0.345944	0.7294677553283003	0.9673821440412214	-5.47312
8:58601284-58603386:-	-0.387514	-3.24985	-1.82212	0.0687698	0.1856694356903353	-4.36637	ENSG00000035681	NSMAF	GBA_Control_v_Control	0.20855442863211504	0.7106820335885211	0.4022700765487292	0.687584	0.9604432197693615	-5.43562
1:33294936-33295305:+	-0.298393	-1.65837	-1.86358	0.0627082	0.17905954665179347	-4.37167	ENSG00000160094	ZNF362	GBA_Control_v_Control	-0.21805	-0.177886	-1.35769	0.1749131658484461	0.7949283772014706	-4.72411
13:50027362-50045232:-	-0.425199	-1.95001	-1.85877	0.0633873	0.17958089492614376	-4.37209	ENSG00000231607	DLEU2	GBA_Control_v_Control	0.0239797	1.6958274177162667	0.051226924217715665	0.959156	0.9951955291565148	-5.52066
8:132722039-132757294:-	-0.278259	-1.19284	-1.88962	0.0591319	0.17266515246081407	-4.37486	ENSG00000165071	TMEM71	GBA_Control_v_Control	0.11664888798864137	2.9691332961713313	0.3692617913248299	0.7120219415403448	0.9633841297999743	-5.50348
14:49663314-49674427:-	-0.401457	-1.3349	-1.88511	0.0597391	0.1734508914538733	-4.37765	ENSG00000100479	POLE2	GBA_Control_v_Control	-0.229527	-3.48009	-0.701524	0.48316254891334753	0.9023692098170306	-5.3789
18:42027442-42049605:+	-0.418773	-2.49975	-1.8374	0.0664818	0.18166418182756186	-4.37875	ENSG00000078142	PIK3C3	GBA_Control_v_Control	-0.406369	0.5550419249594755	-0.713767	0.4755615724734018	0.8996202637244488	-5.29268
12:112502143-112506422:+	-0.394189	-1.49294	-1.87392	0.0612667	0.17584064001188887	-4.37904	ENSG00000179295	PTPN11	GBA_Control_v_Control	-0.0829553	2.0840141548875732	-0.248539	0.8037753536411909	0.9821086447545352	-5.5105
18:22989220-23001729:+	-0.394263	-3.10616	-1.81978	0.0691264	0.18599883903486464	-4.38217	ENSG00000101773	RBBP8	GBA_Control_v_Control	-0.0931185	-1.58314	-0.243082	0.8079991231663901	0.9821086447545352	-5.48047
12:82857009-82857580:+	-0.326273	-2.05177	-1.83929	0.0662041	0.18164795108276083	-4.38747	ENSG00000179104	TMTC2	GBA_Control_v_Control	0.3631432419254219	1.0874300006753714	1.046594082712889	0.29557586970218325	0.8541684771600098	-5.049
6:79042842-79060818:-	-0.417309	-2.78101	-1.82131	0.0688934	0.1856694356903353	-4.38826	ENSG00000146247	PHIP	GBA_Control_v_Control	-0.835152	1.7085195920741112	-1.53334	0.12555371341085514	0.7473876706656397	-4.53334
14:49602369-49608121:+	-0.353092	-1.79951	-1.85473	0.0639638	0.1801481730021361	-4.38862	ENSG00000165501	LRR1	GBA_Control_v_Control	-0.0833955	-0.054196	-0.246707	0.8051925528260502	0.9821086447545352	-5.46882
6:42676055-42679832:+	-0.383911	-2.09769	-1.84049	0.0660277	0.18164795108276083	-4.39006	ENSG00000024048	UBR2	GBA_Control_v_Control	-0.203571	2.8151512685602853	-0.414171	0.6788506539781991	0.9579118935070294	-5.48784
1:12001400-12002103:+	-0.473501	-2.59771	-1.82161	0.0688486	0.1856694356903353	-4.3905	ENSG00000116688	MFN2	GBA_Control_v_Control	-0.923751	1.9403450855652877	-1.77135	0.0768509	0.6675788786005744	-4.20324
17:4282797-4307123:-	-0.399668	-2.63321	-1.82243	0.0687229	0.1856694356903353	-4.39138	ENSG00000132388	UBE2G1	GBA_Control_v_Control	1.0005677885630917	-0.242725	1.833505602454823	0.067067	0.648659	-4.09409
6:49614686-49615771:-	-0.431045	-3.14317	-1.81133	0.070425	0.18858613462419907	-4.39434	ENSG00000112077	RHAG	GBA_Control_v_Control	-0.631053	-1.5754	-1.59762	0.1104885028898197	0.730176	-4.43958
3:148446265-148455531:-	-0.37996	-0.426176	-1.91409	0.0559269	0.1667873286844698	-4.39471	ENSG00000285557	AC069410.1	GBA_Control_v_Control	-0.574359	-1.58675	-1.37157	0.1705497868885373	0.7871086807533572	-4.71416
20:41533049-41551360:-	-0.260609	-0.393076	-1.90901	0.0565804	0.1681388516596508	-4.40133	ENSG00000124177	CHD6	GBA_Control_v_Control	0.4528910586979302	0.32501570649603323	0.7065150075204629	0.4800560293692987	0.9005743835877682	-5.30291
1:151166933-151167414:+	-0.283168	-0.0952406	-1.91749	0.055493345289008816	0.16638094060758177	-4.40332	ENSG00000163156	SCNM1	GBA_Control_v_Control	0.0344404	1.5056429320002767	0.3529086743353845	0.7242418705847267	0.9670804091739919	-5.4679
3:56660730-56673725:-	-0.371452	-0.978122	-1.88218	0.060136338744983496	0.17408433233246084	-4.40575	ENSG00000163946	TASOR	GBA_Control_v_Control	1.7637219638292807	1.0365902100298647	3.2535309285911596	0.0011835	0.269094	-1.08802
2:8943186-8974435:-	-0.313746	0.3723468202052511	-1.93296	0.053556656232034996	0.16260691828858365	-4.40585	ENSG00000143797	MBOAT2	GBA_Control_v_Control	-0.604377	-2.18425	-1.24328	0.21409643821963442	0.8059861096765057	-4.86889
8:140572811-140585311:-	-0.332521	-1.61947	-1.84983	0.0646677	0.18096189607124935	-4.41022	ENSG00000279766,ENSG00000123908	AC067931.1,AGO2	GBA_Control_v_Control	0.13507167604833636	-3.05672	0.20264635619377483	0.8394585691884165	0.9821086447545352	-5.52822
22:38494629-38501280:-	-0.401343	-3.02988	-1.80277	0.0717607	0.1912480784082201	-4.41095	ENSG00000100201	DDX17	GBA_Control_v_Control	-0.281837	3.856005165844527	-0.321517	0.7478955292876441	0.9772113569447117	-5.50583
16:31361835-31362753:+	-0.457042	-0.991813	-1.87751	0.0607748	0.1753279938305129	-4.41187	ENSG00000140678	ITGAX	GBA_Control_v_Control	-0.427899	4.5861748828664854	-1.99405	0.046456636032781815	0.641135	-3.87423
5:69174876-69175537:+	-0.489517	-1.73056	-1.8423	0.0657647	0.1816101713442712	-4.41601	ENSG00000134057	CCNB1	GBA_Control_v_Control	-0.10175	-1.1646	-0.436307	0.6627212465637853	0.9579118935070294	-5.41419
7:148832633-148847305:-	-0.407883	-3.09297	-1.7966	0.0727357	0.19292781209819837	-4.42013	ENSG00000106462	EZH2	GBA_Control_v_Control	-0.0814681	-3.38218	-0.217732	0.8276886573155064	0.9821086447545352	-5.58
2:8939820-8958642:-	-0.456704	-0.740204	-1.8782	0.0606807	0.1753279938305129	-4.42165	ENSG00000143797	MBOAT2	GBA_Control_v_Control	-0.844478	-1.97439	-1.65768	0.0977414	0.7013155416861646	-4.35748
5:79640850-79669028:+	-0.328241	-1.72978	-1.8385	0.0663194	0.18164795108276083	-4.42214	ENSG00000164329	TENT2	GBA_Control_v_Control	0.3722792332398477	-1.38531	0.5960302574242272	0.5513091770217328	0.9240336626802519	-5.36562
12:94169152-94186473:+	-0.376653	-1.11857	-1.86048	0.0631452	0.17958089492614376	-4.42573	ENSG00000136040	PLXNC1	GBA_Control_v_Control	0.4834458436900744	4.243529851908623	1.1103978362091884	0.26713270983266113	0.84418	-5.0534
2:189791789-189818180:+	-0.353964	-2.38542	-1.80841	0.0708787	0.18919757659230987	-4.426	ENSG00000064933	PMS1	GBA_Control_v_Control	0.9125441442670907	-0.775455	1.4838214915228811	0.13821643407011022	0.7663736145306105	-4.58072
3:196073929-196075360:-	-0.384394	-2.19363	-1.81725	0.0695128	0.18644094835093902	-4.42705	ENSG00000072274	TFRC	GBA_Control_v_Control	-1.57346	-1.05675	-2.20409	0.027777898964439825	0.6058918142876922	-3.47323
11:17336959-17337534:+	-0.503671	-3.1888	-1.78786	0.0741374	0.19609248384346487	-4.42788	ENSG00000070081	NUCB2	GBA_Control_v_Control	-0.409459	-1.85075	-1.04461	0.29649405685803354	0.8545498894132294	-5.05392
17:20204332-20205936:+	0.37351479129615894	-2.67988	1.799652214831403	0.0722522	0.19194836855469238	-4.43207	ENSG00000263494,ENSG00000128487	AC004702.1,SPECC1	GBA_Control_v_Control	0.2970878529892991	-2.76756	1.252414486270252	0.21075337460002241	0.8059861096765057	-4.885
4:17814852-17815358:+	-0.497429	-2.15937	-1.81054	0.0705499	0.18861984469975387	-4.43891	ENSG00000109805	NCAPG	GBA_Control_v_Control	-0.391495	-2.11623	-1.50312	0.13316927218723226	0.7579362983130947	-4.56508
10:45625950-45639963:-	-0.387194	-3.09873	-1.78297	0.0749304	0.1970655445805754	-4.44326	ENSG00000172671	ZFAND4	GBA_Control_v_Control	-0.573262	-0.218573	-1.30773	0.19130916100678708	0.8007786065832116	-4.78005
11:86012280-86031611:-	-0.412169	-2.94632	-1.78254	0.0749999	0.1970655445805754	-4.45001	ENSG00000073921	PICALM	GBA_Control_v_Control	-0.751019	1.4772665341435858	-1.09836	0.27234938073870835	0.84418	-5.01071
1:224189576-224190319:+	-0.393246	-3.09551	-1.77564	0.0761326	0.19756819402092987	-4.45108	ENSG00000143753	DEGS1	GBA_Control_v_Control	-0.724757	2.09257	-1.18302	0.2371214627919821	0.8307451706813072	-4.93585
6:158573419-158589782:+	-0.322332	-1.062	-1.85	0.0646424	0.18096189607124935	-4.45219	ENSG00000146433	TMEM181	GBA_Control_v_Control	0.11399098600910129	-0.201287	0.17661583337814368	0.8598510308281662	0.9821086447545352	-5.48978
8:61680967-61684188:-	-0.44293	-2.47992	-1.78514	0.0745774	0.19657058801455607	-4.4572	ENSG00000198363	ASPH	GBA_Control_v_Control	-0.0106646	2.085633310649609	-0.0221156	0.9823607713452711	0.9971506702600866	-5.53416
17:16101249-16101805:-	-0.275984	-1.25507	-1.83974	0.0661375	0.18164795108276083	-4.46335	ENSG00000141027	NCOR1	GBA_Control_v_Control	-0.147828	3.034287746976645	-0.497643	0.6188610384809872	0.937919	-5.4625
8:99274197-99275254:+	-0.374725	-2.90122	-1.76839	0.0773366	0.19976647769283873	-4.46652	ENSG00000132549	VPS13B	GBA_Control_v_Control	-0.0204448	-2.54913	-0.0325888	0.9740099127800099	0.996674	-5.53568
2:202464808-202467689:+	-0.443338	-2.59418	-1.77771	0.0757905	0.19743108512566332	-4.4678	ENSG00000204217	BMPR2	GBA_Control_v_Control	-0.393586	-0.648388	-1.08676	0.277442	0.84418	-5.00511
11:86011029-86031611:-	-0.344547	-0.478656	-1.87041	0.061753515254521434	0.1769354131609923	-4.47334	ENSG00000073921	PICALM	GBA_Control_v_Control	0.5255964469171847	-1.53716	0.7030117766082528	0.48223542864996405	0.9023692098170306	-5.29891
8:65725943-65726966:-	-0.405771	-3.13526	-1.76069	0.0786319	0.20270595126967036	-4.4759	ENSG00000205268	PDE7A	GBA_Control_v_Control	-1.28829	1.815226957314085	-2.03554	0.0420978	0.641135	-3.77822
1:20770929-20773610:-	-0.353537	-1.24059	-1.82946	0.0676626	0.1838743024527939	-4.48045	ENSG00000127483	HP1BP3	GBA_Control_v_Control	-0.822152	1.5442619247274085	-1.22045	0.2226230109371117	0.8059861096765057	-4.89471
15:65741714-65756472:-	-0.36367	-2.91559	-1.7602	0.0787161	0.20270595126967036	-4.48984	ENSG00000174485	DENND4A	GBA_Control_v_Control	0.15357567597066524	-3.14339	0.4149749306771091	0.6782619923522746	0.9579118935070294	-5.49789
5:66053405-66054951:+	-0.252845	-0.068926	-1.87588	0.0609971	0.1756674538573215	-4.49315	ENSG00000112851	ERBIN	GBA_Control_v_Control	0.18493116706934015	1.7205596937005598	0.45458073924629067	0.6495236562016606	0.9529980119380987	-5.45153
9:136224006-136226874:-	-0.393615	-1.96745	-1.77891	0.0755931	0.19743108512566332	-4.49376	ENSG00000165661	QSOX2	GBA_Control_v_Control	-0.591871	0.44842069748914665	-2.18636	0.029053392936758092	0.6058918142876922	-3.50465
1:58506059-58536741:-	-0.405485	-2.82479	-1.75274	0.0799882	0.20472581801880674	-4.49804	ENSG00000173406,ENSG00000162600	DAB1,OMA1	GBA_Control_v_Control	0.19320704518917164	-0.979185	0.27760795001851446	0.7813789119927494	0.9821086447545352	-5.46579
8:43059091-43064215:+	-0.389349	-1.80116	-1.78651	0.0743545	0.19629108119149288	-4.50355	ENSG00000254673,ENSG00000168522	AC110275.1,FNTA	GBA_Control_v_Control	0.6327168872190148	2.982014477719616	1.6490654406990564	0.0994932	0.7108472421263562	-4.40258
7:80646651-80674147:+	-0.375279	-1.95499	-1.77667	0.0759622	0.19743108512566332	-4.51818	ENSG00000135218	CD36	GBA_Control_v_Control	0.20122310411742994	-0.704645	0.2521884100843103	0.8009546667557901	0.9821086447545352	-5.4794
15:63706779-63716473:-	-0.388238	-1.93986	-1.77429	0.0763542	0.19783748965846024	-4.51821	ENSG00000103657	HERC1	GBA_Control_v_Control	-0.532809	-2.40179	-0.837012	0.4028143633677578	0.8827087649054147	-5.24838
3:18415110-18420991:-	-0.37772	-2.76889	-1.73942	0.0823051	0.20780491159911846	-4.52086	ENSG00000182568,ENSG00000131374	SATB1,TBC1D5	GBA_Control_v_Control	0.3086553677599708	1.4800790787230824	0.5925595757948015	0.5536290540881463	0.9250172658990637	-5.36994
17:75242335-75243570:-	-0.422416	-2.77859	-1.7386	0.0824482	0.20785352738312707	-4.52368	ENSG00000125447	GGA3	GBA_Control_v_Control	-0.447793	1.3226514131770741	-0.913284	0.36134476018616835	0.87511	-5.16561
20:49090741-49094963:+	-0.39354	-2.94662	-1.73608	0.0828942	0.2083523791099715	-4.52376	ENSG00000124207	CSE1L	GBA_Control_v_Control	0.9733212676111092	-0.517409	1.9663539179318261	0.049573525312192925	0.6433104567764992	-3.88237
2:26263379-26277160:+	-0.498502	-2.12618	-1.75714	0.0792393	0.2031699853053051	-4.53146	ENSG00000138029	HADHB	GBA_Control_v_Control	0.6740570426700803	-0.177447	1.091805212010955	0.2752192899110454	0.84418	-4.99984
6:158580939-158589782:+	-0.424056	-2.71035	-1.73187	0.0836417	0.2092912716459864	-4.53272	ENSG00000146433	TMEM181	GBA_Control_v_Control	0.3815617136831322	0.9756544800671232	0.6137017636113027	0.5395719459712376	0.9210556552849787	-5.3505
5:154033790-154034967:-	-0.471872	-2.44165	-1.74448	0.0814205	0.20712875469307623	-4.53495	ENSG00000055147	FAM114A2	GBA_Control_v_Control	0.38335917745170955	0.4535682763147145	0.7896657599963213	0.42993694853134035	0.8914236720134187	-5.24038
14:65455620-65458207:+	-0.56322	-1.43471	-1.77776	0.0757906	0.19743108512566332	-4.54002	ENSG00000033170	FUT8	GBA_Control_v_Control	-0.49918	-0.254791	-1.12923	0.2591090682904758	0.842534	-4.96601
3:71710411-71728623:-	-0.359813	-2.95897	-1.71872	0.0860111	0.21315591054937527	-4.54155	ENSG00000285708,ENSG00000163412	AC097634.4,EIF4E3	GBA_Control_v_Control	-0.445164	0.7493412517048684	-1.0755	0.2824493314919881	0.8441858999972556	-5.02051
19:21405128-21405856:+	0.48753685471498853	-1.42732	1.7809246261633025	0.0752679	0.19743108512566332	-4.54178	ENSG00000269237,ENSG00000196268	AC010615.4,ZNF493	GBA_Control_v_Control	1.0405968306527016	1.6129124584924543	2.4260432770167815	0.015465689020456688	0.5181226712443692	-3.04762
9:3647337-3651867:+	-0.368136	-1.82538	-1.757	0.0792593	0.2031699853053051	-4.54274	ENSG00000232104,ENSG00000237359	RFX3-AS1,AL354977.2	GBA_Control_v_Control	0.610111	-1.10834	2.896409086337082	0.00386862	0.3283825104480537	-2.00987
19:8455404-8463686:+	-0.431459	-2.25059	-1.74635	0.0810927	0.20692184218114176	-4.54285	ENSG00000099783	HNRNPM	GBA_Control_v_Control	-0.485611	3.435903221604778	-1.15617	0.24792588954690978	0.840945	-4.98825
X:13666316-13668383:+	-0.310894	-1.40097	-1.7877	0.0741624	0.19609248384346487	-4.5436	ENSG00000176896	TCEANC	GBA_Control_v_Control	-0.377614	-1.61005	-0.787339	0.4312964614656726	0.8914236720134187	-5.23472
1:88740987-88786213:+	-0.369332	-2.90464	-1.72101	0.0855939	0.21276441005622798	-4.54856	ENSG00000065243	PKN2	GBA_Control_v_Control	-0.198792	0.13017512875128062	-0.290971	0.7711427313814686	0.9821086447545352	-5.46511
1:212044659-212047417:+	-0.448485	-2.48689	-1.72698	0.0845174	0.21085393011703796	-4.55355	ENSG00000143476	DTL	GBA_Control_v_Control	-0.252517	-2.70479	-0.9742	0.33022631359971655	0.8605768339808534	-5.14375
2:169538012-169544835:-	-0.456996	-2.61444	-1.72064	0.0856633	0.21276441005622798	-4.56159	ENSG00000138399	FASTKD1	GBA_Control_v_Control	-0.449972	-0.608325	-1.05278	0.29273214629130156	0.8488726660157087	-5.03824
16:4466152-4469465:-	-0.359857	-2.61587	-1.71767	0.0862018	0.21315591054937527	-4.56177	ENSG00000153406	NMRAL1	GBA_Control_v_Control	-0.0377585	1.4310906532358922	-0.0914694	0.9271405955856318	0.9910670428565159	-5.51333
5:109713519-109716264:+	-0.381141	-1.90651	-1.74468	0.0813839	0.20712875469307623	-4.56213	ENSG00000112893	MAN2A1	GBA_Control_v_Control	-0.411013	0.0738882	-0.616593	0.537664	0.9210556552849787	-5.33916
17:62029540-62035608:-	-0.287441	-1.35582	-1.77719	0.0758761	0.19743108512566332	-4.56237	ENSG00000108510	MED13	GBA_Control_v_Control	-0.282305	-4.40702	-0.559844	0.5757328149809589	0.937919	-5.49477
17:7576810-7576952:+	-0.485848	-2.61636	-1.72152	0.0855038	0.21276441005622798	-4.5642	ENSG00000161960,ENSG00000238917,ENSG00000277957,ENSG00000264772	EIF4A1,SNORD10,SENP3-EIF4A1,AC016876.3	GBA_Control_v_Control	-0.471379	-0.190696	-0.972162	0.33123851578118846	0.8605768339808534	-5.17791
3:47425484-47428670:-	-0.412054	-2.00398	-1.7372	0.0826951	0.20816358221594702	-4.56552	ENSG00000114650	SCAP	GBA_Control_v_Control	-0.753516	-0.48667	-1.71093	0.0874481	0.6893205778776363	-4.27276
22:29970975-29998857:+	-0.368715	-2.9116	-1.71059	0.0875036	0.21512814611918535	-4.56686	ENSG00000100330	MTMR3	GBA_Control_v_Control	2.1336909948772877	-2.30469	2.944161635092585	0.003324	0.3283825104480537	-1.87805
16:23988507-24035547:+	-0.302522	-2.02199	-1.7311	0.0837788	0.20932240723182471	-4.57353	ENSG00000166501	PRKCB	GBA_Control_v_Control	0.8736284255229378	2.4094236226697685	1.4118391386920994	0.15835287945929521	0.7871086807533572	-4.70635
5:108348398-108367953:-	-0.407678	-3.19686	-1.6983	0.0897985	0.21725016583972678	-4.57482	ENSG00000145743	FBXL17	GBA_Control_v_Control	-0.0887704	0.25283096080577655	-0.166707	0.8676390814594109	0.9821086447545352	-5.48595
10:27165063-27165539:+	-0.480408	-2.96391	-1.69968	0.0895405	0.2169387632105527	-4.57564	ENSG00000120539	MASTL	GBA_Control_v_Control	-0.109879	-0.962897	-0.261882	0.7934739679725022	0.9821086447545352	-5.47626
7:73686635-73687095:+	-0.337388	-2.3299	-1.7122	0.0872063	0.2150065339298318	-4.57879	ENSG00000071462	BUD23	GBA_Control_v_Control	-0.090329	2.137074771855364	-0.253136	0.8002223252450166	0.9821086447545352	-5.50449
16:98144-100509:-	-0.390275	-0.28185	-1.81839	0.0693405	0.1862763199993356	-4.5815	ENSG00000103148	NPRL3	GBA_Control_v_Control	4.5607153487381424e-4	1.9409178643017462	0.00114082	0.9990900189698995	0.9996854242255431	-5.54781
1:29060421-29097935:+	-0.413029	-2.56945	-1.71054	0.0875119	0.21512814611918535	-4.58163	ENSG00000159023	EPB41	GBA_Control_v_Control	0.42120175168351937	1.9381938078820027	0.49399276135495523	0.6214352865710021	0.937919	-5.44525
3:155829687-155842619:-	-0.34148	-3.06763	-1.69236	0.0909255	0.218209	-4.5842	ENSG00000284952,ENSG00000169359	AC104472.3,SLC33A1	GBA_Control_v_Control	0.552592	-3.02906	0.9791260729197864	0.3277883506397373	0.8605768339808534	-5.18142
13:95161188-95166367:-	-0.389086	-2.62824	-1.70368	0.0887888	0.21668086561036384	-4.58981	ENSG00000125257	ABCC4	GBA_Control_v_Control	0.025845953644792807	-1.42804	0.0518331	0.9586735380693849	0.9951955291565148	-5.4947
2:15551492-15558634:-	-0.457548	-2.26485	-1.70808	0.0879691	0.21593582021776767	-4.59312	ENSG00000151779	NBAS	GBA_Control_v_Control	-0.140805	-0.446126	-0.265071	0.7910168896712192	0.9821086447545352	-5.46581
4:76134174-76144473:-	-0.36456	-1.60093	-1.7433	0.0816239	0.2072269415917682	-4.59346	ENSG00000138750	NUP54	GBA_Control_v_Control	0.0178048	0.3650013879104975	0.0544703	0.9565729352523418	0.9951955291565148	-5.49552
8:123077110-123097441:+	-0.321048	-2.62069	-1.69721	0.0900038	0.21743356731226365	-4.5956	ENSG00000156787	TBC1D31	GBA_Control_v_Control	-0.0486258	1.0713421470499578	-0.108624	0.9135252627900243	0.9869370526719986	-5.50475
1:12578717-12579412:-	-0.37994	-2.57365	-1.69524	0.0903773	0.21802234824191827	-4.59639	ENSG00000162496,ENSG00000276830	DHRS3,MIR6730	GBA_Control_v_Control	-0.37386	0.42263610867805146	-0.950218	0.3422637498023918	0.8605768339808534	-5.12269
15:41668827-41669958:+	-0.227539	0.7101992765085404	-1.84686	0.0650978	0.18138435811490544	-4.59747	ENSG00000174197	MGA	GBA_Control_v_Control	0.065832	2.1078585843748634	0.19443255131202394	0.8458823407772065	0.9821086447545352	-5.53139
15:40628069-40650819:+	-0.357478	-1.92246	-1.73302	0.0834362	0.2090887502670646	-4.60056	ENSG00000137812,ENSG00000259254	KNL1,AC022405.1	GBA_Control_v_Control	0.0815838	-5.23375	0.5386310321749563	0.5902822759979185	0.937919	-5.57657
14:72993142-72993357:-	-0.345586	-3.13456	-1.68059	0.0931905	0.22068659126023077	-4.60096	ENSG00000165861	ZFYVE1	GBA_Control_v_Control	0.0669266	-3.43519	0.13806646787706045	0.8902196558729214	0.9837948889599599	-5.58035
3:128262127-128264781:+	-0.319324	-2.40455	-1.69323	0.0907593	0.218209	-4.60332	ENSG00000132394	EEFSEC	GBA_Control_v_Control	-0.199081	-0.51582	-0.773633	0.43935665511629096	0.8938490480862389	-5.24841
8:30101897-30104486:+	-0.366735	-1.39282	-1.74084	0.0820556	0.20748700629621736	-4.60393	ENSG00000104660	LEPROTL1	GBA_Control_v_Control	0.2037823103752956	4.610735083325017	0.6869451857340284	0.49229927435369913	0.9093255174783328	-5.37779
21:33432176-33432871:+	-0.357543	-1.37623	-1.73453	0.0831682	0.20872844399497156	-4.60726	ENSG00000159128	IFNGR2	GBA_Control_v_Control	0.3134713314785882	3.828591161564529	0.8002897396423844	0.4237601934055689	0.8893667059099377	-5.30292
19:21744016-21745067:-	-0.386356	-3.13876	-1.6759	0.0941076	0.2215361150965589	-4.60892	ENSG00000197020	ZNF100	GBA_Control_v_Control	-0.9064	0.37006389543065793	-1.8111	0.070468	0.648659	-4.13319
1:77717866-77725762:-	-0.339969	-2.73789	-1.68643	0.0920607	0.21967476388936827	-4.60906	ENSG00000077254	USP33	GBA_Control_v_Control	0.32030231385915986	0.38308291790840054	0.5270825907757665	0.5982698524164686	0.937919	-5.38379
2:175111567-175121540:-	-0.284104	-1.37395	-1.75057	0.0803631	0.20537246293343878	-4.61344	ENSG00000115966	ATF2	GBA_Control_v_Control	0.25396633059411056	0.7416642760829161	0.4388449302911259	0.6608822514980333	0.9579118935070294	-5.43084
3:141260122-141287453:+	-0.349281	-2.9458	-1.67538	0.0942089	0.2215361150965589	-4.61465	ENSG00000155893	PXYLP1	GBA_Control_v_Control	-0.24092	-0.280968	-0.639257	0.522823	0.9210556552849787	-5.33
19:50398850-50399484:+	-0.234387	-0.585947	-1.7791	0.0755618	0.19743108512566332	-4.61484	ENSG00000062822	POLD1	GBA_Control_v_Control	-0.087202	1.2520985907711837	-0.787444	0.43123517833683567	0.8914236720134187	-5.25398
2:113830851-113831585:-	-0.386004	-2.22879	-1.69014	0.0913501	0.21879724600783482	-4.62099	ENSG00000244063,ENSG00000228857	AC104653.2,AC104653.1	GBA_Control_v_Control	0.0329681	-1.0991	0.12635194126392196	0.8994823583325524	0.9845051366625526	-5.50093
4:39733358-39745810:+	-0.412771	-2.34489	-1.69212	0.0909701	0.218209	-4.62138	ENSG00000078140	UBE2K	GBA_Control_v_Control	0.5352042915189743	-3.86324	1.115626477924396	0.26488837920380676	0.84418	-5.04611
12:111509548-111510582:-	-0.382856	-2.27274	-1.68742	0.0918716	0.21967476388936827	-4.62879	ENSG00000204842	ATXN2	GBA_Control_v_Control	0.0709948	-1.11553	0.1705820702456252	0.8645918363032746	0.9821086447545352	-5.48032
5:36953617-36976402:+	-0.212406	-0.726253	-1.77211	0.0767165	0.19846983562022355	-4.6338	ENSG00000164190	NIPBL	GBA_Control_v_Control	0.3048640061845569	0.4378573874858091	0.6179818197975778	0.5367481490600747	0.9210556552849787	-5.34714
7:104161071-104168525:-	-0.367117	-2.99201	-1.66075	0.0971135	0.2254239149154731	-4.64076	ENSG00000164815	ORC5	GBA_Control_v_Control	-0.182698	-1.38658	-0.358493	0.7200607287258638	0.9670804091739919	-5.44573
1:155721516-155726019:+	-0.362119	-2.21902	-1.68159	0.0929981	0.22063284479821865	-4.64118	ENSG00000132676	DAP3	GBA_Control_v_Control	0.00199023	2.4101498215293566	0.00515043	0.9958917408086907	0.9990718280437094	-5.54044
17:49311311-49312042:-	-0.360258	-1.66471	-1.70004	0.0894703	0.2169387632105527	-4.64176	ENSG00000198740	ZNF652	GBA_Control_v_Control	0.29610511761348013	0.9410502413332451	0.9557847998232268	0.3394449097493719	0.8605768339808534	-5.12426
11:73707419-73720899:-	-0.3993	-3.01533	-1.66006	0.0972531	0.2254239149154731	-4.64262	ENSG00000175582	RAB6A	GBA_Control_v_Control	-0.0266923	1.6018177376443183	-0.0461665	0.9631880493623208	0.9951955291565148	-5.52076
2:226864603-226914351:+	-0.246331	0.7714844671909402	-1.82672	0.0680753	0.18465011420343502	-4.64296	ENSG00000144468	RHBDD1	GBA_Control_v_Control	0.1685408993033657	-5.45503	0.5588219516598536	0.5778657922183259	0.937919	-5.57903
1:13730999-13742157:+	-0.478846	-2.80966	-1.66187	0.0968921	0.2254239149154731	-4.64562	ENSG00000116731	PRDM2	GBA_Control_v_Control	-0.454574	-1.31792	-0.83643	0.40314158514639875	0.8827087649054147	-5.25828
19:8551739-8553437:-	-0.356491	-2.94344	-1.65332	0.0986156	0.22775185264247946	-4.64822	ENSG00000142347	MYO1F	GBA_Control_v_Control	0.6910464688828419	3.095017521220181	0.9939497958182761	0.32052212132574653	0.8559777364617792	-5.13479
4:6923372-6924111:+	-0.20992	-0.821817	-1.74213	0.0818293	0.2072269415917682	-4.65009	ENSG00000132405	TBC1D14	GBA_Control_v_Control	-0.2701	4.528672407200741	-1.67029	0.0952185	0.6963735360482091	-4.38369
3:71015548-71053773:-	-0.327247	-3.23964	-1.64632	0.10004817634553287	0.22979601653098453	-4.65067	ENSG00000285708,ENSG00000114861	AC097634.4,FOXP1	GBA_Control_v_Control	-1.02308	0.9717831117527769	-1.7346	0.0831638	0.6837243181037749	-4.25185
4:152411302-152412529:-	-0.247879	2.142371155150542	-1.87399	0.061256989736732555	0.17584064001188887	-4.65401	ENSG00000109670	FBXW7	GBA_Control_v_Control	0.586744	-0.25124	1.3165019748918576	0.18835	0.8007786065832116	-4.77201
3:196064308-196069568:-	-0.374319	-1.62499	-1.70288	0.0889367	0.21672673132507267	-4.65536	ENSG00000072274	TFRC	GBA_Control_v_Control	0.6791584139715559	0.5860743669384049	1.0335679239418873	0.30162380704950015	0.8553046509813077	-5.06586
7:158788003-158799072:-	-0.33131	-0.696278	-1.74214	0.0818266	0.2072269415917682	-4.65691	ENSG00000117868	ESYT2	GBA_Control_v_Control	0.5977110222642401	2.0250340907270927	1.2080282863296654	0.22736281230073235	0.8139491723943062	-4.9262
3:43299753-43303792:+	-0.39399	-2.13299	-1.67872	0.0935554	0.2212387187627644	-4.65714	ENSG00000163788	SNRK	GBA_Control_v_Control	1.5848385098838387	2.7409478972306274	2.1052564217976624	0.0355535	0.6278743191681722	-3.66723
17:61776400-61780401:-	-0.317313	-1.61005	-1.69978	0.0895197	0.2169387632105527	-4.65853	ENSG00000136492	BRIP1	GBA_Control_v_Control	0.2688909977420726	-4.45663	0.7383117773944505	0.46052300484582886	0.8992031284658809	-5.40575
12:120782654-120791557:-	-0.265496	-1.50884	-1.70599	0.0883576	0.21625703987135048	-4.66014	ENSG00000157837	SPPL3	GBA_Control_v_Control	0.0775702	-1.17763	0.2933826942594076	0.7692991927385427	0.9821086447545352	-5.45981
1:171579353-171587751:+	0.3070783007698732	-2.31522	1.6758268795293907	0.0941213	0.2215361150965589	-4.66198	ENSG00000117523	PRRC2C	GBA_Control_v_Control	0.28261294737211884	2.4400222645390612	0.7103548666478282	0.47767340285572246	0.8996202637244488	-5.33203
9:133412298-133412921:-	-0.393771	-2.64877	-1.65039	0.0992147	0.22876585565871765	-4.66217	ENSG00000148300	REXO4	GBA_Control_v_Control	-0.23828	1.2516464061333121	-0.541977	0.5879725499866182	0.937919	-5.38835
5:94628810-94630743:+	-0.365086	-2.93259	-1.64557	0.10020381388905229	0.2298390758466104	-4.66269	ENSG00000133302	SLF1	GBA_Control_v_Control	0.7152931142212293	0.0305789	1.7519531711366365	0.0801322	0.6778632079304663	-4.21517
2:58221941-58232112:-	-0.409716	-1.73284	-1.68139	0.0930364	0.22063284479821865	-4.66602	ENSG00000115392	FANCL	GBA_Control_v_Control	0.2672277495865627	-1.23967	0.8187399660032781	0.4131576972651856	0.8827087649054147	-5.2229
17:42498923-42501304:+	-0.321555	0.5899508690115883	-1.80071	0.0720852	0.19180830071276866	-4.66672	ENSG00000033627	ATP6V0A1	GBA_Control_v_Control	0.3192974040942165	0.5313413921521651	1.2381073921359154	0.21600820032612103	0.8059861096765057	-4.85804
1:1804418-1817875:-	-0.308458	-2.01097	-1.67016	0.0952365	0.2226429552569186	-4.66932	ENSG00000078369	GNB1	GBA_Control_v_Control	0.5180830380334402	-0.866007	0.7621964060269262	0.44614821512351543	0.8946831700325871	-5.28322
20:44478623-44490111:+	0.4053347404844496	-2.47011	1.660829960951429	0.0970977	0.2254239149154731	-4.67796	ENSG00000124120	TTPAL	GBA_Control_v_Control	0.4007812453354873	-3.42093	0.9992838465360133	0.3179334993900691	0.8559777364617792	-5.16479
10:1056347-1072293:+	0.35070351769960095	-1.59595	1.6861827438791748	0.092109	0.21967476388936827	-4.67982	ENSG00000047056	WDR37	GBA_Control_v_Control	0.4840228155641842	1.3477336499873114	1.3137686907135344	0.18926843797938323	0.8007786065832116	-4.79363
9:85585462-85633374:-	-0.314997	-2.98495	-1.63104	0.10323378604291879	0.23454604433837706	-4.6806	ENSG00000135049	AGTPBP1	GBA_Control_v_Control	-0.158982	-4.35508	-0.30126	0.7632912286759947	0.9821086447545352	-5.60203
1:224365878-224371423:+	-0.33368	-2.62651	-1.63874	0.10161943592348309	0.23150479364386448	-4.68122	ENSG00000143771	CNIH4	GBA_Control_v_Control	0.42656385887875814	2.007755216347589	0.8339674455029248	0.40452696042853964	0.8827087649054147	-5.23127
4:76144148-76144473:-	-0.428972	-2.64987	-1.63975	0.10140892382662427	0.23150479364386448	-4.68237	ENSG00000138750	NUP54	GBA_Control_v_Control	0.0935854	0.210897	0.21456831130488666	0.8301539025628056	0.9821086447545352	-5.48708
17:60265411-60294801:-	-0.322836	-2.02622	-1.67045	0.0951809	0.2226429552569186	-4.68421	ENSG00000170832	USP32	GBA_Control_v_Control	0.14708787320519967	3.3869370530536416	0.27954	0.7798965711736514	0.9821086447545352	-5.53723
10:97437190-97437750:-	-0.435849	-2.9246	-1.63004	0.10344605529241631	0.23459713861029233	-4.68488	ENSG00000171311	EXOSC1	GBA_Control_v_Control	-0.707831	1.1430745686085844	-1.22683	0.22021629592239125	0.8059861096765057	-4.88112
5:57246299-57247215:+	-0.394399	-2.65926	-1.64019	0.10131667610185956	0.23150479364386448	-4.68554	ENSG00000062194	GPBP1	GBA_Control_v_Control	0.0805737	2.4725116284944053	0.1253935477426568	0.9002408026212111	0.9846933600006602	-5.52884
16:30496096-30496566:+	-0.475225	-1.02926	-1.71356	0.0869624	0.21472047636499697	-4.69535	ENSG00000005844	ITGAL	GBA_Control_v_Control	0.32230852315815905	2.9225862516535575	0.8954334569605449	0.3708017064968646	0.880588	-5.2232
1:246627355-246631924:+	-0.32241	-2.75698	-1.62586	0.10433196773945475	0.23481685500609184	-4.69683	ENSG00000162852	CNST	GBA_Control_v_Control	0.04864	0.15805520337618795	0.0943574	0.9248468920205406	0.9901957757251683	-5.49531
18:24064139-24083081:+	-0.394898	-2.04126	-1.6486	0.0995806	0.22903535833553537	-4.70059	ENSG00000168234	TTC39C	GBA_Control_v_Control	0.35384554382602484	1.5668869136367247	0.7314516929649292	0.46469915971369824	0.8992031284658809	-5.29428
16:87975047-87984259:+	-0.31824	-1.22788	-1.6921	0.0909745	0.218209	-4.70138	ENSG00000172530	BANP	GBA_Control_v_Control	0.20947715104318965	2.848926401849634	0.5804938274188528	0.5617311283603394	0.9294320749720268	-5.41594
11:66639699-66640123:+	-0.467173	-3.1465	-1.61108	0.10751751574545813	0.24005572996891514	-4.70431	ENSG00000173933,ENSG00000248643	RBM4,RBM14-RBM4	GBA_Control_v_Control	-0.653476	2.6095496565959055	-0.783908	0.4333062070814292	0.8926639529935211	-5.27885
15:65722847-65732818:-	-0.265277	-1.10989	-1.70371	0.0887824	0.21668086561036384	-4.70596	ENSG00000174485	DENND4A	GBA_Control_v_Control	0.2229899547273977	-5.13506	0.6705969232922903	0.5027553428929186	0.9155382003440459	-5.4531
19:14042452-14042789:+	-0.377925	-3.12548	-1.60864	0.10804770794860417	0.24091912569150914	-4.71069	ENSG00000104998	IL27RA	GBA_Control_v_Control	-0.936898	0.8804755362350449	-1.69516	0.0904002	0.6963735360482091	-4.30273
1:212863724-212872818:+	-0.278334	-1.86975	-1.65896	0.0974734	0.2254239149154731	-4.71265	ENSG00000162769	FLVCR1	GBA_Control_v_Control	0.36074118347837647	-0.335037	0.7121562412539083	0.47655788948405653	0.8996202637244488	-5.28389
15:93000511-93009323:+	-0.35117	-2.56175	-1.62819	0.10383728654112258	0.23459713861029233	-4.7133	ENSG00000173575	CHD2	GBA_Control_v_Control	-0.070089	0.0779997	-0.113786	0.9094334027485902	0.9869370526719986	-5.49401
1:1815755-1839238:-	-0.318309	-2.10474	-1.63946	0.1014697016751718	0.23150479364386448	-4.71638	ENSG00000078369	GNB1	GBA_Control_v_Control	0.7621715668524592	1.7815775959833862	1.4904877925946423	0.13645644286667258	0.7650962016613404	-4.59062
6:13639562-13644729:-	-0.355678	-0.981215	-1.70195	0.0891115	0.21683803777314697	-4.71859	ENSG00000010017	RANBP9	GBA_Control_v_Control	0.0947125	2.1029455635302803	0.29226268726026294	0.7701550684372951	0.9821086447545352	-5.50516
7:77778337-77778814:+	-0.411731	-2.36598	-1.62444	0.10463343524710497	0.23518010412301105	-4.72371	ENSG00000187257	RSBN1L	GBA_Control_v_Control	-0.102844	1.6342232677863409	-0.179524	0.8575674982100591	0.9821086447545352	-5.5072
20:50127974-50130947:-	-0.302275	-2.88853	-1.60166	0.10958449867618897	0.24402171522191152	-4.72626	ENSG00000124208,ENSG00000240849	TMEM189-UBE2V1,TMEM189	GBA_Control_v_Control	-0.961106	-0.274824	-2.55587	0.010760288093477613	0.4640552493031974	-2.77703
9:83677726-83686155:-	-0.325401	-2.44192	-1.62108	0.1053518112406339	0.23584758809736575	-4.72688	ENSG00000135018	UBQLN1	GBA_Control_v_Control	-0.0422811	-0.472099	-0.0750724	0.9401742456251971	0.9925242669922577	-5.4911
11:85981128-86031611:-	-0.318931	-2.37298	-1.61366	0.10695436096440274	0.23911634095769932	-4.74234	ENSG00000073921	PICALM	GBA_Control_v_Control	0.43292264252789947	-4.11476	0.6520068972132758	0.514584	0.9210556552849787	-5.45561
9:33351559-33352719:+	-0.362764	-3.07626	-1.58536	0.11323683379292104	0.24918039834641473	-4.74373	ENSG00000086102	NFX1	GBA_Control_v_Control	-0.656375	-0.171747	-1.46422	0.14349402258032581	0.7727919682936442	-4.60423
6:158573419-158608750:+	-0.312488	-3.12469	-1.58564	0.11317435489993007	0.24918039834641473	-4.74522	ENSG00000146433	TMEM181	GBA_Control_v_Control	-0.845279	-3.02397	-1.43149	0.1526459156293033	0.786634	-4.68715
2:230442936-230450255:+	-0.513982	-1.24491	-1.6627	0.0967308	0.2254239149154731	-4.74814	ENSG00000067066	SP100	GBA_Control_v_Control	-0.584484	3.8696653063947286	-0.840123	0.4010686648619791	0.8827087649054147	-5.26777
8:51845660-51861246:-	-0.302874	-0.924383	-1.68501	0.0923345	0.2199002257885948	-4.74889	ENSG00000168300	PCMTD1	GBA_Control_v_Control	0.7708049839896347	1.2951653255087776	1.1348516155420267	0.2567483087552075	0.842534	-4.98418
22:50372019-50394135:+	-0.307777	-0.783882	-1.68354	0.0926201	0.22026783396141325	-4.75158	ENSG00000100239	PPP6R2	GBA_Control_v_Control	0.36100190084608297	1.7580743590061259	0.9935935221761195	0.32069551166470284	0.8559777364617792	-5.11453
2:210153494-210154611:-	-0.329875	-3.04686	-1.58572	0.11315516502244552	0.24918039834641473	-4.75195	ENSG00000144445	KANSL1L	GBA_Control_v_Control	0.7614995461127991	0.15577849222580084	1.283360826976354	0.1997055108443442	0.802695	-4.81008
6:144487547-144493456:+	-0.357983	-2.88894	-1.58694	0.11287897707344759	0.24918039834641473	-4.75414	ENSG00000152818	UTRN	GBA_Control_v_Control	-0.222415	3.323630764437238	-0.336044	0.736918	0.9689005112781153	-5.51292
12:69589484-69593613:+	-0.332787	-1.44281	-1.64984	0.0993272	0.22876585565871765	-4.75518	ENSG00000166226	CCT2	GBA_Control_v_Control	-0.803153	2.1736389223021764	-1.87831	0.060671154084096915	0.648659	-4.04489
20:60180049-60180913:+	-0.392601	-2.99674	-1.57907	0.11467224451957266	0.2511163481389032	-4.75631	ENSG00000228340	MIR646HG	GBA_Control_v_Control	0.19848961377115337	-1.15439	0.4025081661825361	0.6874084023074647	0.9604432197693615	-5.45058
1:155438326-155439068:-	-0.249265	-1.08815	-1.66963	0.0953426	0.2226429552569186	-4.75825	ENSG00000116539	ASH1L	GBA_Control_v_Control	1.4936195132421517	-1.66613	2.395180767954978	0.016821535107858724	0.5181226712443692	-3.10775
4:177351379-177353728:+	-0.351312	-2.37719	-1.59741	0.11052680050140601	0.24567992352139703	-4.7635	ENSG00000109674	NEIL3	GBA_Control_v_Control	0.14302408887610873	-2.35164	0.4090552932329758	0.6825991963314206	0.9579118935070294	-5.45805
12:26979783-26990627:-	-0.308936	-2.81349	-1.57743	0.11504950417467287	0.25148054071345943	-4.76624	ENSG00000064115	TM7SF3	GBA_Control_v_Control	-0.530451	0.8626715290548722	-1.23419	0.21746363884566466	0.8059861096765057	-4.87024
20:2947981-2965202:+	-0.271216	-0.234533	-1.70698	0.0881717	0.2161172142097371	-4.76846	ENSG00000132670	PTPRA	GBA_Control_v_Control	0.3106514786047616	-4.82623	1.3111299148744124	0.19016577222686556	0.8007786065832116	-4.90744
7:104188250-104204234:-	-0.368658	-3.1165	-1.57426	0.11578125134357582	0.25246327403358937	-4.7686	ENSG00000164815	ORC5	GBA_Control_v_Control	-0.279601	0.33975473506135023	-0.555167	0.57892263954841094	0.937919	-5.37219
1:47287550-47295848:-	-0.361595	-3.09507	-1.57324	0.11601698498681633	0.25264918001668557	-4.7694	ENSG00000123473	STIL	GBA_Control_v_Control	0.23157395678049442	-3.34091	0.5484170488011185	0.5835454792097858	0.937919	-5.4337
8:100706650-100706997:-	-0.540158	-2.51673	-1.5888	0.1124657183465584	0.2487878011908716	-4.77119	ENSG00000070756	PABPC1	GBA_Control_v_Control	-0.702275	1.5766166313133108	-0.872754	0.38303681106151133	0.8823077098619806	-5.21533
14:22926132-22927660:-	-0.327247	-2.63073	-1.58034	0.11438328299887474	0.25104514007204015	-4.7715	ENSG00000100462	PRMT5	GBA_Control_v_Control	-0.0054398	0.9905513676048483	-0.0140542	0.9887899775962397	0.9983032906699255	-5.50758
17:27303366-27309272:+	-0.323693	-2.75399	-1.57229	0.11623717057859036	0.25280078938012074	-4.77752	ENSG00000109046	WSB1	GBA_Control_v_Control	0.7001251814921892	-1.05317	0.820771	0.4120003908396003	0.8827087649054147	-5.21691
X:2211488-2221229:-	0.3148466269883601	-0.761139	1.6740820762623256	0.0944637	0.2216821962767643	-4.78593	ENSG00000169084	DHRSX	GBA_Control_v_Control	0.4654024486720192	0.7771537328586494	2.0133008764543128	0.0443887	0.641135	-3.80952
3:20125904-20140364:+	-0.328247	-3.11322	-1.56078	0.11892883988289814	0.2573215491796211	-4.78692	ENSG00000114166,ENSG00000266745	KAT2B,MIR3135A	GBA_Control_v_Control	-0.360561	-0.418834	-0.44716	0.6548705541098842	0.9552803304522115	-5.41214
3:170122590-170129552:-	-0.338253	-3.17811	-1.56308	0.1183860098954319	0.25680507343907405	-4.7883	ENSG00000173889	PHC3	GBA_Control_v_Control	0.21984985694789572	-0.155659	0.3694180865906602	0.7119055094310842	0.9633841297999743	-5.45293
5:134741062-134744052:+	-0.295172	-1.47651	-1.6226	0.10502782115957536	0.2354361972322123	-4.79083	ENSG00000164615	CAMLG	GBA_Control_v_Control	-0.0353278	2.4098279691764377	-0.142501	0.8867172738268195	0.9837948889599599	-5.53498
3:4410864-4420146:-	-0.318739	-2.69437	-1.56379	0.1182206332380451	0.2567819446399453	-4.79131	ENSG00000234325,ENSG00000144455	MRPS10P2,SUMF1	GBA_Control_v_Control	-0.0748413	2.0207592011781323	-0.149259	0.8813832783203439	0.9826798758222193	-5.5177
14:65430215-65455718:+	-0.402223	-3.12958	-1.55667	0.11990275850725739	0.258532	-4.7926	ENSG00000033170	FUT8	GBA_Control_v_Control	-0.086794	-2.72319	-0.234489	0.8146604601019777	0.9821086447545352	-5.53701
16:87748672-87762040:-	-0.341111	-2.60828	-1.5596	0.1192089669940696	0.25759569573107194	-4.79757	ENSG00000104731	KLHDC4	GBA_Control_v_Control	-0.0374207	1.9307888797488475	-0.0840567	0.9330305867866349	0.9915398309595024	-5.52107
3:194459470-194462236:-	-0.371422	-3.07764	-1.5517	0.12108793831163239	0.26043	-4.79788	ENSG00000133657	ATP13A3	GBA_Control_v_Control	-0.282409	0.9055911985320432	-0.540621	0.5889063728979915	0.937919	-5.38374
X:47846104-47895940:+	-0.336346	-2.19572	-1.57889	0.11471485349764071	0.2511163481389032	-4.79932	ENSG00000197779	ZNF81	GBA_Control_v_Control	-0.070566	1.414072567177952	-0.223921	0.8228709342978076	0.9821086447545352	-5.49405
17:32173830-32175362:+	-0.431562	-2.92955	-1.55148	0.12114111950286903	0.26043	-4.80251	ENSG00000126858	RHOT1	GBA_Control_v_Control	-0.648974	1.229407120158211	-0.951864	0.3414290198268837	0.8605768339808534	-5.14279
3:197866111-197871462:+	-0.345849	-3.06907	-1.54556	0.12256509679571967	0.2625831987151622	-4.80663	ENSG00000186001	LRCH3	GBA_Control_v_Control	-0.705546	0.5060861326620142	-1.41245	0.1581716727180687	0.7871086807533572	-4.66787
1:158654810-158654951:-	-0.457421	-1.6418	-1.59701	0.11062181190123656	0.24567992352139703	-4.80802	ENSG00000163554	SPTA1	GBA_Control_v_Control	-0.524199	-3.64633	-2.22213	0.0265293	0.6019291919756055	-3.4584
5:66021321-66054951:+	-0.315086	-3.22439	-1.53784	0.12444052586715036	0.2654836631905279	-4.8111	ENSG00000112851	ERBIN	GBA_Control_v_Control	0.7605732495564368	-0.949944	1.0468464290122301	0.2954595298422891	0.8541684771600098	-5.04413
3:196053417-196077122:-	-0.30424	0.6387813351748176	-1.71785	0.0861699	0.21315591054937527	-4.81644	ENSG00000072274	TFRC	GBA_Control_v_Control	-0.0309267	-5.32448	-0.106056	0.9155899018873255	0.9873316925297492	-5.70859
10:16752538-16764510:-	-0.344085	-2.80948	-1.54536	0.12261180928688933	0.2625831987151622	-4.82049	ENSG00000148484	RSU1	GBA_Control_v_Control	-0.371135	0.7878508505667975	-0.618393	0.5364771384030351	0.9210556552849787	-5.34407
14:30580863-30581116:+	-0.382757	-2.87355	-1.54125	0.12360909439526487	0.2643817445728022	-4.82562	ENSG00000092140	G2E3	GBA_Control_v_Control	-0.0259928	-0.0313349	-0.0530365	0.9577149638962597	0.9951955291565148	-5.4989
21:46349011-46349820:+	-0.406816	-1.06057	-1.62356	0.10482431086326086	0.23529414163023393	-4.83133	ENSG00000160299	PCNT	GBA_Control_v_Control	-0.0323022	1.423451609451542	-0.129754	0.8967912014977812	0.9839569195536666	-5.51222
13:20731840-20732121:-	-0.406722	-2.36488	-1.54763	0.12206602607675718	0.2620829383412728	-4.83239	ENSG00000150456	EEF1AKMT1	GBA_Control_v_Control	0.4393960159416812	-1.23754	1.7153526713047609	0.0866345	0.6861287250513269	-4.27604
9:77238001-77260224:+	-0.303935	-3.10846	-1.52694	0.12712954253150188	0.26916835045446613	-4.83483	ENSG00000197969	VPS13A	GBA_Control_v_Control	-0.741511	-1.09247	-1.33295	0.18289457992133606	0.8007786065832116	-4.75038
1:95143890-95152580:+	-0.342991	-2.80916	-1.5315	0.1259999212231656	0.26779	-4.83577	ENSG00000271092,ENSG00000152078	TLCD4-RWDD3,TLCD4	GBA_Control_v_Control	0.12950252069361312	-5.0958	0.7717825923736389	0.4404515045337375	0.8938490480862389	-5.43909
16:70565064-70567536:+	-0.39015	-1.9935	-1.56245	0.11853718398766075	0.25680507343907405	-4.8406	ENSG00000189091	SF3B3	GBA_Control_v_Control	0.10478489461510243	1.7614165003626707	0.20249633512447482	0.8395758015665241	0.9821086447545352	-5.51012
18:21765771-21779685:+	-0.283583	-0.50692	-1.63897	0.10156990032643208	0.23150479364386448	-4.84415	ENSG00000101752	MIB1	GBA_Control_v_Control	0.45181692850316946	1.1728135649921965	1.1048405788983133	0.2695324171636049	0.84418	-5.00616
9:33971650-33973237:-	-0.276175	-1.08978	-1.62822	0.10383063133607343	0.23459713861029233	-4.8444	ENSG00000137073	UBAP2	GBA_Control_v_Control	0.9895687634205985	-1.24314	1.5145994985940685	0.13023502720768346	0.7540158989024156	-4.5401
14:71413947-71414680:+	-0.323564	-2.55726	-1.52818	0.12682166220466143	0.2688555187394274	-4.8503	ENSG00000197555	SIPA1L1	GBA_Control_v_Control	0.17528087242907375	-0.0076584	0.5264942294495721	0.5986782868520415	0.937919	-5.38917
6:53071056-53076543:+	-0.406675	-2.72623	-1.52599	0.1273656064273993	0.2693285304680144	-4.85047	ENSG00000112146	FBXO9	GBA_Control_v_Control	-0.0642837	2.852782896350185	-0.107665	0.914286	0.9869370526719986	-5.54608
11:108176245-108177090:-	-0.425623	-2.99267	-1.51191	0.1309098023738132	0.27543553657347414	-4.85552	ENSG00000149308	NPAT	GBA_Control_v_Control	0.7489369405359545	-2.8291	1.6261933889445976	0.10426862614447756	0.730176	-4.43753
22:45178237-45178900:+	-0.445426	-0.782921	-1.63143	0.1031578154068261	0.23454604433837706	-4.86087	ENSG00000093000	NUP50	GBA_Control_v_Control	0.19846840312059355	2.471970656615977	0.47450616819847335	0.6352574096856682	0.9438913193471123	-5.45861
20:56381432-56384324:-	-0.299259	-0.610446	-1.62676	0.10414038751311101	0.23470028273089047	-4.86234	ENSG00000087586	AURKA	GBA_Control_v_Control	-0.342432	-1.40758	-1.09466	0.2739679616957385	0.84418	-5.00616
15:76274411-76295737:-	-0.310788	-2.2783	-1.53619	0.12484494866837445	0.26600846296218367	-4.86376	ENSG00000140374	ETFA	GBA_Control_v_Control	0.572004	-1.13789	0.7517116728160007	0.4524266321828897	0.8979383035689463	-5.26272
8:123077110-123109620:+	-0.265597	-2.11254	-1.5406	0.12376758669316984	0.26438394154940476	-4.86409	ENSG00000156787	TBC1D31	GBA_Control_v_Control	-0.621319	-0.714822	-1.28836	0.19796153940284233	0.8009094570057164	-4.80135
19:1032391-1032696:+	-0.366147	-2.73852	-1.51112	0.1311096943647003	0.275502	-4.86574	ENSG00000064666	CNN2	GBA_Control_v_Control	0.6864806593850521	2.3971641565034543	0.8782643046516893	0.3800414258601752	0.8823077098619806	-5.21949
4:15625251-15644708:-	-0.318694	-2.73342	-1.5105	0.13126956962944752	0.275502	-4.86835	ENSG00000118564	FBXL5	GBA_Control_v_Control	0.19992995448376227	4.6364199263122545	0.26425420627013035	0.7916462783957878	0.9821086447545352	-5.53232
4:55411613-55417985:+	-0.346484	0.11281383921148962	-1.65925	0.0974177	0.2254239149154731	-4.8706	ENSG00000134851,ENSG00000239040	TMEM165,Y_RNA	GBA_Control_v_Control	-0.172997	3.3067546309600595	-0.527806	0.5977675607066288	0.937919	-5.45443
5:73074741-73077493:+	-0.297325	0.5767399565053073	-1.67584	0.0941178	0.2215361150965589	-4.87214	ENSG00000157107	FCHO2	GBA_Control_v_Control	0.20964529802709797	-4.39695	0.5011328621672446	0.6164087731542224	0.937919	-5.53512
9:77238001-77238386:+	-0.310041	-3.14449	-1.49228	0.1359777829488259	0.28220852604583274	-4.87559	ENSG00000197969	VPS13A	GBA_Control_v_Control	-0.00969871	0.903731	-0.0192089	0.9846788631871493	0.9971506702600866	-5.51298
7:16258389-16278226:-	-0.397307	-1.97065	-1.52914	0.12658534122983664	0.268694	-4.87846	ENSG00000214960	CRPPA	GBA_Control_v_Control	0.7506351986626831	-4.37046	2.413817282167637	0.0159908	0.5181226712443692	-3.09283
16:297055-298251:-	-0.306082	-2.84661	-1.49855	0.13434390720321804	0.2799930771498158	-4.87916	ENSG00000103126	AXIN1	GBA_Control_v_Control	-0.650524	0.00652771	-1.62512	0.10449698892815984	0.730176	-4.39592
1:44308309-44339322:-	-0.287185	-2.91451	-1.49112	0.13628135225566337	0.28248937091019605	-4.88792	ENSG00000117419	ERI3	GBA_Control_v_Control	-0.516623	0.12372177464053495	-1.19144	0.2338021431303872	0.8299234636700213	-4.90353
1:53818970-53832591:-	-0.324698	-2.86775	-1.4825	0.1385581472370621	0.28579745603320306	-4.90067	ENSG00000058804	NDC1	GBA_Control_v_Control	-0.825139	-0.949706	-1.72469	0.0849369	0.6837243181037749	-4.26484
22:31258290-31260077:+	-0.34727	-2.86115	-1.48111	0.13892812412721314	0.2862089820976575	-4.90156	ENSG00000182541	LIMK2	GBA_Control_v_Control	-0.3291	2.7988670251204306	-0.514372	0.6071221699363469	0.937919	-5.42581
2:230440475-230450255:+	-0.376136	-3.05443	-1.4725	0.1412362457630418	0.28789890102595406	-4.90979	ENSG00000067066	SP100	GBA_Control_v_Control	-0.488685	-0.451208	-0.861448	0.3892271852414969	0.8825577718216362	-5.19595
8:668597-674047:-	-0.358444	-0.737702	-1.58286	0.1138089773161463	0.25011161376153096	-4.91157	ENSG00000104714	ERICH1	GBA_Control_v_Control	0.21300890496154956	2.856049008223538	0.6249051444689605	0.5321962536354341	0.9210556552849787	-5.38997
12:350620-366104:-	-0.314313	-2.4736	-1.49008	0.13655536823195855	0.28270833940993634	-4.91317	ENSG00000073614	KDM5A	GBA_Control_v_Control	-0.474364	3.2537071741424195	-0.776625	0.43758982309887073	0.8938490480862389	-5.30693
8:140864311-140890769:-	-0.310898	-3.14582	-1.46674	0.14279824422280124	0.29026422766353904	-4.91402	ENSG00000169398	PTK2	GBA_Control_v_Control	-0.130716	-0.0132117	-0.306959	0.7589473513424158	0.9809642824510516	-5.46106
15:66535932-66546705:+	-0.331258	-2.93565	-1.47258	0.14121493197777923	0.28789890102595406	-4.92074	ENSG00000174442	ZWILCH	GBA_Control_v_Control	-0.10045	-1.30169	-0.26889	0.7880777694223797	0.9821086447545352	-5.46681
18:12999420-13019206:+	-0.28647	0.17472188204536038	-1.62763	0.10395489644196396	0.23459713861029233	-4.92203	ENSG00000101639	CEP192	GBA_Control_v_Control	-0.112076	3.511920578114989	-0.719268	0.47216800839059214	0.8996202637244488	-5.35256
3:196806578-196812851:+	-0.341237	-2.68932	-1.4723	0.14129165839510788	0.28789890102595406	-4.9273	ENSG00000180370	PAK2	GBA_Control_v_Control	-0.907669	2.2354932348749563	-1.58671	0.11293917177216627	0.7321423529168616	-4.47299
5:73078179-73082825:+	-0.349377	-2.27996	-1.48557	0.13774527861548438	0.28447026174095724	-4.93448	ENSG00000157107	FCHO2	GBA_Control_v_Control	0.0637537	-0.391861	0.16500485885815713	0.868978	0.9821086447545352	-5.4856
15:63532646-63563008:+	-0.328566	-2.6695	-1.46328	0.14374191974754327	0.29104221826921894	-4.93679	ENSG00000140455	USP3	GBA_Control_v_Control	1.355669706333507	-0.861519	1.8256881039299089	0.068238	0.648659	-4.10908
2:68490189-68545312:+	-0.279531	-2.37766	-1.47263	0.14120251178269386	0.28789890102595406	-4.94049	ENSG00000169621	APLF	GBA_Control_v_Control	-0.107873	-0.394226	-0.376688	0.70649669889253075	0.9633841297999743	-5.4414
3:152445281-152447773:+	-0.270165	-2.32509	-1.47361	0.14093726129552597	0.28789890102595406	-4.94145	ENSG00000152601	MBNL1	GBA_Control_v_Control	0.4989210262881212	3.0885192085884756	0.9187982223981983	0.3584543523306194	0.8725475282181483	-5.2008
5:71509464-71511151:+	-0.351523	-3.19931	-1.44063	0.15004	0.299902	-4.94982	ENSG00000145734	BDP1	GBA_Control_v_Control	-0.611228	-0.746281	-1.06316	0.2880008587347818	0.8463996107562392	-5.02794
1:173992754-173993135:-	-0.320353	-2.11878	-1.47356	0.1409508593257823	0.28789890102595406	-4.95128	ENSG00000135870	RC3H1	GBA_Control_v_Control	0.5945733693035291	3.0343891515654047	1.37345	0.16996504500486534	0.7871086807533572	-4.75201
10:103439745-103440850:+	-0.329759	-3.00507	-1.44197	0.1496597607133882	0.2994979001642179	-4.95156	ENSG00000148843	PDCD11	GBA_Control_v_Control	-0.276843	0.34572930013486325	-0.582901	0.56011	0.9283558963272281	-5.36643
12:112306063-112319742:-	-0.321843	-2.57605	-1.4628	0.14387435447495636	0.29104221826921894	-4.95406	ENSG00000173064	HECTD4	GBA_Control_v_Control	-0.141149	-3.31212	-0.253881	0.7996473981159415	0.9821086447545352	-5.56225
2:61278164-61281242:-	-0.326637	-2.04429	-1.47911	0.1394631959700307	0.2862575868382415	-4.95646	ENSG00000115464	USP34	GBA_Control_v_Control	1.3364898864354782	2.064620782259371	2.236111277244535	0.0255959	0.5968821118127768	-3.423
17:39684596-39686019:-	0.3084888708473166	-2.10328	1.4679823579629987	0.14246023188545928	0.28992815677052863	-4.95711	ENSG00000161395	PGAP3	GBA_Control_v_Control	0.17074075775785058	-0.116402	0.632037	0.5275278965517978	0.9210556552849787	-5.33026
2:226864603-226867318:+	-0.204436	1.633469341326436	-1.67372	0.0945351	0.2216821962767643	-4.95952	ENSG00000144468	RHBDD1	GBA_Control_v_Control	0.7080786847344984	1.5811866426107835	1.4304980247303773	0.15293117058118952	0.786634	-4.67529
5:36953617-36962274:+	0.29108503233486127	-3.09483	1.4344885171228063	0.1517820938707184	0.3023038382075162	-4.9614	ENSG00000164190	NIPBL	GBA_Control_v_Control	1.4092660379363604	-1.39871	2.1119363324669065	0.0349748	0.6278743191681722	-3.64362
1:32948221-32949774:-	-0.375116	-2.3553	-1.45458	0.14613677123442276	0.29490821983485077	-4.96531	ENSG00000116514	RNF19B	GBA_Control_v_Control	0.0732882	2.5429272079953784	0.1489704720338583	0.8816112625516491	0.9826798758222193	-5.53713
3:169976945-169988359:+	-0.298612	-1.19011	-1.52512	0.12758194111011156	0.26944664040739286	-4.96638	ENSG00000008952	SEC62	GBA_Control_v_Control	-0.0436405	-0.610997	-0.0582761	0.9535420358207258	0.9951955291565148	-5.49678
14:39179090-39179462:+	-0.357868	-2.17832	-1.46601	0.14299533180587662	0.2903133761814593	-4.96677	ENSG00000100941	PNN	GBA_Control_v_Control	-0.17822	3.2072693968126815	-0.425613	0.6704946128898923	0.9579118935070294	-5.48076
7:30550635-30562128:-	-0.23092	-1.55902	-1.49829	0.1344100179766239	0.2799930771498158	-4.96701	ENSG00000281039,ENSG00000196295	AC005154.5,GARS1-DT	GBA_Control_v_Control	0.30729470119034996	2.4717337323183632	1.2089119739809053	0.2270231071728349	0.8139491723943062	-4.92695
20:49151581-49174269:-	0.2887683995096766	-3.18675	1.4270427915765298	0.15391621137114353	0.3051066338750295	-4.96808	ENSG00000124214	STAU1	GBA_Control_v_Control	0.0050425	-2.20273	0.00825686	0.9934139384281926	0.9990718280437094	-5.52449
16:88027482-88038011:+	-0.165877	0.9055019686409073	-1.62795	0.10388750649071272	0.23459713861029233	-4.96853	ENSG00000172530	BANP	GBA_Control_v_Control	0.1417645909825131	1.5996567462718452	0.5540995859547732	0.5796522159742565	0.937919	-5.4014
5:139614585-139614966:+	-0.395266	-2.21961	-1.45336	0.1464759336795161	0.29523780630000906	-4.97028	ENSG00000131508	UBE2D2	GBA_Control_v_Control	-0.23965	-2.37218	-0.347966	0.7279497062885203	0.9673821440412214	-5.47479
10:46010222-46011206:-	-0.280688	-0.103131	-1.59206	0.11172320689983778	0.24747132504594674	-4.97098	ENSG00000266412	NCOA4	GBA_Control_v_Control	-0.109698	5.958621539398151	-0.283993	0.776483	0.9821086447545352	-5.55176
10:68430435-68430660:-	-0.339042	-3.16105	-1.42282	0.1551356147883699	0.30643846732902713	-4.97325	ENSG00000138346	DNA2	GBA_Control_v_Control	-0.0899832	-2.15796	-0.253656	0.7998212272648787	0.9821086447545352	-5.49937
5:79618646-79620083:+	-0.289071	-1.03733	-1.52052	0.128734	0.27119686593752473	-4.975	ENSG00000164329	TENT2	GBA_Control_v_Control	0.243089	2.6734832357437703	0.6622001335104359	0.5080173539415994	0.9184537997368243	-5.36409
1:17341942-17342402:+	0.3081153737536457	-1.96605	1.4549401295171378	0.14603634271923677	0.29490821983485077	-4.97546	ENSG00000159339	PADI4	GBA_Control_v_Control	0.5433024937418356	2.4001797595554564	1.5548124460844153	0.12035238304001408	0.7357016639037067	-4.5137
8:41661429-41661941:-	-0.251706	-0.345133	-1.57686	0.1151807836859144	0.25148054071345943	-4.9793	ENSG00000029534	ANK1	GBA_Control_v_Control	-0.479736	-1.42693	-1.29204	0.1966850487801768	0.8007786065832116	-4.79688
17:1361091-1362008:-	-0.323052	-2.13567	-1.44845	0.1478403765483181	0.29727424218518095	-4.97949	ENSG00000108953	YWHAE	GBA_Control_v_Control	-0.306546	2.3086670682999553	-0.769023	0.4420871464491628	0.8938490480862389	-5.28385
14:49607399-49608121:+	-0.373807	-1.7955	-1.47936	0.13939820384984647	0.2862575868382415	-4.98	ENSG00000165501	LRR1	GBA_Control_v_Control	-0.537432	0.5239522490788312	-1.55792	0.11961403788867883	0.7357016639037067	-4.4849
9:271626-289581:+	-0.323703	-2.94428	-1.41983	0.15600472534276433	0.30779310675734584	-4.98063	ENSG00000107099	DOCK8	GBA_Control_v_Control	0.2356748901986192	3.273858774421801	0.3160777180038485	0.7520189077546012	0.97851	-5.50469
17:30876373-30879487:+	-0.319204	-3.12269	-1.41825	0.15646497418411393	0.30785924796813446	-4.98235	ENSG00000176208	ATAD5	GBA_Control_v_Control	0.2059582818646124	-1.79492	0.5005233997825727	0.6168324643150882	0.937919	-5.40941
12:128808787-128815070:-	-0.334436	-2.64088	-1.42791	0.15366552408081283	0.3049697576024642	-4.98373	ENSG00000279500,ENSG00000139370	AC108704.2,SLC15A4	GBA_Control_v_Control	-0.0345298	2.2937251351428074	-0.0637443	0.949188	0.9951955291565148	-5.54115
2:99449335-99464985:-	-0.281704	-2.25403	-1.44901	0.14768490081907898	0.29727424218518095	-4.98653	ENSG00000135945	REV1	GBA_Control_v_Control	0.6422990264318642	-0.61559	0.992506	0.3212253227272844	0.8559777364617792	-5.09328
2:200856681-200856985:-	-0.386404	-2.48803	-1.43019	0.15301142710629703	0.3043912157718871	-4.98971	ENSG00000013441	CLK1	GBA_Control_v_Control	0.8282183323389223	2.639048853888268	1.237563213494816	0.21621008430253094	0.8059861096765057	-4.8866
10:96907264-96952196:+	0.27588836403251205	-2.81811	1.41789	0.15657054105251478	0.30785924796813446	-4.9916	ENSG00000196233	LCOR	GBA_Control_v_Control	0.8399518303135896	-2.35069	1.2668197919551365	0.20555686306750034	0.8059861096765057	-4.8446
4:1225359-1241519:-	-0.231705	-0.226546	-1.55647	0.11995018009406935	0.258532	-4.99169	ENSG00000159692	CTBP1	GBA_Control_v_Control	-0.153245	3.3759365722265042	-0.478621	0.6323277611964999	0.9428759423169835	-5.47489
7:7234302-7243750:+	-0.269058	-2.07592	-1.44597	0.1485361623740803	0.2983160485957904	-4.9946	ENSG00000106392	C1GALT1	GBA_Control_v_Control	0.1413132721149779	2.244671882981059	0.3056360053654567	0.7599545069382786	0.9815104747302844	-5.49288
16:18797924-18798834:-	0.5255173091486841	-1.26789	1.5084229525480208	0.1318083394468144	0.27628739317253603	-4.99876	ENSG00000260342,ENSG00000170540	AC138811.2,ARL6IP1	GBA_Control_v_Control	0.7474612297300798	4.951531680088342	1.3407083984772679	0.1803631430563382	0.7994054950997603	-4.81165
8:130214555-130358143:-	-0.228209	-0.804412	-1.53378	0.12543638424833528	0.26692989753226226	-4.99935	ENSG00000153317	ASAP1	GBA_Control_v_Control	0.33215909620040396	-4.50017	0.7147563296353007	0.47495636103801286	0.8996202637244488	-5.39544
2:197418895-197420231:-	-0.372157	-3.21727	-1.40057	0.16168987286424913	0.31493885909405367	-4.9996	ENSG00000115524	SF3B1	GBA_Control_v_Control	-0.936552	2.1888370204005057	-1.06147	0.2887676654116445	0.8463996107562392	-5.05744
2:127763061-127771004:-	-0.307111	-3.02847	-1.40216	0.1612135433422926	0.31437577151185747	-5.0073	ENSG00000136709	WDR33	GBA_Control_v_Control	-0.101832	1.7129514448173087	-0.15787	0.8745955698170225	0.9826798758222193	-5.51326
1:88770351-88771879:+	-0.355484	-2.66111	-1.41406	0.15769256193881923	0.3085848618826078	-5.00943	ENSG00000065243	PKN2	GBA_Control_v_Control	1.5543451273648161	-2.15181	2.342630487626326	0.0193716	0.5181226712443692	-3.21361
1:95143890-95151419:+	-0.209534	4.2911415099194885	-1.75943	0.0788453	0.20272784665105367	-5.00986	ENSG00000271092,ENSG00000152078	TLCD4-RWDD3,TLCD4	GBA_Control_v_Control	-0.0803927	2.567107170605972	-0.199699	0.8417627003591859	0.9821086447545352	-5.54045
15:65737706-65738875:-	-0.264314	-2.18798	-1.42636	0.15411398755339048	0.3051384258279984	-5.02084	ENSG00000174485	DENND4A	GBA_Control_v_Control	0.682934	1.4278609447635338	0.902888	0.36683373196181124	0.8801117196442911	-5.18681
11:68759568-68761687:-	-0.30799	-3.23241	-1.38316	0.16695957722571564	0.32229775217778056	-5.02259	ENSG00000110090	CPT1A	GBA_Control_v_Control	0.0404182	-0.0611869	0.0773158	0.9383899889187904	0.9915398309595024	-5.49501
1:154251040-154251653:+	-0.401432	-2.92085	-1.39326	0.16388941941492924	0.31848418425655806	-5.02412	ENSG00000143569	UBAP2L	GBA_Control_v_Control	-0.940785	-0.118046	-1.85958	0.063280498984602293	0.648659	-4.05343
3:100283606-100290701:+	-0.308263	-3.03572	-1.38418	0.16664765645180468	0.32229775217778056	-5.02889	ENSG00000036054	TBC1D23	GBA_Control_v_Control	-1.19472	0.0844445	-1.93333	0.053517374805151396	0.648659	-3.94048
2:44502688-44505730:+	-0.228275	-1.32782	-1.46433	0.14345557428316566	0.2908960256297526	-5.03417	ENSG00000143919	CAMKMT	GBA_Control_v_Control	1.017510816344474	-1.61055	2.9944844877984917	0.0028265	0.3283825104480537	-1.76724
3:142425221-142426841:-	-0.427384	-2.7041	-1.38587	0.16613503161334453	0.3221024458184821	-5.03763	ENSG00000114127	XRN1	GBA_Control_v_Control	0.0949205	1.572085931110113	0.1423571239329846	0.8868307029589171	0.9837948889599599	-5.51342
6:35312213-35312772:+	-0.291407	-1.851	-1.41695	0.15684420374219787	0.30785924796813446	-5.04208	ENSG00000023892	DEF6	GBA_Control_v_Control	-0.397397	0.6281870077627641	-1.52804	0.1268644944250788	0.7473876706656397	-4.52542
20:35729311-35732135:-	-0.386053	-2.99258	-1.3721	0.17037667313718247	0.32618293523070624	-5.04439	ENSG00000131051	RBM39	GBA_Control_v_Control	-0.215179	2.505746407240946	-0.276689	0.7820846092604464	0.9821086447545352	-5.50303
3:123223558-123259589:+	-0.282845	-2.6296	-1.37876	0.16831320366680566	0.32378233427209324	-5.04892	ENSG00000065485,ENSG00000121542	PDIA5,SEC22A	GBA_Control_v_Control	-0.00744853	0.6530395060238784	-0.0168974	0.9865223273981052	0.9972131172193971	-5.49986
7:98965695-98971945:+	-0.323122	-3.00943	-1.36456	0.17273544640945473	0.32970489888171645	-5.05348	ENSG00000196367	TRRAP	GBA_Control_v_Control	-0.681799	0.00530299	-1.42642	0.15410300330844923	0.786634	-4.64655
19:23358429-23362725:-	-0.261765	-0.26718	-1.52128	0.12854247192909302	0.27113418388058685	-5.05475	ENSG00000167232	ZNF91	GBA_Control_v_Control	-0.0385156	1.805108516484508	-0.17951	0.8575790640635006	0.9821086447545352	-5.51468
5:72989426-72990864:+	-0.357332	-2.01683	-1.40528	0.1602858920266469	0.3129302473403955	-5.05596	ENSG00000157107	FCHO2	GBA_Control_v_Control	0.24854939150765265	1.91541	0.6204510239050333	0.5351224676597749	0.9210556552849787	-5.3653
3:63912587-63913225:+	-0.284035	-0.535672	-1.49398	0.13553249563367512	0.28198148719819144	-5.05883	ENSG00000163635	ATXN7	GBA_Control_v_Control	0.31366090334591695	3.0041546888372985	1.3432965268514938	0.1795241258560656	0.7994054950997603	-4.79382
11:16183885-16234671:-	-0.306954	-1.9296	-1.41658	0.1569550424423604	0.30785924796813446	-5.05991	ENSG00000110693	SOX6	GBA_Control_v_Control	-0.156695	-4.18574	-0.410562	0.6814942704528493	0.9579118935070294	-5.55326
5:180549930-180553471:+	-0.32926	-2.35468	-1.38138	0.1675079329465151	0.32289990748243264	-5.06118	ENSG00000113300	CNOT6	GBA_Control_v_Control	0.13685169770142913	-0.586008	0.27960348420564063	0.779848	0.9821086447545352	-5.46159
22:21805849-21807846:-	-0.294092	-0.566689	-1.48772	0.13717564365705587	0.2836427410100946	-5.06155	ENSG00000100030	MAPK1	GBA_Control_v_Control	0.7319540222918883	4.370387177645019	1.5571759599946233	0.11979	0.7357016639037067	-4.53587
19:54909244-54910065:+	-0.277755	-2.32618	-1.37637	0.16905205339039883	0.32438674016283386	-5.06304	ENSG00000189430	NCR1	GBA_Control_v_Control	0.0787694	-0.488085	0.1968567535381163	0.8439853567198345	0.9821086447545352	-5.47546
12:1702885-1754514:+	-0.274686	-1.59596	-1.42906	0.15333662094787484	0.3046771438715762	-5.06527	ENSG00000006831	ADIPOR2	GBA_Control_v_Control	0.26477124101336047	-1.51863	0.6264505070612812	0.5311829001174359	0.9210556552849787	-5.33755
19:40583397-40583717:+	-0.220433	-0.248574	-1.49304	0.13578022860120512	0.2821472819572072	-5.06644	ENSG00000160410	SHKBP1	GBA_Control_v_Control	0.15683663412275006	3.4214626944839304	0.884415	0.3767149826092926	0.8823077098619806	-5.24232
2:181458195-181485992:+	-0.268685	-2.3383	-1.37801	0.16854422879917183	0.32378233427209324	-5.06693	ENSG00000115232	ITGA4	GBA_Control_v_Control	0.10796033562906837	-2.96505	0.14548798701186363	0.8843591105417905	0.983337	-5.55645
10:3158913-3160330:-	-0.308608	-2.50892	-1.36433	0.17280542645378824	0.32970489888171645	-5.07452	ENSG00000107959	PITRM1	GBA_Control_v_Control	-0.36433	0.8571584561790137	-0.966061	0.3342806545490603	0.8605768339808534	-5.11307
10:26500818-26513660:+	-0.254884	-2.32355	-1.3729	0.17012677025178485	0.3260763096492543	-5.07473	ENSG00000077420,ENSG00000199733	APBB1IP,RNA5SP307	GBA_Control_v_Control	0.3129530414028192	3.0065120220370116	0.5127654535523661	0.6082448310264347	0.937919	-5.44417
16:58559803-58560362:-	-0.482041	-2.17823	-1.37843	0.16842411318238412	0.32378233427209324	-5.0806	ENSG00000206952,ENSG00000281910,ENSG00000125107	SNORA50A,SNORA50A,CNOT1	GBA_Control_v_Control	-0.715046	0.17615573474144167	-1.59953	0.11006407241227391	0.730176	-4.42859
13:28197184-28220378:+	-0.294927	-3.13611	-1.33468	0.1823192423430265	0.3412642228472034	-5.08281	ENSG00000152520,ENSG00000232587	PAN3,EEF1A1P3	GBA_Control_v_Control	0.39046625042433014	-3.67254	0.6670522785392082	0.5049146232358678	0.9174801433041364	-5.38909
21:36362182-36372531:+	-0.297792	-3.07273	-1.34153	0.18008975786654458	0.33936105887534046	-5.08517	ENSG00000159256	MORC3	GBA_Control_v_Control	-0.0108562	1.1083515625727953	-0.0176709	0.9859054430660343	0.9972131172193971	-5.51307
11:3768580-3776021:-	-0.219824	-1.20125	-1.44492	0.14883012788905595	0.29854932464244316	-5.08818	ENSG00000110713	NUP98	GBA_Control_v_Control	-0.0255353	-4.91509	-0.0580185	0.9537512943721707	0.9951955291565148	-5.65116
10:96544075-96565426:-	-0.285621	-2.25803	-1.36337	0.17311018805536507	0.3299114707661271	-5.08846	ENSG00000077147	TM9SF3	GBA_Control_v_Control	-0.599455	2.2792262881988967	-0.951354	0.3416871865847507	0.8605768339808534	-5.15013
4:128074459-128082305:+	-0.335857	-3.0426	-1.33594	0.18190688078518735	0.3408723803999214	-5.09429	ENSG00000138709	LARP1B	GBA_Control_v_Control	0.9618477453556769	-1.50656	1.9094902838280527	0.0565257	0.648659	-3.97684
18:46890579-46903635:-	-0.186786	-0.535797	-1.47936	0.13939478960075546	0.2862575868382415	-5.09486	ENSG00000078043	PIAS2	GBA_Control_v_Control	-0.146204	1.3644188340190064	-0.991567	0.32168273774673595	0.8559777364617792	-5.10289
2:201008972-201011472:-	-0.284331	-3.19412	-1.31721	0.18810413247968907	0.3493659717183606	-5.10188	ENSG00000155744	FAM126B	GBA_Control_v_Control	-0.710111	1.5045513422176098	-0.985568	0.3246176449098095	0.8587242186068984	-5.11044
1:172551511-172557794:+	-0.284901	0.15202129220887406	-1.50534	0.13259049346656407	0.2775803472947146	-5.10493	ENSG00000094975	SUCO	GBA_Control_v_Control	0.4309354182161902	2.3981125760083772	1.2001692531452015	0.23039848437042218	0.8213143423735432	-4.93751
2:177231888-177234271:-	-0.30152	-1.05106	-1.43499	0.1516387721330529	0.3023038382075162	-5.10528	ENSG00000116044	NFE2L2	GBA_Control_v_Control	-0.0313812	1.9017378903516409	-0.0622679	0.9503637339813218	0.9951955291565148	-5.53318
1:25448807-25456831:+	-0.296397	-3.17957	-1.31614	0.1884639200334409	0.3496474273327594	-5.10679	ENSG00000204178	MACO1	GBA_Control_v_Control	0.3925951994432433	-3.01788	0.7418329311870359	0.4583876547482473	0.8992031284658809	-5.31921
2:131071854-131082657:-	-0.29084	-3.06346	-1.31382	0.1892423813159168	0.35070414815609746	-5.10805	ENSG00000152102	FAM168B	GBA_Control_v_Control	-0.0831034	0.4340575779185964	-0.173871	0.8620073213843235	0.9821086447545352	-5.49269
6:34606554-34606904:-	-0.285573	-2.98377	-1.319	0.18750566698531446	0.3490266240225532	-5.10834	ENSG00000196821	ILRUN	GBA_Control_v_Control	-0.11612	0.9436087630825207	-0.242484	0.8084623422074685	0.9821086447545352	-5.4889
2:71396140-71418639:+	-0.304194	-1.34676	-1.41538	0.15730612074427155	0.30818783749081907	-5.10889	ENSG00000075292	ZNF638	GBA_Control_v_Control	0.8274090811343984	1.9980601443578214	1.9448806663015703	0.0521094	0.648659	-3.93728
5:83537006-83542268:+	0.30777870362681403	-2.54399	1.3377656000228855	0.18131256173423185	0.34051878204896563	-5.10908	ENSG00000038427	VCAN	GBA_Control_v_Control	0.7573768234332587	3.845531582167942	1.227613842863623	0.219922	0.8059861096765057	-4.9303
12:120782654-120810886:-	-0.219106	-1.4836	-1.39734	0.1626578263365856	0.31645711520176967	-5.11228	ENSG00000157837	SPPL3	GBA_Control_v_Control	-0.0524909	-0.866213	-0.247588	0.8045109715156764	0.9821086447545352	-5.46536
15:92953356-92956649:+	-0.218749	-1.87988	-1.3676	0.17178167503403136	0.32849821455824446	-5.1126	ENSG00000173575	CHD2	GBA_Control_v_Control	1.5882129213464964	1.429824809253855	2.249105858518431	0.0247538	0.5853744697843276	-3.39672
3:148586121-148592265:-	-0.359613	-2.21776	-1.34582	0.17870136130723233	0.3375023460459427	-5.11375	ENSG00000285557	AC069410.1	GBA_Control_v_Control	0.13701247695597818	-4.66506	0.5001697913915325	0.617081	0.937919	-5.54968
13:112516439-112527484:-	-0.27937	-2.57413	-1.32803	0.1845056978800649	0.3445885058293982	-5.12023	ENSG00000126216	TUBGCP3	GBA_Control_v_Control	-0.48069	0.11459381585102643	-0.968989	0.3328186428036052	0.8605768339808534	-5.10489
1:247155565-247159813:-	-0.380783	-1.63429	-1.38303	0.16700359999682496	0.32229775217778056	-5.12138	ENSG00000196418	ZNF124	GBA_Control_v_Control	-0.297983	0.254818	-0.718756	0.4724828757574586	0.8996202637244488	-5.2828
1:167966628-167975015:+	-0.323356	-2.04135	-1.34983	0.1774118112939859	0.33627580718925437	-5.12204	ENSG00000143164	DCAF6	GBA_Control_v_Control	-0.18851	0.8127207535889269	-0.485102	0.6277254850802121	0.9405053413475982	-5.41128
1:95138274-95173889:+	-0.247544	0.3458401079487884	-1.49907	0.13420824197989803	0.2799930771498158	-5.1289	ENSG00000231992,ENSG00000271092,ENSG00000152078	AC092802.3,TLCD4-RWDD3,TLCD4	GBA_Control_v_Control	0.20664792298519696	-4.59558	0.6809533615838623	0.4960942072722768	0.9093255174783328	-5.43754
10:15833629-15847943:-	-0.270411	-2.0295	-1.34971	0.1774510811016554	0.33627580718925437	-5.12962	ENSG00000148481	MINDY3	GBA_Control_v_Control	-0.142503	2.1236789365488398	-0.509512	0.6105216392924573	0.937919	-5.42309
14:22909482-22911403:-	-0.249829	0.4076756409214503	-1.50235	0.1333602225349736	0.27884410166403567	-5.13173	ENSG00000100461	RBM23	GBA_Control_v_Control	0.5443197757660432	0.5701198235588187	0.738792	0.4602314088572398	0.8992031284658809	-5.27645
3:142093060-142101841:-	-0.319343	-3.05618	-1.30213	0.19320836354909648	0.35530869923212816	-5.1318	ENSG00000114126	TFDP2	GBA_Control_v_Control	0.6635548653645857	-0.615863	1.1782408013779708	0.23902098576306705	0.8307451706813072	-4.91781
1:207717463-207724708:+	-0.317635	-2.63137	-1.3125	0.18968805822200818	0.3511425024859446	-5.13265	ENSG00000197721	CR1L	GBA_Control_v_Control	0.0884454	-1.04977	0.18337344199562874	0.8545474995268633	0.9821086447545352	-5.47902
18:36026899-36033837:-	-0.305882	-3.00419	-1.30052	0.19375799053146606	0.35592961280342617	-5.13525	ENSG00000141425	RPRD1A	GBA_Control_v_Control	-0.343331	1.2949997997288805	-0.550458	0.5821460640745433	0.937919	-5.38673
8:41704040-41714254:-	0.2799329774631958	-2.0911	1.3482639583870417	0.1779144884709505	0.33639462403460124	-5.13534	ENSG00000029534	ANK1	GBA_Control_v_Control	0.31295395957745953	-0.726449	0.8025420180027152	0.422457	0.8888546826182961	-5.22168
5:179709872-179720560:+	-0.237987	-2.20665	-1.33696	0.18157543690700653	0.3406314620858815	-5.13574	ENSG00000127022	CANX	GBA_Control_v_Control	0.48700223760886185	2.9298084358535177	0.8127599819739765	0.41657678553007627	0.8842382084766094	-5.27575
19:38343579-38344368:+	-0.244207	-3.09382	-1.29131	0.19693063798210142	0.3593984143173351	-5.13656	ENSG00000099338	CATSPERG	GBA_Control_v_Control	-0.376373	-0.737634	-1.22441	0.22112683899548852	0.8059861096765057	-4.8795
19:8553138-8553437:-	-0.256964	-2.34015	-1.30863	0.19099460055504738	0.3531717338457319	-5.14442	ENSG00000142347	MYO1F	GBA_Control_v_Control	0.541089	0.3841498498506891	0.6191757411393591	0.5359617812594282	0.9210556552849787	-5.36955
11:116863667-116873636:-	-0.232018	-2.08715	-1.33275	0.18295206129859534	0.34206738409837595	-5.14633	ENSG00000160584	SIK3	GBA_Control_v_Control	-0.291539	1.6545624847588136	-1.14353	0.25313101684890726	0.842534	-4.9717
2:23823257-23823569:-	-0.205725	-0.783743	-1.41661	0.15694427029273625	0.30785924796813446	-5.14662	ENSG00000119778	ATAD2B	GBA_Control_v_Control	-0.497772	-2.81908	-0.795876	0.4263202117021969	0.8902881037910305	-5.268
1:207677388-207683957:+	-0.305102	-2.78828	-1.29495	0.19567038478110577	0.35827114026251716	-5.1473	ENSG00000197721	CR1L	GBA_Control_v_Control	-0.168482	-2.97097	-0.353807	0.723569	0.9670804091739919	-5.53571
12:894561-897681:+	0.3112131560720135	-1.45353	1.3902633006993272	0.1647946938237698	0.3198731687053289	-5.15096	ENSG00000060237	WNK1	GBA_Control_v_Control	0.6478747248792165	1.4500354126918058	1.6108222737105873	0.10757915263615447	0.730176	-4.43509
1:10095460-10105744:+	-0.255137	-3.01685	-1.28489	0.19916315833294815	0.361118	-5.15291	ENSG00000130939	UBE4B	GBA_Control_v_Control	0.33870015913290974	0.5593454880302839	0.7571284035282895	0.44917678690828633	0.8978188395464437	-5.26452
6:158583953-158589782:+	-0.308274	-3.18371	-1.27408	0.2029669425507766	0.3644721888157796	-5.1558	ENSG00000146433	TMEM181	GBA_Control_v_Control	-0.180849	0.0091631	-0.349953	0.7264585389910441	0.967296	-5.46272
7:17890362-17897446:-	-0.263796	-1.89858	-1.33783	0.18129299277675767	0.34051878204896563	-5.15794	ENSG00000071189	SNX13	GBA_Control_v_Control	0.042930058196629206	3.333079987382917	0.0979144	0.9220227213622069	0.9893844099482694	-5.56741
2:201344169-201351451:-	0.26277505100058285	-1.49944	1.3835858674486883	0.16683015981162713	0.32229775217778056	-5.15838	ENSG00000155749	FLACC1	GBA_Control_v_Control	0.30096863767410964	-4.14815	0.726002	0.4680342888226531	0.8996202637244488	-5.42468
11:85996825-86007583:-	-0.268121	-2.8029	-1.28621	0.1987021616913949	0.36067127511335356	-5.15878	ENSG00000073921	PICALM	GBA_Control_v_Control	0.984878	-3.19484	1.850863713654537	0.064526	0.648659	-4.10606
3:33684358-33696933:-	-0.322139	-2.99114	-1.27925	0.20113894179353325	0.36289953468456204	-5.15959	ENSG00000163539	CLASP2	GBA_Control_v_Control	0.4124896493392247	1.60927	0.7313234166050552	0.4647774498906495	0.8992031284658809	-5.2955
9:111786792-111787947:+	-0.431158	-2.67372	-1.28864	0.19786198633775728	0.36013693620700027	-5.15983	ENSG00000165181	SHOC1	GBA_Control_v_Control	0.022752	-0.916296	0.048005863958320634	0.9617225252024206	0.9951955291565148	-5.50552
20:38057531-38066256:+	-0.320896	-3.08753	-1.27682	0.2019981750329393	0.36312091636006966	-5.15988	ENSG00000101413	RPRD1B	GBA_Control_v_Control	0.39457816598263856	-0.457571	0.7699055733484962	0.44156372861194737	0.8938490480862389	-5.24725
2:119926597-119945240:+	-0.292404	-2.66393	-1.28829	0.19797879220908948	0.36013693620700027	-5.17033	ENSG00000088179	PTPN4	GBA_Control_v_Control	1.0361265130334263	1.3713368651671611	1.8061896927805354	0.0712323	0.6499943019518681	-4.14697
8:143688661-143690123:+	-0.224952	-1.51187	-1.34381	0.17935080332752062	0.3383483132437159	-5.17132	ENSG00000181135	ZNF707	GBA_Control_v_Control	0.16226364451661146	-0.358604	0.49058716634386945	0.6238414581493447	0.937919	-5.39236
16:2253303-2254063:-	-0.348337	-3.25376	-1.26171	0.2073824735911866	0.3688508190250025	-5.17199	ENSG00000205937	RNPS1	GBA_Control_v_Control	-0.435376	-1.01762	-0.83158	0.405873	0.8827087649054147	-5.22524
2:54050957-54057360:+	-0.278526	-2.27439	-1.29495	0.19567280263295309	0.35827114026251716	-5.17384	ENSG00000233266,ENSG00000170634	HMGB1P31,ACYP2	GBA_Control_v_Control	0.41913838959358385	-0.530029	1.2409052134255465	0.21497334975909768	0.8059861096765057	-4.85006
4:82878729-82881940:-	-0.295571	-2.63446	-1.27979	0.2009492426100902	0.36289953468456204	-5.17543	ENSG00000138674	SEC31A	GBA_Control_v_Control	0.6656169128294582	-3.70402	1.3087734027947435	0.1909547852898775	0.8007786065832116	-4.83171
12:121780871-121781192:-	-0.228998	-1.24019	-1.35052	0.17719104268186592	0.33627580718925437	-5.17581	ENSG00000139725	RHOF	GBA_Control_v_Control	0.11577189184833239	1.6882925126592616	0.7093394366722318	0.47830275102993425	0.8996202637244488	-5.31585
1:212863724-212885396:+	-0.213781	-1.63414	-1.34042	0.1804473841939664	0.3396537646431273	-5.17804	ENSG00000162769	FLVCR1	GBA_Control_v_Control	-0.225425	0.9553432255565464	-0.863059	0.388342	0.8823077098619806	-5.19343
7:92294888-92307656:+	-0.281186	-2.99995	-1.26403	0.20654830545085354	0.36775673897347094	-5.17929	ENSG00000001629	ANKIB1	GBA_Control_v_Control	0.010900478012614734	0.2882705680157319	0.0211574	0.9831248875661742	0.9971506702600866	-5.49755
1:100494817-100499262:+	-0.254625	-3.09723	-1.25499	0.20980850066829748	0.37198360361359184	-5.1838	ENSG00000079335	CDC14A	GBA_Control_v_Control	-0.28628	0.972389	-0.600296	0.548464	0.9227168143859403	-5.36285
7:99388038-99390012:+	-0.247269	-2.56868	-1.26501	0.20619547818751358	0.36751826738517546	-5.18844	ENSG00000130429,ENSG00000284292	ARPC1B,AC004922.1	GBA_Control_v_Control	-0.373998	4.6225229467417925	-0.53892	0.5900789067193128	0.937919	-5.44383
9:33948373-33948587:-	-0.234724	-1.7455	-1.30785	0.19126101782437419	0.35327530134997165	-5.1919	ENSG00000137073	UBAP2	GBA_Control_v_Control	0.2715843162528806	-5.35669	1.2600703742414125	0.20827689853260975	0.8059861096765057	-5.00288
6:7176654-7189322:+	-0.227655	-2.22894	-1.28272	0.199921	0.3621004946411648	-5.19223	ENSG00000225092,ENSG00000124782	AL355336.1,RREB1	GBA_Control_v_Control	-0.280415	1.1861746556056292	-0.821022	0.4118574475229695	0.8827087649054147	-5.2296
2:84870224-84870785:-	-0.245861	-1.8806	-1.30449	0.1924001152134206	0.35498878400366285	-5.19255	ENSG00000186854	TRABD2A	GBA_Control_v_Control	-0.29765	2.649217078918838	-0.937187	0.3489211864107926	0.8638512846383748	-5.17692
10:21681331-21682257:+	-0.259222	-3.09469	-1.24252	0.21437002039329323	0.3781815995544823	-5.19391	ENSG00000078403	MLLT10	GBA_Control_v_Control	0.563216	-0.670557	1.1153588764996325	0.2650029268656136	0.84418	-4.98801
10:43154896-43176032:+	-0.26553	-2.39289	-1.26905	0.20475211875638052	0.36622139384717683	-5.19474	ENSG00000169826	CSGALNACT2	GBA_Control_v_Control	0.38891563780898686	-0.603858	0.6216008667561915	0.5343662804732214	0.9210556552849787	-5.34649
16:68801669-68815759:+	0.28107573562178256	-2.63722	1.2719794745843058	0.20371069749683302	0.3654169456166481	-5.19752	ENSG00000039068	CDH1	GBA_Control_v_Control	0.3325830918312441	-4.94976	1.3319412131993789	0.18323436878965998	0.8007786065832116	-4.88953
5:173944966-173953272:+	-0.254799	-2.49739	-1.27116	0.20400268330689303	0.3655501657121381	-5.19792	ENSG00000113742	CPEB4	GBA_Control_v_Control	0.10713605806253312	1.2946265521099283	0.21965583519743007	0.8261904401451123	0.9821086447545352	-5.49416
14:30715923-30734858:+	-0.281234	-2.37917	-1.26888	0.20481351329511557	0.36622139384717683	-5.19898	ENSG00000092108	SCFD1	GBA_Control_v_Control	0.0996895	0.3787893877318667	0.207662	0.8355408946765829	0.9821086447545352	-5.48186
1:172555868-172570730:+	-0.260965	-2.15842	-1.27699	0.2019351112037293	0.36312091636006966	-5.21062	ENSG00000094975	SUCO	GBA_Control_v_Control	0.5793800380341535	-2.11173	0.9175624313826751	0.35910085884380016	0.8725475282181483	-5.19239
17:47154671-47158303:-	-0.209941	-1.24344	-1.34883	0.1777311050591596	0.33639462403460124	-5.21256	ENSG00000004897	CDC27	GBA_Control_v_Control	0.43098746508532915	-2.6854	0.8347161848631518	0.40410538807216945	0.8827087649054147	-5.23369
7:127385525-127386155:-	-0.253256	-1.97361	-1.28107	0.2004992908008546	0.3627567987657703	-5.21873	ENSG00000048405	ZNF800	GBA_Control_v_Control	0.0860386	1.7283242372529595	0.2934000175724415	0.7692859688566418	0.9821086447545352	-5.4924
2:64572945-64585545:+	-0.286239	-3.05596	-1.22701	0.2201428757302355	0.3862276785277591	-5.21991	ENSG00000252414,ENSG00000119844	RNU6-100P,AFTPH	GBA_Control_v_Control	0.23673610316476146	1.5479089652318778	0.41610873017679745	0.6774324909018397	0.9579118935070294	-5.4526
19:3660965-3662001:-	-0.222568	-0.91709	-1.35693	0.1751458420948131	0.33341254974738227	-5.22249	ENSG00000186111	PIP5K1C	GBA_Control_v_Control	0.24997811635307388	-0.80539	0.6264182144263472	0.5312040656038757	0.9210556552849787	-5.32703
19:50398847-50399484:+	-0.252052	-2.46216	-1.24054	0.21509891622629923	0.37896230886039495	-5.22583	ENSG00000062822	POLD1	GBA_Control_v_Control	-0.569023	-0.458588	-1.59249	0.11163482673645468	0.730176	-4.45146
3:169975607-169988359:+	-0.27397	-2.92429	-1.2227	0.2217646262481725	0.3878570911152934	-5.22945	ENSG00000008952	SEC62	GBA_Control_v_Control	0.9531231654781465	1.3756436939860859	1.3394199911057791	0.18078181768239046	0.7994054950997603	-4.76308
8:8922288-8922750:+	-0.264666	-1.32283	-1.31824	0.18776114596985366	0.34911513187528714	-5.23346	NA	NA	GBA_Control_v_Control	-0.256144	0.14933117084780034	-1.26205	0.2072682254407531	0.8059861096765057	-4.82958
13:50927406-50949505:+	-0.303509	-1.30745	-1.32093	0.18686205488965388	0.34860154462192094	-5.23488	ENSG00000136104	RNASEH2B	GBA_Control_v_Control	-0.174398	2.86927	-0.565876	0.5716231785846556	0.937919	-5.42013
7:6814763-6823360:-	-0.368136	-2.05759	-1.24342	0.214041	0.3781815995544823	-5.23836	ENSG00000146574	CCZ1B	GBA_Control_v_Control	0.0218574	0.5613015513506021	0.044926068486284644	0.9641764898033889	0.9956041367649998	-5.50455
13:30251930-30255615:-	-0.291175	-2.67415	-1.21752	0.22372891871304723	0.38966893622324306	-5.23918	ENSG00000102781	KATNAL1	GBA_Control_v_Control	0.26317975268644567	-0.917448	0.7116266042835151	0.4768857223184243	0.8996202637244488	-5.28625
11:34090178-34092056:+	-0.239823	-1.48738	-1.29382	0.19606280925082817	0.35859417944677613	-5.2446	ENSG00000135387	CAPRIN1	GBA_Control_v_Control	0.724842	-4.11186	1.3231921073897062	0.1861403738337736	0.8007786065832116	-4.83496
1:44002312-44002985:-	-0.274406	-2.9158	-1.20397	0.22891938667037803	0.3966518578117283	-5.24762	ENSG00000196517	SLC6A9	GBA_Control_v_Control	-0.0903231	-1.9244	-0.277154	0.7817276295152902	0.9821086447545352	-5.47123
1:47287550-47300152:-	-0.258755	-3.00857	-1.19949	0.23065330595168224	0.3988330594159366	-5.24812	ENSG00000123473	STIL	GBA_Control_v_Control	-0.000825255	-4.66347	-0.00316396	0.997476	0.9992617121262675	-5.68342
1:26941456-26941818:+	-0.299559	-2.17372	-1.24236	0.2144305436425653	0.3781815995544823	-5.24832	ENSG00000090273	NUDC	GBA_Control_v_Control	-0.011259	0.9916147697119654	-0.0261077	0.9791774021785054	0.9971506702600866	-5.50669
10:5773841-5800705:-	-0.275607	-2.84743	-1.20945	0.22680818042907883	0.3943401222529151	-5.25071	ENSG00000057608	GDI2	GBA_Control_v_Control	1.8635222310929862	-1.04389	2.353215604073874	0.018832311113479973	0.5181226712443692	-3.19137
12:89466769-89472275:-	-0.403381	-2.56842	-1.21904	0.22315668159442997	0.38948032057905185	-5.25107	ENSG00000139323	POC1B	GBA_Control_v_Control	-0.410694	-1.4769	-0.659498	0.5097498078643974	0.9192732117699425	-5.32261
15:93000511-93014909:+	0.23854433494952465	-1.79487	1.2770114118163076	0.20192930502778936	0.36312091636006966	-5.25623	ENSG00000173575	CHD2	GBA_Control_v_Control	0.4678435735370945	2.5872164652031766	1.0158725872870984	0.30997090561685264	0.8559777364617792	-5.11382
8:123077110-123084340:+	-0.265493	-1.81351	-1.25983	0.20806056925700975	0.36966528654234854	-5.25795	ENSG00000156787	TBC1D31	GBA_Control_v_Control	1.0108191650576845	0.0548064	2.094101662683656	0.036538157782604476	0.6278743191681722	-3.66953
X:132281094-132283032:+	-0.265137	-1.47478	-1.28952	0.19754985136138548	0.36013693620700027	-5.25836	ENSG00000232160	RAP2C-AS1	GBA_Control_v_Control	-0.0056411	-2.1985	-0.0274391	0.9781157572311959	0.9971506702600866	-5.52387
3:170145422-170149244:-	-0.187216	1.1271658352757576	-1.4421	0.14962440994473084	0.2994979001642179	-5.25996	ENSG00000173889	PHC3	GBA_Control_v_Control	-0.480821	1.7151319269737668	-0.983366	0.3256992639574232	0.8587242186068984	-5.1253
1:235830225-235833667:-	-0.260472	-2.77074	-1.19186	0.23363133676870104	0.4027382078384487	-5.26262	ENSG00000143669	LYST	GBA_Control_v_Control	0.7809034906830217	4.636014939185383	1.0579571486118966	0.2903669897531827	0.8463996107562392	-5.08856
1:15630324-15651895:+	-0.257807	-1.31581	-1.29965	0.19405645619341108	0.3560882950259423	-5.26627	ENSG00000197312	DDI2	GBA_Control_v_Control	1.2660674297890626	-1.99587	2.0769741167808284	0.038095258881855526	0.6278743191681722	-3.70812
1:202154490-202155134:-	-0.271023	-3.28575	-1.17167	0.24164160868873832	0.41091948443104476	-5.26729	ENSG00000143851	PTPN7	GBA_Control_v_Control	-0.493042	-2.57286	-1.77428	0.0763644	0.6675788786005744	-4.21149
21:46397264-46402483:+	0.2645098147583065	-2.26447	1.2245974580010832	0.22104903833997425	0.38700869173390695	-5.26786	ENSG00000160299	PCNT	GBA_Control_v_Control	0.659451	-0.910451	1.5716355327499547	0.11639664963815238	0.7357016639037067	-4.46304
16:31297513-31297954:+	-0.152668	1.3015342021070675	-1.43805	0.1507689588189875	0.3010000973330321	-5.26817	ENSG00000169896	ITGAM	GBA_Control_v_Control	0.3631105100795189	2.711447822439245	1.2776459157798452	0.20171310475175522	0.8027947461613064	-4.86612
7:99403397-99404953:-	-0.326103	-2.88061	-1.18996	0.2343784789990749	0.40319822360599056	-5.26936	ENSG00000106244	PDAP1	GBA_Control_v_Control	-0.199465	1.3603482893146823	-0.313073	0.7542996365441399	0.9794811212355847	-5.48136
17:47137151-47172064:-	0.2550227345059204	-2.13978	1.2377061155157758	0.21614953578575535	0.3804141201093116	-5.27066	ENSG00000239291,ENSG00000262265,ENSG00000004897	AC002558.1,AC002558.3,CDC27	GBA_Control_v_Control	0.2363027116052634	-4.77886	0.6451726750076648	0.5189996011658493	0.9210556552849787	-5.49453
4:139125163-139139497:-	-0.301391	-2.24198	-1.21941	0.22301042278289893	0.38948032057905185	-5.27072	ENSG00000109381	ELF2	GBA_Control_v_Control	2.873275197555044	-0.0530293	3.6213047115642065	3.099791538802163e-4	0.2602274996824416	-0.0394396
20:47262287-47283648:-	-0.23399	-2.52537	-1.20926	0.22688061828249909	0.3943401222529151	-5.27136	ENSG00000101040	ZMYND8	GBA_Control_v_Control	-0.562662	0.0423479	-1.09536	0.2736600408674943	0.84418	-4.99894
14:49825866-49831361:-	-0.276668	-2.96912	-1.18393	0.23675452203547387	0.4064528041897348	-5.27449	ENSG00000165525	NEMF	GBA_Control_v_Control	-0.0436418	0.2786017939519903	-0.0872872	0.9304631724990617	0.9915398309595024	-5.50615
3:130930415-130941699:+	-0.262261	-2.96528	-1.17678	0.23959543357599442	0.4089309777589197	-5.27963	ENSG00000017260	ATP2C1	GBA_Control_v_Control	0.7532869376005464	0.9570356799776921	1.3717729693035055	0.17048577958681585	0.7871086807533572	-4.71838
11:3500465-3501281:-	0.308382	-2.77819	1.1904201440225233	0.23419729883440882	0.40319822360599056	-5.28192	ENSG00000255367,ENSG00000284605	AC127526.2,AC127526.3	GBA_Control_v_Control	0.4056396333374259	-3.20366	1.3189319653656235	0.18753690392843975	0.8007786065832116	-4.81249
13:28256291-28261458:+	-0.298185	-1.23581	-1.27901	0.2012266032110347	0.36289953468456204	-5.28325	ENSG00000152520	PAN3	GBA_Control_v_Control	-0.119691	-2.38978	-0.209903	0.8337926193107811	0.9821086447545352	-5.57065
11:96091891-96093517:-	0.22731926837314287	-2.42629	1.1982030757409623	0.23115505286985238	0.3992894380334179	-5.28475	ENSG00000184384	MAML2	GBA_Control_v_Control	0.23123142773037042	0.5543464686074351	0.6586692182031111	0.5102814969443635	0.9192732117699425	-5.32474
1:155670319-155679512:-	-0.24008	-2.79987	-1.18052	0.23810652406364663	0.4075238062210629	-5.28514	ENSG00000163374	YY1AP1	GBA_Control_v_Control	-0.243139	-2.45404	-0.396403	0.6919045129851467	0.9631176654860899	-5.47974
15:89113724-89116521:+	-0.216084	0.8413985210832332	-1.40585	0.16011652825858502	0.3129302473403955	-5.28707	ENSG00000140526	ABHD2	GBA_Control_v_Control	0.255623	2.648717885797129	0.4745848779791575	0.6352013184591885	0.9438913193471123	-5.4661
10:124681606-124696212:-	-0.214719	-2.17398	-1.20168	0.22980700756705263	0.39777934608771276	-5.28717	ENSG00000258539,ENSG00000189319	AC068896.1,FAM53B	GBA_Control_v_Control	-0.75664	1.8969571530912694	-1.68011	0.0932925	0.6963735360482091	-4.33736
7:74782938-74783632:+	-0.534386	0.10380552439407806	-1.35167	0.17683285571625046	0.3362427686835612	-5.28889	ENSG00000158517	NCF1	GBA_Control_v_Control	-0.632734	3.599271568089048	-1.00215	0.31655049797831486	0.8559777364617792	-5.13958
X:77988241-78003236:+	-0.257837	-2.76831	-1.1704	0.24215125883190125	0.41109399755183235	-5.2951	ENSG00000165240,ENSG00000102144	ATP7A,PGK1	GBA_Control_v_Control	0.9245427940581994	-0.340941	1.3852473528992035	0.1663299149319508	0.7871086807533572	-4.70046
14:102194937-102209862:+	-0.202153	-1.75071	-1.23477	0.21723839409556633	0.3819301190434093	-5.29572	ENSG00000140153	WDR20	GBA_Control_v_Control	0.5066127682423733	2.2837591794828893	1.7311328785208586	0.0837805	0.6837243181037749	-4.26881
15:68141945-68146700:+	-0.265691	-2.95264	-1.15779	0.24725851256246567	0.41849500261328615	-5.29782	ENSG00000033800	PIAS1	GBA_Control_v_Control	0.23195312473902385	0.8423561140407951	0.386746	0.699038	0.9631176654860899	-5.44422
22:41808874-41813822:+	-0.242139	-3.08935	-1.14957	0.2506285763695705	0.42207159450803294	-5.29934	ENSG00000100147	CCDC134	GBA_Control_v_Control	-0.817884	-1.74998	-2.75981	0.00590427	0.3941686450609576	-2.32091
8:120453846-120461255:+	-0.262872	-2.60383	-1.17127	0.24180372282184173	0.41091948443104476	-5.29948	ENSG00000172167	MTBP	GBA_Control_v_Control	-0.663551	0.064622	-1.94398	0.052218684824123514	0.648659	-3.92133
18:56610992-56638505:-	-0.265325	-3.24311	-1.14689	0.2517339959250471	0.42266137915815405	-5.29982	ENSG00000091164	TXNL1	GBA_Control_v_Control	0.16941276550202478	0.3747417778561656	0.25454	0.7991383610350948	0.9821086447545352	-5.47799
17:64821766-64822393:-	-0.267589	-1.58772	-1.22491	0.2209297955368319	0.38700869173390695	-5.30095	ENSG00000214176,ENSG00000284172	PLEKHM1P1,MIR4315-2	GBA_Control_v_Control	-0.271258	2.2676929399171706	-0.831435	0.40595486337424447	0.8827087649054147	-5.24462
15:65722847-65738875:-	0.22139788850040287	-1.62454	1.2475061866596493	0.2125381570487881	0.3764257021992776	-5.30103	ENSG00000174485	DENND4A	GBA_Control_v_Control	-0.331341	0.4125707750989246	-0.459294	0.6461369025928108	0.9528145891542424	-5.42271
1:171523220-171532961:+	0.28833777991103116	-2.9955	1.1471414711598678	0.25162961474426165	0.42266137915815405	-5.30566	ENSG00000117523	PRRC2C	GBA_Control_v_Control	1.4827067676243946	2.218821712867671	2.1807100804656163	0.029470602510542128	0.6058918142876922	-3.52236
10:11270665-11288552:+	0.2287622463193011	-3.19762	1.136557504937002	0.25602742857393174	0.42773139559764317	-5.3062	ENSG00000048740	CELF2	GBA_Control_v_Control	-0.250092	2.9653414950301222	-0.31223	0.7549400893455269	0.9795551854800152	-5.50524
18:79695224-79704917:+	-0.249222	-2.86128	-1.15199	0.2496341649670144	0.42124197284383635	-5.30724	ENSG00000060069	CTDP1	GBA_Control_v_Control	-0.764968	1.772902741740011	-1.48954	0.13670569416224068	0.7650962016613404	-4.58726
10:45457784-45464327:-	-0.308889	-2.58975	-1.17662	0.23965936993137402	0.4089309777589197	-5.30757	ENSG00000165406	MARCHF8	GBA_Control_v_Control	-0.292156	3.119163478471421	-0.430873	0.6666671817415948	0.9579118935070294	-5.49506
12:82369386-82403130:+	-0.247366	-2.24558	-1.18398	0.23673699266296228	0.4064528041897348	-5.30874	ENSG00000127720	METTL25	GBA_Control_v_Control	-0.252578	-3.10976	-0.488256	0.6254906581467561	0.9385154736625589	-5.45466
16:85633913-85634132:+	0.17435448828296618	4.703045961977175	1.5937659757287952	0.11134140644021995	0.24695141534098983	-5.31541	ENSG00000131149	GSE1	GBA_Control_v_Control	0.10506071184068144	1.69985	0.5869358952956722	0.5573981045722487	0.9283558963272281	-5.38704
16:67744287-67772086:-	-0.250524	-3.16188	-1.1318	0.2580216329323759	0.43012163209523135	-5.31812	ENSG00000141084	RANBP10	GBA_Control_v_Control	-0.664564	-1.65446	-1.02395	0.30614352607504064	0.8559777364617792	-5.06811
1:61694696-61696534:-	-0.311832	-2.01578	-1.19544	0.23223282023215028	0.40073885423410105	-5.32237	ENSG00000162604	TM2D1	GBA_Control_v_Control	-0.26104	0.8160697330026699	-0.497003	0.6193120243567987	0.937919	-5.40725
16:50675769-50677535:-	-0.239482	-2.94149	-1.1238	0.26140108566694725	0.4332600422850982	-5.32861	ENSG00000167208	SNX20	GBA_Control_v_Control	-0.714905	1.6831780082232846	-1.37499	0.16948659939814276	0.7871086807533572	-4.72415
20:47276313-47287284:-	-0.205515	-0.289135	-1.31909	0.18747715365156006	0.3490266240225532	-5.33034	ENSG00000101040	ZMYND8	GBA_Control_v_Control	1.9124668703563903	-1.71324	3.3988087793047423	7.073808695760422e-4	0.269094	-0.677245
11:16095995-16097688:-	-0.257888	-0.932782	-1.2454	0.21331036075883542	0.3773952536502473	-5.33369	ENSG00000110693	SOX6	GBA_Control_v_Control	-0.128192	-5.44628	-0.405271	0.6862411092817345	0.9604432197693615	-5.6456
3:170113359-170122744:-	-0.230122	-2.10797	-1.17161	0.24166462487878926	0.41091948443104476	-5.33371	ENSG00000173889	PHC3	GBA_Control_v_Control	0.1003048623114573	-3.67905	0.18175949268323544	0.8558135763118322	0.9821086447545352	-5.57119
9:33986759-34017189:-	-0.240372	-0.92063	-1.26734	0.20536199756218865	0.36681148287969656	-5.3342	ENSG00000137073	UBAP2	GBA_Control_v_Control	0.0936412	-0.338967	0.3960308858562733	0.6921787548289189	0.9631176654860899	-5.42705
17:20204332-20232405:+	-0.235658	-2.21805	-1.16471	0.2444450303158981	0.4145688948488817	-5.33628	ENSG00000263494,ENSG00000128487	AC004702.1,SPECC1	GBA_Control_v_Control	-0.00175033	2.9506067833634444	-0.00489357	0.9960966290322631	0.9990718280437094	-5.55906
18:51058124-51059916:+	-0.232097	-2.96551	-1.11461	0.2653176362995272	0.4371622289959825	-5.33751	ENSG00000141646,ENSG00000267699	SMAD4,AC091551.1	GBA_Control_v_Control	-0.698534	0.720078	-1.16432	0.2446109642418899	0.8347597743132787	-4.93904
13:48253807-48261321:+	-0.214972	-2.50266	-1.13835	0.2552776060355672	0.42711660355869246	-5.3402	ENSG00000136156	ITM2B	GBA_Control_v_Control	-0.0929755	5.855715015828411	-0.109703	0.9126699542338612	0.9869370526719986	-5.57765
10:89751345-89762835:+	-0.281204	-2.47611	-1.15106	0.250014	0.42145981518805004	-5.34049	ENSG00000138182	KIF20B	GBA_Control_v_Control	-0.427975	-0.967027	-1.26824	0.2050482693110835	0.8059861096765057	-4.82227
9:36375933-36390616:-	-0.233138	-2.97686	-1.11591	0.26475819600123174	0.4366689696326798	-5.34052	ENSG00000137075	RNF38	GBA_Control_v_Control	0.2778082013000014	-3.5529	0.5132193199337834	0.6079274780784099	0.937919	-5.45812
4:94573350-94586444:+	0.271908	-3.18638	1.099987343483849	0.27163331090160137	0.4445149405495017	-5.3468	ENSG00000163110	PDLIM5	GBA_Control_v_Control	1.0508647274691327	-0.20699	1.9964167318702501	0.0461981	0.641135	-3.84054
11:9286454-9299701:-	-0.237044	-3.03041	-1.10626	0.2689098299568837	0.44048741902205624	-5.3494	ENSG00000166471	TMEM41B	GBA_Control_v_Control	-0.110501	0.7939033971454096	-0.21635	0.8287655802287176	0.9821086447545352	-5.48398
21:31700994-31706357:-	-0.198588	-2.77562	-1.12169	0.2622937345289173	0.4338829362305932	-5.35189	ENSG00000156304	SCAF4	GBA_Control_v_Control	-0.244339	-0.617868	-0.961615	0.3365087712370556	0.8605768339808534	-5.11644
15:101235081-101235577:-	-0.219469	-1.64218	-1.17721	0.23942324660541814	0.4089309777589197	-5.35261	ENSG00000131873	CHSY1	GBA_Control_v_Control	0.10152005689969723	3.2994578662678435	0.35474047363789124	0.7228694898135795	0.9670804091739919	-5.50724
17:59935192-59940943:+	-0.2431	-2.67292	-1.11265	0.2661569030912235	0.4377404888940414	-5.35406	ENSG00000267318,ENSG00000108443	AC005702.1,RPS6KB1	GBA_Control_v_Control	-0.172953	1.0275996869227373	-0.384803	0.7004769546783974	0.9631176654860899	-5.44918
12:122568260-122577029:+	-0.246556	-3.22959	-1.09356	0.27444144085487276	0.4478009515989615	-5.35835	ENSG00000184445	KNTC1	GBA_Control_v_Control	0.13545806943520455	-1.48025	0.3112891596193324	0.7556549628501444	0.9797256236489518	-5.46908
15:63712774-63716473:-	-0.243721	-2.93224	-1.10741	0.26841427820909364	0.44048741902205624	-5.35837	ENSG00000103657	HERC1	GBA_Control_v_Control	0.26992358385458104	-3.23491	0.41786543011826816	0.6761480417164933	0.9579118935070294	-5.4977
13:40940920-40943925:-	-0.224367	-2.38586	-1.1246	0.26106138169897564	0.43312456509148234	-5.35841	ENSG00000120690	ELF1	GBA_Control_v_Control	0.1453413325686128	2.6992943915131895	0.2730849127657872	0.7848523897512366	0.9821086447545352	-5.51884
3:47097954-47106120:-	-0.2622	-1.35025	-1.20715	0.227693	0.3953434709745965	-5.35885	ENSG00000181555	SETD2	GBA_Control_v_Control	0.4942283866497661	0.0320366	0.7896034816531917	0.4299733107416315	0.8914236720134187	-5.24507
1:95143890-95173889:+	-0.189797	2.1703347288102344	-1.42546	0.15437341023580867	0.30529205628495026	-5.36169	ENSG00000271092,ENSG00000152078	TLCD4-RWDD3,TLCD4	GBA_Control_v_Control	-0.160987	-1.74653	-0.348597	0.7274760649378182	0.9673821440412214	-5.44881
16:11020192-11061022:+	-0.188285	-0.110974	-1.30249	0.19308357758373118	0.35530869923212816	-5.36204	ENSG00000229917,ENSG00000274038,ENSG00000038532	RPL7P46,AC007014.2,CLEC16A	GBA_Control_v_Control	0.5816222002617144	0.5797628566727029	1.740586733656229	0.0821076	0.6824683866588294	-4.24017
3:71041327-71053773:-	-0.17403	-0.826423	-1.25565	0.20957184769791287	0.37195679945538657	-5.36305	ENSG00000285708,ENSG00000114861	AC097634.4,FOXP1	GBA_Control_v_Control	0.106644	-3.46999	0.17544473206203168	0.8607707900894069	0.9821086447545352	-5.55379
3:143985542-143989837:+	-0.309074	-0.141075	-1.30312	0.19287353350598635	0.35530869923212816	-5.36374	ENSG00000181744	DIPK2A	GBA_Control_v_Control	-0.170511	1.067311950008991	-0.519863	0.6032905810919099	0.937919	-5.39637
3:16884821-17014911:+	-0.24793	-2.70438	-1.11257	0.2661900173679668	0.4377404888940414	-5.36679	ENSG00000283885,ENSG00000154822	MIR3714,PLCL2	GBA_Control_v_Control	-0.451597	2.5496982571701423	-0.87704	0.3807057172572924	0.8823077098619806	-5.21901
16:89305205-89317075:-	-0.220667	-2.86461	-1.07808	0.28129	0.4563793993844765	-5.37587	ENSG00000167522	ANKRD11	GBA_Control_v_Control	-0.538374	1.2054200418208942	-1.07201	0.2840108939154502	0.8441858999972556	-5.03163
6:34646600-34649830:-	0.24577108263221437	-3.14422	1.0728342016416983	0.28363459359346976	0.45708577884029616	-5.37595	ENSG00000196821	ILRUN	GBA_Control_v_Control	1.0065258585283825	1.0169605251165847	1.7673066267622926	0.0775254	0.6675788786005744	-4.19826
9:98018288-98026451:+	0.2807243628318883	-0.838596	1.229704556825985	0.21913202642135662	0.38485635184252903	-5.37865	NA	NA	GBA_Control_v_Control	-0.134617	-1.11853	-0.851352	0.39480681902689907	0.8827087649054147	-5.18891
15:34252169-34255392:-	0.22171787465021664	-3.047	1.0743781619853965	0.28294268924330485	0.45708577884029616	-5.37872	ENSG00000140199	SLC12A6	GBA_Control_v_Control	0.6471004538279583	2.1926242066535253	1.0906380379153946	0.275732	0.84418	-5.02952
3:183643479-183672484:+	-0.216469	-3.03612	-1.07466	0.2828183612784175	0.45708577884029616	-5.38254	ENSG00000114796	KLHL24	GBA_Control_v_Control	1.4685492347159705	-0.0344327	2.143742826862309	0.032328569357070396	0.6239042293163356	-3.58488
13:42953947-42970670:-	-0.285898	-2.89841	-1.07475	0.282778	0.45708577884029616	-5.38409	ENSG00000133106	EPSTI1	GBA_Control_v_Control	-0.09233	1.7924999383418732	-0.150458	0.8804380264999488	0.9826798758222193	-5.51345
16:11846500-11847806:-	-0.297146	-2.16552	-1.11639	0.2645580458912567	0.4366689696326798	-5.38551	ENSG00000171490	RSL1D1	GBA_Control_v_Control	0.49405058869183754	2.5125004774221584	1.000360322624411	0.31741275293686516	0.8559777364617792	-5.11978
9:137811460-137818138:+	-0.243237	-1.11641	-1.20472	0.22862795971078434	0.3965561408619906	-5.38696	ENSG00000181090	EHMT1	GBA_Control_v_Control	-0.228864	0.46083154514600194	-0.8655	0.38700153008976246	0.8823077098619806	-5.18669
15:42950261-42966286:-	-0.223691	-2.32767	-1.09919	0.2719794415287567	0.44464798668625366	-5.39108	ENSG00000159459	UBR1	GBA_Control_v_Control	0.19716191651384296	1.463832198200651	0.5641911272613052	0.5727686629293633	0.937919	-5.38319
17:67945408-67948306:+	0.24705179782816877	-2.49609	1.1176609751056386	0.2640116350877913	0.4362948182208677	-5.39299	ENSG00000171634	BPTF	GBA_Control_v_Control	0.7258938958353496	-0.0997497	2.1714	0.030169340616366676	0.6075423480878022	-3.53136
18:49331863-49379758:-	-0.225727	-2.90899	-1.06313	0.28800780189169023	0.4618577835493294	-5.39339	ENSG00000141627	DYM	GBA_Control_v_Control	-0.0337653	-0.291404	-0.0495468	0.9604948384459944	0.9951955291565148	-5.49583
16:66730111-66732505:-	-0.2031	-2.08369	-1.10856	0.26791691399754036	0.440149	-5.39687	ENSG00000135720	DYNC1LI2	GBA_Control_v_Control	0.403966	1.603598181432413	1.0331302217469414	0.30182845111084267	0.8553046509813077	-5.07306
21:15762890-15766141:+	-0.216554	0.2393405536407627	-1.28683	0.1984848011307793	0.3606666462105827	-5.39825	ENSG00000155313	USP25	GBA_Control_v_Control	0.7835286948467357	2.137729942388157	1.9958810495231627	0.046256476262965314	0.641135	-3.85462
20:49269941-49271750:-	0.23429898162402218	-1.74769	1.1433438729950647	0.25320146897156914	0.42470056583742716	-5.40989	ENSG00000124201	ZNFX1	GBA_Control_v_Control	0.5156454279231792	3.9066320119484486	1.3444930818211445	0.17913746362402205	0.7994054950997603	-4.80251
1:13769117-13773188:+	0.2230328794093568	-3.2978	1.0301823848727523	0.3032026136247477	0.4786208997312658	-5.4107	ENSG00000116731	PRDM2	GBA_Control_v_Control	0.13566135632500398	0.26515036992625074	0.27302931037518374	0.7848951166207652	0.9821086447545352	-5.47304
17:43521368-43522226:+	-0.221233	-3.06249	-1.04258	0.29742613865016965	0.47244889952094116	-5.41117	ENSG00000067596	DHX8	GBA_Control_v_Control	-0.569324	1.1391504008767461	-1.1102	0.2672178056520909	0.84418	-4.99375
6:42663257-42666245:+	-0.258731	-2.73815	-1.05393	0.29220130299027963	0.467689	-5.41275	ENSG00000024048,ENSG00000206848	UBR2,RNU6-890P	GBA_Control_v_Control	0.8904035188706736	-0.443555	1.3389780244776233	0.1809256034174562	0.7994054950997603	-4.76226
9:111386376-111391824:-	-0.274028	-1.94887	-1.10632	0.26888391241543697	0.44048741902205624	-5.41352	ENSG00000136813	ECPAS	GBA_Control_v_Control	-0.214856	2.0306503939450034	-0.556431	0.5780587525742974	0.937919	-5.40527
2:40428472-40430304:-	-0.179576	0.6415394441431662	-1.29263	0.1964740105610593	0.35895523801090157	-5.41422	ENSG00000183023	SLC8A1	GBA_Control_v_Control	1.616577166510269	-2.4355	2.7636281123282753	0.00583633	0.3941686450609576	-2.31225
16:88018427-88038011:+	-0.161892	-1.55809	-1.13863	0.2551641533606138	0.42711660355869246	-5.41576	ENSG00000172530	BANP	GBA_Control_v_Control	0.24618161312152775	0.010771879621949799	0.4605810765818512	0.6452136465525433	0.9528145891542424	-5.40924
4:146305925-146308975:-	-0.231842	-2.386	-1.065	0.2871635323972929	0.4613852353062725	-5.41578	ENSG00000120519	SLC10A7	GBA_Control_v_Control	0.41788361364064297	-1.24794	1.3737783466573092	0.16986226230301912	0.7871086807533572	-4.71093
12:100282942-100298175:+	-0.281807	-0.669551	-1.21771	0.22365906620824497	0.38966893622324306	-5.42192	ENSG00000136021	SCYL2	GBA_Control_v_Control	0.14990701272131354	1.933096416846322	0.45120478058298263	0.651954	0.9529980119380987	-5.45171
X:13666316-13680598:+	-0.191287	0.021620239529516805	-1.26542	0.20604963607312612	0.36751826738517546	-5.42209	ENSG00000176896	TCEANC	GBA_Control_v_Control	-0.00257451	-0.812287	-0.0117175	0.9906536476118534	0.9990718280437094	-5.48928
14:102040235-102040673:+	-0.284189	-2.1542	-1.0737	0.28324818215067726	0.45708577884029616	-5.42396	ENSG00000197102	DYNC1H1	GBA_Control_v_Control	-0.361156	1.3650836884110678	-0.895903	0.3705512398221348	0.880588	-5.18009
6:158707229-158725637:+	-0.220625	-2.55026	-1.04986	0.29406727724919257	0.46933361074277025	-5.42397	ENSG00000164674	SYTL3	GBA_Control_v_Control	-0.382798	1.6570603434507498	-0.893553	0.371807	0.8817289438376894	-5.186
17:82563353-82571870:+	-0.202746	-2.69	-1.04998	0.29401232227001256	0.46933361074277025	-5.42668	ENSG00000141568	FOXK2	GBA_Control_v_Control	0.0768512	-0.289925	0.21581961193311813	0.8291786628486204	0.9821086447545352	-5.47282
4:51863436-51891851:+	-0.252453	-3.15109	-1.02581	0.30525689145921103	0.48066203697022863	-5.42838	ENSG00000109184	DCUN1D4	GBA_Control_v_Control	0.16189662806052008	0.23467704143804163	0.2872286367227174	0.7740052741434287	0.9821086447545352	-5.46278
15:68141945-68173892:+	-0.202917	-2.86792	-1.03552	0.3007036055313123	0.47585424475690236	-5.4285	ENSG00000033800	PIAS1	GBA_Control_v_Control	0.2611254966282024	2.095368328625102	0.49113694124395835	0.6234527677970181	0.937919	-5.4302
1:211353238-211354467:+	0.2632231742321762	-2.81848	1.024615589958631	0.3058213616394791	0.48066203697022863	-5.43007	ENSG00000082512	TRAF5	GBA_Control_v_Control	0.9698019156863493	1.1475295157821868	1.897332351534487	0.058113115747173934	0.648659	-3.99958
18:12999420-13042334:+	-0.21168	-2.84995	-1.02924	0.3036468595808368	0.47870711477579814	-5.43164	ENSG00000101639	CEP192	GBA_Control_v_Control	0.13943372435475432	-0.277343	0.3399658186590152	0.7339638689320216	0.9681161654065235	-5.44913
15:98707561-98708107:+	-0.177829	-1.34893	-1.13805	0.25540504465332176	0.42711660355869246	-5.4357	ENSG00000140443	IGF1R	GBA_Control_v_Control	-0.169646	3.3408515957823055	-0.627563	0.5304541473963911	0.9210556552849787	-5.40596
22:32478980-32479275:+	-0.232263	-1.43746	-1.1254	0.26072074190319083	0.43298726573240104	-5.43637	ENSG00000100225	FBXO7	GBA_Control_v_Control	-0.608913	6.168551327054786	-1.31299	0.18953099658705855	0.8007786065832116	-4.84314
15:55338519-55348725:-	0.24733130479885856	-3.3499	1.00715	0.31413668491193947	0.48656410882578077	-5.43654	ENSG00000260916,ENSG00000277548,ENSG00000274765	CCPG1,AC018926.3,AC018926.1	GBA_Control_v_Control	0.7664816491327837	0.28042340370299534	1.2515760768609547	0.21105889990334517	0.8059861096765057	-4.85124
2:159745769-159748903:+	-0.220425	-3.21484	-1.01327	0.3112072014003614	0.48350517141590665	-5.43785	ENSG00000136536	MARCHF7	GBA_Control_v_Control	0.35678211781726876	1.1013621157492544	0.4287722189505906	0.6681945454203044	0.9579118935070294	-5.43824
7:141636959-141649333:+	-0.27314	-3.17084	-1.00885	0.3133209604753539	0.48574874666493006	-5.43854	ENSG00000006530	AGK	GBA_Control_v_Control	0.11812817078750992	-0.0567146	0.203957	0.8384343449214917	0.9821086447545352	-5.49305
11:16095995-16111923:-	-0.20329	-0.858629	-1.17543	0.24013428875668513	0.4093253510888064	-5.43932	ENSG00000110693	SOX6	GBA_Control_v_Control	0.14193303011079483	-5.24428	0.7965685731117318	0.4259329461464597	0.8902881037910305	-5.4084
1:77711746-77715868:-	-0.344098	-1.98698	-1.07277	0.28367086453340595	0.45708577884029616	-5.44052	ENSG00000077254	USP33	GBA_Control_v_Control	1.970449234545263	0.6627130822161519	3.2304332198449486	0.00128216	0.269094	-1.14771
9:136223762-136226874:-	-0.235265	-0.838082	-1.18224	0.23742477074605003	0.407187	-5.44079	ENSG00000165661	QSOX2	GBA_Control_v_Control	-0.151249	0.27696078771578714	-0.50236	0.6155403830853079	0.937919	-5.39022
9:77214328-77227485:+	-0.257076	-3.03812	-1.01682	0.3095117584819686	0.48296490937846215	-5.44317	ENSG00000197969	VPS13A	GBA_Control_v_Control	0.10262937222780688	-0.727219	0.20356857541533002	0.8387379892047548	0.9821086447545352	-5.47794
15:65715477-65756472:-	-0.222054	-1.59086	-1.1219	0.2622048831071091	0.4338829362305932	-5.44571	ENSG00000264737,ENSG00000174485	MIR4511,DENND4A	GBA_Control_v_Control	0.24755632313983877	-4.94645	0.6129427516505264	0.5401316295488977	0.9210556552849787	-5.46443
5:115539664-115542901:-	-0.246014	-2.91417	-1.01523	0.3102683849689376	0.4832473268672043	-5.44613	ENSG00000145780	FEM1C	GBA_Control_v_Control	0.45107983342288716	-0.719063	0.9375494355188578	0.3487347387418894	0.8638512846383748	-5.12851
11:16046513-16055901:-	-0.216442	-3.22593	-0.999533	0.31780686386327883	0.48736390414431796	-5.44766	ENSG00000110693	SOX6	GBA_Control_v_Control	-0.303744	-4.2127	-0.900384	0.3681639309927317	0.8801117196442911	-5.28578
7:105073618-105078963:+	-0.220233	-2.78878	-1.01989	0.308057	0.48248187079109267	-5.44833	ENSG00000005483	KMT2E	GBA_Control_v_Control	-0.773849	1.4668198882457868	-1.30869	0.1909822074411072	0.8007786065832116	-4.79967
16:67610823-67612121:+	-0.20208	-2.45104	-1.03926	0.29896586637718464	0.4739978183638272	-5.44862	ENSG00000102974	CTCF	GBA_Control_v_Control	-0.510355	1.2642483031020355	-1.37731	0.16876733055965146	0.7871086807533572	-4.71652
19:34194477-34215661:+	0.2205510416227361	-2.79259	1.016026885933952	0.3098910687155152	0.4831078035035748	-5.44921	ENSG00000257103	LSM14A	GBA_Control_v_Control	0.20552331569859916	0.49242262475519694	0.2647356305829916	0.791275	0.9821086447545352	-5.47584
4:184659339-184678394:+	-0.239147	-2.93672	-1.00479	0.3152707662608779	0.48736390414431796	-5.45078	ENSG00000164306	PRIMPOL	GBA_Control_v_Control	0.4474934989375745	-0.654341	0.9490012382704989	0.3428820385528156	0.8605768339808534	-5.12077
8:42048377-42049707:-	-0.21399	-3.17339	-1.00169	0.31676169199261733	0.48736390414431796	-5.45079	ENSG00000083168	KAT6A	GBA_Control_v_Control	-0.135257	2.652269560359377	-0.200522	0.8411189025656043	0.9821086447545352	-5.52508
10:45625950-45627105:-	-0.208694	-3.11312	-0.997968	0.3185643664869159	0.4880196818718356	-5.45286	ENSG00000172671	ZFAND4	GBA_Control_v_Control	-0.217716	-2.44798	-0.501377	0.6162317605766562	0.937919	-5.43287
1:21715388-21724095:-	-0.232102	-2.99612	-1.00424	0.31553453616698784	0.48736390414431796	-5.45311	ENSG00000090686	USP48	GBA_Control_v_Control	-0.74233	0.3038918693875101	-1.1743	0.24059244121092285	0.8307451706813072	-4.92599
11:120406117-120431911:+	-0.222638	-3.1183	-1.00089	0.31715174325630513	0.48736390414431796	-5.45385	ENSG00000196914	ARHGEF12	GBA_Control_v_Control	-0.606171	-1.2274	-1.2384	0.21590059810411866	0.8059861096765057	-4.85817
1:53800692-53832591:-	0.18145850352718496	-2.36938	1.0341730827251094	0.3013345130141839	0.47640362274088016	-5.45567	ENSG00000058804	NDC1	GBA_Control_v_Control	0.18997750021793558	0.7544254036818067	0.42925816635465164	0.6678410393078402	0.9579118935070294	-5.42493
15:65729071-65761438:-	-0.21651	-3.23118	-0.988739	0.32305813595099286	0.49220926521026953	-5.45742	ENSG00000174485	DENND4A	GBA_Control_v_Control	0.2743965150482257	-0.402762	0.34386458839730805	0.7310307466250243	0.9673821440412214	-5.45783
4:127921523-127939997:-	-0.163449	-1.2099	-1.13468	0.2568151721797625	0.4286209483994247	-5.45844	ENSG00000164073	MFSD8	GBA_Control_v_Control	0.6114642543941766	1.9022121579850162	2.0778178524078643	0.0380172	0.6278743191681722	-3.70842
9:36369718-36390616:-	0.1911460665057101	-2.08716	1.0634659800598638	0.2878574311848129	0.4618577835493294	-5.46145	ENSG00000137075	RNF38	GBA_Control_v_Control	0.10454377580993501	1.3799960731792122	0.34343209332060737	0.7313559041746183	0.9673821440412214	-5.46781
1:23030468-23050520:+	-0.225129	-2.32049	-1.02511	0.3055897678389246	0.48066203697022863	-5.46244	ENSG00000263793,ENSG00000004487	MIR3115,KDM1A	GBA_Control_v_Control	0.28927138507188666	0.10642793035275912	0.669043	0.503644	0.9161635314215265	-5.31067
3:196073929-196077122:-	-0.234091	-2.82261	-0.999452	0.3178460244419465	0.48736390414431796	-5.46307	ENSG00000072274	TFRC	GBA_Control_v_Control	0.2662312111616707	-1.19472	0.3520773937725312	0.7248650070807405	0.9670804091739919	-5.45129
4:48369848-48394653:+	0.21343319986775378	-3.08009	0.9892630150634915	0.3228017495690685	0.49220926521026953	-5.46318	ENSG00000109171	SLAIN2	GBA_Control_v_Control	0.5702885011753871	-1.70182	1.2299027067396793	0.2190641540198757	0.8059861096765057	-4.87493
8:38943788-38946221:+	-0.180333	-1.69698	-1.06904	0.2853416007995057	0.4588970763815805	-5.46936	ENSG00000169499	PLEKHA2	GBA_Control_v_Control	0.2616022087399017	2.757217174937868	0.8632882123305662	0.38821556470344765	0.8823077098619806	-5.23337
10:110881232-110890670:+	0.19047096447306688	-3.02649	0.977846	0.32841460903329767	0.497661	-5.47122	ENSG00000150593	PDCD4	GBA_Control_v_Control	1.1105264862161972	0.0749661	1.3950288693148498	0.16336116331811606	0.7871086807533572	-4.69245
4:139889356-139890967:-	0.18938350477259003	-2.81431	1.0004218209323457	0.31737671917742266	0.48736390414431796	-5.47187	ENSG00000196782	MAML3	GBA_Control_v_Control	0.5266085635652615	0.5462455446449307	1.4575	0.14533660060232706	0.7771342433481119	-4.61469
5:21491320-21497196:+	0.5797181584278359	-1.33577	1.0904103088232844	0.2758338083889296	0.44963588765535223	-5.47593	ENSG00000279107,ENSG00000183666	AC138951.2,GUSBP1	GBA_Control_v_Control	0.7073552894700574	-1.03334	1.3327205531987576	0.18297049258643674	0.8007786065832116	-4.76891
8:123077110-123101007:+	-0.207007	-3.12509	-0.970698	0.33196078429325515	0.5003250958962077	-5.47737	ENSG00000156787	TBC1D31	GBA_Control_v_Control	-0.492234	0.8126925266593541	-0.936888	0.34907457754429516	0.8638512846383748	-5.13805
19:33113766-33114419:+	-0.247777	-2.21999	-1.01929	0.30834011158954283	0.48248187079109267	-5.47762	ENSG00000076650	GPATCH1	GBA_Control_v_Control	0.2707948414237915	-0.735709	0.9433846483944657	0.34574450610413965	0.8638512846383748	-5.1203
1:1223243-1223968:-	-0.194276	-0.591206	-1.15895	0.24678412025539287	0.4181135599483397	-5.47805	ENSG00000078808	SDF4	GBA_Control_v_Control	-0.158738	2.4890668115393413	-1.08736	0.27717815867716233	0.84418	-5.05027
7:66797373-66805396:+	-0.223667	-2.44098	-1.00242	0.3164104606416725	0.48736390414431796	-5.48437	ENSG00000154710,ENSG00000284461	RABGEF1,AC027644.4	GBA_Control_v_Control	0.24155511624961923	0.5883097044608763	0.5788739847582512	0.5628231988102765	0.9300985736244629	-5.36201
5:168488601-168497348:+	-0.304084	-2.30909	-1.00595	0.3147140958693633	0.4870091861425446	-5.48853	ENSG00000113643	RARS1	GBA_Control_v_Control	0.2973922678537284	1.45864	0.48322417332517886	0.6290574736946711	0.9405053413475982	-5.42111
3:51541588-51590559:+	0.2112567570078533	-2.73501	0.9692722534057531	0.33267113716576113	0.5009460442164242	-5.48981	ENSG00000164080	RAD54L2	GBA_Control_v_Control	-0.21691	0.0905383	-0.41765	0.6763053859229967	0.9579118935070294	-5.4226
21:33426883-33432871:+	-0.190082	-2.5306	-0.98117	0.32677404106227814	0.4961483646102386	-5.49003	ENSG00000159128	IFNGR2	GBA_Control_v_Control	-0.0108368	4.191809720466399	-0.0204945	0.9836535346243478	0.9971506702600866	-5.56584
16:53254437-53274302:+	-0.207959	-2.68576	-0.976527	0.3290673093243326	0.4982001914838183	-5.49156	ENSG00000177200	CHD9	GBA_Control_v_Control	-0.209046	1.0630315227062797	-0.456134	0.6484069418010723	0.9529980119380987	-5.42215
X:51327720-51357027:-	-0.179899	-0.802246	-1.1307	0.2584828628851033	0.43012163209523135	-5.49349	ENSG00000229151	AC233976.1	GBA_Control_v_Control	0.10345847305805078	0.31031357597235754	0.45103242506139907	0.6520778876099478	0.9529980119380987	-5.41246
15:41371526-41377304:+	-0.224182	-3.10008	-0.953805	0.34044005111889364	0.5103561123469843	-5.49669	ENSG00000285920,ENSG00000137804	AC087721.2,NUSAP1	GBA_Control_v_Control	0.7045574686136795	-2.70604	1.298943730558492	0.1943054605667548	0.8007786065832116	-4.82049
14:89411933-89412490:-	-0.207195	-1.95	-1.02414	0.3060460229115113	0.48066203697022863	-5.49748	ENSG00000259053,ENSG00000053254	AL137230.2,FOXN3	GBA_Control_v_Control	0.6745039509774919	1.9445295058421335	1.1447373293348198	0.2526310443210453	0.842534	-4.98144
15:65729071-65732818:-	-0.188301	-1.40689	-1.06928	0.2852308492414604	0.4588970763815805	-5.49811	ENSG00000174485	DENND4A	GBA_Control_v_Control	0.35389509946934794	-0.378799	0.73355	0.4634197510931046	0.8992031284658809	-5.27118
9:112262434-112297916:-	-0.190202	-2.67975	-0.964769	0.3349209720005736	0.5038819999901103	-5.50109	ENSG00000243911,ENSG00000119314,ENSG00000230081	RN7SL430P,PTBP3,HSPE1P28	GBA_Control_v_Control	-0.0258447	-0.0766351	-0.0399951	0.9681061941343183	0.9964404752602921	-5.50077
8:21974669-21985691:+	0.19194402932183527	-3.11589	0.9418406208291259	0.3465283031548606	0.5153419140806119	-5.50237	ENSG00000130227	XPO7	GBA_Control_v_Control	0.5550239135609258	-4.06576	1.0840859286656612	0.278625	0.84418	-5.09669
3:49967469-49975392:+	-0.291391	-1.34754	-1.08304	0.2790870345213002	0.453618	-5.50263	ENSG00000004534	RBM6	GBA_Control_v_Control	-0.315567	1.5277656078523787	-0.565678	0.5717574916359727	0.937919	-5.3925
3:193657079-193667280:+	0.21314667173426738	-0.620645	1.1489316613240688	0.250891	0.42209018771862644	-5.50318	ENSG00000198836	OPA1	GBA_Control_v_Control	0.1852669935181943	-0.0447866	0.2992657537585066	0.7648083568224477	0.9821086447545352	-5.4655
22:46974289-46978934:+	-0.206607	-2.86053	-0.947981	0.34339511159137837	0.512654	-5.50409	ENSG00000054611	TBC1D22A	GBA_Control_v_Control	0.10801954269425273	-1.57245	0.20622241448657125	0.8366651581169408	0.9821086447545352	-5.48319
10:11597630-11601980:-	-0.342482	-0.452898	-1.15485	0.2484668681799145	0.4201166884935312	-5.5043	ENSG00000148429	USP6NL	GBA_Control_v_Control	0.0889657	-1.18628	0.19214639008113635	0.847672	0.9821086447545352	-5.48114
20:47246007-47262428:-	0.197387	-2.54216	0.97577	0.32944189716821926	0.4983179687796758	-5.50669	ENSG00000101040	ZMYND8	GBA_Control_v_Control	0.0179151	1.9416048141943898	0.0468582	0.9626369331308784	0.9951955291565148	-5.53545
13:28174271-28177935:+	-0.245836	-1.84419	-1.01052	0.3125198789817347	0.48495459963986376	-5.50898	ENSG00000152520	PAN3	GBA_Control_v_Control	1.2693122977055182	1.2268993245724247	2.3418526911039645	0.019411773684805806	0.5181226712443692	-3.21565
1:227193785-227317246:-	-0.192835	-2.78855	-0.947454	0.343663	0.512654	-5.50905	ENSG00000143776,ENSG00000236636	CDC42BPA,AL627308.2	GBA_Control_v_Control	-0.620235	-1.30352	-1.46381	0.14360398696105836	0.7727919682936442	-4.60862
X:361404-362332:-	-0.192129	-1.84336	-1.01308	0.31129785008969335	0.48350517141590665	-5.5097	ENSG00000167393	PPP2R3B	GBA_Control_v_Control	0.4343306015076682	-1.179	1.8116681917031456	0.0703801	0.648659	-4.12501
17:1842802-1853189:+	-0.257449	-2.27573	-0.980468	0.3271210480187815	0.4961483646102386	-5.50979	ENSG00000132383	RPA1	GBA_Control_v_Control	0.3571133355419578	-0.122701	0.9125719601908246	0.3617190953361248	0.87511	-5.14565
6:42822795-42830172:+	-0.209403	-2.83824	-0.950381	0.34217521617148516	0.5125	-5.51009	ENSG00000112624	BICRAL	GBA_Control_v_Control	-0.566181	-2.23841	-0.908211	0.3640167799130166	0.878138	-5.17215
1:8541213-8614686:-	0.1957694538548158	-3.00478	0.932403	0.35137941002853834	0.5197938585356088	-5.5131	ENSG00000142599	RERE	GBA_Control_v_Control	-0.0114905	-2.20171	-0.0235363	0.9812278561303522	0.9971506702600866	-5.51827
1:153811730-153813452:-	-0.181112	-2.50337	-0.956973	0.33883919792377637	0.50841	-5.51445	ENSG00000143614	GATAD2B	GBA_Control_v_Control	0.22942663983330291	0.5333272288665895	0.7020573576240673	0.4828300836115974	0.9023692098170306	-5.29741
18:45739162-45739662:+	0.23831060021412637	-0.970367	1.0867359283276872	0.2774460209006786	0.4518252852495047	-5.51549	ENSG00000141469	SLC14A1	GBA_Control_v_Control	0.5498989952686397	2.2915625133458066	2.0964529651882313	0.036328559665179304	0.6278743191681722	-3.68133
6:34646600-34654779:-	-0.188808	-2.66857	-0.949342	0.3427029978301088	0.512654	-5.51753	ENSG00000196821	ILRUN	GBA_Control_v_Control	-0.414888	0.7095854831722987	-0.854884	0.39284952730998646	0.8827087649054147	-5.19791
12:14423908-14425473:+	-0.183354	-2.83801	-0.932587	0.3512846803082168	0.5197938585356088	-5.5193	ENSG00000171681	ATF7IP	GBA_Control_v_Control	0.2931864807297373	2.1080190348407077	0.5924713039578908	0.553688	0.9250172658990637	-5.38237
11:45862059-45872233:+	0.21119172569672906	-1.74375	1.0299596411097658	0.303307	0.4786208997312658	-5.51969	ENSG00000121671	CRY2	GBA_Control_v_Control	0.3085483402166225	1.0390774372456497	1.1272732232850704	0.259936	0.842534	-4.97659
11:1286001-1295794:-	0.15314424157740214	-1.49329	1.0451457513160056	0.2962377064485897	0.47101686857590225	-5.51994	ENSG00000078902	TOLLIP	GBA_Control_v_Control	0.393399	2.095822049562229	2.1790912772368407	0.0295909	0.6058918142876922	-3.52877
2:226906792-226914351:+	-0.206044	-3.05557	-0.923547	0.35597101217438576	0.5261226491556282	-5.52004	ENSG00000144468	RHBDD1	GBA_Control_v_Control	-1.26678	-1.59172	-2.45492	0.014285312766146729	0.5181226712443692	-2.98806
15:30474355-30484686:+	-0.319197	-1.9987	-0.99309	0.3209397787838833	0.49031655011659697	-5.52149	ENSG00000215302	AC127502.1	GBA_Control_v_Control	0.0841741	0.6485219517887639	0.16361177864117366	0.8700745576191664	0.9821086447545352	-5.49448
9:83659779-83686155:-	-0.182743	-2.39677	-0.974036	0.33030180272877685	0.4991689710005548	-5.52155	ENSG00000135018	UBQLN1	GBA_Control_v_Control	-0.463862	-4.34106	-0.983192	0.3257935242719442	0.8587242186068984	-5.19791
3:47056820-47067118:-	0.170744	-1.61314	1.0487487708025034	0.29457677947002275	0.4697002969897134	-5.52223	ENSG00000181555	SETD2	GBA_Control_v_Control	0.25795313080327587	-1.43887	0.45899296877619394	0.6463532222314264	0.9528145891542424	-5.41108
3:119500694-119504021:+	-0.250816	-0.675892	-1.12691	0.2600842973910173	0.432358	-5.5225	ENSG00000113845	TIMMDC1	GBA_Control_v_Control	1.1598882179825822	-1.63749	1.76531	0.0778602	0.6675788786005744	-4.20584
14:65432036-65455718:+	0.2058456023914772	-3.24338	0.9068924120213486	0.36470770842879974	0.5347210948224626	-5.52714	ENSG00000033170	FUT8	GBA_Control_v_Control	0.3582831033891769	0.3754359425877305	0.6974875174814036	0.485683	0.9050630904554174	-5.29898
12:123345257-123350441:-	-0.205941	-2.89956	-0.921342	0.35711984838122823	0.526893	-5.52902	ENSG00000207189,ENSG00000139697	Y_RNA,SBNO1	GBA_Control_v_Control	0.9084306219838965	0.9033860913572037	1.4736212698824576	0.14094327814680005	0.7708265928614896	-4.59829
11:2951258-2979237:-	-0.527603	-1.10072	-1.07742	0.2815924883609313	0.4563793993844765	-5.53201	ENSG00000207008,ENSG00000205531	SNORA54,NAP1L4	GBA_Control_v_Control	0.1426584542707583	-1.0194	0.1718278270903159	0.8636126231952002	0.9821086447545352	-5.48887
4:48590658-48605833:-	-0.213554	-2.77139	-0.919928	0.35785804966051815	0.527519	-5.53659	ENSG00000075539	FRYL	GBA_Control_v_Control	0.9032040785874287	-1.64231	1.3419143672470375	0.17997191140770694	0.7994054950997603	-4.75407
16:30479090-30479461:+	-0.198966	-2.63734	-0.916326	0.35974248299501865	0.5298312534637161	-5.53853	ENSG00000005844	ITGAL	GBA_Control_v_Control	0.6282183483143591	2.133237823346435	1.1058064274913548	0.269114	0.84418	-5.01236
18:76441244-76443211:-	-0.187073	-1.09818	-1.05159	0.29326924485190314	0.4689514877203289	-5.54216	ENSG00000101493	ZNF516	GBA_Control_v_Control	-0.0493512	2.000319911799101	-0.0783763	0.9375466335962789	0.9915398309595024	-5.54177
17:4189381-4192860:-	-0.235941	-2.53224	-0.932814	0.35116743548265184	0.5197938585356088	-5.54488	ENSG00000185722	ANKFY1	GBA_Control_v_Control	-0.417817	-0.903011	-0.86936	0.38488889758517897	0.8823077098619806	-5.17999
2:8943186-8962618:-	-0.218879	-1.40042	-1.02356	0.3063182725182517	0.48066203697022863	-5.54896	ENSG00000143797	MBOAT2	GBA_Control_v_Control	0.3761995683864354	-1.07556	1.0018335977855894	0.31670096294871986	0.8559777364617792	-5.07982
7:22960255-22991139:-	-0.211594	-2.63039	-0.905075	0.3656691895649631	0.534807	-5.55201	ENSG00000122591	FAM126A	GBA_Control_v_Control	-0.376665	0.5316139633417252	-0.845588	0.39801359374796375	0.8827087649054147	-5.2088
11:85981744-85990399:-	-0.221937	-2.83114	-0.898971	0.36891	0.5372324194328476	-5.55236	ENSG00000073921	PICALM	GBA_Control_v_Control	1.1455863466733145	-3.17856	1.7274467505181217	0.0844404	0.6837243181037749	-4.28584
1:29035825-29065158:+	-0.207326	-1.3563	-1.04135	0.2979935100016003	0.47290274413297434	-5.55244	ENSG00000277958,ENSG00000159023	Metazoa_SRP,EPB41	GBA_Control_v_Control	-0.9619	1.35043	-1.01259	0.31153793413799974	0.8559777364617792	-5.10632
4:2949933-2953645:-	-0.183405	-2.7516	-0.899798	0.3684696373278191	0.5372324194328476	-5.55342	ENSG00000087269	NOP14	GBA_Control_v_Control	0.0875719	1.5639684861292207	0.21147148901043816	0.8325686264710132	0.9821086447545352	-5.50074
1:63411925-63419440:+	-0.200332	-2.96872	-0.878472	0.37992317059047087	0.5470763322653521	-5.55438	ENSG00000088035	ALG6	GBA_Control_v_Control	-1.17939	0.7581717068817753	-2.35801	0.0185923	0.5181226712443692	-3.18187
16:28166507-28169909:-	-0.172068	-1.7519	-0.980661	0.32702495181422087	0.4961483646102386	-5.55483	ENSG00000169180	XPO6	GBA_Control_v_Control	1.60971	1.8952088363901942	2.493056661516252	0.012848708959018726	0.5016972637719171	-2.91023
7:105062163-105081797:+	-0.16364	-2.10017	-0.94606	0.34437332571985824	0.5130459750520338	-5.55687	ENSG00000005483	KMT2E	GBA_Control_v_Control	1.0992682221219514	2.7254655084405326	1.8096445848478746	0.070694	0.648659	-4.15885
17:49732279-49732720:-	-0.18833	-3.02461	-0.88212	0.3779485844964554	0.5452221287495137	-5.55713	ENSG00000121104	FAM117A	GBA_Control_v_Control	0.039170531913287565	-0.466931	0.073171692931441365	0.9416862163899147	0.9925242669922577	-5.49143
1:150226607-150229237:-	0.20507449298003944	-2.03772	0.9629874673548517	0.3358138291724786	0.504321	-5.55717	ENSG00000143401	ANP32E	GBA_Control_v_Control	0.6677028255014097	2.2302353639894736	1.5213906974770945	0.128523	0.7492720418662053	-4.55653
17:20245925-20260294:+	-0.176631	-2.5589	-0.909723	0.36321331855951167	0.5340062713322418	-5.55753	ENSG00000263494,ENSG00000128487	AC004702.1,SPECC1	GBA_Control_v_Control	-0.676288	-3.31238	-1.4795	0.13936757652877418	0.7697307927362231	-4.63312
19:10163325-10177367:-	0.19679529527503625	-1.79619	0.9848232862764391	0.32497694094041196	0.494684	-5.55753	ENSG00000130816	DNMT1	GBA_Control_v_Control	0.4010443612428216	2.325243383650896	1.5611376707353517	0.11885271708482387	0.7357016639037067	-4.50923
15:92945820-92967513:+	0.16759457581121673	-1.72796	0.9805167820304634	0.3270959676491808	0.4961483646102386	-5.56051	ENSG00000279765,ENSG00000173575	AC013394.1,CHD2	GBA_Control_v_Control	1.1731355138488535	1.3107996677265983	1.534253549338678	0.12532880786681536	0.7473876706656397	-4.53185
8:21977769-21980203:+	-0.20986	-2.54451	-0.8971	0.36990672174701844	0.5377258751629818	-5.56243	ENSG00000130227	XPO7	GBA_Control_v_Control	0.1907137510850676	-3.14488	0.3704524535776642	0.7111350639683152	0.9633841297999743	-5.5325
4:102714437-102736435:-	-0.175624	-2.61023	-0.890481	0.3734470572364845	0.5414659836788062	-5.56348	ENSG00000230069,ENSG00000109323,ENSG00000248971	LRRC37A15P,MANBA,KRT8P46	GBA_Control_v_Control	1.050069753061413	-1.01686	1.8096082146424497	0.0706996	0.648659	-4.13203
11:35196745-35211449:+	0.19331343856019623	-3.02953	0.8729237924302641	0.3829386707677005	0.5500959723530465	-5.56378	ENSG00000026508	CD44	GBA_Control_v_Control	0.8909199523466906	-0.282424	1.2898825130968874	0.19743229327768388	0.8007786065832116	-4.80534
5:143054438-143057747:+	-0.229589	-3.18122	-0.859245	0.39043557550728003	0.5544856866968301	-5.56488	ENSG00000145819	ARHGAP26	GBA_Control_v_Control	0.3665243494671333	-3.27592	0.5458996172011585	0.5852741025112722	0.937919	-5.45397
4:1900625-1935262:+	-0.182307	-2.78128	-0.885927	0.37589482418265385	0.5440753532781688	-5.56568	ENSG00000109685	NSD2	GBA_Control_v_Control	0.0616442	-0.419341	0.13760042534939185	0.8905878793397286	0.9837948889599599	-5.49069
10:12400015-12403369:+	-0.223532	-2.03144	-0.941857	0.34651992677154964	0.5153419140806119	-5.56646	ENSG00000183049	CAMK1D	GBA_Control_v_Control	0.3855533349136442	0.33135759848323004	0.9835493463982653	0.3256090461054054	0.8587242186068984	-5.0965
16:10969160-10982991:+	0.17497555955580413	-2.23053	0.9227523281047662	0.3563848899673434	0.5262710908136936	-5.56709	ENSG00000038532	CLEC16A	GBA_Control_v_Control	0.00220796	1.5549780305868894	0.00627729	0.994993	0.9990718280437094	-5.52368
2:219212386-219215082:-	-0.217399	-2.98161	-0.865126	0.38720117554803235	0.5537570474830888	-5.56843	ENSG00000115657,ENSG00000284820	ABCB6,AC068946.2	GBA_Control_v_Control	-0.779339	-1.46213	-2.22638	0.026242774193505236	0.6019291919756055	-3.43267
3:50252099-50253184:+	-0.161512	-2.29104	-0.899199	0.36878841215190616	0.5372324194328476	-5.57019	ENSG00000114353	GNAI2	GBA_Control_v_Control	0.27467322540628913	5.129135737515732	0.5994172992055319	0.5490498319639223	0.9227774453127383	-5.42145
11:76496214-76528466:+	0.17397505961577825	-3.17051	0.8587960938593666	0.3906828870532162	0.5544856866968301	-5.57145	ENSG00000158636	EMSY	GBA_Control_v_Control	0.016887144576336333	-0.294931	0.0354574	0.9717231250321035	0.9964404752602921	-5.49961
12:68713864-68714753:+	-0.236784	-3.16993	-0.861887	0.38898150035201406	0.5544856866968301	-5.57147	ENSG00000111581	NUP107	GBA_Control_v_Control	0.04675	-1.07153	0.1010676122598933	0.9195199440856306	0.9885407591470613	-5.49662
4:169580841-169590809:-	-0.201316	-2.38898	-0.898804	0.36899854209963634	0.5372324194328476	-5.5735	ENSG00000137601	NEK1	GBA_Control_v_Control	0.42410737726680425	-0.917621	0.7980999613238633	0.4250290530366536	0.8898052120306004	-5.22772
14:52511239-52544371:-	-0.174978	-1.54811	-0.993888	0.3205458536169557	0.49016073608640126	-5.57377	ENSG00000087301	TXNDC16	GBA_Control_v_Control	0.3252357878878298	-0.806854	0.814169	0.4157699081529912	0.8841341385585421	-5.21909
2:26364301-26373629:+	-0.18492	-1.93394	-0.934172	0.3504670059641335	0.5197938585356088	-5.57419	ENSG00000138018	SELENOI	GBA_Control_v_Control	0.3909329468752647	-0.388969	1.0733300380171384	0.2834190076880452	0.8441858999972556	-5.01041
X:154789953-154792285:-	-0.203692	-3.1669	-0.850271	0.3954017770976833	0.5596260004480997	-5.57622	ENSG00000130830	MPP1	GBA_Control_v_Control	-1.06869	3.6404733626513472	-1.26079	0.2077202673251097	0.8059861096765057	-4.87356
5:139600371-139614966:+	-0.311681	-0.685966	-1.05838	0.2901739175695472	0.4648874118313643	-5.5765	ENSG00000131508	UBE2D2	GBA_Control_v_Control	0.39971721170875263	1.8827380226792403	0.7543608114520223	0.4508355834056469	0.8979383035689463	-5.2867
3:127579739-127580163:-	-0.20187	-2.58648	-0.877749	0.38031563788744305	0.5471721988114969	-5.57731	ENSG00000163870	TPRA1	GBA_Control_v_Control	-0.102548	0.37468902701136714	-0.287163	0.7740554681201209	0.9821086447545352	-5.46319
7:28101618-28105070:-	-0.196431	-1.31943	-0.993926	0.32052768211129073	0.49016073608640126	-5.57805	ENSG00000153814	JAZF1	GBA_Control_v_Control	1.0239718025425093	-2.37016	2.057833926513124	0.0399019	0.641135	-3.74585
3:155828181-155842619:-	-0.188162	-2.91258	-0.861645	0.38911353989002706	0.5544856866968301	-5.57878	ENSG00000284952,ENSG00000169359	AC104472.3,SLC33A1	GBA_Control_v_Control	-0.611377	-0.0526955	-0.990502	0.32220245946625636	0.8559777364617792	-5.08637
7:158773340-158799072:-	-0.218655	-2.88062	-0.858083	0.3910761740703591	0.5545750813041663	-5.58354	ENSG00000117868	ESYT2	GBA_Control_v_Control	-0.288921	0.6141321818249509	-0.463699	0.6429790051525801	0.9519944882285555	-5.41561
11:85974707-85983973:-	-0.139194	-0.107319	-1.09715	0.27287073541017004	0.44567117193937306	-5.58471	ENSG00000073921	PICALM	GBA_Control_v_Control	0.65267	-3.06873	0.8701202875026534	0.38447333288079866	0.8823077098619806	-5.21515
12:2681653-2682612:-	-0.147909	-0.242109	-1.08604	0.2777530809504627	0.4518870377091346	-5.58494	ENSG00000246627	CACNA1C-AS1	GBA_Control_v_Control	-0.130702	-0.421079	-1.08625	0.2776696197973195	0.84418	-4.99853
12:111554157-111555919:-	0.1983922600369441	-3.0677	0.8414737768806252	0.4003072650057363	0.5652782993647025	-5.58675	ENSG00000204842	ATXN2	GBA_Control_v_Control	0.033029688710282556	-0.720467	0.0846904	0.932527	0.9915398309595024	-5.49407
13:21157921-21172681:-	0.1833985443345667	-2.67035	0.8689497846705898	0.3851074751556486	0.552174	-5.58709	ENSG00000165480	SKA3	GBA_Control_v_Control	-0.161971	-3.53798	-0.52245	0.6014890445958054	0.937919	-5.48201
9:33953284-33996333:-	-0.159525	-2.44969	-0.882051	0.3779860380371852	0.5452221287495137	-5.59162	ENSG00000137073,ENSG00000226801	UBAP2,OSTCP8	GBA_Control_v_Control	0.5996435324776046	-1.27868	0.9404655824263899	0.347238	0.8638512846383748	-5.13669
6:18236451-18258405:-	-0.255377	-2.29698	-0.883501	0.3772051083932648	0.5450321660863094	-5.59366	ENSG00000124795	DEK	GBA_Control_v_Control	-0.380809	1.7013370498556972	-0.58429	0.5591757707983653	0.9283558963272281	-5.38164
13:32319076-32326613:+	-0.188181	-2.5298	-0.870865	0.38406114483757825	0.5511441557113623	-5.59762	ENSG00000139618	BRCA2	GBA_Control_v_Control	0.7719021249224737	-2.46612	2.278541483889348	0.022934586288102007	0.5662819173194599	-3.33846
14:34551713-34554912:-	-0.195534	-0.707426	-1.0376	0.2997344022313235	0.4747679824022568	-5.5998	NA	NA	GBA_Control_v_Control	-0.304127	-1.99203	-1.75073	0.0803423	0.6778632079304663	-4.22017
17:20017986-20205912:+	-0.196115	-3.01059	-0.826938	0.4084923014164984	0.5744209163134848	-5.603	ENSG00000263494,ENSG00000225014,ENSG00000128487,ENSG00000225681	AC004702.1,KCTD9P1,SPECC1,AC005730.1	GBA_Control_v_Control	0.19900938493414788	-3.85022	0.36678771288842893	0.7138660623271782	0.9642647776728337	-5.55687
11:73707419-73718718:-	-0.192687	-2.20423	-0.888316	0.37460919572861195	0.542682	-5.60316	ENSG00000175582	RAB6A	GBA_Control_v_Control	-0.133824	3.6532298301770916	-0.355841	0.7220456686005318	0.9670804091739919	-5.51378
8:140572811-140605914:-	-0.1695	-2.96872	-0.821633	0.4115043568041852	0.5776775816802333	-5.60378	ENSG00000279766,ENSG00000123908	AC067931.1,AGO2	GBA_Control_v_Control	0.12756989512588635	-0.417615	0.18001331492846429	0.8571837995849088	0.9821086447545352	-5.48342
14:72714422-72731934:-	-0.18865	-2.39814	-0.861159	0.38938094679727964	0.5544856866968301	-5.60395	ENSG00000205683	DPF3	GBA_Control_v_Control	-0.241423	-1.61612	-0.842641	0.3996595596025969	0.8827087649054147	-5.20444
7:155700772-155707068:+	-0.163503	-2.65313	-0.847431	0.3969813807081026	0.5610536516909969	-5.604	ENSG00000184863	RBM33	GBA_Control_v_Control	0.24683059634986382	-0.491225	0.6359057324718492	0.525004	0.9210556552849787	-5.3251
1:117402185-117405645:+	-0.197635	-2.81259	-0.832741	0.40521317410704616	0.5709204941535195	-5.6055	ENSG00000198162	MAN1A2	GBA_Control_v_Control	0.3615498429191626	2.3833072861367097	0.764583	0.44472635523464443	0.8946831700325871	-5.28524
7:158869854-158876691:+	0.21760333522551134	-1.03981	1.0145889292565338	0.3105759214901063	0.4832780094364119	-5.60719	ENSG00000126870	WDR60	GBA_Control_v_Control	-0.0931551	-0.182237	-0.393129	0.6943197000020178	0.9631176654860899	-5.42727
6:3410187-3415855:-	-0.184616	-3.06992	-0.815749	0.4148605354912349	0.5804590325748196	-5.60722	ENSG00000137266	SLC22A23	GBA_Control_v_Control	-0.299414	-1.18232	-0.848247	0.3965325197483157	0.8827087649054147	-5.20556
11:34086063-34092056:+	0.1439110004752331	-1.96118	0.9139902585663853	0.3609680367720456	0.5311703187907665	-5.60963	ENSG00000135387	CAPRIN1	GBA_Control_v_Control	0.26261375034778656	-4.31557	0.517369	0.6050310100717031	0.937919	-5.51089
16:68121986-68126610:+	-0.139277	1.2335398631702579	-1.18058	0.23808261357322774	0.4075238062210629	-5.61093	ENSG00000072736,ENSG00000261864	NFATC3,AC130462.3	GBA_Control_v_Control	0.3987325047514032	-2.51224	0.6776715262640449	0.49815914791161386	0.9102302281357044	-5.32169
14:31127784-31133675:-	-0.174059	-2.39777	-0.863842	0.38790600717755686	0.5542929242988237	-5.6124	ENSG00000092148	HECTD1	GBA_Control_v_Control	0.3814578090656866	0.1780890687843802	0.6042545439852602	0.5458310762409493	0.9210556552849787	-5.35474
6:41933549-41933881:-	-0.183567	-2.45427	-0.849846	0.39563791693382633	0.5596260004480997	-5.61503	NA	NA	GBA_Control_v_Control	0.12686954335856182	0.6719486797680412	0.33760053217927877	0.7357452215954282	0.9681161654065235	-5.45691
17:1842802-1844686:+	-0.250852	-2.15477	-0.879127	0.3795710252337683	0.5470384131909846	-5.61748	ENSG00000132383	RPA1	GBA_Control_v_Control	0.26088918593041943	1.2105446704839118	0.611064	0.5413160349008379	0.9210556552849787	-5.35634
12:30710447-30753559:-	0.17320134771411944	-3.06589	0.8029163359859639	0.4222361856806107	0.5864770915406564	-5.62122	ENSG00000110888	CAPRIN2	GBA_Control_v_Control	0.44333500727320185	-2.53496	0.8520713170464247	0.39440768352777733	0.8827087649054147	-5.23521
3:149846010-149921227:+	-0.171258	-2.12457	-0.872806	0.38300309212668937	0.5500959723530465	-5.6224	ENSG00000082996	RNF13	GBA_Control_v_Control	2.7447696767052037	-1.8715	3.3321794972444136	8.978191126554527e-4	0.269094	-0.878992
10:101792838-101810314:-	-0.152084	-1.78663	-0.901923	0.3673405834149569	0.5367840204993147	-5.62373	ENSG00000198408	OGA	GBA_Control_v_Control	-0.491347	4.232472822038537	-1.09389	0.27430346699619695	0.84418	-5.06533
10:5959753-5960567:-	-0.228133	-2.77406	-0.804791	0.42115521926592236	0.5864770915406564	-5.63198	ENSG00000134470	IL15RA	GBA_Control_v_Control	-0.1667	-0.515003	-0.419716	0.6747957382129104	0.9579118935070294	-5.41863
19:14402596-14404562:+	-0.158092	-1.8838	-0.865686	0.38689454856757666	0.5537570474830888	-5.63296	ENSG00000123146	ADGRE5	GBA_Control_v_Control	-0.0382176	4.982930646758392	-0.102345	0.9185066480792166	0.9885407591470613	-5.57762
2:202952558-202955758:+	-0.204851	-2.64595	-0.802505	0.42247385609285504	0.5864770915406564	-5.63488	ENSG00000138380	CARF	GBA_Control_v_Control	-0.360588	-0.0961167	-0.808467	0.41904150418455066	0.8870740761251853	-5.22156
7:22976209-22984045:-	-0.2209	-2.94903	-0.781944	0.4344551882953722	0.5949838997943964	-5.63571	ENSG00000122591	FAM126A	GBA_Control_v_Control	0.013479936163465212	0.7264997324536779	0.022038292617308837	0.9824224349091971	0.9971506702600866	-5.50517
15:32523028-32533368:-	-0.288805	-1.62396	-0.906008	0.3651807552675862	0.5347210948224626	-5.63811	ENSG00000223509	AC135983.3	GBA_Control_v_Control	-0.111496	0.7933860624121093	-0.223685	0.823055	0.9821086447545352	-5.48597
12:64648536-64649552:+	-0.473459	-1.1808	-0.971242	0.33169704625908825	0.5003250958962077	-5.63946	ENSG00000153179	RASSF3	GBA_Control_v_Control	-0.42301	-0.183144	-0.725308	0.4684568240223502	0.8996202637244488	-5.27789
1:180984676-180993425:-	-0.168464	-1.47379	-0.908617	0.3637968125426375	0.5342908976347123	-5.63974	ENSG00000135823	STX6	GBA_Control_v_Control	0.878265	2.0391528400824668	1.796677831302364	0.0727316	0.65654	-4.17315
22:29970975-29979052:+	-0.160803	-2.80597	-0.77782	0.4368803581936975	0.5978175398591835	-5.63999	ENSG00000100330	MTMR3	GBA_Control_v_Control	0.28459971034774156	-1.22203	0.3914537975544176	0.6955571511768631	0.9631176654860899	-5.44379
X:53403565-53403893:-	0.2755674367251837	-1.43986	0.9479195373351517	0.34343123539669795	0.512654	-5.64148	ENSG00000072501	SMC1A	GBA_Control_v_Control	0.44156073004998164	1.3731689791203305	1.351594505040408	0.17685436741801575	0.7960817235786821	-4.75541
17:39709812-39715939:+	0.1983097935350382	-0.619446	0.9906455635451052	0.3221263331313183	0.4916819212068031	-5.64295	ENSG00000141736	ERBB2	GBA_Control_v_Control	0.20574058598964418	-0.557158	1.0986312653921257	0.2722310208346544	0.84418	-4.98943
18:57571391-57580199:-	-0.169263	-2.08431	-0.859992	0.390024	0.5544856866968301	-5.64298	ENSG00000066926	FECH	GBA_Control_v_Control	0.4186312448194718	4.02867	0.9250287967034663	0.35520599410352627	0.8699886924736928	-5.21213
1:172551511-172591071:+	-0.163599	-3.22845	-0.757247	0.4491011753338201	0.6090798654163845	-5.64366	ENSG00000094975	SUCO	GBA_Control_v_Control	0.6874578342993103	-2.85201	1.13118	0.2582899632405537	0.842534	-4.98847
3:197865422-197866219:+	-0.178634	-2.95936	-0.775251	0.4383962926391044	0.5989156837600133	-5.64378	ENSG00000186001	LRCH3	GBA_Control_v_Control	2.106551487698809	-1.29831	3.4328303954886996	6.253414582730041e-4	0.269094	-0.588015
16:8915253-8917156:-	-0.22606	-2.44412	-0.818635	0.41321394477181006	0.5791203783571528	-5.64413	ENSG00000187555	USP7	GBA_Control_v_Control	0.0389163	0.0838908	0.057879809950271185	0.953858	0.9951955291565148	-5.5033
2:168691033-168717978:+	-0.138957	-2.29749	-0.812353	0.41680482672937125	0.5826938418639587	-5.64456	ENSG00000172292	CERS6	GBA_Control_v_Control	0.4133446194100783	1.6666963685691416	1.483493671886021	0.13830327885811494	0.7663736145306105	-4.59505
11:85996825-86001158:-	-0.165317	-2.59499	-0.793253	0.42784072579958465	0.5901906256361631	-5.64467	ENSG00000073921	PICALM	GBA_Control_v_Control	-0.624143	2.5674207696167546	-0.821805	0.41141183232040834	0.8827087649054147	-5.25667
13:95161188-95188542:-	-0.195497	-0.534895	-1.01798	0.3089605134781197	0.4825532112835004	-5.64547	ENSG00000125257	ABCC4	GBA_Control_v_Control	0.271069	-5.18575	1.0341749743922253	0.3014209123100801	0.8553046509813077	-5.22519
2:112299848-112332282:+	-0.156536	-3.19516	-0.752888	0.45171520154306044	0.6106520317156188	-5.64644	ENSG00000188177	ZC3H6	GBA_Control_v_Control	-0.471917	-0.175753	-1.06628	0.28659080583587593	0.8441858999972556	-5.03597
1:103565434-103575540:+	0.21183727483794712	-2.42464	0.8026781179013903	0.42237449468312727	0.5864770915406564	-5.64728	ENSG00000240038,ENSG00000236085	AMY2B,ACTG1P4	GBA_Control_v_Control	0.7229897154822345	0.3769952083861361	1.6709159392386268	0.0950959	0.6963735360482091	-4.33234
2:171540807-171541793:+	-0.250859	-2.69992	-0.784714	0.43283223727474096	0.5944356196384634	-5.6476	ENSG00000071967	CYBRD1	GBA_Control_v_Control	-0.117976	-1.11352	-0.224157	0.8226872673295187	0.9821086447545352	-5.48944
1:155921374-155923687:-	-0.162675	-3.00261	-0.760411	0.447209	0.6070041365414721	-5.64818	ENSG00000132680	KHDC4	GBA_Control_v_Control	-0.772442	-0.0149714	-1.94386	0.052233161048473434	0.648659	-3.92211
1:15638306-15643650:+	-0.181886	-0.613934	-1.00034	0.3174150940709665	0.48736390414431796	-5.64836	ENSG00000197312	DDI2	GBA_Control_v_Control	0.9617229846271309	-1.01085	1.6201147839500767	0.10556797350620374	0.730176	-4.41735
3:71684571-71710484:-	-0.171052	-2.48184	-0.791414	0.4289122416060379	0.59076591768378806	-5.6495	ENSG00000285708,ENSG00000163412	AC097634.4,EIF4E3	GBA_Control_v_Control	0.29330623693692637	2.835756871990936	0.6087764811651335	0.5428306307227313	0.9210556552849787	-5.3904
11:61366044-61367998:+	-0.218086	1.0761577506778222	-1.13104	0.2583421704726855	0.43012163209523135	-5.65142	ENSG00000149483	TMEM138	GBA_Control_v_Control	0.7548723300128402	-0.54355	1.6996733515978484	0.0895478	0.6963735360482091	-4.28962
16:30728965-30729572:+	0.2168306105490052	-2.77586	0.7717742229268619	0.4404527180748995	0.5997730037694698	-5.65336	ENSG00000282034,ENSG00000080603	AC106886.6,SRCAP	GBA_Control_v_Control	0.5980072137636403	-1.26716	1.5518079644746692	0.12106981698906172	0.7357016639037067	-4.49062
8:38347496-38348215:-	-0.149932	-2.18696	-0.824269	0.4100062398879538	0.5760673445789745	-5.65461	ENSG00000147548	NSD3	GBA_Control_v_Control	0.0734496	2.4520198288678903	0.2123925991599653	0.8318502312908732	0.9821086447545352	-5.52313
19:15397149-15404042:-	-0.165055	-2.59247	-0.786588	0.4317313973761461	0.5941614886840567	-5.65786	ENSG00000011243	AKAP8L	GBA_Control_v_Control	0.35333879715897165	2.0024008688903456	0.7229509150297748	0.46990325594083804	0.8996202637244488	-5.31931
10:74838682-74843478:+	-0.155914	-3.09818	-0.742713	0.4578503168737247	0.6154769271665202	-5.65827	ENSG00000156650	KAT6B	GBA_Control_v_Control	0.10694221646834556	1.0738947733651436	0.2033645898406088	0.8388973625743159	0.9821086447545352	-5.49302
5:138810037-138827718:+	-0.157384	-2.99881	-0.749142	0.4539681099990607	0.6117274933293924	-5.66029	ENSG00000044115	CTNNA1	GBA_Control_v_Control	-0.047915	1.6694788043468531	-0.0784115	0.9375186812800833	0.9915398309595024	-5.52056
8:21974669-21987857:+	-0.195035	-1.20855	-0.947175	0.3438049774078621	0.512654	-5.66314	ENSG00000130227	XPO7	GBA_Control_v_Control	-0.0509015	1.755221587224024	-0.117447	0.9065327745198004	0.9864345615157127	-5.52271
11:85974707-86031611:-	-0.140187	-2.10221	-0.832546	0.4053229476063105	0.5709204941535195	-5.66376	ENSG00000073921	PICALM	GBA_Control_v_Control	0.30267588520698646	4.3144283699974775	0.42485531107956837	0.6710466161488402	0.9579118935070294	-5.50444
15:65715477-65738875:-	-0.15601	-1.49634	-0.898337	0.369247	0.5372324194328476	-5.66411	ENSG00000264737,ENSG00000174485	MIR4511,DENND4A	GBA_Control_v_Control	0.2814529684652163	-3.66651	0.4971405499949426	0.619215	0.937919	-5.50902
12:53027781-53028188:+	-0.186152	-3.26465	-0.716942	0.47359667806595507	0.6315876270633348	-5.66723	ENSG00000063046	EIF4B	GBA_Control_v_Control	-0.662381	3.2462463910212933	-0.709061	0.4784758162632119	0.8996202637244488	-5.3373
1:20744743-20780540:-	-0.160674	-2.20095	-0.816937	0.4141816621535547	0.5799925027154448	-5.66927	ENSG00000127483	HP1BP3	GBA_Control_v_Control	-0.517156	2.6195546043589952	-0.787151	0.43140660573750966	0.8914236720134187	-5.27447
8:123077110-123105464:+	-0.144439	-0.344362	-0.999466	0.3178392416627911	0.48736390414431796	-5.6693	ENSG00000156787	TBC1D31	GBA_Control_v_Control	0.21407276342391723	-0.0384318	0.4944329490993018	0.6211245708143404	0.937919	-5.39323
12:111679150-111683307:-	-0.15777	-2.32303	-0.797314	0.4254802781340947	0.58842	-5.67062	ENSG00000089234	BRAP	GBA_Control_v_Control	0.459242	0.2523274658031748	0.80101172402185294	0.42334232910061564	0.8893667059099377	-5.23224
1:225412453-225415332:-	-0.170154	-2.97947	-0.722605	0.4701116044385306	0.6279374573208377	-5.67224	ENSG00000143815	LBR	GBA_Control_v_Control	0.4525408641279789	1.873805752740938	0.5439881532270373	0.5865882206360796	0.937919	-5.40713
10:86451966-86461287:-	-0.150386	-2.85119	-0.734539	0.46281261476439994	0.6206568531864437	-5.67228	ENSG00000062650	WAPL	GBA_Control_v_Control	0.0451289	0.10145351914941914	0.0713782	0.943113	0.9934045250248417	-5.50884
7:39987598-40002031:+	-0.165223	-2.93727	-0.736811	0.4614304250200606	0.6192979085600974	-5.67339	ENSG00000065883	CDK13	GBA_Control_v_Control	0.9110364234510233	1.1683515452954494	1.5573566935256125	0.119747	0.7357016639037067	-4.49293
20:49074784-49091022:+	-0.151493	-2.6846	-0.745034	0.4564464927839721	0.6140814594425393	-5.67346	ENSG00000124207	CSE1L	GBA_Control_v_Control	0.8789102711928383	-1.56447	1.7445108288072007	0.0814212	0.6801303462911467	-4.23167
17:8238030-8238629:-	-0.146186	-2.56011	-0.75346	0.45137173585658785	0.6106520317156188	-5.67423	ENSG00000178971	CTC1	GBA_Control_v_Control	0.0809049	1.562542762782931	0.21123423464030094	0.8327536893739519	0.9821086447545352	-5.5019
19:45263112-45263367:+	-0.222678	-2.08138	-0.797225	0.4255337577746646	0.58842	-5.67644	ENSG00000007047	MARK4	GBA_Control_v_Control	-0.244797	-1.54289	-0.876742	0.3808675274199005	0.8823077098619806	-5.17393
15:92924320-92929091:+	0.16313850329223945	-0.0688813	1.0181323116142489	0.3088901254360955	0.4825532112835004	-5.67657	ENSG00000279765,ENSG00000173575	AC013394.1,CHD2	GBA_Control_v_Control	0.7485141081860343	-0.952977	0.8715175198204858	0.38371072820349295	0.8823077098619806	-5.18927
17:60265411-60271481:-	-0.166517	-2.62663	-0.750851	0.4529393302436917	0.6113224561729569	-5.67737	ENSG00000170832	USP32	GBA_Control_v_Control	0.7517613630507025	-0.813327	0.9391225865893749	0.34792699889541556	0.8638512846383748	-5.13892
2:226864603-226908878:+	-0.150267	-2.13875	-0.801928	0.4228076324901704	0.5864770915406564	-5.67981	ENSG00000144468	RHBDD1	GBA_Control_v_Control	-0.726842	2.059475241731373	-1.67326	0.0946329	0.6963735360482091	-4.34804
19:45277922-45278615:+	-0.156908	-3.20782	-0.697257	0.4858230454993485	0.6407673946531077	-5.68007	ENSG00000007047	MARK4	GBA_Control_v_Control	0.10333461060286098	-1.54661	0.2852784467918227	0.775498	0.9821086447545352	-5.49278
10:96944112-96952196:+	0.14737936061555912	-1.02617	0.9339858070710866	0.35056303555241186	0.5197938585356088	-5.68124	ENSG00000196233	LCOR	GBA_Control_v_Control	-0.308485	-0.821799	-0.67673	0.49875628938942707	0.9102302281357044	-5.30251
1:15638306-15651895:+	-0.145348	-1.50753	-0.866938	0.3862083750201515	0.5532797454426914	-5.68342	ENSG00000197312	DDI2	GBA_Control_v_Control	-0.721805	-0.905765	-1.28162	0.20031516335362276	0.802695	-4.87339
1:25340473-25356853:+	-0.221365	-2.18249	-0.776263	0.43780090493624957	0.5985893480358006	-5.68358	ENSG00000183726	TMEM50A	GBA_Control_v_Control	0.1143582341540123	1.1281887447830248	0.12385551142544608	0.9014581264242542	0.9847541920343826	-5.52252
3:172755482-172756503:+	-0.161169	-3.04654	-0.703961	0.48163987138190667	0.6377550031941809	-5.68456	ENSG00000114346	ECT2	GBA_Control_v_Control	-0.471348	-2.22892	-1.66544	0.0961827	0.6990944509553318	-4.36807
2:8770669-8776892:-	-0.159793	-1.00602	-0.905788	0.3652918974159408	0.5347210948224626	-5.68473	ENSG00000134313	KIDINS220	GBA_Control_v_Control	-0.219911	2.8872909071192363	-0.618946	0.5361131408636206	0.9210556552849787	-5.39667
16:71663898-71679535:-	-0.154691	-3.07712	-0.702056	0.48282701744085954	0.6385957378681358	-5.68583	ENSG00000040199	PHLPP2	GBA_Control_v_Control	0.2282441558763355	0.590743	0.4526769654118921	0.6508935947312683	0.9529980119380987	-5.41715
X:148661907-148662768:+	-0.165426	0.7877941285037142	-1.07738	0.28160158294360793	0.4563793993844765	-5.68905	ENSG00000155966	AFF2	GBA_Control_v_Control	-0.387541	-0.85579	-2.10176	0.0358595	0.6278743191681722	-3.65396
22:42411406-42411736:-	-0.183751	-2.95847	-0.684803	0.49364592020659626	0.6476576751432795	-5.69734	ENSG00000235568	NFAM1	GBA_Control_v_Control	-0.925311	0.40878740419462384	-1.7839	0.0747867	0.6675788786005744	-4.16968
12:112319224-112319742:-	-0.145196	-2.96458	-0.697994	0.48536188227648924	0.6406624216526929	-5.69739	ENSG00000173064	HECTD4	GBA_Control_v_Control	-0.284164	1.126977523972586	-0.529522	0.5965778289507304	0.937919	-5.3977
20:43702489-43705358:+	0.17661973085846583	-0.880327	0.9342221705714433	0.3504411904534157	0.5197938585356088	-5.69947	ENSG00000101057	MYBL2	GBA_Control_v_Control	-0.145596	-2.86688	-0.692197	0.4889972528019333	0.9082150303699623	-5.33403
15:92937517-92956649:+	-0.1498	-3.3401	-0.662782	0.507641	0.6596974757357643	-5.70089	ENSG00000279765,ENSG00000173575	AC013394.1,CHD2	GBA_Control_v_Control	-0.532119	-1.9754	-0.791179	0.4290539779440107	0.8914236720134187	-5.26171
22:45793544-45807022:+	-0.127999	-2.07642	-0.751372	0.4526263477140372	0.6113224561729569	-5.70251	ENSG00000130638	ATXN10	GBA_Control_v_Control	0.36038810623220163	0.5880804252467141	1.4189694049700339	0.15626390142280872	0.7871086807533572	-4.65891
9:96458378-96471094:+	-0.146408	-2.43912	-0.720332	0.47150890756802877	0.6293032240117014	-5.70549	ENSG00000130956	HABP4	GBA_Control_v_Control	0.21052223334823328	0.3984189959845849	0.6044061312308106	0.5457303508932094	0.9210556552849787	-5.34669
7:30550635-30574881:-	-0.172266	-1.16766	-0.892998	0.3720981848559405	0.5401477913255768	-5.70579	ENSG00000281039,ENSG00000196295	AC005154.5,GARS1-DT	GBA_Control_v_Control	0.43403832187104485	-0.163887	0.5761460796733442	0.5646646223469038	0.9311180152179122	-5.35801
3:9750944-9751949:+	0.16789437034254717	-3.31858	0.654648	0.5128628005716281	0.6644264214195708	-5.70633	ENSG00000114026	OGG1	GBA_Control_v_Control	0.3168196457478236	-0.315051	0.6071737372871285	0.5438931586271332	0.9210556552849787	-5.34379
18:2890560-2892486:+	-0.189297	-1.82609	-0.797022	0.4256497109161852	0.58842	-5.70715	ENSG00000132205	EMILIN2	GBA_Control_v_Control	-0.154125	2.351175043915306	-0.428001	0.6687558310045483	0.9579118935070294	-5.46814
12:56169528-56170208:-	-0.153292	-1.73038	-0.804448	0.42135166892314535	0.5864770915406564	-5.70738	ENSG00000258199,ENSG00000139613	AC073896.4,SMARCC2	GBA_Control_v_Control	-0.182054	0.558173	-0.607581	0.5436229174531593	0.9210556552849787	-5.34682
1:168038370-168068463:+	-0.134688	-2.85664	-0.680136	0.49659436980253735	0.6503759336181437	-5.71129	ENSG00000143164	DCAF6	GBA_Control_v_Control	0.324456	-4.70423	0.7871919583611218	0.43140804256419285	0.8914236720134187	-5.3754
14:45246742-45247377:-	-0.188759	-3.03468	-0.674964	0.4998738476732665	0.652128	-5.71222	ENSG00000129534	MIS18BP1	GBA_Control_v_Control	1.2139883146678292	0.3970559659407249	1.9643162705277508	0.049809624407948123	0.6433104567764992	-3.89062
1:205616477-205623891:-	-0.224075	0.6079843144140332	-1.04514	0.2962440817249272	0.47101686857590225	-5.71273	ENSG00000158711	ELK4	GBA_Control_v_Control	0.4649479051275015	1.486051111570792	1.1198857925800167	0.2630697662780487	0.84418	-4.99391
11:76463820-76472840:+	-0.136154	-1.90508	-0.792734	0.4281430506401708	0.5901906256361631	-5.71345	ENSG00000158636	EMSY	GBA_Control_v_Control	0.097189	1.295054502189101	0.3387014487329277	0.7349158854615556	0.9681161654065235	-5.47033
17:80891719-80893865:+	0.13795862419844607	-2.3133	0.7243406676701424	0.4690458514818737	0.627013	-5.71787	ENSG00000141564	RPTOR	GBA_Control_v_Control	-0.202334	-0.599746	-0.738666	0.46030807903167636	0.8992031284658809	-5.26445
1:169978084-170031975:-	0.14344445513345752	-2.4112	0.7013519256373877	0.4832656701917437	0.6385957378681358	-5.71844	ENSG00000075945	KIFAP3	GBA_Control_v_Control	0.3924092635041858	1.2284403749778114	1.059822443786953	0.28951787675858814	0.8463996107562392	-5.03894
4:53414614-53444103:+	0.13078226246235383	-2.71845	0.6757065255442269	0.49940148062970524	0.6520179517708204	-5.72278	ENSG00000282278,ENSG00000145216	AC058822.1,FIP1L1	GBA_Control_v_Control	-0.203556	2.2758940037663655	-0.501552	0.6161091985418183	0.937919	-5.43376
15:58886974-58887540:-	0.1816843155651331	-2.65901	0.6768916836851114	0.49865018813410333	0.6515437088538206	-5.72707	ENSG00000137776	SLTM	GBA_Control_v_Control	0.38100182078395006	1.9133325075990881	0.6334433163933925	0.5266097340853519	0.9210556552849787	-5.36527
8:60741258-60743097:+	0.11922320376077167	-2.48856	0.691202	0.48961770487256373	0.6442540176183656	-5.72752	ENSG00000171316	CHD7	GBA_Control_v_Control	-0.00292905	1.616447266663044	-0.00925125	0.9926207867855228	0.9990718280437094	-5.52676
4:25127263-25159107:-	-0.123788	-1.66037	-0.785663	0.43227285628660805	0.5944194313720025	-5.72778	ENSG00000109618	SEPSECS	GBA_Control_v_Control	-0.0628425	0.1290412715184635	-0.384136	0.700971	0.9631176654860899	-5.43249
8:11808793-11838573:+	-0.136182	-2.70233	-0.66591	0.5056403645057821	0.6581164124071381	-5.7283	ENSG00000079459	FDFT1	GBA_Control_v_Control	-0.0859555	2.394372804957049	-0.155563	0.8764133541681765	0.9826798758222193	-5.52588
11:47358843-47360040:-	0.12753797195134453	-2.13521	0.7067361966224243	0.47991431920263816	0.6374811249535044	-5.73261	ENSG00000066336	SPI1	GBA_Control_v_Control	0.0565818	1.8912894001680662	0.19970035558677895	0.8417613212560964	0.9821086447545352	-5.51083
16:304303-314683:-	-0.122816	-2.28658	-0.677004	0.49857860022665035	0.6515437088538206	-5.7331	ENSG00000103126	AXIN1	GBA_Control_v_Control	-0.000681624	1.3507852181174318	-0.00237288	0.9981072563955375	0.9992976049422226	-5.51354
14:78957241-78988141:+	-0.191052	-1.39092	-0.838869	0.40176715607495106	0.5668630714704562	-5.7335	ENSG00000021645	NRXN3	GBA_Control_v_Control	0.2208966470667466	-3.48051	0.9560441552905874	0.3393138826761899	0.8605768339808534	-5.16278
20:44479984-44490111:+	0.1457011237222906	-2.34129	0.7047829945997928	0.48112858823547855	0.6377550031941809	-5.73468	ENSG00000124120	TTPAL	GBA_Control_v_Control	-0.077881	-0.74851	-0.133209	0.8940584345741356	0.9839569195536666	-5.49216
4:82930942-82946474:-	-0.138229	-2.80377	-0.640491	0.5220170654462568	0.6723635603609407	-5.73576	ENSG00000189308,ENSG00000199530	LIN54,Y_RNA	GBA_Control_v_Control	0.6538586652549649	-1.5115	1.1615832411240299	0.2457215883253635	0.8368489793068669	-4.93323
16:533945-536142:+	0.14990627221623765	-2.56001	0.6597983231165642	0.5095529486267514	0.6613851295392307	-5.73624	ENSG00000103326,ENSG00000266124	CAPN15,MIR5587	GBA_Control_v_Control	0.0974179	-0.334726	0.28002372112034835	0.7795254924294022	0.9821086447545352	-5.45893
17:7344538-7345779:+	-0.136167	-2.88871	-0.627286	0.5306320424951774	0.6816612083775079	-5.7393	ENSG00000072818	ACAP1	GBA_Control_v_Control	0.15374427312685146	1.8604452883431175	0.2817562674732385	0.7781970356552609	0.9821086447545352	-5.49392
10:72715110-72715902:+	-0.197077	-1.58788	-0.768862	0.44217894527356405	0.6011485417929668	-5.7406	ENSG00000156026	MCU	GBA_Control_v_Control	0.5178128172957495	0.9201321204292056	1.4059240901234649	0.1601016996670304	0.7871086807533572	-4.67889
21:44855209-44861271:-	-0.173551	0.835552	-1.02215	0.30698750315612855	0.48126238823449097	-5.7419	ENSG00000183255	PTTG1IP	GBA_Control_v_Control	-0.0747968	4.946941546176405	-0.238751	0.8113544276269411	0.9821086447545352	-5.56339
11:16111802-16186955:-	0.1311006624338118	-1.99715	0.7374058448544919	0.4610687898666973	0.6192979085600974	-5.74249	ENSG00000110693	SOX6	GBA_Control_v_Control	-0.128083	-5.12758	-0.644242	0.5195940388958971	0.9210556552849787	-5.51684
3:121449314-121487509:-	-0.130782	-2.9733	-0.62146	0.5344554465242684	0.685524	-5.74295	ENSG00000051341	POLQ	GBA_Control_v_Control	-0.182128	-3.19743	-0.709959	0.47791864558330954	0.8996202637244488	-5.36679
17:42500706-42501304:+	-0.161298	0.2704508900010784	-0.964104	0.33525431351572765	0.5039319537984841	-5.74411	ENSG00000033627	ATP6V0A1	GBA_Control_v_Control	-0.528502	2.2918942739193513	-2.36412	0.018290453449395574	0.5181226712443692	-3.17548
3:123931101-123949132:-	-0.166484	-1.24703	-0.83161	0.40585099465854435	0.5711850964222095	-5.74455	ENSG00000175455	CCDC14	GBA_Control_v_Control	1.055366630399167	0.13131049313463944	2.023381742171652	0.0433374	0.641135	-3.7913
22:26457858-26458577:-	-0.150283	-1.30809	-0.796629	0.4258777506279159	0.58842	-5.74497	ENSG00000100099	HPS4	GBA_Control_v_Control	0.1509002482416899	0.6529847720521581	0.828924	0.40737341890172274	0.8827087649054147	-5.21253
21:42994847-42995343:+	-0.210525	-1.55854	-0.774585	0.43879155600769437	0.5989683110056251	-5.74559	ENSG00000160199	PKNOX1	GBA_Control_v_Control	0.2716874769904094	-1.85729	1.0965533585694742	0.27313826483014575	0.84418	-4.99913
X:77652113-77656653:-	0.14025579947412764	-1.81268	0.7458433546376878	0.4559578202132806	0.6139159423721717	-5.74728	ENSG00000085224	ATRX	GBA_Control_v_Control	0.33777961096846276	1.5523752524173575	0.7186584127935385	0.4725432930031599	0.8996202637244488	-5.30908
7:32632542-32679130:-	-0.146389	-1.35387	-0.806389	0.42023283397848576	0.5864770915406564	-5.74793	ENSG00000229358	DPY19L1P1	GBA_Control_v_Control	-0.0893918	-5.35383	-0.583131	0.5600296259880577	0.9283558963272281	-5.55566
4:53425871-53428183:+	-0.111708	-1.21926	-0.806637	0.42008969236868066	0.5864770915406564	-5.75123	ENSG00000282278,ENSG00000145216	AC058822.1,FIP1L1	GBA_Control_v_Control	0.33435499645310074	-5.15527	0.9542009859832647	0.34041131523755064	0.8605768339808534	-5.2568
16:69370482-69372355:-	0.24758928413299586	-1.56682	0.7961549556001494	0.4261576678627844	0.58842	-5.75139	ENSG00000132604	TERF2	GBA_Control_v_Control	0.5767315985864372	0.12918218046461033	2.013665430594543	0.0443503	0.641135	-3.80504
8:140585118-140585311:-	-0.128353	-3.12525	-0.585846	0.5581266202135102	0.7088461386826654	-5.75214	ENSG00000123908	AGO2	GBA_Control_v_Control	-0.0489151	-5.06815	-0.118441	0.9057606865698791	0.9864345615157127	-5.68164
9:19423861-19435084:+	-0.139341	-2.43129	-0.6417	0.5212323043265696	0.6721574800033107	-5.75276	ENSG00000177076	ACER2	GBA_Control_v_Control	0.00896028	-1.52778	0.0311857	0.975129	0.996674	-5.5049
16:67036638-67082339:+	0.11533047864294055	-2.93666	0.5876771546687202	0.556897	0.7083563627216721	-5.75306	ENSG00000067955	CBFB	GBA_Control_v_Control	0.6177911205190121	1.2466588090583997	0.9311197213013219	0.3520484911167998	0.8654310638142122	-5.15373
3:170171372-170178938:-	-0.122619	-2.14848	-0.684641	0.4937473640163179	0.6476576751432795	-5.75384	ENSG00000173889	PHC3	GBA_Control_v_Control	0.0808245	2.8024069065417043	0.22411163639146828	0.8227227616018493	0.9821086447545352	-5.53238
5:172052928-172061268:-	0.1179780077403434	-2.98126	0.5877143507072349	0.5568722398848797	0.7083563627216721	-5.75522	ENSG00000072786	STK10	GBA_Control_v_Control	0.7801948209799399	2.397064629872933	1.3965469857998392	0.1629040151664266	0.7871086807533572	-4.7117
3:47037665-47067118:-	0.1225376653065341	-2.58177	0.6479642295196798	0.5171742159912689	0.6674369782085631	-5.75552	ENSG00000181555	SETD2	GBA_Control_v_Control	0.541093	-0.0366722	1.1513383549960778	0.2499076029304514	0.842534	-4.94337
3:53497151-53501720:+	-0.121033	-2.38648	-0.652721	0.5141035107944827	0.6652865514800586	-5.75598	ENSG00000157388	CACNA1D	GBA_Control_v_Control	-0.264898	-3.07159	-1.18604	0.2359292241965556	0.8307451706813072	-4.95551
19:34327420-34330347:+	-0.134328	-2.96859	-0.595689	0.5515338795713007	0.7025989254933338	-5.75611	ENSG00000166398	GARRE1	GBA_Control_v_Control	-0.733144	0.586372	-1.59191	0.11176614653371066	0.730176	-4.44437
2:61482379-61490776:-	-0.165112	-2.21653	-0.673149	0.5010263216428753	0.6526169077101533	-5.75618	ENSG00000082898	XPO1	GBA_Control_v_Control	0.36770273184390767	-1.07076	0.530814	0.5956822166636438	0.937919	-5.41093
8:21974669-21977843:+	-0.135787	-2.0684	-0.709568	0.4781570249231003	0.6361534428255827	-5.76099	ENSG00000130227	XPO7	GBA_Control_v_Control	0.16250678158704304	-4.53873	0.37525597181711495	0.7075661061634527	0.9633841297999743	-5.58754
12:120782654-120784593:-	-0.351479	0.0662585	-0.885099	0.3763475786441952	0.5442614853950076	-5.76332	ENSG00000157837	SPPL3	GBA_Control_v_Control	0.3889073768240898	1.3877564144595915	1.4256319959069785	0.15433109506317336	0.786634	-4.65977
16:88608933-88611536:+	0.17075479331563792	-1.40914	0.7728021493586075	0.43984344759280314	0.5994295036593478	-5.76425	ENSG00000158545	ZC3H18	GBA_Control_v_Control	-0.0999887	-0.166365	-0.357457	0.7208358402257753	0.9670804091739919	-5.44154
9:4860124-4860901:+	-0.160663	1.3273819314056854	-1.04597	0.29585822725168637	0.47101686857590225	-5.76485	ENSG00000120158	RCL1	GBA_Control_v_Control	0.839226	-2.66297	1.6004591611326258	0.10985776315523937	0.730176	-4.44644
22:31282293-31283288:-	-0.125583	-3.15152	-0.55761	0.5772502579831285	0.7265391178063513	-5.76536	ENSG00000100100	PIK3IP1	GBA_Control_v_Control	0.3184619040061598	3.091122508474964	0.43821514981300125	0.6613385013485791	0.9579118935070294	-5.45811
1:1804418-1806538:-	0.11542431478514459	-2.95982	0.5662515895779836	0.571365	0.7226262859733382	-5.76595	ENSG00000078369	GNB1	GBA_Control_v_Control	-0.315546	2.451526365781731	-0.510911	0.6095425268152447	0.937919	-5.42118
12:123586746-123590449:+	-0.153865	-0.354413	-0.892778	0.3722161968812938	0.5401477913255768	-5.77031	ENSG00000086598	TMED2	GBA_Control_v_Control	-0.229715	4.629070931618902	-1.50696	0.13218270122436393	0.7574565029205018	-4.60777
11:65435052-65444063:+	0.11803256765811465	-3.05954	0.5543853912261523	0.5794535717949643	0.7276710588484638	-5.77118	ENSG00000245532	NEAT1	GBA_Control_v_Control	0.5691606355397831	-4.30282	1.1283076622837698	0.25950654508248294	0.842534	-5.08177
20:58999342-58999809:-	0.11519563123692489	-3.15738	0.5467692782681278	0.5846734942577678	0.7320408626836631	-5.77159	ENSG00000101160	CTSZ	GBA_Control_v_Control	0.1962066585158233	-1.13791	0.5831451445581873	0.5599458587188566	0.9283558963272281	-5.37203
14:49664625-49665163:-	-0.152382	-1.79691	-0.705633	0.4805996597359925	0.6377550031941809	-5.77177	ENSG00000100479	POLE2	GBA_Control_v_Control	0.6508734606985727	-1.16599	1.6587038421164209	0.0975339	0.7013155416861646	-4.34473
20:63202286-63203807:-	-0.121389	-3.26781	-0.540206	0.5891890832848365	0.7333198449482881	-5.77181	ENSG00000149658	YTHDF1	GBA_Control_v_Control	-0.706193	0.5852634006310021	-1.28982	0.19745225915750425	0.8007786065832116	-4.80823
1:155438326-155459898:-	-0.112945	-0.241568	-0.90815	0.36404335133657584	0.5342908976347123	-5.77223	ENSG00000116539	ASH1L	GBA_Control_v_Control	0.39862367361261075	-0.102897	0.8037351428889069	0.4217682666233943	0.8888546826182961	-5.22434
4:38826684-38829537:-	-0.114421	-2.5122	-0.61123	0.5412022102102654	0.6925903284626795	-5.77274	ENSG00000174125,ENSG00000174130	TLR1,TLR6	GBA_Control_v_Control	0.4466386125478601	3.903232465284729	0.9759442162178895	0.3293618707629592	0.8605768339808534	-5.16439
9:127444028-127445249:+	-0.200048	-0.896406	-0.821046	0.4118404200543414	0.5776775816802333	-5.77311	ENSG00000196152	ZNF79	GBA_Control_v_Control	-0.0909509	1.1020579549734892	-0.325911	0.7445698463533197	0.9751425678839499	-5.46408
19:7542560-7557284:+	0.11789849548317077	-2.94686	0.5653321840895241	0.5719894782957513	0.7226262859733382	-5.77311	ENSG00000032444	PNPLA6	GBA_Control_v_Control	0.1134462109122043	0.0431143	0.29519206806061055	0.767917	0.9821086447545352	-5.45873
13:28256291-28281379:+	-0.107528	-2.45013	-0.622433	0.5338155787450165	0.6852265724104608	-5.77388	ENSG00000152520	PAN3	GBA_Control_v_Control	0.7928203186436856	-1.47583	1.1544169156981992	0.24864450539128657	0.8416817027257463	-4.95773
11:36393845-36419303:+	0.12418213149634383	-3.04871	0.5522406501867504	0.5809213145294259	0.7284293406235295	-5.77408	ENSG00000135362	PRR5L	GBA_Control_v_Control	0.19943231347959234	-0.485452	0.3561367083416051	0.7218240467294539	0.9670804091739919	-5.45422
7:139073855-139089759:-	-0.119248	-2.97067	-0.560152	0.5755155772030827	0.724899	-5.77574	ENSG00000105939	ZC3HAV1	GBA_Control_v_Control	0.6410658841973926	2.0558909346571355	0.9583387083556412	0.33815673680668945	0.8605768339808534	-5.15042
1:207694352-207701618:+	-0.127293	-3.14036	-0.555977	0.5783652948085339	0.7273972509239913	-5.77588	ENSG00000197721	CR1L	GBA_Control_v_Control	-0.318241	-5.02839	-1.14597	0.2521649100429615	0.842534	-5.11708
11:65435052-65437657:+	-0.117806	-2.76752	-0.560586	0.5752199127501609	0.724899	-5.77696	ENSG00000245532	NEAT1	GBA_Control_v_Control	0.034827066412107754	1.3523765335481268	0.047879	0.9618236192299332	0.9951955291565148	-5.51605
7:6432836-6436533:-	-0.118691	-3.12279	-0.530654	0.5957904035718011	0.7370862245207965	-5.77923	ENSG00000164535	DAGLB	GBA_Control_v_Control	-0.0422751	0.3163677266214755	-0.0896463	0.9285887939745961	0.9915398309595024	-5.49471
20:31782248-31797515:+	-0.123304	-3.27736	-0.535523	0.5924213381199164	0.7345098086728576	-5.77998	ENSG00000088325	TPX2	GBA_Control_v_Control	-0.0400197	-3.00868	-0.134019	0.8934187471113202	0.9839569195536666	-5.54604
7:2213211-2222754:-	0.11837305621025485	-3.0313	0.5359753395345168	0.5921087209646458	0.7345098086728576	-5.78013	ENSG00000002822,ENSG00000286192	MAD1L1,AC069288.1	GBA_Control_v_Control	0.1206822096119673	1.3595571877108916	0.22587430120959912	0.821352	0.9821086447545352	-5.49394
5:112985834-113004077:+	-0.183047	-1.74616	-0.726966	0.46743778162534033	0.6258596773117595	-5.78035	ENSG00000172795	DCP2	GBA_Control_v_Control	0.30393106428693883	2.9755445342736855	0.528849	0.5970445573341531	0.937919	-5.45345
14:96555846-96556413:+	-0.11207	-2.90562	-0.543587	0.5868611396616399	0.7333198449482881	-5.78293	ENSG00000090060	PAPOLA	GBA_Control_v_Control	0.1731367506500492	1.296156042799837	0.25225497239642275	0.800903	0.9821086447545352	-5.4892
X:110067346-110109146:+	0.11208248976467239	-2.62069	0.5621789504729927	0.5741348185555452	0.7242467019945608	-5.78555	ENSG00000265584,ENSG00000157600	MIR3978,TMEM164	GBA_Control_v_Control	0.2768915202281086	-0.00392908	0.40398726213439073	0.686321	0.9604432197693615	-5.43384
10:68737844-68742569:+	-0.162466	-2.15979	-0.631799	0.5276799107536326	0.6789077165941373	-5.7856	ENSG00000060339	CCAR1	GBA_Control_v_Control	-0.370121	-0.886236	-0.816752	0.4142925040401785	0.8827374546744412	-5.21112
2:226864603-226867688:+	-0.126375	-1.09554	-0.78305	0.4338049846679646	0.5949838997943964	-5.78565	ENSG00000144468	RHBDD1	GBA_Control_v_Control	-0.133866	-3.22989	-0.371079	0.7106682330941798	0.9633841297999743	-5.51461
1:117402185-117420649:+	-0.176602	0.77324	-0.971645	0.33148981779404063	0.5003250958962077	-5.78852	ENSG00000198162	MAN1A2	GBA_Control_v_Control	1.0932733767016414	0.5619227508402168	2.2548078726881475	0.0243919	0.5850573040713576	-3.37917
2:101855976-101859864:+	-0.109862	-3.10648	-0.514146	0.6072770298716963	0.7466898388772686	-5.78909	ENSG00000071054	MAP4K4	GBA_Control_v_Control	-0.778513	1.492779526202234	-1.21524	0.22460337979252284	0.8092469413554632	-4.89899
9:86305191-86310017:-	-0.215215	-1.3277	-0.752995	0.45165440803258605	0.6106520317156188	-5.78912	ENSG00000083223	TUT7	GBA_Control_v_Control	0.9336703915747806	2.64222	1.882779162827354	0.0600619	0.648659	-4.04609
2:229858771-229860531:-	-0.11433	-1.52201	-0.724514	0.46893932975984065	0.627013	-5.78971	ENSG00000153827	TRIP12	GBA_Control_v_Control	0.6148572958231124	0.6079429933157238	0.8263671423822261	0.40882115222715354	0.8827087649054147	-5.22991
15:85113872-85121014:+	0.12959278555301113	-3.01447	0.5169147031143513	0.605343	0.7456870999532296	-5.79052	ENSG00000073417	PDE8A	GBA_Control_v_Control	0.5554963303618337	-0.822257	1.4101530498951678	0.1588498989493976	0.7871086807533572	-4.66877
2:226837547-226914351:+	-0.119043	-2.85081	-0.540212	0.5891850964115353	0.7333198449482881	-5.79456	ENSG00000144468	RHBDD1	GBA_Control_v_Control	0.0907808	-3.6915	0.1682782690686476	0.8664032610170023	0.9821086447545352	-5.57708
15:65700543-65701890:-	-0.132565	-2.40062	-0.584586	0.5589734343223673	0.7093850311619462	-5.79483	ENSG00000174485	DENND4A	GBA_Control_v_Control	1.1108410031194804	-1.37837	2.2132202303712667	0.027139837979125066	0.6058918142876922	-3.45694
1:151088189-151118139:+	0.1115322030805721	-3.18532	0.49918659894269557	0.6177705694971397	0.7538058039140243	-5.79523	ENSG00000143458	GABPB2	GBA_Control_v_Control	0.49051557320517425	-1.93679	0.8588553931355927	0.39065554247310086	0.8825577718216362	-5.23112
17:68450727-68452992:-	-0.131781	-2.6782	-0.537189	0.591271	0.7345098086728576	-5.79591	ENSG00000070540	WIPI1	GBA_Control_v_Control	0.20074	1.1222835678382541	0.39490230304409396	0.6930112430135564	0.9631176654860899	-5.44359
15:65729071-65756472:-	-0.156953	-0.491438	-0.863063	0.38833379634854737	0.554432	-5.79722	ENSG00000174485	DENND4A	GBA_Control_v_Control	-0.621808	-1.40935	-0.864317	0.38765083821727686	0.8823077098619806	-5.218
10:1072115-1096246:+	0.0980036	-2.40766	0.563039	0.5735489658849704	0.7240516644517784	-5.79951	ENSG00000047056	WDR37	GBA_Control_v_Control	0.10975160312877907	2.7397861289090284	0.33961527613725967	0.7342277723405987	0.9681161654065235	-5.49846
1:8655972-8656441:-	0.13458156461767934	-1.72912	0.6861232683575701	0.49281301833344016	0.647444	-5.7999	ENSG00000142599	RERE	GBA_Control_v_Control	0.4431692463301351	-0.829359	1.393467837814438	0.163832	0.7871086807533572	-4.68498
22:29978441-29991670:+	-0.128066	-2.19038	-0.604142	0.5459019990695457	0.6970109934887965	-5.80079	ENSG00000100330	MTMR3	GBA_Control_v_Control	1.0164798634320267	0.20228497174584376	1.5010872011187235	0.13369380012239265	0.7583509810996529	-4.56387
8:55941854-55953984:+	-0.109282	-3.16579	-0.482211	0.629774	0.7618086245099416	-5.80194	ENSG00000254087	LYN	GBA_Control_v_Control	1.9736078492933071	0.13789938671887228	2.341284154891809	0.019441172298031717	0.5181226712443692	-3.21445
16:30713207-30713711:+	-0.110136	-3.02891	-0.492004	0.6228371340344427	0.7555950491646166	-5.80207	ENSG00000282034,ENSG00000080603	AC106886.6,SRCAP	GBA_Control_v_Control	-0.675675	-0.435659	-1.66941	0.0953936	0.6963735360482091	-4.33262
20:3218516-3218994:+	-0.117663	-0.963032	-0.749408	0.45380824946103593	0.6117274933293924	-5.80332	ENSG00000125877	ITPA	GBA_Control_v_Control	-0.160651	2.313379916326769	-0.972322	0.33115874741969165	0.8605768339808534	-5.14338
5:73074741-73082825:+	-0.102108	-2.66735	-0.544183	0.5864507471480775	0.7333198449482881	-5.80338	ENSG00000157107	FCHO2	GBA_Control_v_Control	0.34248388798005536	-2.02439	0.6164520393695649	0.5377565768539054	0.9210556552849787	-5.35117
17:36952885-36953907:+	-0.110916	-2.32135	-0.582057	0.5606746894905321	0.7110066492859543	-5.80611	ENSG00000275700	AATF	GBA_Control_v_Control	0.0660992	3.0362740026711035	0.18508345709875865	0.8532064723649377	0.9821086447545352	-5.54158
7:24623662-24668660:+	-0.10124	-2.91549	-0.494995	0.6207253397262675	0.7552064692065104	-5.80647	ENSG00000105926	MPP6	GBA_Control_v_Control	0.0870771	-5.2859	0.40865494694824617	0.682919	0.9579118935070294	-5.62519
10:5699524-5714207:+	-0.126849	-2.99798	-0.495457	0.6203989126543163	0.7552064692065104	-5.80665	ENSG00000108021	TASOR2	GBA_Control_v_Control	0.4377135274814681	0.6952010232816592	0.7808432848736883	0.4351058909856943	0.8930840965342063	-5.24631
3:148586121-148593369:-	0.15399102538718956	-3.10034	0.4713178819675826	0.63753	0.7689752872299895	-5.80858	ENSG00000285557	AC069410.1	GBA_Control_v_Control	0.3187540154379677	-5.0206	1.6086	0.10807018377055358	0.730176	-4.54048
5:151458787-151479489:+	0.13133315844637883	-1.94062	0.6595263604109178	0.5097274315805626	0.6613851295392307	-5.80918	ENSG00000123643	SLC36A1	GBA_Control_v_Control	0.9576233146168249	1.422170262684991	2.701184138912251	0.00704292	0.3941686450609576	-2.45666
8:100259106-100288267:-	-0.112765	-2.68853	-0.52483	0.5998311171246506	0.7405267982737416	-5.80932	ENSG00000034677	RNF19A	GBA_Control_v_Control	-0.160055	-1.02268	-0.216518	0.8286341675898824	0.9821086447545352	-5.48817
2:201342369-201351451:-	-0.110383	-3.1689	-0.475377	0.6346345200647133	0.7660326090500745	-5.80956	ENSG00000155749	FLACC1	GBA_Control_v_Control	-0.0718656	-1.28015	-0.129207	0.8972233733392875	0.9839569195536666	-5.49716
20:63928334-63931022:+	-0.2155	-1.86507	-0.663038	0.5074806567237662	0.6596974757357643	-5.80992	ENSG00000101152	DNAJC5	GBA_Control_v_Control	0.31688956765035103	1.4278114005674594	0.5447535709229884	0.5860618368802369	0.937919	-5.4019
1:111642152-111642870:+	0.1029655583736897	-3.04964	0.4864351821479173	0.626778	0.7592783215732786	-5.81043	ENSG00000116473	RAP1A	GBA_Control_v_Control	-0.0228723	0.8439069484636443	-0.0467658	0.962711	0.9951955291565148	-5.51248
5:83537006-83555038:+	0.0974137	-2.7308	0.4937310405101496	0.6216172367143522	0.7552064692065104	-5.81226	ENSG00000038427	VCAN	GBA_Control_v_Control	-0.442226	2.7022738929396453	-0.61128	0.5411731372053351	0.9210556552849787	-5.38386
22:41342528-41343576:+	-0.118395	-1.10444	-0.714433	0.4751456541208813	0.6331504391023489	-5.81243	ENSG00000100403	ZC3H7B	GBA_Control_v_Control	-0.203305	-2.14058	-0.621416	0.5344875927665601	0.9210556552849787	-5.33857
1:168038370-168045227:+	-0.131168	-1.16059	-0.760711	0.44702984417123615	0.6070041365414721	-5.81341	ENSG00000143164	DCAF6	GBA_Control_v_Control	-0.261663	2.3722231757222714	-0.849095	0.39606066551533625	0.8827087649054147	-5.23729
19:11335446-11335783:-	-0.120209	-1.23561	-0.687066	0.492219	0.6471696980964013	-5.81405	ENSG00000105514	RAB3D	GBA_Control_v_Control	0.00303874	2.635010745063747	0.014217130514984005	0.9886599928413335	0.9983032906699255	-5.54986
1:229527228-229549434:-	0.10174992221949486	-3.20875	0.45789962166462517	0.6471356666856727	0.775744	-5.81555	ENSG00000135776,ENSG00000199672	ABCB10,RNU4-21P	GBA_Control_v_Control	0.9221128400507239	-2.4386	1.5530433865845261	0.12077440839868965	0.7357016639037067	-4.51259
11:76513385-76528466:+	-0.104681	-2.79673	-0.508655	0.6111192361305775	0.748639	-5.81727	ENSG00000158636	EMSY	GBA_Control_v_Control	1.6544985036351996	-2.71157	2.8802727242798873	0.00407033	0.3283825104480537	-2.03367
11:77619605-77625818:-	-0.149928	-2.31447	-0.553758	0.5798831904343327	0.7276710588484638	-5.8178	ENSG00000074201	CLNS1A	GBA_Control_v_Control	1.2255105918398455	0.7549858092446624	1.8753582767937909	0.0610763	0.648659	-4.03535
21:33421479-33432871:+	-0.094198	-2.40444	-0.527322	0.5981005119545872	0.7389335979188756	-5.81803	ENSG00000159128	IFNGR2	GBA_Control_v_Control	2.1562549311689034	0.9718764835718491	2.7243085222029135	0.00657213	0.3941686450609576	-2.40418
14:67761365-67762819:-	0.0968013	-2.57817	0.5082132646207639	0.6114289801750292	0.748639	-5.81862	ENSG00000072121	ZFYVE26	GBA_Control_v_Control	0.5109728192909113	0.23613131342670574	1.6927555644714478	0.0908579	0.6963735360482091	-4.3032
7:138519188-138551180:+	-0.100162	-3.0667	-0.462032	0.6441706455114473	0.7742036605681605	-5.8196	ENSG00000122779	TRIM24	GBA_Control_v_Control	0.3862067260768116	0.3433804776675255	0.7754331124745368	0.4382933136574465	0.8938490480862389	-5.25239
19:2189731-2194577:+	-0.1151	-2.12002	-0.565943	0.5715744519182746	0.7226262859733382	-5.81999	ENSG00000104885	DOT1L	GBA_Control_v_Control	0.00528714	-0.173016	0.019758577839209802	0.98424	0.9971506702600866	-5.49794
16:29809539-29809764:+	0.0940141	-3.16256	0.4351785811943932	0.6635376908036226	0.784667	-5.82038	ENSG00000280607,ENSG00000103495	AC009133.5,MAZ	GBA_Control_v_Control	0.0783882	-0.144091	0.18468594296747323	0.8535181729309389	0.9821086447545352	-5.49337
7:130120748-130122202:+	-0.120337	-2.39698	-0.530111	0.596166	0.7370862245207965	-5.82088	ENSG00000128607	KLHDC10	GBA_Control_v_Control	0.29316032260013003	1.544798964911831	0.718855	0.472422	0.8996202637244488	-5.30114
13:77205255-77243951:-	-0.093516	-2.35468	-0.535018	0.5927699766240155	0.7345098086728576	-5.82121	ENSG00000005810	MYCBP2	GBA_Control_v_Control	0.9390079239076226	1.101231054136849	1.2963668726659465	0.1951909515805223	0.8007786065832116	-4.81803
19:10637643-10638315:+	-0.0894463	-3.00275	-0.443834	0.6572698043876648	0.7821658556808446	-5.82128	ENSG00000129353	SLC44A2	GBA_Control_v_Control	-0.187397	1.4375342556298054	-0.384908	0.7003990466653058	0.9631176654860899	-5.45351
18:21765771-21819646:+	-0.0924616	-3.03747	-0.4519	0.6514506856989027	0.7784951610594005	-5.82147	ENSG00000199977,ENSG00000242971,ENSG00000101752	SNORA73,RN7SL233P,MIB1	GBA_Control_v_Control	0.793305	0.312115	1.4992793641261815	0.13416190614223078	0.7584439071138231	-4.56263
1:207694352-207717691:+	0.11301388547436275	-2.69497	0.5065275580123618	0.6126110612917184	0.748639	-5.82212	ENSG00000197721	CR1L	GBA_Control_v_Control	-0.0167803	-4.7654	-0.0568126	0.9547074107147612	0.9951955291565148	-5.65863
10:13127744-13136897:+	-0.117796	-3.08048	-0.44862	0.653814	0.7802090944791206	-5.8245	ENSG00000123240	OPTN	GBA_Control_v_Control	0.39289154290139505	1.6719970389772214	0.5447357928220553	0.5860740605293867	0.937919	-5.40033
3:197865422-197875775:+	-0.146398	-0.0788963	-0.859189	0.39046602199373515	0.5544856866968301	-5.82582	ENSG00000186001	LRCH3	GBA_Control_v_Control	-0.319078	-4.10139	-0.763241	0.4455251947561214	0.8946831700325871	-5.36767
5:36982164-36986301:+	-0.127266	-0.946983	-0.772997	0.4397280914741122	0.5994295036593478	-5.82654	ENSG00000164190	NIPBL	GBA_Control_v_Control	-0.226072	1.9148112261503878	-1.00642	0.3144935193777215	0.8559777364617792	-5.10461
19:11178344-11178720:-	-0.126902	-1.06114	-0.727853	0.46689408946528377	0.6256306274638559	-5.8275	ENSG00000197256	KANK2	GBA_Control_v_Control	-0.151396	-1.87311	-0.761536	0.4465422849835069	0.8946831700325871	-5.25237
11:47358843-47375729:-	-0.105449	-0.393137	-0.804784	0.42115771481908326	0.5864770915406564	-5.82929	ENSG00000066336	SPI1	GBA_Control_v_Control	0.15997991679486878	1.4420722608096321	0.9911361142853861	0.32189301286566735	0.8559777364617792	-5.10553
20:47246007-47246517:-	0.12408744229951107	-1.27658	0.7101577061021576	0.4777912717196071	0.6361534428255827	-5.8313	ENSG00000101040	ZMYND8	GBA_Control_v_Control	0.5915208243769466	-1.4059	1.0788635648829061	0.28094589436501777	0.8441858999972556	-5.01019
10:68437010-68470163:-	0.0911847	-2.94276	0.44622	0.6555460962141518	0.7817200962667336	-5.83166	ENSG00000138346	DNA2	GBA_Control_v_Control	-0.105402	-0.513805	-0.315594	0.7523862530402758	0.97851	-5.45367
3:150622384-150627914:+	-0.0987721	-3.32202	-0.406266	0.6846446087442172	0.7999167453027353	-5.83197	ENSG00000198843	SELENOT	GBA_Control_v_Control	-0.358168	1.5622414332809613	-0.478873	0.6321485410512591	0.9428759423169835	-5.42225
3:51541588-51552063:+	0.12236499945390733	-2.50949	0.48708180559643294	0.6263195869615362	0.7592711815945266	-5.83255	ENSG00000164080	RAD54L2	GBA_Control_v_Control	0.3649521401643645	-4.74007	0.9910585211517918	0.3219540959994722	0.8559777364617792	-5.23381
2:207576630-207577224:+	-0.112539	-2.84754	-0.455804	0.6486411748187064	0.7767963855353838	-5.83275	ENSG00000118260	CREB1	GBA_Control_v_Control	-0.394108	0.9484645845624967	-0.774729	0.43870929219845056	0.8938490480862389	-5.25746
4:73085248-73092300:-	0.14446179342646287	-2.5931	0.5065444933568475	0.6126003025892276	0.748639	-5.83496	ENSG00000132466	ANKRD17	GBA_Control_v_Control	-0.171388	0.7066459833135527	-0.386343	0.6993367696111644	0.9631176654860899	-5.4439
7:65979398-65980409:-	-0.0909573	-2.78943	-0.452263	0.6511892582057617	0.7784951610594005	-5.83648	ENSG00000169919	GUSB	GBA_Control_v_Control	0.0745123	0.9608454249467874	0.18339411744968476	0.8545312829107374	0.9821086447545352	-5.49395
10:124038514-124046724:-	0.1009158413394271	-1.64261	0.6276485294257677	0.5303942550597733	0.6816612083775079	-5.83721	ENSG00000182022	CHST15	GBA_Control_v_Control	0.9801648373644181	2.6364374876003303	1.4324771969024417	0.152364	0.786634	-4.69138
1:154234590-154235291:+	-0.0981787	-2.68701	-0.442628	0.6581414683187663	0.7821658556808446	-5.83775	ENSG00000143569	UBAP2L	GBA_Control_v_Control	0.5991921470038379	1.8183049208446966	1.2222454873317956	0.22194398277059302	0.8059861096765057	-4.89345
9:17330631-17342444:+	0.10834740394067932	-2.41111	0.5138387051689434	0.6074915544409463	0.7466898388772686	-5.83775	ENSG00000044459	CNTLN	GBA_Control_v_Control	-0.575524	-2.35277	-1.38494	0.16642343243794258	0.7871086807533572	-4.7084
16:31361062-31363374:+	-0.0812993	-2.85243	-0.417408	0.6764804362409101	0.7934192249156565	-5.83904	ENSG00000140678	ITGAX	GBA_Control_v_Control	-0.696002	3.0562528817335792	-1.17263	0.24126507142177592	0.8307451706813072	-4.96376
7:32655986-32679130:-	-0.0913968	-2.80228	-0.429391	0.6677416984783487	0.7873162301581093	-5.84017	ENSG00000229358	DPY19L1P1	GBA_Control_v_Control	0.33832727907604054	-2.926	1.1370305433265382	0.25583676024330465	0.842534	-5.00624
3:170136418-170178938:-	0.0803934	-2.78858	0.44247346704931373	0.6582534981880832	0.7821658556808446	-5.84203	ENSG00000173889	PHC3	GBA_Control_v_Control	-0.875524	-4.73585	-2.53791	0.011331903050286536	0.4640552493031974	-2.8342
21:33550219-33551289:+	-0.0860584	-2.92999	-0.397413	0.6911577163061511	0.8036383695831217	-5.84391	ENSG00000284448,ENSG00000159140	MIR6501,SON	GBA_Control_v_Control	0.35408444886763313	3.881834620887407	0.5061114975994319	0.6129058787711608	0.937919	-5.44513
17:47143882-47172064:-	-0.0972679	-2.46878	-0.495597	0.6203006135847218	0.7552064692065104	-5.84469	ENSG00000239291,ENSG00000262265,ENSG00000004897	AC002558.1,AC002558.3,CDC27	GBA_Control_v_Control	0.22887799529425745	-4.22071	0.4702351738716542	0.6383066612808295	0.9461740461704105	-5.52344
20:34072065-34078553:+	-0.126114	-2.56067	-0.462526	0.6438170964919386	0.7742036605681605	-5.84488	ENSG00000125970	RALY	GBA_Control_v_Control	-0.72075	0.5954813524089646	-1.07838	0.28116233110628797	0.8441858999972556	-5.01739
12:112200637-112228811:-	-0.0942084	-2.91635	-0.413798	0.6791211203457763	0.7945953735613648	-5.84547	ENSG00000173064	HECTD4	GBA_Control_v_Control	0.18507067113772901	0.0757342	0.3749453776914677	0.7077919596467674	0.9633841297999743	-5.44259
1:233177801-233208689:-	0.0725866	-3.16892	0.36669157628629334	0.7139357339273739	0.82302427556745406	-5.846	ENSG00000135749	PCNX2	GBA_Control_v_Control	0.45332609492563036	-1.84908	0.8637751408781958	0.3879481627048741	0.8823077098619806	-5.21155
12:89459637-89472275:-	-0.146363	-2.6039	-0.449373	0.6532731996488724	0.7801178536347488	-5.84606	ENSG00000139323	POC1B	GBA_Control_v_Control	0.22543590368601052	0.1999674451101069	0.42258248635777906	0.6727037407247531	0.9579118935070294	-5.42185
8:99431536-99521010:+	-0.0869294	-2.33415	-0.492541	0.6224576771584718	0.7555950491646166	-5.84611	ENSG00000132549	VPS13B	GBA_Control_v_Control	-0.628594	-3.18173	-0.974331	0.33016455603103523	0.8605768339808534	-5.15396
5:53603451-53604895:+	-0.0807468	-3.15503	-0.367608	0.713252	0.82302427556745406	-5.84733	ENSG00000164258	NDUFS4	GBA_Control_v_Control	0.5105025279308473	0.5224397523247223	1.0424857482789287	0.297474	0.8545498894132294	-5.04982
15:77364073-77365225:-	-0.10419	-1.93556	-0.53833	0.5904827282796199	0.734386	-5.84754	ENSG00000173517	PEAK1	GBA_Control_v_Control	-0.109187	-0.0636705	-0.390433	0.6963116210351685	0.9631176654860899	-5.43049
8:38114191-38119363:+	-0.307808	-0.603466	-0.782051	0.4343969150884688	0.5949838997943964	-5.84791	ENSG00000129691	ASH2L	GBA_Control_v_Control	1.4135928415390233	-0.690841	2.6837140539816806	0.00741848	0.39687857940957605	-2.50036
15:41356038-41375828:+	-0.0900997	-3.10021	-0.398675	0.6902276249430881	0.8031130854327407	-5.84847	ENSG00000285920,ENSG00000137804	AC087721.2,NUSAP1	GBA_Control_v_Control	-0.0544144	-1.61503	-0.0846651	0.9325469804022425	0.9915398309595024	-5.49514
10:68459103-68470163:-	-0.105143	-2.00184	-0.549803	0.5825917250944603	0.7299787361444767	-5.85005	ENSG00000138346	DNA2	GBA_Control_v_Control	0.20686102905496284	-1.18975	0.6850830962783289	0.4934728803472579	0.9093255174783328	-5.29928
X:154695916-154700059:-	0.0732002	-3.11778	0.3543021479726022	0.7231958867178023	0.828837	-5.85105	ENSG00000160219	GAB3	GBA_Control_v_Control	0.4518232242439879	0.6722938524881138	0.9688326205110912	0.33289645271834345	0.8605768339808534	-5.12367
10:6618703-6628377:+	-0.0917966	-3.35617	-0.335533	0.7373018234341675	0.8404139589585657	-5.85116	ENSG00000225948	LINC02648	GBA_Control_v_Control	-0.122915	-1.31859	-0.253836	0.7996821126098246	0.9821086447545352	-5.50078
20:56381432-56386533:-	-0.100805	-2.15205	-0.515571	0.6062816816801746	0.7462954131532354	-5.85189	ENSG00000087586	AURKA	GBA_Control_v_Control	-0.212893	-1.19957	-0.820188	0.4123321226985375	0.8827087649054147	-5.21705
X:150793690-150816078:-	-0.0989954	-1.91635	-0.542481	0.5876224436104438	0.7333198449482881	-5.85207	ENSG00000102181	CD99L2	GBA_Control_v_Control	0.6974516778620661	0.15869401669206515	1.846964238935081	0.0650898	0.648659	-4.07314
15:65715477-65761438:-	-0.121518	-1.19657	-0.682689	0.4949799079782874	0.6487675764992541	-5.85209	ENSG00000264737,ENSG00000174485	MIR4511,DENND4A	GBA_Control_v_Control	0.14405956048065915	-5.38179	0.5125533507579306	0.6086665746330038	0.937919	-5.58801
14:60266537-60268435:+	-0.0773647	-3.21216	-0.355713	0.7221390409263939	0.8281908809531526	-5.85229	ENSG00000100614	PPM1A	GBA_Control_v_Control	0.924204	-1.41566	1.3914554691057297	0.1644410391851062	0.7871086807533572	-4.69513
3:52737585-52741499:-	0.1036910259538475	-2.45338	0.46466642452126594	0.6422833345436016	0.7732919260126161	-5.85238	ENSG00000114904	NEK4	GBA_Control_v_Control	0.7415796938335544	0.8754218249414878	1.8942272762408694	0.058524430080387664	0.648659	-4.00342
19:41341882-41342247:-	0.0788436	-2.85847	0.37464801112053986	0.708011	0.8189848600398305	-5.85299	ENSG00000105329	TGFB1	GBA_Control_v_Control	0.20008320956391668	1.346004784647575	0.4293413362585211	0.6677805441271394	0.9579118935070294	-5.43556
11:65430768-65437657:+	0.11219268043213404	-1.52514	0.6117847960903148	0.5408354696113798	0.6925903284626795	-5.85304	ENSG00000245532	NEAT1	GBA_Control_v_Control	-0.134898	-4.66794	-0.243442	0.8077291350329672	0.9821086447545352	-5.59806
2:127989563-127996491:-	0.0721892	-3.10214	0.3592004230636875	0.7195298565760664	0.8263273797477534	-5.85404	ENSG00000136715	SAP130	GBA_Control_v_Control	0.20946802654264385	-0.561868	0.5603908614171051	0.5753563281151524	0.937919	-5.36438
1:100906851-100921841:+	0.075105	-2.9007	0.3752376688540596	0.7075725935830809	0.8189848600398305	-5.85491	ENSG00000162695	SLC30A7	GBA_Control_v_Control	0.40557310569315064	1.9410470077689526	0.8088969422311747	0.4187943367408772	0.8870740761251853	-5.24975
X:135545422-135556300:+	-0.141595	-0.251463	-0.801588	0.4230040249289666	0.5864770915406564	-5.85529	ENSG00000165359	INTS6L	GBA_Control_v_Control	-0.154193	1.2715855440591526	-0.378236	0.7053468146590249	0.9633841297999743	-5.4629
2:101281858-101295181:-	-0.0817011	-3.11314	-0.348834	0.7272961494768815	0.8329296274769243	-5.85612	ENSG00000163162	RNF149	GBA_Control_v_Control	0.40492896595298244	1.5506372546404643	0.3899956867755009	0.6966346591526077	0.9631176654860899	-5.47386
12:1777853-1784073:+	-0.0985194	-2.0053	-0.540289	0.5891322569721704	0.7333198449482881	-5.85704	ENSG00000006831	ADIPOR2	GBA_Control_v_Control	-0.25036	-0.783348	-0.559426	0.5760145145692055	0.937919	-5.36221
6:149369908-149379518:+	0.0837392	-2.69449	0.42138754492686126	0.6735732584841412	0.7919674376714797	-5.85763	ENSG00000055208	TAB2	GBA_Control_v_Control	0.846918	0.3510217486211972	1.2906405325557615	0.1971693114300216	0.8007786065832116	-4.81157
3:170122590-170126007:-	-0.0868909	-2.77894	-0.390915	0.6959529617406394	0.807536	-5.85832	ENSG00000173889	PHC3	GBA_Control_v_Control	0.0826725	-1.56613	0.20203759820890346	0.8399342987865949	0.9821086447545352	-5.48535
2:48328560-48346751:+	-0.12134	-1.25544	-0.640221	0.5221930212690093	0.6723635603609407	-5.85934	ENSG00000170802	FOXN2	GBA_Control_v_Control	-1.16677	0.31247561714445954	-1.75145	0.0802183	0.6778632079304663	-4.21986
4:48104900-48114402:-	0.0775331	-3.0194	0.3475560237223136	0.7282553264658278	0.8329296274769243	-5.85969	ENSG00000074966,ENSG00000200269,ENSG00000283499	TXK,RNU6-838P,AC079118.2	GBA_Control_v_Control	0.400652	2.6095387617649526	0.6215192414092898	0.5344199430672785	0.9210556552849787	-5.37415
11:68551120-68564432:+	-0.123237	-1.14517	-0.673941	0.5005230627432042	0.6524675639331056	-5.86253	ENSG00000110075	PPP6R3	GBA_Control_v_Control	1.4633396524390898	-0.727756	2.157191993990926	0.031262406801109345	0.610344	-3.56043
17:67945408-67975958:+	-0.107838	-2.30645	-0.484595	0.6280819092540486	0.76031	-5.86328	ENSG00000279880,ENSG00000279573,ENSG00000171634	AC134407.3,AC134407.2,BPTF	GBA_Control_v_Control	-0.274373	-0.773035	-0.484442	0.628194	0.9405053413475982	-5.39498
20:34029768-34031604:+	-0.0676333	-3.13493	-0.30364	0.7614725162500794	0.8583380641377883	-5.86436	ENSG00000125970	RALY	GBA_Control_v_Control	0.0857892	-0.15247	0.16034007555288873	0.8726502032711072	0.9826798758222193	-5.48975
6:42828492-42830172:+	0.0663944	-3.20162	0.3224200947109721	0.7472097367192625	0.8482522974656131	-5.86485	ENSG00000112624	BICRAL	GBA_Control_v_Control	0.32620470958880965	1.083465551941965	0.6202935630005373	0.5352260629250942	0.9210556552849787	-5.35401
X:10063444-10098579:+	-0.114622	-1.68161	-0.59631	0.5511188910379063	0.7025989254933338	-5.86539	ENSG00000047644	WWC3	GBA_Control_v_Control	0.21336405847107187	1.078027851161351	0.4702495561623903	0.6382939297952406	0.9461740461704105	-5.42734
16:71678754-71681905:-	-0.123151	-0.460651	-0.769012	0.44208917226250977	0.6011485417929668	-5.86561	ENSG00000040199	PHLPP2	GBA_Control_v_Control	0.5275565110780169	-0.95628	1.0011122939095536	0.31704931853243834	0.8559777364617792	-5.07879
5:55645788-55664863:-	0.14489660322762266	-3.02234	0.3411849872177681	0.733046	0.8372687492564769	-5.86614	ENSG00000177058	SLC38A9	GBA_Control_v_Control	0.7584373942025033	-2.74254	1.3528711751494014	0.1764462840844165	0.7960817235786821	-4.777
2:218582970-218584721:+	-0.0671378	-3.12563	-0.30723	0.7587394012981546	0.8578609123094961	-5.86625	ENSG00000144580	CNOT9	GBA_Control_v_Control	-0.25839	0.8084069601311629	-0.492302	0.6226297110370216	0.937919	-5.40862
1:91861470-91864279:-	-0.0745305	-2.97788	-0.333243	0.7390286543166678	0.8418107941639655	-5.86668	ENSG00000069702	TGFBR3	GBA_Control_v_Control	0.3276394564818119	0.4669718034915265	0.7115251409174546	0.476949	0.8996202637244488	-5.29943
2:218385146-218387955:+	-0.084163	-2.46928	-0.418322	0.675812	0.7934192249156565	-5.86751	ENSG00000018280	SLC11A1	GBA_Control_v_Control	-0.366307	1.6365643120391271	-0.475189	0.6347711209851363	0.9438913193471123	-5.45351
1:28473553-28476291:+	0.0830277	-2.67231	0.40430297521495245	0.6860864993193823	0.8005137125484661	-5.86809	ENSG00000204138	PHACTR4	GBA_Control_v_Control	-0.491035	-0.686034	-1.59539	0.11098524201842824	0.730176	-4.43797
17:20204332-20205912:+	0.15619518381425834	4.001798690528662	1.1530942240276936	0.24917946764970222	0.42089771245860164	-5.86812	ENSG00000263494,ENSG00000128487	AC004702.1,SPECC1	GBA_Control_v_Control	0.20931834907475544	-4.91946	0.5774743844921334	0.5637838041439276	0.9307699185424331	-5.53683
9:325670-340321:+	-0.0721194	-2.74585	-0.356593	0.7214803729938765	0.8280010569082151	-5.86872	ENSG00000107099	DOCK8	GBA_Control_v_Control	0.9016412139310086	4.163215032521096	1.466233523034287	0.14294399111789263	0.7727919682936442	-4.64985
19:14039507-14039910:+	0.0984554	-2.3832	0.40169021720355336	0.688008	0.8021980880864586	-5.86934	ENSG00000104998	IL27RA	GBA_Control_v_Control	0.16513886791028476	1.8338878267665653	0.3736665569220971	0.7087429363538722	0.9633841297999743	-5.46556
3:183987769-184014447:-	0.0826164	-2.86758	0.3593595513679591	0.7194108674932143	0.8263273797477534	-5.8697	ENSG00000114770	ABCC5	GBA_Control_v_Control	-0.11128	1.5737760435193815	-0.191228	0.8483913844414281	0.9821086447545352	-5.50735
17:37553114-37554059:-	-0.087069	-1.7543	-0.530903	0.5956180068994689	0.7370862245207965	-5.8702	ENSG00000275066	SYNRG	GBA_Control_v_Control	0.32219275703198225	2.9640031997571876	1.1311278918796552	0.25831111956241476	0.842534	-5.0082
1:25340473-25360743:+	0.0770731	-3.16508	0.2913351340664675	0.770863	0.864727	-5.87047	ENSG00000183726	TMEM50A	GBA_Control_v_Control	-0.154773	1.5924513857689706	-0.202772	0.8393604160132698	0.9821086447545352	-5.50625
20:33619516-33623296:+	-0.0715318	-2.6993	-0.339731	0.7341389523883866	0.8375675098528926	-5.87057	ENSG00000078699	CBFA2T2	GBA_Control_v_Control	-0.0798195	-1.24021	-0.258996	0.7956994025106242	0.9821086447545352	-5.47844
13:114040999-114057474:-	-0.0633729	-3.10173	-0.296335	0.7670430378551991	0.8626023178559138	-5.87068	ENSG00000185989	RASA3	GBA_Control_v_Control	0.2595504913043656	0.17168930085094938	0.4352548592017889	0.6634847955303154	0.9579118935070294	-5.42092
3:152299404-152300367:+	-0.0773877	-2.21244	-0.433544	0.6647243666326085	0.7848609082813992	-5.87146	ENSG00000152601	MBNL1	GBA_Control_v_Control	0.139334	4.825479603683151	0.2476792778476512	0.804441	0.9821086447545352	-5.55062
10:26590134-26591413:+	0.0766234	-3.16677	0.2846508666735894	0.7759775739276376	0.8678430040935757	-5.87149	ENSG00000233261	FAM238A	GBA_Control_v_Control	0.2674661375384577	-2.52258	0.8223659338733006	0.41109271244805445	0.8827087649054147	-5.2683
7:5641153-5652510:-	-0.0664097	-2.99949	-0.302784	0.7621248041990302	0.8583380641377883	-5.87162	ENSG00000011275	RNF216	GBA_Control_v_Control	0.30878045391443365	0.11087437567138915	0.6381517086048988	0.5235419198856652	0.9210556552849787	-5.32882
10:87508128-87521169:+	0.0924936	-2.96304	0.34799879409204004	0.7279230547745956	0.8329296274769243	-5.87203	ENSG00000107789	MINPP1	GBA_Control_v_Control	0.19929587748022548	-2.71734	0.41327747314165725	0.6795046029820472	0.9579118935070294	-5.46252
7:48410519-48412583:+	0.0798081	-2.83364	0.32558902646195975	0.7448113925796316	0.8466745620454985	-5.87261	ENSG00000179869	ABCA13	GBA_Control_v_Control	0.10453326782279604	-2.85351	0.3911972084179772	0.6957466773861332	0.9631176654860899	-5.48634
7:99485192-99494631:-	-0.0582525	-3.08483	-0.288734	0.7728519708487334	0.866234	-5.87436	ENSG00000160908	ZNF394	GBA_Control_v_Control	0.2797640683845657	0.836528	0.546533	0.5848386169248221	0.937919	-5.38622
22:29822334-29832342:-	-0.0670131	-3.09859	-0.31283	0.754483	0.8546095477143089	-5.87505	ENSG00000100325	ASCC2	GBA_Control_v_Control	-0.350274	0.34225847300304574	-0.55093	0.5818220351074723	0.937919	-5.37554
6:157036834-157084905:+	0.054384016931947166	-3.01856	0.2700561260126959	0.7871793096924513	0.8747015625239085	-5.8752	ENSG00000049618	ARID1B	GBA_Control_v_Control	0.3475182365587113	0.21570409535281007	0.7342413114613755	0.46299840661159186	0.8992031284658809	-5.28222
3:9418732-9418882:+	0.0543952	-3.36477	0.2581266779771098	0.7963684660838823	0.87794	-5.87544	ENSG00000168137	SETD5	GBA_Control_v_Control	0.037901374557346657	-1.55046	0.11035784886829726	0.9121508894779378	0.9869370526719986	-5.54194
6:57099060-57102879:+	-0.0967889	-2.23337	-0.459865	0.6457247518791913	0.7755163507905309	-5.87584	ENSG00000112200	ZNF451	GBA_Control_v_Control	-0.132454	2.0190708618208726	-0.256723	0.7974531675745173	0.9821086447545352	-5.50933
5:40852173-40854096:+	0.0619331	-3.20484	0.2662680665943686	0.7900940727979462	0.875951	-5.87681	ENSG00000132357	CARD6	GBA_Control_v_Control	0.7407873295913703	-0.813646	1.7682506965324776	0.0773674	0.6675788786005744	-4.20608
1:160323430-160332557:-	-0.101493	-2.05603	-0.445265	0.6562355414988728	0.7819868517931919	-5.87936	ENSG00000122218,ENSG00000202078	COPA,Y_RNA	GBA_Control_v_Control	0.3702949261083397	3.5334751008474696	0.8345089688688165	0.4042220331931292	0.8827087649054147	-5.26326
20:41092471-41101353:+	-0.161174	0.3661102487216381	-0.849912	0.395601	0.5596260004480997	-5.87975	ENSG00000198900	TOP1	GBA_Control_v_Control	-0.193203	3.1613920168980503	-1.16834	0.2429896674854133	0.8326115340979775	-4.98662
12:96909751-96920125:+	-0.0702816	-2.97392	-0.303295	0.7617353606226164	0.8583380641377883	-5.87977	ENSG00000139350	NEDD1	GBA_Control_v_Control	0.38838635254750575	0.0748198	0.8266619094681221	0.408654	0.8827087649054147	-5.20998
9:83678440-83686155:-	-0.126858	-0.384023	-0.754594	0.4506911922514406	0.6106520317156188	-5.87994	ENSG00000135018	UBQLN1	GBA_Control_v_Control	1.1901100205773307	1.5078462117100586	1.764893029128833	0.0779306	0.6675788786005744	-4.2101
8:123077110-123120188:+	-0.092558	-1.78927	-0.536236	0.5919289426303942	0.7345098086728576	-5.88024	ENSG00000156787	TBC1D31	GBA_Control_v_Control	-0.197348	-0.306022	-0.748557	0.4543253750880518	0.8984832800622368	-5.26145
20:1452492-1458274:-	-0.0584639	-2.96259	-0.284158	0.7763550876405901	0.8678430040935757	-5.88108	ENSG00000088833	NSFL1C	GBA_Control_v_Control	0.5463678080793999	2.213372551242661	0.9609552074902735	0.33684	0.8605768339808534	-5.14692
17:35063575-35066466:-	-0.0706263	-2.2657	-0.405648	0.685098	0.7999167453027353	-5.88137	ENSG00000267618,ENSG00000092871	AC004223.3,RFFL	GBA_Control_v_Control	0.28572764990804966	1.614155105504631	1.0134676129220273	0.3111169257960738	0.8559777364617792	-5.08824
7:43986191-43986677:-	-0.0554625	-3.04825	-0.251078	0.8018116180291341	0.8804720122111944	-5.8819	ENSG00000239556,ENSG00000214783,ENSG00000273432	AC004951.2,POLR2J4,AC004951.4	GBA_Control_v_Control	0.2374798871179502	-1.08327	0.6939372021848025	0.487906	0.9071913734391561	-5.30886
18:51054780-51067187:+	0.056956571308043324	-3.24113	0.2478764850652475	0.8042868120045349	0.8822162052973629	-5.88192	ENSG00000141646,ENSG00000267699	SMAD4,AC091551.1	GBA_Control_v_Control	0.7676512098798645	-1.78346	1.0770927573349633	0.2817357240117486	0.8441858999972556	-5.03128
6:149378017-149379518:+	0.0546351	-3.24185	0.2757944746105941	0.7827695709219402	0.872884	-5.88196	ENSG00000055208	TAB2	GBA_Control_v_Control	-0.451529	1.1746001901868994	-0.746981	0.4552759666470263	0.8992031284658809	-5.28712
19:334399-336173:-	-0.0478311	-3.07773	-0.242452	0.8084852732623434	0.8824418125604148	-5.88269	ENSG00000105556	MIER2	GBA_Control_v_Control	0.2349583283426373	-1.03786	0.7259099244931376	0.46808808842012295	0.8996202637244488	-5.27648
Y:3079283-3102194:+	-0.114707	-2.87408	-0.542175	0.5878325680711728	0.7333198449482881	-5.88346	ENSG00000231535	LINC00278	GBA_Control_v_Control	0.18503846418116487	-1.47105	0.6896325219300401	0.49060812419105293	0.9086226604284848	-5.41506
10:13659322-13663509:-	-0.0710052	-2.9789	-0.314473	0.7532351429859807	0.8539377481927493	-5.88477	ENSG00000151474	FRMD4A	GBA_Control_v_Control	-0.0654821	-2.42823	-0.211493	0.8325516259917956	0.9821086447545352	-5.50181
9:33953284-33956146:-	-0.106593	-0.917205	-0.650516	0.5155256285728655	0.6658211772106472	-5.88488	ENSG00000137073	UBAP2	GBA_Control_v_Control	0.4156785872055213	-5.16152	1.5617687014953974	0.11876316948282083	0.7357016639037067	-4.60119
8:21991867-22004030:+	0.056363697187744144	-3.23186	0.2516438068545968	0.8013741443202818	0.8804720122111944	-5.88494	ENSG00000130227	XPO7	GBA_Control_v_Control	0.6641716171728516	-0.305572	1.0869671250365707	0.27735070406419526	0.84418	-5.00038
17:7945727-7945986:+	0.0797368	-2.04981	0.42425039493952127	0.6714851305889025	0.7906195892417723	-5.88501	ENSG00000170037	CNTROB	GBA_Control_v_Control	-0.164614	-0.953042	-0.863623	0.3880313521996679	0.8823077098619806	-5.1859
8:41704040-41708975:-	-0.0552535	-3.17385	-0.239373	0.8108714316166716	0.8830358124978122	-5.88625	ENSG00000029534	ANK1	GBA_Control_v_Control	-0.0865598	-2.60453	-0.196171	0.8445216289759068	0.9821086447545352	-5.51723
20:44503814-44506996:-	0.0574821	-3.01956	0.26199467449715835	0.7933858128845456	0.8772908574914192	-5.88703	ENSG00000132824	SERINC3	GBA_Control_v_Control	0.46003602711001346	0.24372819663118478	0.7200740244384207	0.4716717398996648	0.8996202637244488	-5.28469
6:17646066-17649300:-	-0.0547339	-3.08591	-0.241288	0.8093867726879326	0.8824418125604148	-5.88708	ENSG00000124789	NUP153	GBA_Control_v_Control	-0.0678795	1.582758793558885	-0.118891	0.9053891174280095	0.9864345615157127	-5.51592
9:33960825-33989126:-	0.11035192786303938	-1.37885	0.5810944554620897	0.5613230466236102	0.7112916190800314	-5.8873	ENSG00000137073,ENSG00000226801	UBAP2,OSTCP8	GBA_Control_v_Control	-0.0963081	-0.324148	-0.265395	0.7907677628126863	0.9821086447545352	-5.47432
1:20969473-20981227:-	-0.0713958	-2.30289	-0.39946	0.6896497654838498	0.8029971957332759	-5.88787	ENSG00000075151	EIF4G3	GBA_Control_v_Control	0.5828547267644781	-1.62456	1.5109819697114861	0.13115412261380097	0.7566020021725802	-4.547
17:47129392-47172064:-	-0.0809134	-2.1763	-0.433871	0.6644868151193628	0.7848609082813992	-5.88791	ENSG00000239291,ENSG00000262265,ENSG00000004897	AC002558.1,AC002558.3,CDC27	GBA_Control_v_Control	0.1101327235473093	-3.27971	0.1789744498652716	0.8579992004301086	0.9821086447545352	-5.55089
7:100019230-100024307:+	0.050221220227486985	-3.34352	0.21516853995272894	0.8296849214437487	0.8962332425523458	-5.88791	ENSG00000106261	ZKSCAN1	GBA_Control_v_Control	-0.325377	-2.3363	-0.807035	0.41986565180342783	0.8870740761251853	-5.27001
17:43378751-43379262:-	-0.0385015	-3.21571	-0.17829	0.8585358372096454	0.9127159222995872	-5.88819	ENSG00000188825	LINC00910	GBA_Control_v_Control	-0.0525906	-2.14572	-0.185724	0.8527041366083108	0.9821086447545352	-5.51251
1:95138274-95151419:+	-0.130753	0.0637931	-0.784434	0.4329927116246818	0.5944356196384634	-5.88906	ENSG00000231992,ENSG00000271092,ENSG00000152078	AC092802.3,TLCD4-RWDD3,TLCD4	GBA_Control_v_Control	-0.035121	-3.66978	-0.107837	0.9141495259574225	0.9869370526719986	-5.63363
9:33960825-33996333:-	0.0540636	-3.09473	0.25563954127499705	0.7982879017141221	0.8794786003792723	-5.88947	ENSG00000137073,ENSG00000226801	UBAP2,OSTCP8	GBA_Control_v_Control	0.10631961847166727	-5.20884	0.4089320213145751	0.6827384230003981	0.9579118935070294	-5.60379
5:159194715-159203656:-	-0.0807005	-2.37752	-0.360604	0.7184803971730946	0.8262524567490588	-5.89026	ENSG00000145860	RNF145	GBA_Control_v_Control	0.5528200709243789	2.8345929189209365	1.1329140902593262	0.25756070015957516	0.842534	-5.00383
11:36227084-36227430:+	-0.0384012	-3.23267	-0.188571	0.8504715887013801	0.9072057162831112	-5.89038	ENSG00000179241	LDLRAD3	GBA_Control_v_Control	0.0455864	-2.86647	0.1798248017866116	0.8573317308118799	0.9821086447545352	-5.53884
8:41704040-41706241:-	-0.0551833	-3.12603	-0.214206	0.8304350987958267	0.8962332425523458	-5.89157	ENSG00000029534	ANK1	GBA_Control_v_Control	0.10209819109419283	-1.89899	0.2047224621179403	0.8378365856117236	0.9821086447545352	-5.49628
10:4830674-4873307:+	-0.0692922	-2.76209	-0.294831	0.7681912277791171	0.862896	-5.89197	ENSG00000165568	AKR1E2	GBA_Control_v_Control	-0.120682	-1.93387	-0.326568	0.744073	0.9751425678839499	-5.46932
13:95115921-95188542:-	-0.0471261	-3.03647	-0.218417	0.8271536441412701	0.8948395415677787	-5.89334	ENSG00000125257	ABCC4	GBA_Control_v_Control	1.122123880176339	-3.04621	2.1896871591701066	0.028810371954643494	0.6058918142876922	-3.51421
12:46261295-46261851:-	0.0719882	-2.27674	0.3995588519605584	0.6895767658876328	0.8029971957332759	-5.89354	ENSG00000111371	SLC38A1	GBA_Control_v_Control	0.7836124669964677	-1.22998	1.6045895029709616	0.10894505817964559	0.730176	-4.42423
14:50329832-50342222:-	-0.0945213	-1.83204	-0.493862	0.621525	0.7552064692065104	-5.89396	ENSG00000100490	CDKL1	GBA_Control_v_Control	0.10524784073240756	1.7310183253566496	0.3867951883010589	0.6990018546964876	0.9631176654860899	-5.46367
17:82763964-82781721:+	0.0450385	-2.98902	0.23140733690232418	0.8170512407867366	0.8873409012166436	-5.89443	ENSG00000141556	TBCD	GBA_Control_v_Control	0.5051928051749192	-2.32158	1.3171275536884355	0.18814072639994164	0.8007786065832116	-4.78881
4:78870782-78878891:+	-0.044886	-3.20461	-0.203447	0.8388321542141043	0.9028199916188981	-5.89473	ENSG00000138756	BMP2K	GBA_Control_v_Control	-0.194522	-0.368595	-0.364868	0.7152981577590612	0.9654225135670931	-5.44457
2:160351445-160353537:-	-0.0371493	-3.28324	-0.159949	0.8729573840321473	0.9229820200188762	-5.8952	ENSG00000153250	RBMS1	GBA_Control_v_Control	0.1595848593913134	-0.0616359	0.2914437207985504	0.7707810633304353	0.9821086447545352	-5.46524
11:65430768-65444063:+	-0.053295	-2.79805	-0.253568	0.7998879092962845	0.8804720122111944	-5.89549	ENSG00000245532	NEAT1	GBA_Control_v_Control	-0.730705	-3.78216	-1.03592	0.3005320634735959	0.8553046509813077	-5.14475
1:91501653-91524109:+	-0.057634	-3.02726	-0.260087	0.7948561059305481	0.8772908574914192	-5.89562	ENSG00000097046	CDC7	GBA_Control_v_Control	0.12512606186172737	-1.66251	0.3105022444551624	0.7562530058696056	0.9797444420177993	-5.45741
22:41125863-41131633:+	-0.0480736	-2.99745	-0.242549	0.808411	0.8824418125604148	-5.89563	ENSG00000100393	EP300	GBA_Control_v_Control	-0.138906	-0.923847	-0.277105	0.7817647016429546	0.9821086447545352	-5.47613
16:47497398-47547548:+	0.047634554797212125	-2.88667	0.24459793182488462	0.8068238113337962	0.8824418125604148	-5.89661	ENSG00000262038,ENSG00000102893,ENSG00000222268	AC007599.2,PHKB,RNA5SP425	GBA_Control_v_Control	1.2007535832646976	-1.81245	1.9257249625514161	0.0544625	0.648659	-3.9599
1:1256044-1267992:-	-0.0689725	-2.60339	-0.322952	0.7468071420839163	0.8482522974656131	-5.89702	ENSG00000160087	UBE2J2	GBA_Control_v_Control	-0.333162	0.7186179703755154	-0.602463	0.5470219911251808	0.9212135637905502	-5.3569
7:156756392-156826744:-	0.0333625	-3.16089	0.1510973227486594	0.8799329813328463	0.9280197711418647	-5.89765	ENSG00000105983	LMBR1	GBA_Control_v_Control	0.7226114140848034	-1.01261	1.0544083255766592	0.2919871031711509	0.8481770695923225	-5.02993
22:28699837-28734727:-	-0.0530621	-2.68132	-0.284506	0.7760880537612842	0.8678430040935757	-5.898	ENSG00000183765	CHEK2	GBA_Control_v_Control	0.1358870790885991	-1.952	0.3021101953728483	0.7626398617472284	0.9821086447545352	-5.46804
9:19286768-19305527:+	0.0400167	-2.99692	0.20084240029743075	0.8408674237525312	0.9038517314215749	-5.89884	ENSG00000137145	DENND4C	GBA_Control_v_Control	0.44934732604498784	0.7573402376662334	0.8734053655246364	0.38268182296050646	0.8823077098619806	-5.1959
18:57566446-57580199:-	-0.0667963	-2.59036	-0.312352	0.7548457172485528	0.8546095477143089	-5.89886	ENSG00000066926	FECH	GBA_Control_v_Control	-1.00781	-2.2579	-1.35823	0.17474100816110819	0.7949283772014706	-4.74187
5:97101758-97103094:+	-0.0942773	-1.9789	-0.41711	0.6766982311371175	0.7934192249156565	-5.89888	ENSG00000251513	LIX1-AS1	GBA_Control_v_Control	0.4519837438161756	-2.02207	1.0675225702726974	0.2860303958335475	0.8441858999972556	-5.03039
X:48742918-48743741:-	-0.0411406	-3.14948	-0.158149	0.874375	0.9233180033890542	-5.89968	NA	NA	GBA_Control_v_Control	0.176649	-4.54685	0.8598602949657953	0.3901014870763143	0.8825577718216362	-5.31814
1:159918762-159920537:-	-0.0376187	-3.20224	-0.150191	0.8806479994852188	0.9281908293381558	-5.89986	ENSG00000158710	TAGLN2	GBA_Control_v_Control	-0.25177	3.908058819778094	-0.259619	0.7952186709528478	0.9821086447545352	-5.51783
4:153626146-153632838:+	-0.124169	-1.47081	-0.540379	0.58907	0.7333198449482881	-5.90065	ENSG00000121210	TMEM131L	GBA_Control_v_Control	-0.171537	2.065654924813816	-0.552778	0.5805566325379624	0.937919	-5.41077
11:47752915-47754664:-	-0.0593205	-2.94527	-0.217462	0.8278978690803214	0.8950679473186476	-5.90094	ENSG00000109920	FNBP4	GBA_Control_v_Control	0.21578155546570654	1.9052011264507782	0.3133335200652758	0.7541019675194918	0.9794811212355847	-5.48882
1:229530198-229549434:-	-0.0398617	-3.12121	-0.177135	0.8594424497651265	0.9127159222995872	-5.90108	ENSG00000135776,ENSG00000199672	ABCB10,RNU4-21P	GBA_Control_v_Control	0.1732289844623054	-4.20159	0.35768909906319574	0.7206622619927405	0.9670804091739919	-5.58164
7:102227366-102227669:+	0.054896	-2.71574	0.2527532778840174	0.8005168926387697	0.8804720122111944	-5.90134	ENSG00000257923	CUX1	GBA_Control_v_Control	-0.0651006	-2.15682	-0.244112	0.8072011878125804	0.9821086447545352	-5.4844
9:136221795-136226874:-	0.026525648126809354	-3.17938	0.11505821256629528	0.9084247803966881	0.9423390823939527	-5.90362	ENSG00000165661	QSOX2	GBA_Control_v_Control	0.7702867158519224	-3.5402	1.8197297544404716	0.0691418	0.648659	-4.16449
22:26717252-26718231:+	-0.0557324	-2.55676	-0.260273	0.7947127181010378	0.8772908574914192	-5.90402	ENSG00000244625	MIATNB	GBA_Control_v_Control	0.2745730736113181	1.7836866314015534	0.6332294470594007	0.5267493014567419	0.9210556552849787	-5.35389
10:46010222-46013639:-	0.0642243	-2.60231	0.30264759375297645	0.762229	0.8583380641377883	-5.90436	ENSG00000266412	NCOA4	GBA_Control_v_Control	0.3777784914604156	6.164404630317813	0.5451869147840837	0.5857639202564069	0.937919	-5.45328
7:105062163-105066807:+	-0.0216142	-3.1955	-0.100494	0.919975	0.9476304334263053	-5.90469	ENSG00000005483	KMT2E	GBA_Control_v_Control	1.4314784731056533	-0.93922	1.8198227536326796	0.0691276	0.648659	-4.11332
11:16095995-16186955:-	0.076886	-2.06925	0.42732920325571944	0.669242	0.7885318246824081	-5.90519	ENSG00000110693	SOX6	GBA_Control_v_Control	-0.579881	-4.25221	-1.26406	0.2065582398540094	0.8059861096765057	-4.93343
3:196053417-196062645:-	-0.0380343	-3.1195	-0.175618	0.8606334754697692	0.9127312482406379	-5.90536	ENSG00000072274	TFRC	GBA_Control_v_Control	1.037239487766504	-1.69637	1.8141226744035746	0.0700013	0.648659	-4.12656
7:139715931-139717015:-	-0.0776375	-1.8396	-0.481343	0.6303901847672861	0.7620051261513848	-5.90579	ENSG00000064393	HIPK2	GBA_Control_v_Control	0.0363608	1.3768276782893862	0.1477637470294024	0.8825632497968363	0.9826798758222193	-5.51236
9:107300140-107325004:+	-0.0714965	-2.00037	-0.418593	0.6756137369240796	0.7934192249156565	-5.90611	ENSG00000119318	RAD23B	GBA_Control_v_Control	0.9560982735629553	-3.43516	1.4246689335023075	0.15461	0.786634	-4.6863
20:49165996-49174269:-	-0.0475918	-2.75914	-0.226369	0.8209657408786906	0.8910158234876027	-5.90667	ENSG00000124214	STAU1	GBA_Control_v_Control	-0.0444141	-2.51103	-0.0823943	0.934352	0.9915398309595024	-5.51925
15:65756139-65761438:-	-0.0793696	-2.10662	-0.366334	0.7142027215615132	0.82302427556745406	-5.907	ENSG00000174485	DENND4A	GBA_Control_v_Control	0.5730972530819025	2.7157469373881904	1.228677352652093	0.21952318604815294	0.8059861096765057	-4.90854
7:2437803-2443746:+	-0.00486704	-3.2099	-0.0220908	0.9823804586999018	0.9900460925312936	-5.90711	ENSG00000136213	CHST12	GBA_Control_v_Control	-0.175832	-1.15017	-0.46111	0.6448344899736034	0.9528145891542424	-5.42595
3:119500694-119517315:+	-0.04981	-2.56213	-0.265205	0.7909122313680383	0.875951	-5.9073	ENSG00000113845	TIMMDC1	GBA_Control_v_Control	-0.329114	-1.60972	-0.479791	0.6314958467844727	0.9428759423169835	-5.41054
14:71045132-71057724:+	-0.0209056	-3.15003	-0.0943905	0.9248201129462827	0.9502894551020861	-5.90747	ENSG00000100731	PCNX1	GBA_Control_v_Control	0.5045062128067919	2.175089183743485	0.7554301645656575	0.4501942396151505	0.8979383035689463	-5.29033
16:57164000-57173869:-	0.0809838	-3.17419	0.20982145328876103	0.8338559516310051	0.8980398606725193	-5.90749	ENSG00000172775	PSME3IP1	GBA_Control_v_Control	0.0843344	-0.636583	0.10374059520311918	0.9173989849660651	0.9883428414586085	-5.50056
2:73572261-73573424:+	0.029777141133909613	-3.17106	0.11935080976444604	0.9050242053646751	0.9420555739660815	-5.90788	ENSG00000116127	ALMS1	GBA_Control_v_Control	0.4822842667496463	-1.13571	0.8824852269562223	0.3777568615336042	0.8823077098619806	-5.17877
1:229525935-229542371:-	-0.0232267	-3.33355	-0.0951053	0.9242524898254818	0.9502877712290164	-5.90793	ENSG00000135776,ENSG00000199672	ABCB10,RNU4-21P	GBA_Control_v_Control	-0.115954	-2.33026	-0.19647	0.8442877400636161	0.9821086447545352	-5.52507
10:43154896-43158931:+	-0.0629417	-2.51867	-0.271492	0.7860754065776813	0.8744046837280122	-5.90808	ENSG00000169826	CSGALNACT2	GBA_Control_v_Control	-0.51484	1.9976601505090992	-1.132	0.2579456713231265	0.842534	-4.991
9:137790847-137818138:+	-0.083089	-1.86075	-0.454828	0.6493432826262602	0.7770829447822458	-5.90873	ENSG00000181090	EHMT1	GBA_Control_v_Control	0.796244	0.3436584519127164	2.0919050088826947	0.0367348	0.6278743191681722	-3.67366
2:201307518-201364173:-	-0.00245362	-3.12243	-0.0121787	0.990286	0.9926506338912002	-5.90969	ENSG00000155749	FLACC1	GBA_Control_v_Control	0.7757305764895319	-3.27894	1.7810403162548947	0.0752527	0.6675788786005744	-4.21568
19:38141183-38142710:+	0.00285444	-3.30909	0.013685573848088052	0.9890838817369141	0.9924689356284129	-5.90994	ENSG00000105738	SIPA1L3	GBA_Control_v_Control	0.0163378	-2.33114	0.053458256990974264	0.9573789899282117	0.9951955291565148	-5.52762
15:63749366-63756748:-	0.019300984991347025	-3.10489	0.0899513	0.9283460536332488	0.9521643396763745	-5.91036	ENSG00000103657	HERC1	GBA_Control_v_Control	-0.120364	0.18404804946690875	-0.233128	0.8157166624271797	0.9821086447545352	-5.4772
10:884446-890829:-	-0.0670787	-2.37836	-0.330054	0.7414367197508768	0.8439811881096422	-5.91077	ENSG00000107929	LARP4B	GBA_Control_v_Control	-0.0822249	0.8023307524849288	-0.181015	0.8563977094255033	0.9821086447545352	-5.50137
12:112203635-112226758:-	-0.0035911	-3.19953	-0.0166722	0.9867018562326938	0.9924689356284129	-5.91089	ENSG00000173064	HECTD4	GBA_Control_v_Control	0.6944653020208174	-3.49369	1.2962766922752562	0.19522199405071866	0.8007786065832116	-4.85045
19:37199399-37207254:-	0.0360238	-2.7859	0.14403383776976075	0.8855061629743523	0.9305897691090609	-5.91098	ENSG00000245680,ENSG00000267360	ZNF585B,AC012309.1	GBA_Control_v_Control	0.0893547	-0.462485	0.21473806203507168	0.8300215869269784	0.9821086447545352	-5.47341
1:179986168-180006567:+	-0.0131004	-3.19141	-0.0633438	0.9495068469584517	0.9685431324685543	-5.91127	ENSG00000135837	CEP350	GBA_Control_v_Control	-0.43982	0.6567789429311484	-0.694924	0.4872874698826346	0.9070461883957245	-5.30854
1:44008352-44008623:-	-0.0134749	-3.08101	-0.053908	0.9570204686417738	0.9724628712435692	-5.91135	ENSG00000196517	SLC6A9	GBA_Control_v_Control	-0.0813649	-1.62856	-0.216332	0.8287791588091644	0.9821086447545352	-5.49032
X:124021366-124031125:+	-0.0140259	-3.1496	-0.0614731	0.9509961792628372	0.9694733363584115	-5.91135	ENSG00000101972	STAG2	GBA_Control_v_Control	0.3059355933780079	-0.00527218	0.41392662513704354	0.6790292930613426	0.9579118935070294	-5.43195
12:111418118-111418877:+	-0.0393304	-2.98808	-0.169317	0.8655856443245121	0.9163419273775888	-5.91165	ENSG00000111252	SH2B3	GBA_Control_v_Control	-0.110247	1.10607	-0.214474	0.8302274565121436	0.9821086447545352	-5.50305
18:57562873-57580199:-	-0.0110955	-3.18193	-0.0505183	0.9597206537525874	0.9724628712435692	-5.91175	ENSG00000066926	FECH	GBA_Control_v_Control	0.20176460421771392	-0.731223	0.27820829910340283	0.7809181989935315	0.9821086447545352	-5.48206
3:14443623-14447816:+	-0.0226427	-2.90712	-0.111096	0.9115654230878649	0.9430180809393255	-5.91199	ENSG00000131389	SLC6A6	GBA_Control_v_Control	-0.378402	3.7692651153182433	-0.513897	0.6074540266046513	0.937919	-5.44378
2:127993186-127996491:-	-0.022639	-3.07819	-0.100694	0.9198161330913953	0.9476304334263053	-5.91207	ENSG00000136715	SAP130	GBA_Control_v_Control	-0.0218852	-1.36721	-0.0535835	0.9572792432313932	0.9951955291565148	-5.501
19:2180712-2194577:+	0.0598788	-2.5101	0.271081	0.7863913474861812	0.8744046837280122	-5.91232	ENSG00000104885	DOT1L	GBA_Control_v_Control	-0.0534284	-3.71668	-0.13216	0.8948880910288836	0.9839569195536666	-5.5512
1:174219500-174220454:+	0.00393689	-3.15792	0.015825989138628278	0.9873767406288205	0.9924689356284129	-5.91234	ENSG00000152061	RABGAP1L	GBA_Control_v_Control	-0.0107482	-2.37944	-0.0296373	0.9763630568966711	0.9971493750179506	-5.53762
11:68567013-68596218:+	0.0445864	-2.77487	0.19600247846066923	0.8446527033679535	0.9052164531734619	-5.91279	ENSG00000110075	PPP6R3	GBA_Control_v_Control	-0.253368	-4.5128	-0.530373	0.5959950570585137	0.937919	-5.53986
17:55401468-55403868:-	0.10559264297543214	-1.61831	0.4576699025885314	0.6473006589119834	0.775744	-5.9129	ENSG00000108960	MMD	GBA_Control_v_Control	0.3773075987684653	2.214912020640365	1.1401897643249677	0.2545192648314631	0.842534	-4.98771
17:47129392-47143982:-	-0.0390612	-2.89196	-0.179862	0.8573015690530204	0.9121732157414583	-5.91406	ENSG00000004897	CDC27	GBA_Control_v_Control	0.7297864974150747	-1.06959	1.1176655861336025	0.2640166547658192	0.84418	-4.97737
15:65722847-65761438:-	-0.0229838	-3.02981	-0.114423	0.908929	0.9423390823939527	-5.91416	ENSG00000174485	DENND4A	GBA_Control_v_Control	-1.09328	-4.81412	-2.6617	0.00794612	0.40428892093048985	-2.55598
16:74660931-74661451:-	-0.0238752	-3.01929	-0.114048	0.9092253207136411	0.9423390823939527	-5.91429	ENSG00000168411	RFWD3	GBA_Control_v_Control	-0.321258	0.13092331615459812	-0.730099	0.46552527915483766	0.8994441239366772	-5.27619
15:63774693-63775649:-	-0.0908986	-1.65242	-0.496932	0.6193589266685884	0.7551950892349746	-5.91464	ENSG00000103657	HERC1	GBA_Control_v_Control	0.0521675	4.249181665318635	0.15916655500649185	0.8735743874782074	0.9826798758222193	-5.57106
22:39138635-39141436:-	-0.0804695	-1.40584	-0.510905	0.6095433132748861	0.748639	-5.91469	ENSG00000100307	CBX7	GBA_Control_v_Control	0.0345875	2.9065795250487936	0.1632163798675259	0.8703857435346922	0.9821086447545352	-5.54843
4:1900625-1930770:+	-0.029849	-3.01182	-0.129911	0.8966659529254235	0.9379045410502032	-5.91469	ENSG00000109685	NSD2	GBA_Control_v_Control	0.0505118	-0.185722	0.10763473719138492	0.9143101179663724	0.9869370526719986	-5.48928
16:75600219-75622464:-	0.024773432871777246	-3.17064	0.11241407631023513	0.9105202935113001	0.9430180809393255	-5.91472	ENSG00000259992,ENSG00000065457	AC025287.1,ADAT1	GBA_Control_v_Control	-0.101748	0.8795780435369522	-0.181545	0.8559815002718374	0.9821086447545352	-5.49499
18:77077284-77080793:-	-0.0281067	-3.20824	-0.122885	0.9022256340875086	0.9410652938031157	-5.9148	ENSG00000197971	MBP	GBA_Control_v_Control	0.38532836384662605	0.14998293361912968	0.7578640798886452	0.44873643282681874	0.8978188395464437	-5.26866
4:186706562-186709845:-	0.00337649	-3.19091	0.013147053940571208	0.989513	0.9924689356284129	-5.91542	ENSG00000083857	FAT1	GBA_Control_v_Control	-0.0609766	-4.31255	-0.263474	0.792247	0.9821086447545352	-5.58375
1:229539455-229549434:-	0.0559307	-2.55485	0.24698518574358208	0.8049763112064086	0.8822162052973629	-5.91558	ENSG00000135776	ABCB10	GBA_Control_v_Control	0.1236889317389811	-1.03471	0.197701	0.8433247305763772	0.9821086447545352	-5.53143
19:5653114-5654456:+	0.0468506	-2.7024	0.18780721763507133	0.8510703329830525	0.907268	-5.91677	ENSG00000160633	SAFB	GBA_Control_v_Control	0.2233991798631383	0.6881951489865733	0.3499239972568568	0.7264799543279576	0.967296	-5.4564
4:82946257-82979006:-	-0.000876558	-3.13782	-0.00443909	0.9964591184862682	0.9976475014540515	-5.91693	ENSG00000189308	LIN54	GBA_Control_v_Control	-0.144694	-1.11901	-0.295298	0.7678361980798365	0.9821086447545352	-5.45894
7:155665174-155680908:+	-0.11515	-0.755193	-0.651772	0.5147154439384134	0.6652865514800586	-5.91725	ENSG00000184863	RBM33	GBA_Control_v_Control	0.7969044458071619	0.4554879021456361	1.2750718191564832	0.20262231254710392	0.8027947461613064	-4.83188
15:65715477-65732818:-	-0.027103	-2.862	-0.129329	0.8971260827436727	0.9379045410502032	-5.91845	ENSG00000264737,ENSG00000174485	MIR4511,DENND4A	GBA_Control_v_Control	0.056798	-5.30379	0.19248404676492548	0.8474595655973978	0.9821086447545352	-5.68506
18:76849525-76881512:+	-0.0562033	-2.27863	-0.319642	0.749314	0.8500667151900917	-5.91872	ENSG00000130856	ZNF236	GBA_Control_v_Control	0.0835492	-3.63338	0.16160233393392742	0.871657	0.9826798758222193	-5.56845
3:40461406-40462248:+	0.098005421303990925	-1.96241	0.3731195528991106	0.7091481418211466	0.8194492292620131	-5.91888	ENSG00000188846	RPL14	GBA_Control_v_Control	1.019370453772575	5.192638332171412	1.3638608962834051	0.17296212570076583	0.7934519372994149	-4.77255
4:109491326-109494856:+	-0.101422	-0.18647	-0.704381	0.4813789581658813	0.6377550031941809	-5.91922	ENSG00000138802	SEC24B	GBA_Control_v_Control	0.0861375	1.2369438460758466	0.2509143544730328	0.8019392382268955	0.9821086447545352	-5.49128
17:61982197-61983114:-	0.040568851241697956	-2.67873	0.19577238709458417	0.8448327469462863	0.9052164531734619	-5.91926	ENSG00000108510	MED13	GBA_Control_v_Control	0.16860256475105195	-2.81576	0.2756776571640654	0.7828607553227683	0.9821086447545352	-5.50815
12:101723167-101730636:+	0.00605942	-2.89866	0.0270789	0.9784028498866063	0.9872225871151515	-5.9198	ENSG00000111666	CHPT1	GBA_Control_v_Control	0.7442408838787998	2.0253212994366447	1.24089	0.2149797487007129	0.8059861096765057	-4.88233
6:138943512-138944622:-	-0.132819	-1.74567	-0.431116	0.6664900231201587	0.7863926555296884	-5.92032	ENSG00000135597	REPS1	GBA_Control_v_Control	-0.274368	1.2590040871962591	-0.689642	0.49060247997032735	0.9086226604284848	-5.31379
15:58912562-58916999:-	-0.10211	-1.95241	-0.388975	0.6973877308490614	0.8086422652593743	-5.92046	ENSG00000137776	SLTM	GBA_Control_v_Control	0.4854589080257097	2.6277761245103934	1.1741506469260663	0.24065419024898568	0.8307451706813072	-4.95819
19:7184315-7184637:-	0.026960294004623186	-2.69131	0.11758746170817973	0.9064209137855895	0.9423390823939527	-5.92047	ENSG00000171105	INSR	GBA_Control_v_Control	0.19627081325985252	-2.58398	0.5291363399203262	0.5968450932347107	0.937919	-5.43722
2:33186855-33222151:+	5.560711892940162e-4	-3.02169	0.00264125	0.9978931779749924	0.9984878699761695	-5.92125	ENSG00000049323	LTBP1	GBA_Control_v_Control	-0.576918	-3.38119	-1.42608	0.1542026625762652	0.786634	-4.70378
11:77698486-77702495:-	0.016370377540692038	-2.88661	0.0699734	0.9442304308130657	0.9655072432004489	-5.92266	ENSG00000048649	RSF1	GBA_Control_v_Control	-0.185054	-0.486792	-0.382238	0.7023774399153915	0.9633841297999743	-5.44133
7:99493039-99494631:-	-0.167898	-2.0407	-0.443432	0.6575636082767753	0.7821658556808446	-5.92271	ENSG00000160908	ZNF394	GBA_Control_v_Control	-0.0105001	-0.0340883	-0.0231832	0.9815093920337691	0.9971506702600866	-5.4943
6:49606847-49615771:-	-0.0192778	-2.82927	-0.0913254	0.9272544710102202	0.9516260738546208	-5.92293	ENSG00000112077	RHAG	GBA_Control_v_Control	0.2709953561343901	-1.47328	0.7738928103636924	0.43920323876342515	0.8938490480862389	-5.25916
19:53805279-53814988:-	0.012900221072884577	-2.82579	0.0655552	0.9477465656224732	0.9673352484377704	-5.92332	ENSG00000142405	NLRP12	GBA_Control_v_Control	0.8731668981832175	0.34903293582754574	1.1968368447752926	0.23169435439972466	0.8241839428752918	-4.90597
7:139266332-139272440:+	-0.0147864	-2.8038	-0.0661832	0.9472467272682176	0.9673352484377704	-5.92349	ENSG00000157741	UBN2	GBA_Control_v_Control	0.32994715774514294	0.5023331192116334	0.7707181396993243	0.4410820910644233	0.8938490480862389	-5.25229
1:23030468-23059167:+	0.018668104203198643	-2.76116	0.0916839	0.9269697196054099	0.9516260738546208	-5.92356	ENSG00000263793,ENSG00000004487	MIR3115,KDM1A	GBA_Control_v_Control	0.5253302500600769	1.9874525815714934	1.1069961552023597	0.2685998537219598	0.84418	-5.0104
16:1809237-1823037:-	0.0554177	-2.50378	0.2392281134313276	0.8109834561474845	0.8830358124978122	-5.92529	ENSG00000063854	HAGH	GBA_Control_v_Control	0.669006	4.575960545087568	1.0272457633368572	0.30458866862665573	0.8559777364617792	-5.12569
10:4830674-4909606:+	0.00287559	-2.84444	0.013373501216299023	0.9893327873441526	0.9924689356284129	-5.92559	ENSG00000165568	AKR1E2	GBA_Control_v_Control	0.3940788924265628	-2.69092	1.416890417141789	0.15687078938791818	0.7871086807533572	-4.68084
16:68190767-68191775:+	-0.077862	-1.09874	-0.586438	0.5577288760643822	0.7088461386826654	-5.92566	ENSG00000072736	NFATC3	GBA_Control_v_Control	0.3605729363151242	1.031824410429252	1.1832229107184593	0.2370421315224838	0.8307451706813072	-4.92827
3:152299404-152300973:+	-0.0372547	-2.56071	-0.17731	0.8593052311662883	0.9127159222995872	-5.92575	ENSG00000152601	MBNL1	GBA_Control_v_Control	-0.368469	2.5375658986240097	-0.63478	0.5257379712345982	0.9210556552849787	-5.36385
16:53154446-53157541:+	-0.0685373	-1.96885	-0.383579	0.7013813639793783	0.8127117392142004	-5.92603	ENSG00000177200	CHD9	GBA_Control_v_Control	0.7144737407193604	-0.555432	2.0764511713109295	0.0381436	0.6278743191681722	-3.69793
15:90219792-90221765:+	-0.0379695	-2.46553	-0.196698	0.8441081777355964	0.9052164531734619	-5.92673	ENSG00000185033	SEMA4B	GBA_Control_v_Control	0.2261862068223104	1.1021639701232635	0.6150398734768154	0.5386883185646687	0.9210556552849787	-5.35267
14:55380572-55382191:-	-0.0544407	-2.2413	-0.259567	0.7952571084585707	0.8772908574914192	-5.92678	ENSG00000126775	ATG14	GBA_Control_v_Control	0.6393546428406651	-1.27453	1.0979869713587758	0.27251225731188355	0.84418	-4.99389
22:37812886-37813609:+	-0.054956	-2.29477	-0.251191	0.8017242741437773	0.8804720122111944	-5.9277	ENSG00000100116	GCAT	GBA_Control_v_Control	0.031903812179193025	-0.0593004	0.094075	0.9250711503057152	0.9901957757251683	-5.49097
13:27089882-27116596:-	0.0496563	-2.64388	0.18214726462514835	0.855509	0.910843	-5.92915	ENSG00000152484	USP12	GBA_Control_v_Control	0.9427145441666588	1.4169690312831535	1.3344886921216812	0.18239094810478235	0.8007786065832116	-4.76529
2:23798137-23823569:-	-0.0308814	-2.58512	-0.156097	0.8759915166715311	0.9244435930179137	-5.92948	ENSG00000119778	ATAD2B	GBA_Control_v_Control	0.36194452374419495	-4.58184	0.8186504588705593	0.41322756951498274	0.8827087649054147	-5.35678
9:33944364-33948587:-	-0.0264968	-2.80094	-0.128073	0.8981202926905294	0.9383596586355936	-5.93024	ENSG00000137073	UBAP2	GBA_Control_v_Control	0.0570333	-4.45567	0.15117966476316186	0.8798688409312749	0.9826798758222193	-5.62146
15:50583088-50592626:-	-0.0552932	-2.39149	-0.245445	0.8061678994526131	0.8824418125604148	-5.93029	ENSG00000092439	TRPM7	GBA_Control_v_Control	1.7101221464835294	-2.7375	3.7177355153783487	2.13805271872213e-4	0.2602274996824416	0.2773506421203269
17:32362913-32368014:+	-0.0555639	-2.38012	-0.26714	0.7894230171123959	0.875951	-5.93082	ENSG00000010244	ZNF207	GBA_Control_v_Control	-0.197713	3.5357659882145245	-0.387502	0.6984787682189714	0.9631176654860899	-5.49979
3:9388086-9390497:-	-0.016693	-2.61691	-0.0661402	0.9472810088367678	0.9673352484377704	-5.93116	ENSG00000206573	THUMPD3-AS1	GBA_Control_v_Control	-0.0328294	1.5083298271993129	-0.0654239	0.947851	0.9951955291565148	-5.5161
9:33948373-33963791:-	0.0374744	-2.63018	0.19313096538709917	0.8469002052629078	0.9059507559789978	-5.93234	ENSG00000137073,ENSG00000238886	UBAP2,SNORD121A	GBA_Control_v_Control	0.22578098946594993	-2.15577	0.42505554135755896	0.6709007041690577	0.9579118935070294	-5.45215
21:33414887-33432871:+	-0.0320647	-2.48917	-0.171833	0.8636080004312576	0.9148251310562029	-5.93339	ENSG00000159128	IFNGR2	GBA_Control_v_Control	0.1333966532065014	1.8862982419975576	0.20173737697992528	0.8401689359732146	0.9821086447545352	-5.52478
8:38819521-38820635:+	-0.0667187	-2.10749	-0.361316	0.717949	0.8262069698054452	-5.93445	ENSG00000147526	TACC1	GBA_Control_v_Control	-0.0221498	1.0428959926422492	-0.0347459	0.9722902909257425	0.9964404752602921	-5.52335
13:99238426-99244624:+	-0.0199236	-2.44384	-0.111363	0.9113532791990654	0.9430180809393255	-5.93463	ENSG00000134882	UBAC2	GBA_Control_v_Control	1.1518320450431845	1.2494183332491822	2.4472215572274387	0.014591931798231258	0.5181226712443692	-3.0036
8:123333877-123336532:-	0.024334263525991773	-2.7725	0.0713299	0.9431514928214869	0.9649916858301502	-5.93592	ENSG00000156802	ATAD2	GBA_Control_v_Control	0.7318454797739113	-3.45421	1.9556734269492178	0.0508216	0.648659	-3.93504
2:85368685-85371562:+	-0.0522123	-2.10613	-0.274213	0.7839843677787594	0.872884	-5.93648	ENSG00000115459	ELMOD3	GBA_Control_v_Control	0.4328337789994894	0.8519598708685238	1.634038722623437	0.10261029506485712	0.7269311620839456	-4.38671
7:155706859-155718443:+	-0.0487429	-2.2524	-0.265543	0.7906521186074765	0.875951	-5.93652	ENSG00000184863	RBM33	GBA_Control_v_Control	0.48949691102983994	0.29307532206806397	0.996183	0.3194365787329288	0.8559777364617792	-5.08505
4:109462900-109463644:+	-0.0785967	-1.66449	-0.457728	0.6472589723276962	0.775744	-5.93653	ENSG00000138802	SEC24B	GBA_Control_v_Control	0.2661984195907241	-1.08694	0.49039698393817044	0.6239759701071682	0.937919	-5.39147
5:50399106-50416090:-	0.040310898590163013	-2.18884	0.2140239853866463	0.830577	0.8962332425523458	-5.93764	ENSG00000170571	EMB	GBA_Control_v_Control	0.6080247555774418	2.631949422746158	1.0670380681106166	0.28624899090762246	0.8441858999972556	-5.05981
10:114843740-114848737:+	0.010172655330153824	-2.58298	0.0519474	0.9585822266782447	0.9724628712435692	-5.93795	ENSG00000151553	FAM160B1	GBA_Control_v_Control	0.24213995006597555	1.7837308931560412	0.6025710581629621	0.5469502220143705	0.9212135637905502	-5.37274
12:69251128-69262562:+	-0.0841526	-1.83983	-0.394732	0.6931344503033454	0.8048220899442027	-5.9381	ENSG00000111605	CPSF6	GBA_Control_v_Control	-0.0654538	1.915538248198011	-0.169859	0.8651600621231981	0.9821086447545352	-5.51716
2:231075510-231087181:+	0.0737057	-1.76076	0.40919273008360224	0.6824960975783951	0.7979881252326779	-5.93827	ENSG00000173692	PSMD1	GBA_Control_v_Control	0.32997167682760864	2.3691208343290335	0.9535880477456818	0.34055558810735187	0.8605768339808534	-5.15762
4:128074459-128091512:+	-0.00890387	-2.71438	-0.0362917	0.9710578583172289	0.982172	-5.93964	ENSG00000138709	LARP1B	GBA_Control_v_Control	0.13681852935605654	-1.37235	0.3614430102855634	0.7178555668084685	0.9670804091739919	-5.45771
11:47358843-47375732:-	-0.0646252	-1.71241	-0.395807	0.6923417079739336	0.8044579430368405	-5.94016	ENSG00000066336	SPI1	GBA_Control_v_Control	-0.15149	3.0403674780285264	-0.607053	0.5439733085253171	0.9210556552849787	-5.40959
17:67891843-67894165:+	-0.0150259	-2.65639	-0.0508299	0.9594725405425771	0.9724628712435692	-5.94172	ENSG00000171634	BPTF	GBA_Control_v_Control	0.5355118984188008	-0.430488	0.7487894702354412	0.4541853611068676	0.8984832800622368	-5.271
1:205268949-205269884:+	-0.121044	-0.530913	-0.657538	0.5110040284693443	0.6625295473359298	-5.94232	ENSG00000133069	TMCC2	GBA_Control_v_Control	0.031134050397833235	0.6601604115541114	0.16670879341149278	0.8676376870034019	0.9821086447545352	-5.49224
15:77133004-77133750:-	-0.0381044	-2.41258	-0.18658	0.8520325558564295	0.9077174246719195	-5.94281	ENSG00000173517	PEAK1	GBA_Control_v_Control	-0.270688	-1.21298	-1.03041	0.3031008143739595	0.8553046509813077	-5.04916
19:17276494-17276909:+	-0.180221	-0.47452	-0.608086	0.543288	0.6942014368969334	-5.94295	ENSG00000105393,ENSG00000269307	BABAM1,AC010463.1	GBA_Control_v_Control	0.27283948332253294	3.1874536971639884	0.6860424918650576	0.4928680688469159	0.9093255174783328	-5.36826
2:178535731-178542361:+	0.00946578	-2.55329	0.041168249186827176	0.9671709443235235	0.9793346098494495	-5.94302	ENSG00000270956,ENSG00000237298	AC009948.2,TTN-AS1	GBA_Control_v_Control	-0.017488	2.3584719879924543	-0.0361883	0.9711404518441724	0.9964404752602921	-5.54416
12:49097565-49098105:-	-0.045924	-1.78435	-0.294647	0.7683317819333578	0.862896	-5.94585	ENSG00000139636	LMBR1L	GBA_Control_v_Control	-0.0455691	2.043684475967079	-0.213125	0.8312794391891072	0.9821086447545352	-5.51184
14:99257470-99257836:-	-0.0672037	-1.43845	-0.374315	0.7082584971875128	0.8189848600398305	-5.9474	ENSG00000127152	BCL11B	GBA_Control_v_Control	-0.0057138	0.9097404373927719	-0.0203877	0.9837387512309501	0.9971506702600866	-5.50573
9:96458378-96465778:+	-0.00584859	-2.3635	-0.0259099	0.979335	0.9875696108548799	-5.94771	ENSG00000130956	HABP4	GBA_Control_v_Control	0.45017991510293043	-0.0580658	1.0548304835747115	0.291794	0.8481770695923225	-5.02902
7:44050224-44052941:+	1.1323406951246895e-4	-2.36113	5.825232470921837e-4	0.9995353434874432	0.9995353434874432	-5.94888	ENSG00000284067,ENSG00000136279	MIR6837,DBNL	GBA_Control_v_Control	0.6540103237580772	4.1626805414444785	1.3842747359780603	0.16662731734718084	0.7871086807533572	-4.74841
11:32927156-32935435:+	-0.0851524	-1.48617	-0.480061	0.6313015509934361	0.7625577727467477	-5.94989	ENSG00000060749	QSER1	GBA_Control_v_Control	0.2624731230345958	-0.213074	0.9001236812386701	0.36830201545531893	0.8801117196442911	-5.15632
3:44945167-44959460:-	-0.0567838	-1.99802	-0.30495	0.7604752855616741	0.8583380641377883	-5.95053	ENSG00000163812	ZDHHC3	GBA_Control_v_Control	0.27855247773857705	1.5240879959028608	0.6816362507169442	0.4956493776099399	0.9093255174783328	-5.33028
16:67628369-67629533:+	0.0574469	-2.24457	0.19605398573258875	0.8446129287261684	0.9052164531734619	-5.95096	ENSG00000102974	CTCF	GBA_Control_v_Control	-0.0371286	-0.386167	-0.107224	0.9146361250492138	0.9869370526719986	-5.48674
8:130290000-130358143:-	0.0540131	-1.81878	0.2972661511516837	0.7663322783983473	0.862381	-5.95506	ENSG00000153317	ASAP1	GBA_Control_v_Control	1.0332212756509769	0.14887466603113703	2.0040832148407883	0.045369	0.641135	-3.82386
19:8536251-8540028:-	-0.0392608	-2.27349	-0.144723	0.8849626769670129	0.9305897691090609	-5.95517	ENSG00000142347	MYO1F	GBA_Control_v_Control	0.4837375463189799	0.597598	0.5972331054894294	0.5505062864750285	0.9240336626802519	-5.36733
6:87210450-87218731:+	0.00608488	-2.28269	0.028200632230855026	0.9775084176131034	0.9869131889190622	-5.95807	ENSG00000188994	ZNF292	GBA_Control_v_Control	0.0873218	-0.47447	0.18903575693169364	0.850109	0.9821086447545352	-5.48223
9:92975237-92976709:+	-0.0203768	-2.19106	-0.118474	0.9057188951137276	0.9421945631325579	-5.96139	ENSG00000127084	FGD3	GBA_Control_v_Control	0.24950030466927142	3.2160882303437615	0.7696149968911088	0.441736	0.8938490480862389	-5.31169
18:62539680-62550460:+	0.0784619	-1.90782	0.28579520779408213	0.7751017405296207	0.8678430040935757	-5.96152	ENSG00000141664	ZCCHC2	GBA_Control_v_Control	0.5120185244542892	1.6260324493066913	1.1887497432969747	0.23486071191794247	0.8301708111794218	-4.93061
19:45521321-45522818:+	-0.00262124	-2.19787	-0.0138995	0.9889132631507194	0.9924689356284129	-5.96198	ENSG00000125753	VASP	GBA_Control_v_Control	-0.493519	4.396672228456942	-1.03488	0.3010103888909104	0.8553046509813077	-5.10056
14:67685014-67690421:-	-0.00261692	-2.17779	-0.0137732	0.9890139969174817	0.9924689356284129	-5.96205	ENSG00000258466,ENSG00000072042	AL049779.1,RDH11	GBA_Control_v_Control	0.049931199847926155	2.4131037572475624	0.14141573676783695	0.8875740775604919	0.9837948889599599	-5.52862
11:36393845-36403378:+	-0.0232416	-2.1793	-0.108498	0.9136248364461144	0.9434047357890688	-5.96244	ENSG00000135362	PRR5L	GBA_Control_v_Control	0.8682386467504468	-2.16101	1.356853333292105	0.17517778413611917	0.7949283772014706	-4.73307
15:90217438-90221765:+	-0.0907627	-1.10982	-0.505598	0.6132635181838895	0.7488505069314548	-5.96709	ENSG00000185033	SEMA4B	GBA_Control_v_Control	-0.370665	0.12502627501298852	-0.683298	0.4945995441476917	0.9093255174783328	-5.30071
13:40908158-40914105:-	0.09288	-2.18635	0.24331471496326476	0.8078188023964674	0.8824418125604148	-5.96841	ENSG00000239827,ENSG00000168852	SUGT1P3,TPTE2P5	GBA_Control_v_Control	0.6275160723074567	-0.822747	1.2260835973754103	0.22049711776389438	0.8059861096765057	-4.86851
9:120437294-120448126:-	0.0411936	-2.0733	0.23652483186685283	0.8130795430785225	0.8847443634665192	-5.969	ENSG00000136861	CDK5RAP2	GBA_Control_v_Control	0.16880622720627247	0.9899911994477126	0.40327170931302353	0.686847	0.9604432197693615	-5.44168
19:11513055-11514221:-	-0.0265489	-2.04492	-0.135688	0.8920981891861914	0.9349768162569385	-5.9692	ENSG00000130159	ECSIT	GBA_Control_v_Control	0.23285898793055182	0.47945225265885594	0.8987586590743439	0.36902838036306196	0.8801117196442911	-5.15986
19:45517662-45518094:+	-0.0558604	-1.90096	-0.235608	0.8137907551354947	0.8849447395547252	-5.96966	ENSG00000125753	VASP	GBA_Control_v_Control	0.12605093038764803	3.684207124374802	0.2908299753673588	0.7712502855188551	0.9821086447545352	-5.54566
20:35714184-35725155:-	0.0289004	-2.24653	0.10308606769107606	0.9179179586384043	0.946673	-5.97041	ENSG00000131051	RBM39	GBA_Control_v_Control	-0.510539	2.650794232257105	-0.670989	0.5024045520973877	0.9155382003440459	-5.35592
13:19730238-19782791:-	-0.0859484	-1.40816	-0.421976	0.6731438152121387	0.7919674376714797	-5.97186	ENSG00000121390,ENSG00000275014	PSPC1,RN7SL166P	GBA_Control_v_Control	-0.139923	0.8886356521315741	-0.227508	0.8200819042717068	0.9821086447545352	-5.49624
6:37282881-37317206:+	-0.00194638	-2.27886	-0.00924894	0.9926225797973321	0.9943993505248929	-5.97348	ENSG00000065491	TBC1D22B	GBA_Control_v_Control	0.7701173895019253	-1.86432	1.3867605290501406	0.16586801791399194	0.7871086807533572	-4.70276
X:148651998-148662768:+	-0.00994517	-2.09604	-0.0524285	0.9581989829959545	0.9724628712435692	-5.97368	ENSG00000155966	AFF2	GBA_Control_v_Control	0.0877757	-2.87534	0.3803802139754361	0.7037554825931374	0.9633841297999743	-5.48621
4:53425871-53444103:+	-0.0791298	-0.915999	-0.517341	0.6050460908968537	0.7456870999532296	-5.97902	ENSG00000282278,ENSG00000145216	AC058822.1,FIP1L1	GBA_Control_v_Control	0.7612520666128579	-3.85406	1.3550608274068647	0.17574793330936103	0.7953659838986985	-4.80608
14:21230318-21234229:-	-0.134895	-0.74697	-0.509446	0.6105668390036579	0.748639	-5.97962	ENSG00000092199	HNRNPC	GBA_Control_v_Control	1.1155250251856081	5.669095058002884	2.107924442696015	0.035321420558500315	0.6278743191681722	-3.67393
14:30935162-30956242:-	-0.0559889	-1.71243	-0.291165	0.7709927777778827	0.864727	-5.97992	ENSG00000196792	STRN3	GBA_Control_v_Control	0.12563747192612817	-0.573954	0.2154399941048746	0.829475	0.9821086447545352	-5.47739
20:56386256-56388202:-	0.0572761	-1.70669	0.24720301438314668	0.8048077873526989	0.8822162052973629	-5.98075	ENSG00000087586	AURKA	GBA_Control_v_Control	0.6338055218381307	-1.93596	2.294765985305029	0.021982400159964725	0.5508723860982205	-3.30321
3:15032378-15034809:+	0.018058043797540738	-1.93658	0.10905178558515548	0.9131858524142134	0.9434047357890688	-5.98224	ENSG00000177463	NR2C2	GBA_Control_v_Control	0.5367766294491005	1.8356310190285037	2.0578235186871376	0.0399027	0.641135	-3.74276
2:50921868-50925955:-	-0.0422222	-1.7005	-0.218851	0.8268159513899391	0.8948395415677787	-5.98461	ENSG00000179915	NRXN1	GBA_Control_v_Control	0.41676130297877134	-3.71159	1.6602672417625264	0.0972189	0.7013155416861646	-4.40663
7:24623665-24668660:+	0.021748378594026452	-1.97403	0.12196782605534656	0.902952	0.9410652938031157	-5.98634	ENSG00000105926	MPP6	GBA_Control_v_Control	0.30579806284277655	0.48919806562510404	1.0336419816988494	0.3015890802336522	0.8553046509813077	-5.05095
8:130152735-130169067:-	0.0950758	-0.920973	0.46437651759226284	0.6424909093434183	0.7732919260126161	-5.98705	ENSG00000153317	ASAP1	GBA_Control_v_Control	0.22997369435336257	3.1911784090121884	0.6443028808348162	0.519548	0.9210556552849787	-5.38716
20:43702489-43702903:+	-0.0469909	-1.79709	-0.223598	0.823121	0.8927776714938551	-5.98795	ENSG00000101057	MYBL2	GBA_Control_v_Control	-0.0557925	-0.580684	-0.23543	0.8139304209808973	0.9821086447545352	-5.46955
21:46399589-46402483:+	0.0741418	-1.643	0.32882306257059435	0.7423663281742281	0.8444668462090305	-5.9886	ENSG00000160299	PCNT	GBA_Control_v_Control	0.0369361	-0.842868	0.0735443	0.9413898082465271	0.9925242669922577	-5.48911
17:32171042-32176213:+	-0.0751297	-1.78566	-0.222496	0.8239795867365954	0.8931321666434756	-5.98898	ENSG00000126858	RHOT1	GBA_Control_v_Control	0.32911754298747864	1.1724085942217854	0.6300914046287046	0.5287993057565973	0.9210556552849787	-5.34477
10:26759061-26770345:-	0.0755676	-1.2293	0.44183539549494477	0.6587150208056667	0.7821658556808446	-5.98915	ENSG00000136754	ABI1	GBA_Control_v_Control	0.00564038	4.237133681593241	0.020645933196256214	0.983533	0.9971506702600866	-5.58412
4:48369848-48383784:+	-0.0925878	-0.265771	-0.60936	0.5424404545335199	0.6936462476479663	-5.9932	ENSG00000109171	SLAIN2	GBA_Control_v_Control	-0.158102	1.325971334435902	-0.345035	0.7301510993857682	0.9673821440412214	-5.46789
17:46170854-46172232:-	0.12914289686544844	-0.0654213	0.6117506368672118	0.5408586497153229	0.6925903284626795	-5.99677	ENSG00000120071	KANSL1	GBA_Control_v_Control	0.3380958618334464	0.4886924701706896	0.4699829331984617	0.6384843325259529	0.9461740461704105	-5.4251
16:69155870-69167185:+	-0.00705018	-1.97928	-0.0405434	0.9676689206314693	0.9793346098494495	-5.99696	ENSG00000141076	UTP4	GBA_Control_v_Control	0.6894948249506667	-2.11882	1.5981263420505962	0.11037592801303545	0.730176	-4.44127
19:10904950-10909207:+	0.053624994031024276	-1.4949	0.27487687194348615	0.783474	0.872884	-5.99974	ENSG00000142453	CARM1	GBA_Control_v_Control	0.4809064015868598	0.9043793327745656	1.5881561829551822	0.11261221089556676	0.7321423529168616	-4.45306
4:53414614-53428183:+	-0.103419	0.4380472510235445	-0.677961	0.49797136712157064	0.6515437088538206	-6	ENSG00000282278,ENSG00000145216	AC058822.1,FIP1L1	GBA_Control_v_Control	-0.525338	-2.89756	-0.854509	0.3930567953866686	0.8827087649054147	-5.24969
14:80831142-80840768:-	-0.0283431	-1.7061	-0.158534	0.8740720221325066	0.9233180033890542	-6.00077	ENSG00000100629	CEP128	GBA_Control_v_Control	-0.467106	-1.61819	-1.05954	0.2896456763789225	0.8463996107562392	-5.02916
13:26400452-26401624:+	0.0718201	-1.34908	0.33950923909853087	0.734306	0.8375675098528926	-6.00148	ENSG00000132964	CDK8	GBA_Control_v_Control	0.0220842	0.8153770574666712	0.10760512861814495	0.9143335866836493	0.9869370526719986	-5.4987
3:195878252-195888606:-	0.00973818	-1.76593	0.0564232	0.9550172612910686	0.9724628712435692	-6.00162	ENSG00000276489,ENSG00000061938	MIR6829,TNK2	GBA_Control_v_Control	0.29347437158133616	1.4035892819654776	1.1721508447188396	0.2414554158978427	0.8307451706813072	-4.94205
4:98574456-98574905:-	-0.105458	-0.51893	-0.524012	0.6003999769593971	0.740684	-6.00316	ENSG00000168785	TSPAN5	GBA_Control_v_Control	0.36699816405757923	-2.29128	0.7885191114187169	0.4306067244084215	0.8914236720134187	-5.24993
11:34957383-34978182:+	-0.0431238	-1.71141	-0.260343	0.7946593911901128	0.8772908574914192	-6.00659	ENSG00000110435	PDHX	GBA_Control_v_Control	-0.275343	-1.00367	-0.585853	0.55812540165662194	0.9283558963272281	-5.34534
6:145804371-145806421:-	-0.0249065	-1.76549	-0.122191	0.902776	0.9410652938031157	-6.00737	ENSG00000118496	FBXO30	GBA_Control_v_Control	0.12386264605583952	2.3374577358483517	0.4473748771267608	0.6547151013379104	0.9552803304522115	-5.45276
10:49500537-49506012:-	-0.0277022	-1.74641	-0.143587	0.8858591319172222	0.9305897691090609	-6.00872	ENSG00000225830	ERCC6	GBA_Control_v_Control	0.2941503217621517	1.221458512558825	1.2685470994555887	0.2049398920906052	0.8059861096765057	-4.83567
14:22906194-22911403:-	-0.0748567	-0.839242	-0.436695	0.6624381850853955	0.784667	-6.01146	ENSG00000100461	RBM23	GBA_Control_v_Control	-0.753787	3.3821727049027976	-1.57932	0.11462505153094454	0.7345628302307478	-4.50306
11:118786051-118786518:-	0.022279588221866042	-1.68382	0.0772265	0.9384608800461953	0.9607779375594889	-6.01222	ENSG00000110367	DDX6	GBA_Control_v_Control	0.43247767169441187	4.535825628841693	0.8206812486137697	0.4120513994669923	0.8827087649054147	-5.29263
6:3283851-3298218:-	0.00589502	-1.76712	0.028704244546925214	0.9771068680632671	0.9869131889190622	-6.01407	ENSG00000137266	SLC22A23	GBA_Control_v_Control	-0.0293613	-3.61116	-0.0883558	0.9296140929427905	0.9915398309595024	-5.59164
15:65722847-65756472:-	0.019573314649822482	-1.66931	0.10510387911069725	0.9163169230570781	0.9456030201676916	-6.02052	ENSG00000174485	DENND4A	GBA_Control_v_Control	0.0555585	-4.08506	0.10768388259866786	0.914271	0.9869370526719986	-5.64753
8:102360070-102361626:-	0.13985988237764913	0.21965961609138113	0.6000257126725175	0.5486428024766996	0.6999781651659412	-6.02102	ENSG00000104517	UBR5	GBA_Control_v_Control	0.6302817994785315	3.464384901831544	1.8128268266945569	0.0702011	0.648659	-4.16472
6:13632369-13644729:-	0.10020736388922025	0.5492427026685424	0.6522094205895268	0.5144334888518765	0.6652865514800586	-6.02457	ENSG00000010017	RANBP9	GBA_Control_v_Control	0.8640736038956927	-4.31236	1.8291338687243355	0.0677444	0.648659	-4.16089
17:1636708-1637062:-	-0.0213454	-1.24234	-0.114721	0.9086919106286269	0.9423390823939527	-6.02738	ENSG00000074660	SCARF1	GBA_Control_v_Control	-0.120971	1.03619	-0.534128	0.5933889113714137	0.937919	-5.38677
12:112207873-112219489:-	0.028078213819841213	-1.69523	0.1436598267600517	0.8858014232477507	0.9305897691090609	-6.02767	ENSG00000173064	HECTD4	GBA_Control_v_Control	0.31122792577245484	1.075079611796271	0.6849147126658618	0.4935791472464649	0.9093255174783328	-5.31625
1:247860616-247868063:+	-0.0811133	-0.525252	-0.465726	0.6415250536982364	0.7732380223685132	-6.03074	ENSG00000162722	TRIM58	GBA_Control_v_Control	0.6634103737889365	5.090435570899605	1.0682041307604795	0.28572308435401317	0.8441858999972556	-5.09086
3:172247532-172251541:+	-0.0916371	1.2011136208964523	-0.701111	0.4834158325374631	0.6385957378681358	-6.03175	ENSG00000075420	FNDC3B	GBA_Control_v_Control	0.6781781312180775	1.7651628860588413	1.2736220794713096	0.2031356367432004	0.8027947461613064	-4.85514
1:28987430-28987905:+	0.0423718	-1.40651	0.19284349207746462	0.8471252765046764	0.9059507559789978	-6.03398	ENSG00000159023	EPB41	GBA_Control_v_Control	0.7367148967003168	1.2408217848260612	1.0586578187989573	0.2900478365333255	0.8463996107562392	-5.04655
9:33944364-33956146:-	-0.0669283	-0.854305	-0.43577	0.6631086897341089	0.784667	-6.03734	ENSG00000137073,ENSG00000238886	UBAP2,SNORD121A	GBA_Control_v_Control	0.4199902852367554	-4.86187	1.6114398376366206	0.10744824038179836	0.730176	-4.53887
8:21974669-21980203:+	-0.102795	0.9425172038294165	-0.692467	0.48882373930613066	0.6437137712117595	-6.03874	ENSG00000130227	XPO7	GBA_Control_v_Control	-0.385144	-4.00731	-0.803234	0.4220639006811908	0.8888546826182961	-5.32564
6:17674904-17675770:-	-0.0214678	-1.4259	-0.133877	0.8935297880204012	0.9353095474353202	-6.03991	ENSG00000124789	NUP153	GBA_Control_v_Control	0.7904957046867178	-0.390014	1.422847975537683	0.15513668259404126	0.7869319941854842	-4.65385
X:68511848-68522917:+	-0.077801	-1.1692	-0.303259	0.7617635086726473	0.8583380641377883	-6.04283	ENSG00000181704	YIPF6	GBA_Control_v_Control	-0.393179	0.5483113768757026	-0.555613	0.5786173024449428	0.937919	-5.3904
1:117402185-117414831:+	0.0123026	-1.34797	0.0535704	0.9572894057372521	0.9724628712435692	-6.04361	ENSG00000198162	MAN1A2	GBA_Control_v_Control	0.0152672	2.7519090011172382	0.0565569	0.9549110987171749	0.9951955291565148	-5.54557
12:123498543-123499536:-	-0.0181567	-1.3403	-0.116134	0.907573	0.9423390823939527	-6.04394	ENSG00000188026	RILPL1	GBA_Control_v_Control	-0.140619	-1.13329	-0.732922	0.46380210272711375	0.8992031284658809	-5.26674
5:14741826-14758598:-	-0.0353764	-1.39708	-0.210004	0.8337124869905232	0.8980398606725193	-6.04511	ENSG00000154122	ANKH	GBA_Control_v_Control	-0.532339	-0.411088	-0.935155	0.34996644622750006	0.8641083282587833	-5.1297
1:151315572-151316509:-	-0.0336714	-1.36749	-0.198502	0.842698	0.9052164531734619	-6.04604	ENSG00000143393	PI4KB	GBA_Control_v_Control	0.0640798	2.652479092780302	0.23267286948564006	0.81607	0.9821086447545352	-5.53764
14:103498501-103500200:+	0.010264858361284324	-1.31999	0.0540106	0.9569387507564378	0.9724628712435692	-6.04884	ENSG00000075413	MARK3	GBA_Control_v_Control	-0.0192744	0.9491096805118557	-0.0686416	0.9452905705525444	0.9944504185198759	-5.50687
2:232787149-232796221:+	0.0166624	-1.41736	0.0985849	0.9214898956314418	0.9486091568149545	-6.04906	ENSG00000204120	GIGYF2	GBA_Control_v_Control	0.39248461762859543	1.9920283798666194	1.0419046440113937	0.2977437077467178	0.8545498894132294	-5.07804
4:73090666-73092300:-	0.0771467	-0.369489	0.5067987117456266	0.6124208497860442	0.748639	-6.04973	ENSG00000132466	ANKRD17	GBA_Control_v_Control	0.7891274412363591	-0.0446159	1.8845052601572614	0.059827950952224464	0.648659	-4.01524
12:101714089-101716812:+	-0.111504	-0.455015	-0.440825	0.6594476850520008	0.7824824474927982	-6.05034	ENSG00000111666	CHPT1	GBA_Control_v_Control	0.0251549	3.5041135269518864	0.0812244	0.9352820552736681	0.9915398309595024	-5.5757
11:16014941-16097688:-	-0.0268704	-1.27708	-0.175936	0.8603840350056978	0.9127312482406379	-6.05068	ENSG00000110693	SOX6	GBA_Control_v_Control	-0.393986	-4.32151	-0.932478	0.35134943994063894	0.8653015957681498	-5.26107
13:113610995-113623286:+	-0.0317028	-1.24109	-0.133963	0.8934622389437762	0.9353095474353202	-6.05275	ENSG00000198176	TFDP1	GBA_Control_v_Control	0.10671653553434979	2.0545432391798766	0.3516754813061428	0.7251663103931243	0.9670804091739919	-5.48674
11:124986741-125005212:+	-0.0406856	-1.22093	-0.241616	0.8091328189367513	0.8824418125604148	-6.05475	ENSG00000149548	CCDC15	GBA_Control_v_Control	0.12011996104943812	-1.52301	0.3314437597353415	0.7403886885747931	0.9711817250914669	-5.44785
11:57491223-57491862:-	0.0372546	-1.19659	0.13610958145471128	0.8917657112502428	0.9349768162569385	-6.05527	ENSG00000149150	SLC43A1	GBA_Control_v_Control	0.25638064543637284	-0.373204	1.1567119302254558	0.24770564576024393	0.840945	-4.93238
20:47246007-47249439:-	-0.0311751	-1.18336	-0.190336	0.8490890156035248	0.9068832424925687	-6.05663	ENSG00000101040	ZMYND8	GBA_Control_v_Control	-0.172737	-0.0489019	-0.516171	0.6058656130159938	0.937919	-5.38242
11:16095995-16111926:-	-0.0273559	-1.14018	-0.143092	0.88625	0.9305897691090609	-6.06119	ENSG00000110693	SOX6	GBA_Control_v_Control	0.020610566956598575	-5.4575	0.1432946540927547	0.8861800946138425	0.9837948889599599	-5.71187
12:2820085-2821792:+	0.0204238	-0.973569	0.12114726274018107	0.9036015778851347	0.9411582191495913	-6.06396	ENSG00000111203	ITFG2	GBA_Control_v_Control	0.16086444780634057	2.6862577788084274	0.7849620016203283	0.43268823928014954	0.8924859382694976	-5.29106
11:16046513-16097688:-	0.016334838803343743	-1.39393	0.097072	0.9226909103895462	0.9492635040098334	-6.06483	ENSG00000110693	SOX6	GBA_Control_v_Control	0.023534646578581717	1.1048979448046607	0.0467679	0.962709	0.9951955291565148	-5.51284
19:3623687-3624162:-	-0.0375911	-0.638621	-0.274605	0.7836829240909446	0.872884	-6.06581	ENSG00000105298	CACTIN	GBA_Control_v_Control	0.0512839	1.6575550110552755	0.4374586164223993	0.6618866915620714	0.9579118935070294	-5.44645
19:12928341-12928847:-	0.011586636012312024	-1.02423	0.0510252	0.9593168448646483	0.9724628712435692	-6.06943	ENSG00000179115	FARSA	GBA_Control_v_Control	0.14952916016352935	1.2156363552527791	0.6827256993806581	0.49496082581589984	0.9093255174783328	-5.31548
8:130152735-130180880:-	0.1001281720108187	1.6727140363416224	0.7080457973334803	0.47910110345331225	0.6369047923183779	-6.07297	ENSG00000153317	ASAP1	GBA_Control_v_Control	0.5718725873393897	-1.91123	0.885253	0.37626361164646804	0.8823077098619806	-5.18195
16:71658232-71679535:-	0.047433713054307436	-0.902724	0.24530180994170608	0.8062789660435257	0.8824418125604148	-6.07527	ENSG00000040199	PHLPP2	GBA_Control_v_Control	0.5593333838675143	-3.90224	1.2734153457030484	0.2032089143052741	0.8027947461613064	-4.90139
19:5047475-5082504:+	0.067167	0.4994459246225108	0.554933	0.5790792115061518	0.7276710588484638	-6.07545	ENSG00000127663	KDM4B	GBA_Control_v_Control	0.0676227	0.6067258563679947	0.14976822451359875	0.8809819971938684	0.9826798758222193	-5.51313
7:50319047-50327757:+	0.0953347	0.0320281	0.4366953566449284	0.6624380592170025	0.784667	-6.07748	ENSG00000185811	IKZF1	GBA_Control_v_Control	0.4037506646709164	3.498265685223205	0.830508	0.40647798874036567	0.8827087649054147	-5.284
19:18537600-18538433:-	-0.0942477	0.8319907303587722	-0.576055	0.5647225505931699	0.7150597001854693	-6.08309	ENSG00000105701	FKBP8	GBA_Control_v_Control	0.020670127173419317	4.302830416647004	0.048210844474631344	0.9615592104550401	0.9951955291565148	-5.5875
15:92996956-93002317:+	-0.0285464	-1.05334	-0.162787	0.8707226677611406	0.9211993441530908	-6.0832	ENSG00000173575	CHD2	GBA_Control_v_Control	0.16316570245162154	2.4653046892710915	0.3550988160722115	0.7226011478154069	0.9670804091739919	-5.50881
12:69755383-69756663:+	-0.039793	-0.793872	-0.233038	0.8157849541833592	0.8865391184944078	-6.08522	ENSG00000127328	RAB3IP	GBA_Control_v_Control	0.028534341240790795	-0.285199	0.057601711072177354	0.9540790392700339	0.9951955291565148	-5.49346
7:2229983-2230727:-	-0.025172	-0.66033	-0.19214	0.8476763773930943	0.9059507559789978	-6.08762	ENSG00000002822,ENSG00000286192	MAD1L1,AC069288.1	GBA_Control_v_Control	0.046689528977524875	-4.06816	0.0948788	0.9244328392680177	0.9901957757251683	-5.60484
22:41125863-41140257:+	-0.0552893	-0.391865	-0.368613	0.7125032090041672	0.8227598954043993	-6.09416	ENSG00000100393	EP300	GBA_Control_v_Control	0.1895434001669961	-4.82877	0.48915799891822864	0.6248656363704298	0.938416	-5.56496
9:33948373-33953474:-	0.054753709821121266	-0.122056	0.416387	0.6772268453830068	0.7934400143010568	-6.0944	ENSG00000137073,ENSG00000238886	UBAP2,SNORD121A	GBA_Control_v_Control	-0.112217	-5.09191	-0.35286	0.7243073236219177	0.9670804091739919	-5.64671
17:45475099-45475726:-	0.15507743804489982	-0.0384367	0.41579673486469604	0.6776610961928026	0.7934400143010568	-6.09621	ENSG00000225190,ENSG00000284055	PLEKHM1,MIR4315-1	GBA_Control_v_Control	0.3652977464149226	0.9102374785182421	1.006833764544632	0.3142930376848808	0.8559777364617792	-5.08392
16:3850296-3851009:-	-0.0661651	-0.143708	-0.362695	0.716919	0.8255874320237789	-6.10106	ENSG00000005339	CREBBP	GBA_Control_v_Control	0.4179672070051321	2.9449115874408767	1.6043079837025351	0.10900691254350882	0.730176	-4.46448
10:16752538-16782084:-	0.031607	-0.644477	0.21038549624610856	0.8334146813508431	0.8980398606725193	-6.10667	ENSG00000148484	RSU1	GBA_Control_v_Control	0.43899780561475826	4.238698101407975	1.5700908026760785	0.11675544369507886	0.7357016639037067	-4.52291
9:33948373-33956146:-	0.0650811	0.6085636388356035	0.5064794648528184	0.6126448008702368	0.748639	-6.11134	ENSG00000137073,ENSG00000238886	UBAP2,SNORD121A	GBA_Control_v_Control	0.12256439173166367	-4.42455	0.3453581887704003	0.7299081212309246	0.9673821440412214	-5.56293
1:45640209-45642499:-	-0.08993	2.1170659401541774	-0.693828	0.48796999042623235	0.6430938884816673	-6.11334	ENSG00000159592	GPBP1L1	GBA_Control_v_Control	-0.466656	1.8862963363319791	-1.01914	0.308418	0.8559777364617792	-5.09385
12:112203635-112228811:-	0.0549365	-0.485779	0.2761514940268488	0.7824954421081682	0.872884	-6.11814	ENSG00000173064	HECTD4	GBA_Control_v_Control	0.23005576512421333	-2.7365	0.42905089971183286	0.6679918079719628	0.9579118935070294	-5.4559
4:105233896-105237351:+	-0.0163584	-0.827693	-0.109091	0.9131549018372047	0.9434047357890688	-6.1261	ENSG00000168769	TET2	GBA_Control_v_Control	0.24668111924038072	4.339241653835963	1.3125719502960709	0.1896712670418114	0.8007786065832116	-4.84209
1:117402185-117442325:+	0.025279610022230337	-0.473425	0.13760831790770378	0.8905809218515024	0.9345533548679202	-6.12941	ENSG00000198162	MAN1A2	GBA_Control_v_Control	0.2953680763666826	1.7028704993359403	0.7351960357450398	0.4624171370915868	0.8992031284658809	-5.30783
17:20017986-20110562:+	-0.00576835	-0.701539	-0.0350421	0.9720540082815294	0.9825880071671812	-6.13289	ENSG00000128487,ENSG00000225681	SPECC1,AC005730.1	GBA_Control_v_Control	0.064477	1.25976	0.26446108243630756	0.7914869040221226	0.9821086447545352	-5.48788
19:17101659-17102557:+	-0.0327194	-0.209684	-0.202173	0.8398271599087005	0.9033118523297297	-6.13921	ENSG00000099331	MYO9B	GBA_Control_v_Control	0.0152981	4.465068170981614	0.0533966	0.9574281347362937	0.9951955291565148	-5.58576
3:31576395-31580096:+	-0.00322467	-0.448945	-0.0156667	0.9875038120304835	0.9924689356284129	-6.1393	ENSG00000163527	STT3B	GBA_Control_v_Control	0.8719148181122942	2.5975443299536267	1.8860346603703515	0.059621305294238536	0.648659	-4.04115
16:1809237-1809833:-	-0.0803249	0.21454510926671633	-0.345644	0.7296921931172122	0.8340048960134782	-6.14449	ENSG00000063854	HAGH	GBA_Control_v_Control	0.31930906833108086	0.3552903975119059	0.7066411789713095	0.47997763718262654	0.9005743835877682	-5.30822
16:31090774-31091342:-	0.0245599	0.054949	0.19248011063180506	0.8474097963127213	0.9059507559789978	-6.15174	ENSG00000255439,ENSG00000167397	AC135050.2,VKORC1	GBA_Control_v_Control	0.0642404	2.3121841363102025	0.4561316600839489	0.6484084479701943	0.9529980119380987	-5.4584
4:87046165-87047594:+	-0.0574418	-0.0777574	-0.262369	0.7930978966884515	0.8772908574914192	-6.15435	ENSG00000172493	AFF1	GBA_Control_v_Control	0.6147836434565641	1.7633015615051442	1.5801338601925752	0.114438	0.7345628302307478	-4.47514
9:125337017-125337591:+	-0.0206486	0.0398549	-0.0884944	0.9295037615010073	0.9527697286692254	-6.17181	ENSG00000165219	GAPVD1	GBA_Control_v_Control	0.8516485014179249	-0.37251	1.6037434516805262	0.10913152399824362	0.730176	-4.42599
16:68121986-68123121:+	0.010621500196978051	0.41112710742624414	0.0542742	0.9567287836935201	0.9724628712435692	-6.18217	ENSG00000072736,ENSG00000261864	NFATC3,AC130462.3	GBA_Control_v_Control	0.2768514785999394	3.1027407079414817	0.9008359188533819	0.3679234275159625	0.8801117196442911	-5.21969
10:124681606-124682379:-	0.030543137651671937	0.23759068143961293	0.18858618291586154	0.8504599006577881	0.9072057162831112	-6.1828	ENSG00000258539,ENSG00000189319	AC068896.1,FAM53B	GBA_Control_v_Control	0.10823396753301234	1.1770905966210397	0.42445486593742565	0.671338	0.9579118935070294	-5.44523
15:65729071-65738875:-	-0.049422	0.6440781281238798	-0.310796	0.7560281564463776	0.8553714788904769	-6.19095	ENSG00000174485	DENND4A	GBA_Control_v_Control	-0.0279727	-5.40435	-0.0884516	0.9296335147529876	0.9915398309595024	-5.70398
8:140585118-140605914:-	-0.0195044	0.626802	-0.144136	0.8854255997502488	0.9305897691090609	-6.22536	ENSG00000123908	AGO2	GBA_Control_v_Control	0.00445714	1.174710734817822	0.00789467	0.9937028279995378	0.9990718280437094	-5.52378
15:41356038-41377304:+	-0.0433107	0.9841199306365748	-0.276155	0.7824927395095128	0.872884	-6.23362	ENSG00000285920,ENSG00000137804	AC087721.2,NUSAP1	GBA_Control_v_Control	0.1808156076369506	-0.0034188	0.9972547052050391	0.31891648598687006	0.8559777364617792	-5.07727
1:47280240-47282459:-	-0.0191484	0.8922520695993322	-0.125353	0.900272	0.9400229334488526	-6.26222	ENSG00000123473	STIL	GBA_Control_v_Control	-0.387003	-1.44479	-1.47443	0.1407248486130496	0.7708265928614896	-4.58853
15:63696123-63716473:-	-0.025809	1.0855808339237605	-0.17504	0.8610877291323231	0.9127312482406379	-6.26619	ENSG00000103657	HERC1	GBA_Control_v_Control	-0.391098	1.006245764283584	-0.813765	0.41600117299657435	0.8841341385585421	-5.23481
15:64499292-64500166:+	0.0922206	2.6656806330205938	0.43506009592383005	0.6636258046276213	0.784667	-6.29532	ENSG00000180357	ZNF609	GBA_Control_v_Control	0.376889	2.4099448012666276	1.8926538196738898	0.0587336	0.648659	-4.02667
19:18537600-18538436:-	0.025803	2.4687	0.2660231235669835	0.7902826486186667	0.875951	-6.34111	ENSG00000105701	FKBP8	GBA_Control_v_Control	0.5284366534768217	-1.21485	0.6458488228885735	0.5185466182049085	0.9210556552849787	-5.32168
12:829061-829944:+	-0.0339987	2.6038606296118805	-0.221288	0.824919	0.8935731684064439	-6.37292	ENSG00000060237	WNK1	GBA_Control_v_Control	0.060064008906484556	2.039416008956001	0.5558855779708801	0.5784311310321538	0.937919	-5.40799
6:4891712-4892379:+	-0.0172428	2.965365180862854	-0.0856356	0.9317756426637812	0.9545157437660089	-6.43293	ENSG00000153046	CDYL	GBA_Control_v_Control	0.044269072970347434	-1.97558	0.0732471	0.9416262042592873	0.9925242669922577	-5.49699
22:45178237-45178900:+	-1.28284	-0.782921	-4.14476	3.7311154231628265e-5	0.0626454	1.6145986641007566	ENSG00000093000	NUP50	GBA_PD_v_Control	-0.807762	2.471970656615977	-1.69329	0.0907571	0.8725810344454062	-4.20757
11:45862059-45872233:+	-0.834297	-1.74375	-3.57379	3.706504231879574e-4	0.294349	-0.316715	ENSG00000121671	CRY2	GBA_PD_v_Control	-0.667609	1.0390774372456497	-2.13681	0.0328905	0.7176023914429209	-3.59306
4:73090666-73092300:-	-0.598279	-0.369489	-3.47044	5.444266854892956e-4	0.294349	-0.461254	ENSG00000132466	ANKRD17	GBA_PD_v_Control	-0.287669	-0.0446159	-0.600027	0.5486436775118755	0.9923391548512702	-5.08539
4:48590658-48605833:-	-0.885607	-2.77139	-3.35259	8.341533114484563e-4	0.294349	-1.02627	ENSG00000075539	FRYL	GBA_PD_v_Control	-0.180029	-1.64231	-0.233693	0.8152778267752423	0.9923391548512702	-5.20507
8:100259106-100288267:-	-0.801908	-2.68853	-3.28172	0.00107168	0.294349	-1.19703	ENSG00000034677	RNF19A	GBA_PD_v_Control	-0.830318	-1.02268	-0.983008	0.3258753077671789	0.9565266866505808	-4.87775
10:12400015-12403369:+	0.8727819225283548	-2.03144	3.2428500654427848	0.00122719	0.294349	-1.24403	ENSG00000183049	CAMK1D	GBA_PD_v_Control	1.0410921236738702	0.33135759848323004	2.3308291176030584	0.0199888	0.670038	-3.28873
19:7184315-7184637:-	-0.850982	-2.69131	-3.2654	0.0011346	0.294349	-1.24931	ENSG00000171105	INSR	GBA_PD_v_Control	-1.12262	-2.58398	-2.65151	0.00815818	0.6284897802131401	-2.68023
5:139600371-139623461:+	-0.738363	-2.7772	-2.9989	0.00278457	0.5844105979976773	-1.87813	ENSG00000131508	UBE2D2	GBA_PD_v_Control	-0.431807	-1.62978	-0.544565	0.5861914475192435	0.9923391548512702	-5.10638
19:41341882-41342247:-	-0.644072	-2.85847	-2.7012	0.00703947	0.9977978429610361	-2.53581	ENSG00000105329	TGFB1	GBA_PD_v_Control	-1.36085	1.346004784647575	-2.57706	0.010127292448782719	0.6284897802131401	-2.85157
19:34327420-34330347:+	-0.677018	-2.96859	-2.63435	0.00857546	0.9977978429610361	-2.67068	ENSG00000166398	GARRE1	GBA_PD_v_Control	-1.31417	0.586372	-2.50023	0.012593406325954055	0.670038	-2.99601
4:2949933-2953645:-	0.6089343875322182	-2.7516	2.6281429441638875	0.00873224	0.9977978429610361	-2.67851	ENSG00000087269	NOP14	GBA_PD_v_Control	0.8384756604507118	1.5639684861292207	1.7751747294345825	0.0762167	0.845073	-4.09874
7:7234302-7243750:+	-0.550662	-2.07592	-2.59934	0.00949418	0.9977978429610361	-2.71846	ENSG00000106392	C1GALT1	GBA_PD_v_Control	-0.0027936	2.244671882981059	-0.00529161	0.9957791291377938	0.9999273104817684	-5.24528
5:95906522-95932713:-	-0.698247	-2.93171	-2.58217	0.00997585	0.9977978429610361	-2.77187	ENSG00000118985	ELL2	GBA_PD_v_Control	-1.09571	-0.768716	-2.04066	0.041584178698314135	0.7757759559385492	-3.73878
6:138943512-138944622:-	-0.897126	-1.74567	-2.55926	0.010655998705733975	0.9977978429610361	-2.7889	ENSG00000135597	REPS1	GBA_PD_v_Control	-0.857121	1.2590040871962591	-1.89003	0.0590845	0.8198584425107018	-3.9475
14:24266429-24268619:-	-0.586332	-2.57099	-2.56993	0.010332728418379667	0.9977978429610361	-2.79136	ENSG00000100949	RABGGTA	GBA_PD_v_Control	-0.820563	-1.72027	-2.92905	0.00348828	0.535426	-2.17055
3:172247532-172251541:+	0.3733169720772329	1.2011136208964523	2.5021837504300426	0.012520361521803506	0.9977978429610361	-2.90203	ENSG00000075420	FNDC3B	GBA_PD_v_Control	0.9505695895094743	1.7651628860588413	1.5617963948776805	0.11869760032834294	0.877944	-4.36178
17:67891843-67894165:+	-0.841478	-2.65639	-2.50347	0.012477081158021841	0.9977978429610361	-2.91893	ENSG00000171634	BPTF	GBA_PD_v_Control	-1.78894	-0.430488	-2.19619	0.028339867887410046	0.7086798229041559	-3.5022
7:39987598-40002031:+	-0.634947	-2.93727	-2.48127	0.0132741	0.9977978429610361	-2.96752	ENSG00000065883	CDK13	GBA_PD_v_Control	-1.31341	1.1683515452954494	-1.96785	0.049400671124981435	0.8079375034654357	-3.84034
14:103498501-103500200:+	-0.514203	-1.31999	-2.38027	0.017508623027011474	0.9977978429610361	-3.13634	ENSG00000075413	MARK3	GBA_PD_v_Control	-0.144897	0.9491096805118557	-0.451791	0.6515313501987441	0.9923391548512702	-5.15135
11:65435052-65437657:+	-0.571683	-2.76752	-2.3886	0.017119060716360355	0.9977978429610361	-3.14031	ENSG00000245532	NEAT1	GBA_PD_v_Control	-2.00744	1.3523765335481268	-2.42704	0.015423584804828437	0.670038	-3.11689
16:14627105-14627336:-	-0.623805	-2.56076	-2.36315	0.018333387993988357	0.9977978429610361	-3.18196	ENSG00000140694	PARN	GBA_PD_v_Control	-1.41398	0.5432364680686785	-2.31425	0.020884808854051747	0.670038	-3.31503
9:120437294-120448126:-	-0.463028	-2.0733	-2.32759	0.020156084187778336	0.9977978429610361	-3.23949	ENSG00000136861	CDK5RAP2	GBA_PD_v_Control	-0.653472	0.9899911994477126	-1.36732	0.17187587875154814	0.907483	-4.55593
[truncated: 15,089 more rows]

## Sheet: STable 4
type	contrast	mean_t_statistic	lower_ci	upper_ci	p_value
BSJ	GBA_Control_v_Control	-1.34479	-1.40242	-1.28738	0
[truncated: 19 more rows]

## Sheet: STable 5
contrast	diff_t_statistic	p_value
[truncated: 10 more rows]

[truncated: 5 more sheets: STable 6, STable 7, STable 8, STable 9, STable 10]
