# Supplementary material
Source: Research Square preprint supplement (doi:10.21203/rs.3.rs-9178344/v1)
Supplement: Supplementary file 1 [file a1e852dfa785c774a57fe5d4.docx]

**Supplementary Material**


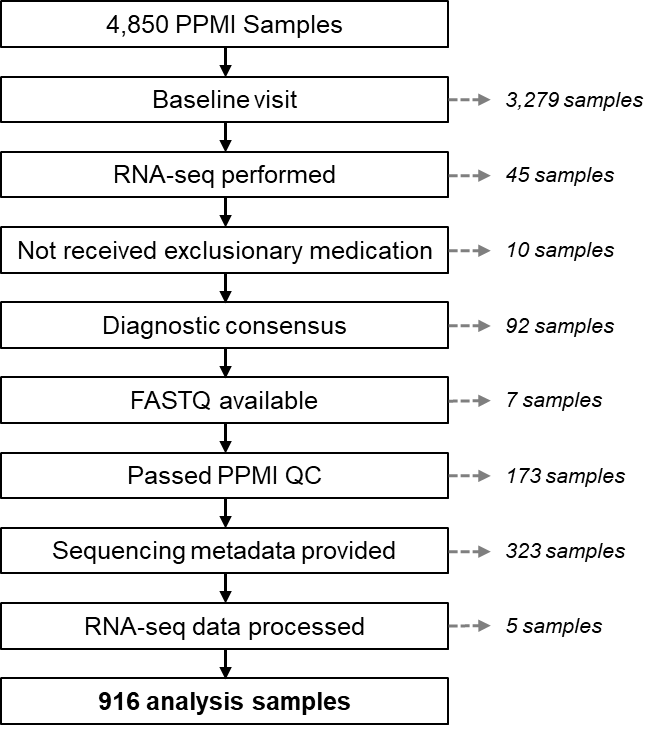


**Supplementary Figure 1. PPMI analysis sample selection.** The number of samples excluded at each step is shown on the right-hand side.





**Supplementary Figure 2. RNA expression variation.** **(a)** First two RNA expression principal components. **(b)** Associations between five RNA expression principal components and technical sequencing metrics. Blank tiles had an FDR-adjusted *P* > 0.05. **(c)** Selection of explanatory PC1 models using technical metrics that maximises the Bayesian information criterion (BIC). **(d)** Individual RNA expression variation attributable to select biological and technical covariates.


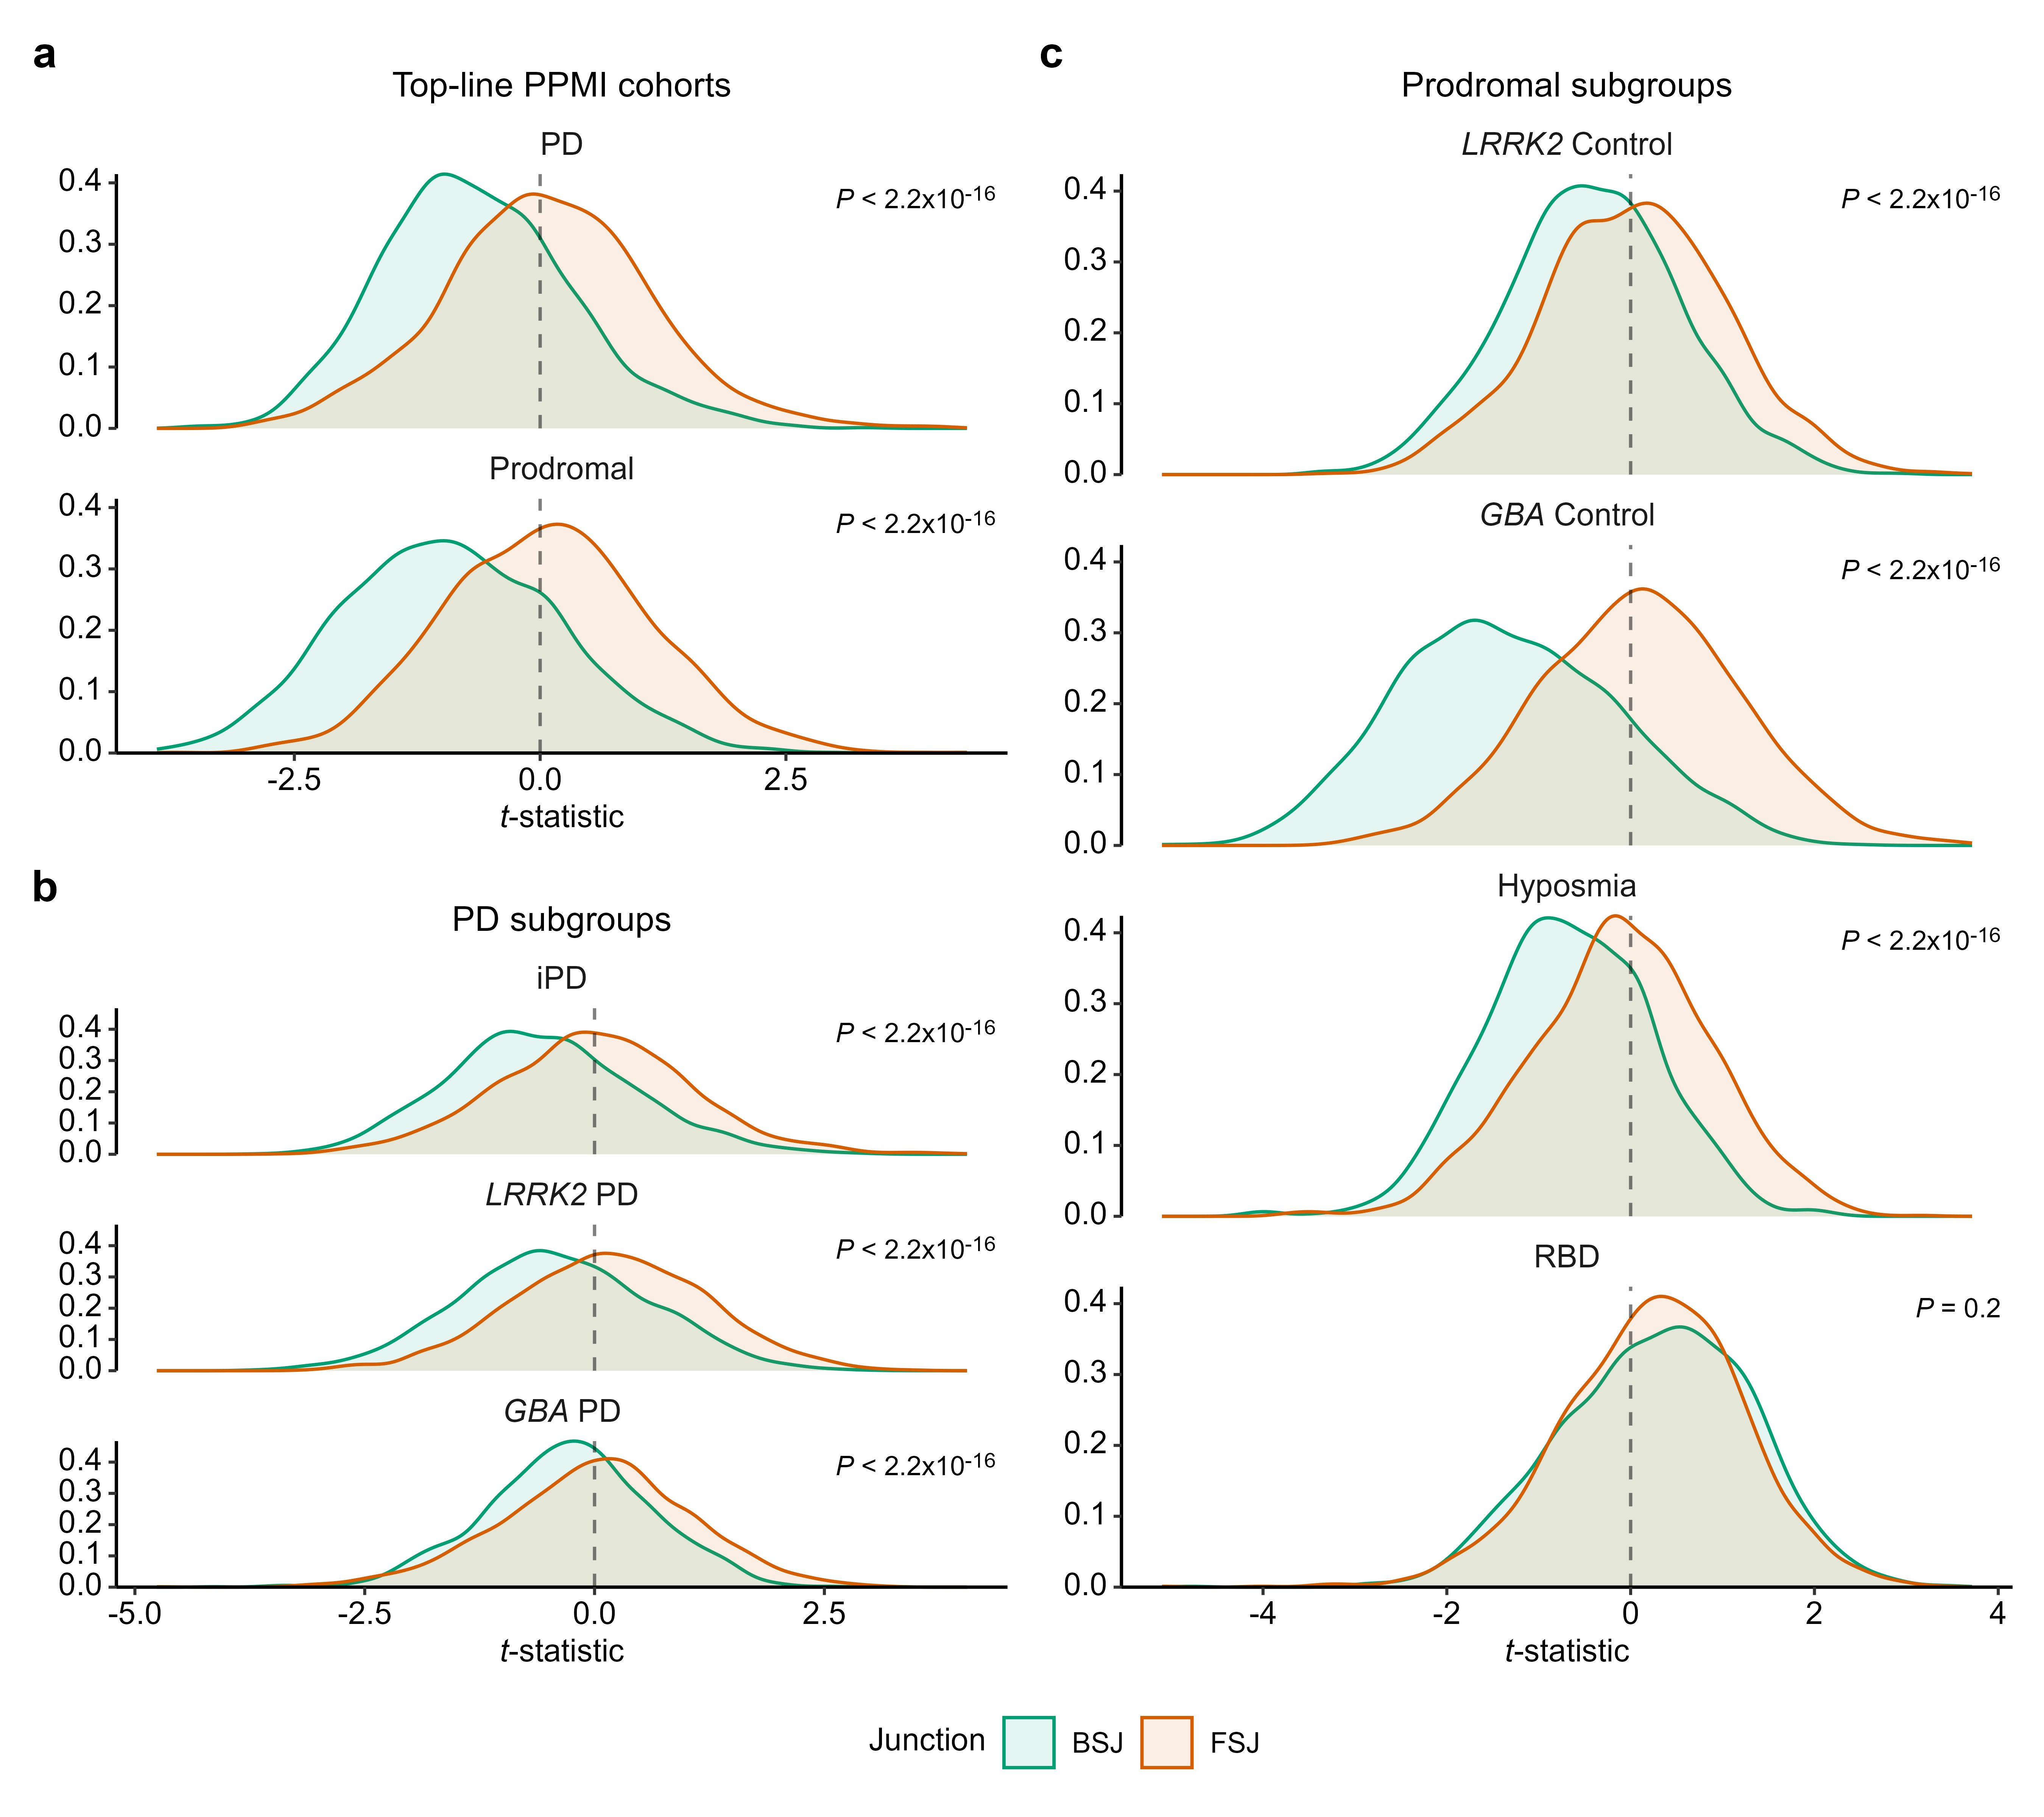


**Supplementary Figure 3. Distribution of splice junction moderated t-statistics.** Moderated t-statistics comparing circRNA (BSJ) and linear RNA (FSJ) expression levels to Controls (n = 162) across **(a)** top-line PPMI cohorts (PD n = 490, Prodromal n = 264), **(b)** PD subgroups (iPD n = 324, *LRRK2* PD n = 125, *GBA* PD n = 36), **(c)** Prodromal subgroups (*LRRK2* control n = 136, *GBA* Control n = 76, Hyposmia n = 18, RBD n = 24). Significance assessed using permutation testing. Reported *P*-values are uncorrected as only one test was performed per comparison.


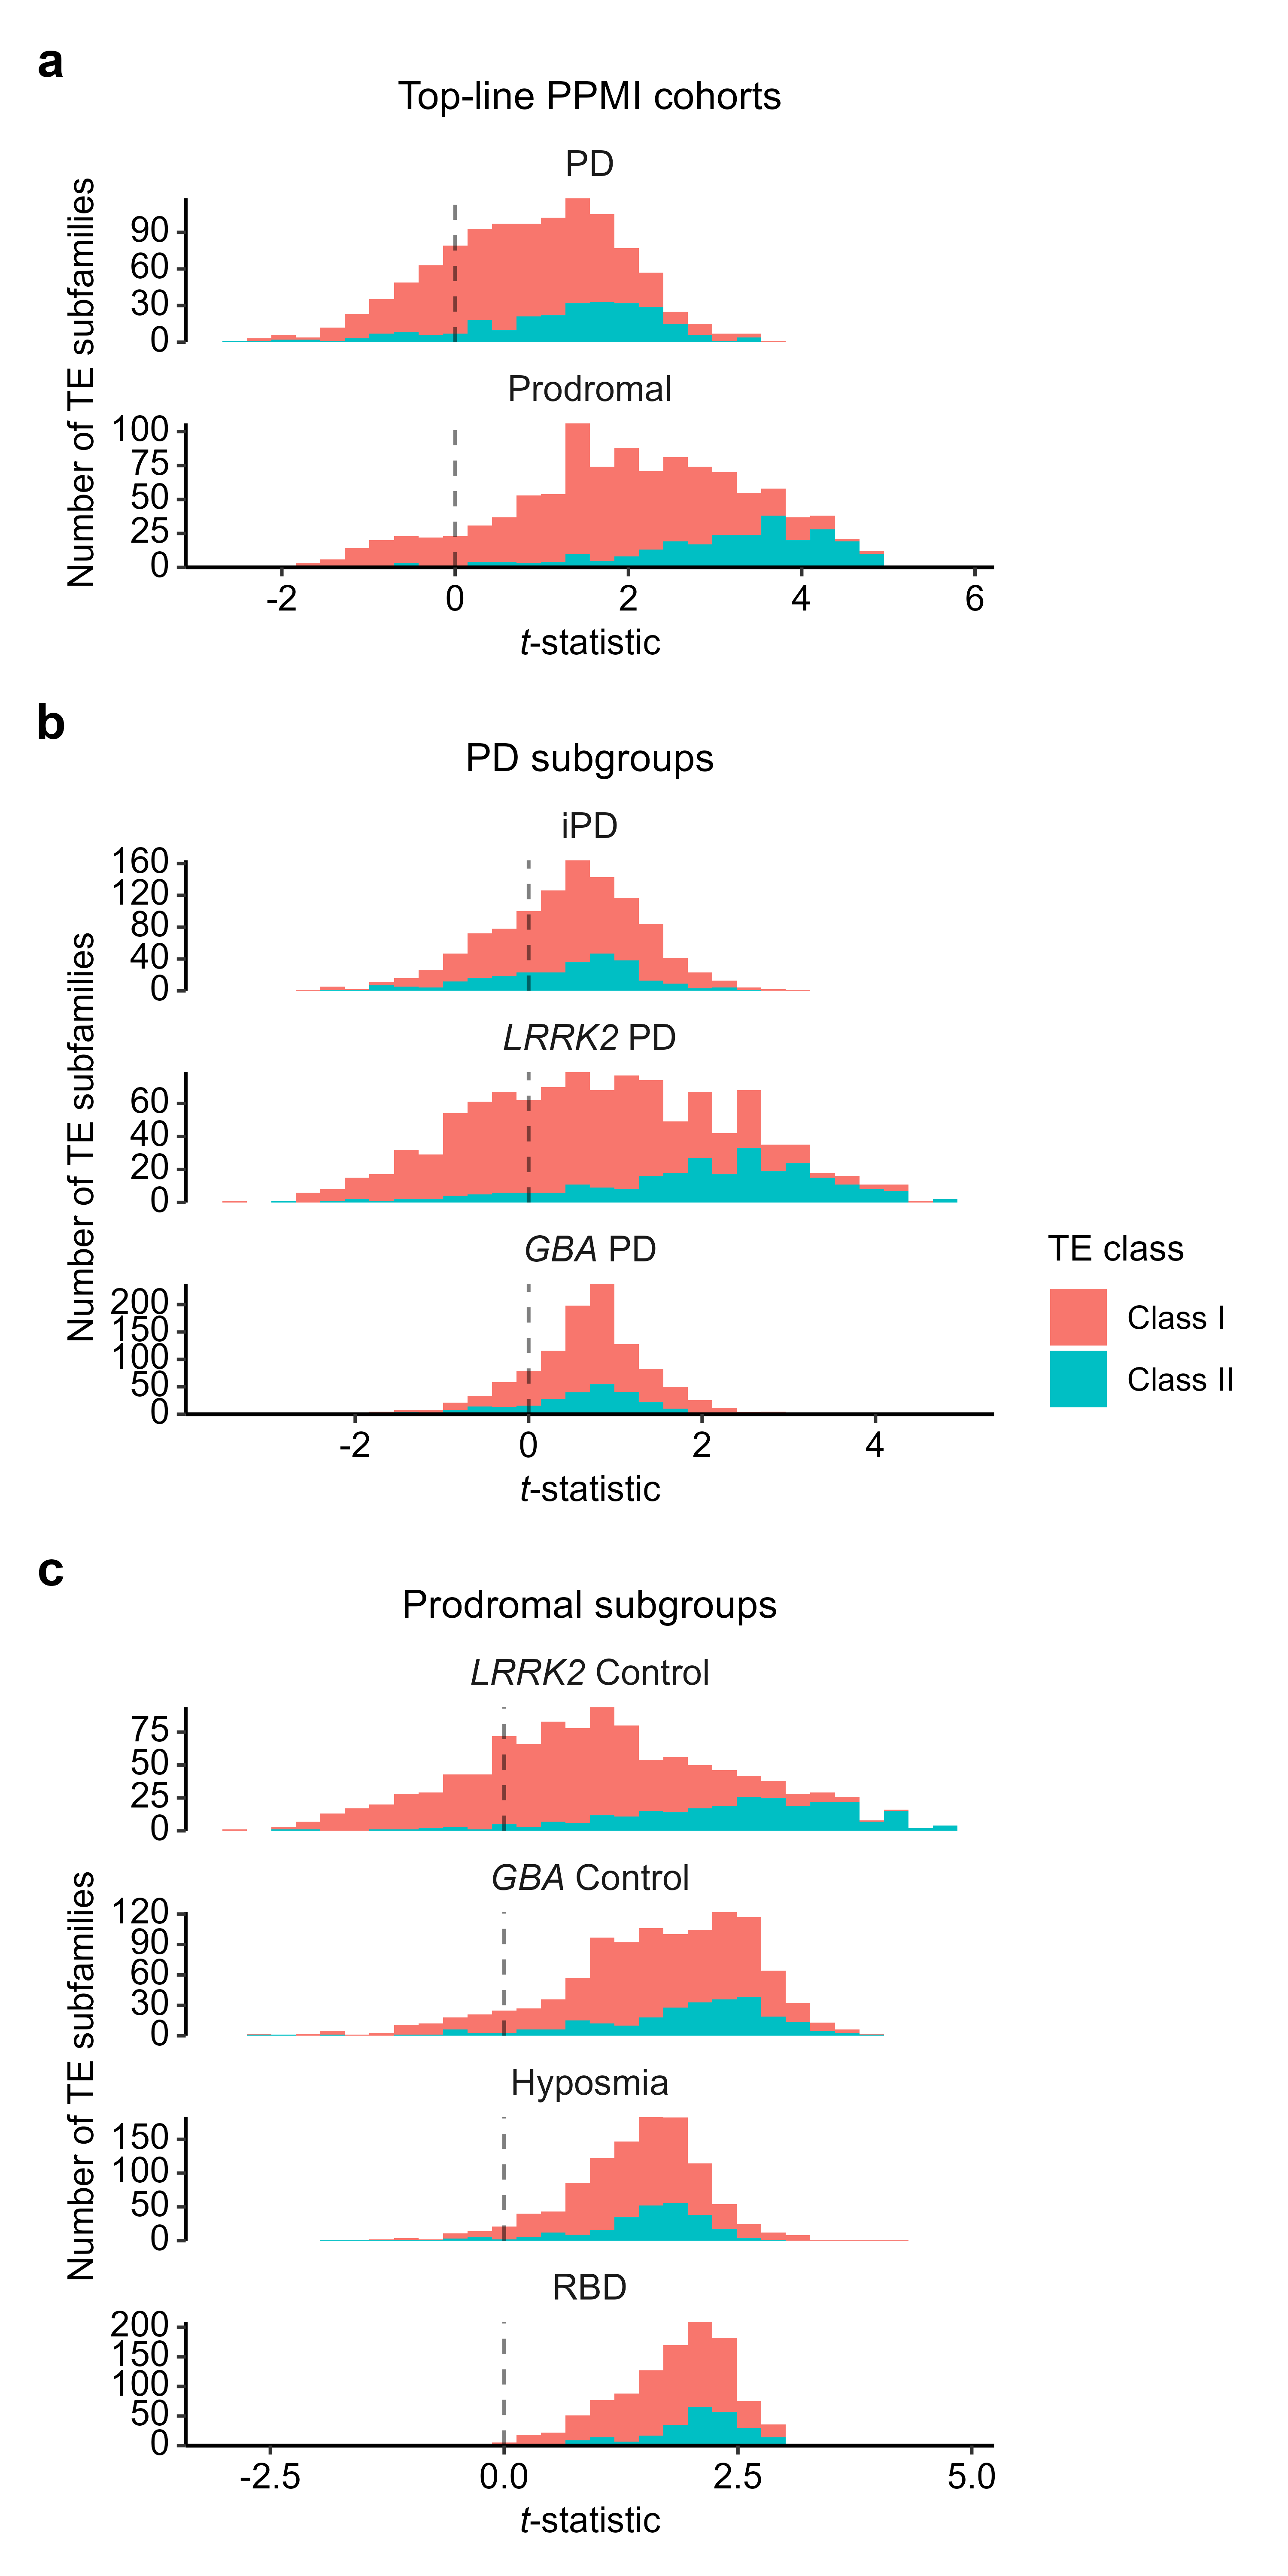


**Supplementary Figure 4. Blood transposable element t-statistic distributions**. Moderated t-statistics comparing Class I and II transposable element subfamily expression to Controls (n = 162) across **(a)** top-line PPMI cohorts (PD n = 490, Prodromal n = 264), **(b)** PD subgroups (iPD n = 324, *LRRK2* PD n = 125, *GBA* PD n = 36), **(c)** Prodromal subgroups (*LRRK2* control n = 136, *GBA* Control n = 76, Hyposmia n = 18, RBD n = 24).
